# Supplementary material for: Synthesis of medium-sized heterocycles from oxetanes based on an allylic amination/ring-opening strategy
Source: Royal Society of Chemistry journal article supplement (doi:10.1039/d3cc04355j), 2023-01-01
Supplement: d3cc04355j1.pdf [file d3cc04355j1.pdf]

Supporting Information

**Synthesis of Medium-sized Heterocycles from Oxetanes  
Based on an Allylic Amination/Ring-opening Strategy**

Jixing Li,<sup>1</sup> Ming Fang,<sup>1</sup> Maoyan Liao,<sup>1</sup> Hongling Xie,<sup>1</sup> Xiu-Qin Dong,<sup>4</sup> Zhengyu

Han,<sup>1,2,\*</sup> Jianwei Sun,<sup>3</sup> Hai Huang<sup>1,\*</sup>

<sup>1</sup> *Jiangsu Key Laboratory of Advanced Catalytic Materials & Technology, School of Petrochemical Engineering, Changzhou University, Changzhou (China)*

<sup>2</sup> *Jiangsu Province Key Laboratory of Fine Petrochemical Engineering, Changzhou University, Changzhou 213164, China*

<sup>3</sup> *Department of Chemistry, The Hong Kong University of Science and Technology, Clear Water Bay, Kowloon, Hong Kong SAR (China)*

<sup>4</sup> *College of Chemistry and Molecular Sciences, Engineering Research Center of Organosilicon Compounds & Materials, Ministry of Education, Wuhan University, Wuhan, Hubei, 430072, China*

**Table of Contents**

|                                                                      |     |
|----------------------------------------------------------------------|-----|
| I. General Information.....                                          | S2  |
| II. Preparation of Substrates and characterization.....              | S3  |
| III. The Optimization of Reaction Conditions for 1,4-Oxazepanes..... | S13 |
| IV. Synthesis of Medium-sized Heterocycles.....                      | S15 |
| V. Gram-scale Synthesis and Derivation of Products .....             | S35 |

NMR Specturm

## I. General Information

Flash column chromatography was performed over silica gel (200-300 mesh) purchased from Qindao Puke Co. Lit., China. All air or moisture sensitive reactions were conducted in oven-dried glassware under nitrogen atmosphere using anhydrous solvents. Anhydrous toluene, acetonitrile, dichloromethane, chloroform, dimethyl sulfoxide and tetrahydrofuran were purified by the Innovative<sup>®</sup> solvent purification system. Other anhydrous solvents were purchased from J&K Scientific. <sup>1</sup>H, <sup>13</sup>C and <sup>19</sup>F NMR spectra were collected on a Bruker AV 400 MHz NMR spectrometer using residue solvent peaks as an internal standard (<sup>1</sup>H NMR: CDCl<sub>3</sub> at 7.26 ppm, Acetone-*d*<sub>6</sub> at 2.05 ppm, Benzene-*d*<sub>6</sub> at 7.16 ppm,; <sup>13</sup>C NMR: CDCl<sub>3</sub> at 77.15 ppm, Acetone-*d*<sub>6</sub> at 206.26 ppm, Benzene-*d*<sub>6</sub> at 128.06 ppm). Mass spectra were collected on an Agilent GC/MS 5975C system, a MALDI Micro MX mass spectrometer, or an API QSTAR XL System with TOF as mass analyzer.

## II. Preparation of Substrates and characterization

Substrates **1a-1i** and **5** are known compounds, were synthesized according to the literature procedure.

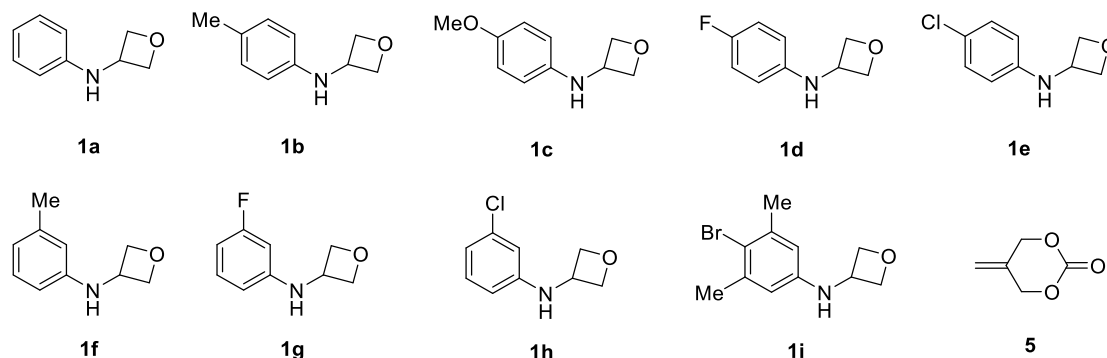

### General Procedure A: Preparation of 3-Aminooxetanes.<sup>[1]</sup>

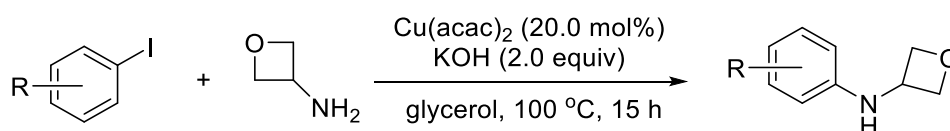

Under  $\text{N}_2$  atmosphere, to a solution of iodobenzenes (5.0 mmol, 1.0 equiv), 3-aminooxetane (548.2 mg, 7.5 mmol, 1.5 equiv) and KOH (561.1 mg, 10.0 mmol, 2.0 equiv) in glycerol (25 mL) was added  $\text{Cu(acac)}_2$  (26.2 mg, 1.0 mmol, 0.2 equiv). Then the reaction mixture was stirred at 100 °C on an oil bath for 15 h. The reaction mixture was diluted with  $\text{H}_2\text{O}$  (30 mL) and extracted with ethyl acetate (10 mL x 3). The combined organic layers dried over  $\text{Na}_2\text{SO}_4$ , concentrated under reduced pressure. The residue was purified by silica gel column chromatography (petroleum ether/ethyl acetate) to afford the desired 3-aminooxetanes **1**.

**N-Phenyloxetan-3-amine (1a)** was prepared according to the General Procedure A as a white solid (chromatography eluent: petroleum ether/ ethyl acetate = 4:1) in 58% yield (335.8 mg).

$^1\text{H NMR}$  (300MHz,  $\text{CDCl}_3$ )  $\delta$  7.23-7.17 (m, 2H), 6.78 (t,  $J = 5.5$  Hz, 1H),

[1] Zhang J.; Hu, X. *Org. Chem. Front.*, **2021**, *8*, 6616-6621.

6.52-6.50 (m, 2H), 5.00 (t,  $J = 4.9$  Hz, 2H), 4.67-4.61 (m, 1H), 4.53 (t,  $J = 4.7$  Hz, 2H) ppm.

***N*-(*p*-Tolyl) oxetan-3-amine (1b)** was prepared according to the General Procedure A as a yellow solid (chromatography eluent: petroleum ether/ ethyl acetate = 4:1) in 26% yield (213.5 mg).

<sup>1</sup>H NMR (300MHz, CDCl<sub>3</sub>)  $\delta$  7.01 (d,  $J = 6.0$  Hz, 2H), 6.46-6.42 (m, 2H), 4.99 (t,  $J = 4.9$  Hz, 2H), 4.64-4.58 (m, 1H), 4.52 (t,  $J = 4.6$  Hz, 2H), 2.25 (s, 3H) ppm.

***N*-(4-Methoxyphenyl) oxetan-3-amine (1c)** was prepared according to the General Procedure A as a brown solid (chromatography eluent: petroleum ether/ethyl acetate = 4:1) in 36% yield (324.3 mg).

<sup>1</sup>H NMR (300MHz, CDCl<sub>3</sub>)  $\delta$  6.80-6.76 (m, 2H), 6.50-6.46 (m, 2H), 4.98 (t,  $J = 4.7$  Hz, 2H), 4.60-4.54 (m, 1H), 4.50 (t,  $J = 4.6$  Hz, 2H) 3.74 (s, 3H) ppm.

***N*-(4-Fluorophenyl) oxetan-3-amine (1d)** was prepared according to the General Procedure A as a yellow solid (chromatography eluent: petroleum ether/ethyl acetate = 4:1) in 42% yield (352.7 mg).

<sup>1</sup>H NMR (300MHz, CDCl<sub>3</sub>)  $\delta$  6.93-6.87 (m, 2H), 6.46-6.41 (m, 2H), 4.99 (t,  $J = 4.7$  Hz, 2H), 4.59-4.53 (m, 1H), 4.50 (t,  $J = 4.6$  Hz, 2H) ppm.

***N*-(4-Chlorophenyl) oxetan-3-amine (1e)** was prepared according to the General Procedure A as a brown solid (chromatography eluent: petroleum ether/ethyl acetate = 4:1) in 49% yield (447.9 mg).

<sup>1</sup>H NMR (300MHz, CDCl<sub>3</sub>)  $\delta$  7.15-7.11 (m, 2H), 6.43-6.40 (m, 2H), 4.99 (t,  $J = 4.8$  Hz, 2H), 4.61-4.55 (m, 1H), 4.50 (t,  $J = 4.6$  Hz, 2H) ppm.

***N*-(*m*-Tolyl) oxetan-3-amine (1f)** was prepared according to the General

Procedure A as a yellow oil (chromatography eluent: petroleum ether/ ethyl acetate = 4:1) in 30% yield (348.2 mg).

<sup>1</sup>H NMR (300MHz, CDCl<sub>3</sub>) δ 7.09 (td, *J* = 5.6, 0.5 Hz, 1H), 6.61 (d, *J* = 5.6 Hz, 1H), 6.34-6.31 (m, 2H), 5.01 (t, *J* = 4.9 Hz, 2H), 4.66-4.60 (m, 1H), 4.53 (t, *J* = 4.6 Hz, 2H), 2.29 (s, 3H) ppm.

***N*-(3-Fluorophenyl) oxetan-3-amine (1g)** was prepared according to the General Procedure A as a white solid (chromatography eluent: petroleum ether/ ethyl acetate = 4:1) in 53% yield (443.6 mg).

<sup>1</sup>H NMR (300MHz, CDCl<sub>3</sub>) δ 7.11 (td, *J* = 6.1, 5.0 Hz, 1H), 6.45 (tdd, *J* = 6.6, 1.8, 0.5 Hz, 1H), 6.27 (ddd, *J* = 6.1, 1.6, 0.5 Hz, 1H), 6.17 (dt, *J* = 8.4, 1.7 Hz, 1H), 5.00 (t, *J* = 4.8 Hz, 2H), 4.62-4.56 (m, 1H), 4.52 (t, *J* = 5.1 Hz, 2H) ppm.

***N*-(3-Chlorophenyl) oxetan-3-amine (1h)** was prepared according to the General Procedure A as a yellow solid (chromatography eluent: petroleum ether/ethyl acetate = 4:1) in 52% yield (476.6 mg).

<sup>1</sup>H NMR (300MHz, CDCl<sub>3</sub>) δ 7.09 (t, *J* = 6.0 Hz, 1H), 6.73 (ddd, *J* = 5.9, 1.2, 0.6 Hz, 1H), 6.45 (t, *J* = 1.6 Hz, 1H), 6.37 (ddd, *J* = 6.1, 1.7, 0.5 Hz, 1H), 5.00 (t, *J* = 4.9 Hz, 2H), 4.62-4.56 (m, 1H), 4.51 (t, *J* = 4.6 Hz, 2H) ppm.

***N*-(4-Bromo-3,5-dimethylphenyl) oxetan-3-amine(1i)** was prepared according to the General Procedure A as a yellow solid (chromatography eluent: petroleum ether/ethyl acetate = 4:1) in 59% yield (755.6 mg).

<sup>1</sup>H NMR (300MHz, CDCl<sub>3</sub>) δ 6.25 (s, 2H), 4.99 (t, *J* = 4.9 Hz, 2H), 4.61-4.55 (m, 1H), 4.49 (t, *J* = 4.6 Hz, 2H), 2.33 (s, 6H) ppm.

## General Procedure B: Preparation of the 2-Alkylidenetrimethylenes 5.<sup>[2]</sup>

---

[2] Zhang, S.; Zhang, L. *Org. Lett.* **2021**, *23*, 15, 5719-5723.

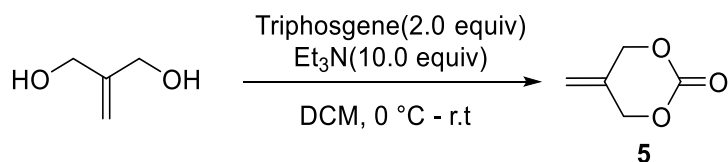

Under N<sub>2</sub> atmosphere at 0 °C, to a solution of 2-methylenepropane-1,3-diol (1.14 g, 10.0 mmol, 1.0 equiv) and Et<sub>3</sub>N (13.8 mL, 10.0 equiv) in DCM (40 mL) was added dropwise triphosgene (50 mL, 2.5 M in DCM, 2.0 equiv). Then the reaction mixture was stirred at room temperature for 1 h. The reaction mixture was quenched in an ice bath with saturated ammonium chloride solution and extracted with DCM (30 mL × 3). The combined organic layers were washed with water, dried over anhydrous Na<sub>2</sub>SO<sub>4</sub>, and concentrated under reduced pressure. The residue was purified by silica gel column chromatography (petroleum ether/ethyl acetate= 4:1) to afford **5** in 57% yield (656 mg).

<sup>1</sup>H NMR (300MHz, CDCl<sub>3</sub>) δ 5.31 (s, 2H), 4.85 (s, 4H) ppm.

Substrates **2a-2m** are known compounds, were synthesized according to the literature procedure.<sup>[3]</sup>

---

[3] a) Ke, M.; Chen, F. *Org. Lett.* **2020**, *22*, 11, 4135-4140; b) Huang, Q.; Li, J. *ACS Catal.* **2021**, *11*, 16, 10148-10158; c) Ajmal K.; Zhang, Y. *Angew. Chem. Int. Ed.* **2014**, *53*, 6439-6442.

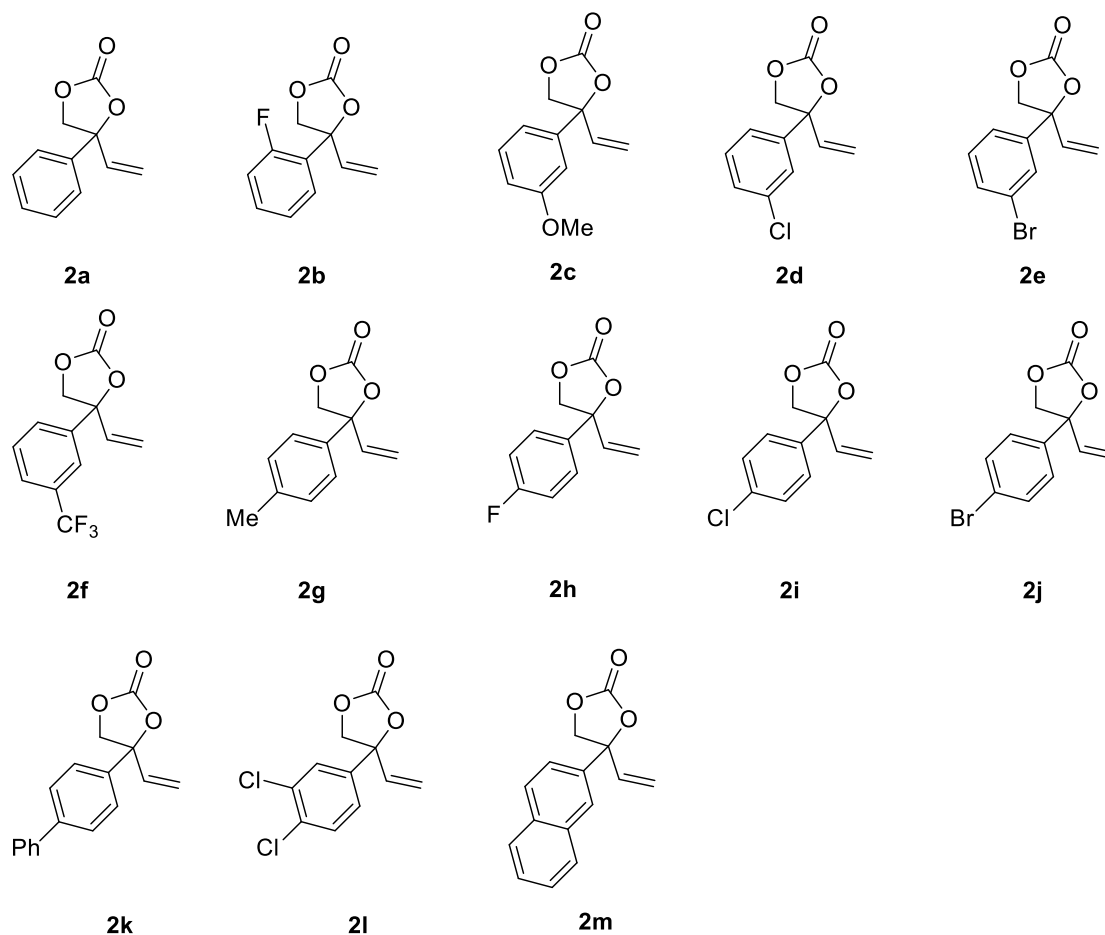

### General Procedure C: Preparation of the Substituted Vinyl ethylene Carbonates (VECs) **2**.

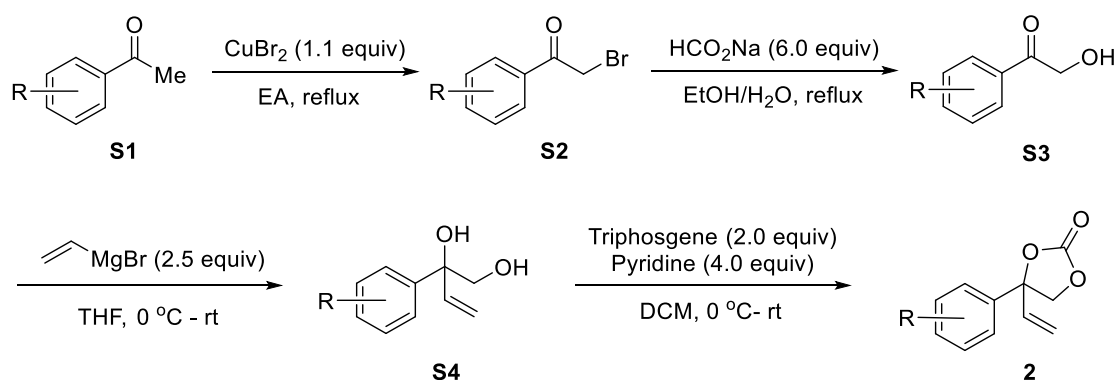

Under  $\text{N}_2$  atmosphere, to a solution of acetophenones **S1** (5.00 mmol, 1.0 equiv) in ethyl acetate (15 mL) was added copper (II) bromide (1.23 g, 5.50 mmol, 1.1 equiv). The reaction mixture was warmed up to reflux and kept stirring for 5 h. Then the mixture was filtered through Celite, and the filter

cake was washed with ethyl acetate. Subsequently, the combined filtrates were concentrated under reduced pressure, then the residue was washed with diethyl ether to afford crude products **S2**.

Under an N<sub>2</sub> atmosphere, to a solution of **S2** (5.0 mmol, 1.0 equiv) in 85% of ethanol (15 mL) was added sodium formate (2.04g, 30.0 mmol). The reaction mixture was warmed up to reflux and kept stirring for 12 h. Then the reaction was quenched with H<sub>2</sub>O (30 mL) and extracted with ethyl acetate (50 mL × 3). The combined organic extracts were washed with brine, dried over Na<sub>2</sub>SO<sub>4</sub>, concentrated under reduced pressure to afford crude products **S3**.

Under N<sub>2</sub> atmosphere at 0 °C, to a solution of **S3** (5.0 mmol, 1.0 equiv) in THF (20 mL) was added vinylmagnesium bromide (20 mL, 1.0 M in THF, 2.5 equiv). Then the reaction was stirred at room temperature for 3 h. The reaction was quenched by aq. NH<sub>4</sub>Cl (15 mL) at 0 °C, and extracted with ethyl acetate (10 mL × 3). The combined organic phases were dried over Na<sub>2</sub>SO<sub>4</sub>, concentrated under reduced pressure. Then the residue was purified by silica gel column chromatography (petroleum ether/ethyl acetate) to afford the desired products **S4**.

Under N<sub>2</sub> atmosphere at 0 °C, to a solution of **S4** (5.0 mmol, 1.0 equiv) and triphosgene (10 mmol, 2.97 g 2.0 equiv) in DCM (15 mL) was added pyridine (1.6 mL, 20 mmol, 4.0 equiv). Then the reaction was stirred at room temperature for 10 h. The reaction was quenched by aq. NH<sub>4</sub>Cl (15 mL) and extracted with DCM (10 mL × 3). Then organic phase was dried over Na<sub>2</sub>SO<sub>4</sub>, concentrated under reduced pressure. Then the residue was purified by silica gel column chromatography (petroleum ether/ethyl acetate) to afford the desired products **2**.

**4-Phenyl-4-vinyl-1,3-dioxolan-2-one (2a)** was prepared according to the General Procedure C as a light yellow oil (chromatography eluent: petroleum ether/ethyl acetate = 10:1) in 83% yield (789.3 mg).



<sup>1</sup>H NMR (400MHz, CDCl<sub>3</sub>) δ 7.44-7.35 (m, 5H), 6.16 (dd, *J* = 17.2, 10.7 Hz, 1H), 5.43 (s, 1H), 5.39 (d, *J* = 6.2 Hz, 1H), 4.66 (d, *J* = 8.5 Hz, 1H), 4.57 (d, *J* = 8.5 Hz, 1H) ppm.

**4-(2-Fluorophenyl)-4-vinyl-1,3-dioxolan-2-one (2b)** was prepared according to the General Procedure C as a light yellow oil (chromatography eluent: petroleum ether/ethyl acetate = 10:1) in 20.5% yield (213.4 mg).

<sup>1</sup>H NMR (400MHz, CDCl<sub>3</sub>) δ 7.55 (td, *J* = 7.7, 1.7 Hz, 1H), 7.41-7.35 (m, 1H), 7.22 (td, *J* = 7.6, 1.1 Hz, 1H), 7.11 (ddd, *J* = 11.1, 8.2, 1 Hz, 1H), 6.17 (ddd, *J* = 17.1, 10.6, 1.3 Hz, 1H), 5.40 (dd, *J* = 17.1, 1.2 Hz, 1H), 5.35 (d, *J* = 10.6 Hz, 1H), 4.74 (dd, *J* = 8.8, 2.6 Hz, 1H), 4.59 (dd, *J* = 8.8, 1.6 Hz, 1H)ppm.

**4-(3-Methoxyphenyl)-4-vinyl-1,3-dioxolan-2-one (2c)** was prepared according to the General Procedure C as a light yellow oil (chromatography eluent: petroleum ether/ethyl acetate = 10:1) in 71% yield (781.7 mg).

<sup>1</sup>H NMR (400MHz, CDCl<sub>3</sub>) δ 7.35-7.31 (m, 1H), 6.90-6.88 (m, 3H), 6.13 (dd, *J* = 17.2, 10.7 Hz, 1H), 5.44-5.39 (m, 2H), 4.64 (d, *J* = 8.5 Hz, 1H), 4.55 (d, *J* = 8.5 Hz, 1H), 3.81 (s, 3H) ppm.

**4-(3-Chlorophenyl)-4-vinyl-1,3-dioxolan-2-one (2d)** was prepared according to the General Procedure C as a light yellow oil (chromatography eluent: petroleum ether/ethyl acetate = 10:1) in 64% yield (718.8 mg).

<sup>1</sup>H NMR (400MHz, CDCl<sub>3</sub>) δ 7.39-7.23 (m, 4H), 6.12 (dd, *J* = 17.1, 10.8 Hz, 1H), 5.46-5.40 (m, 2H), 4.65 (d, *J* = 8.6 Hz, 1H) 4.54 (d, *J* = 8.5 Hz, 1H) ppm.

**4-(3-Bromophenyl)-4-vinyl-1,3-dioxolan-2-one (2e)** was prepared according to the General Procedure C as a light yellow oil (chromatography eluent: petroleum ether/ethyl acetate = 10:1) in 56% yield (753.4 mg).

<sup>1</sup>H NMR (400MHz, CDCl<sub>3</sub>) δ 7.52-7.50 (m, 2H), 7.33 -7.27 (m, 2H), 6.12 (dd, *J* = 17.1, 10.8 Hz, 1H), 5.46-5.40 (m, 2H), 4.65 (d, *J* = 8.6 Hz, 1H). 4.53 (d, *J* = 8.6 Hz, 1H) ppm.

**4-(3-(Trifluoromethyl)phenyl)-4-vinyl-1,3-dioxolan-2-one(2f)** was prepared according to the General Procedure C as a light yellow oil (chromatography eluent: petroleum ether/ethyl acetate = 10:1) in 72% yield (929.5 mg).

<sup>1</sup>H NMR (400MHz, CDCl<sub>3</sub>) δ 7.66-7.57 (m, 4H), 6.16 (dd, *J* = 17.1, 10.7 Hz, 1H), 5.49-5.42 (m, 2H), 4.71 (d, *J* = 8.6 Hz, 1H), 4.56 (d, *J* = 8.6 Hz, 1H) ppm.

**4-(*p*-Tolyl)-4-vinyl-1,3-dioxolan-2-one (2g)** was prepared according to the General Procedure C as a light yellow oil (chromatography eluent: petroleum ether/ethyl acetate = 10:1) in 65% yield (663.7 mg).

<sup>1</sup>H NMR (400MHz, CDCl<sub>3</sub>) δ 7.25-7.21 (m, 4H), 6.14 (dd, *J* = 17.2, 10.7 Hz, 1H), 5.42-5.38 (m, 2H), 4.63 (d, *J* = 8.5 Hz, 1H), 4.56 (d, *J* = 8.4 Hz, 1H), 2.36 (s, 3H) ppm.

**4-(4-Fluorophenyl)-4-vinyl-1,3-dioxolan-2-one(2h)** was prepared according to the General Procedure C as a light yellow oil (chromatography eluent: petroleum ether/ ethyl acetate = 10:1) in 57% yield (593.3 mg).

<sup>1</sup>H NMR (400MHz, CDCl<sub>3</sub>) δ 7.36-7.33 (m, 2H), 7.14-7.09 (m, 2H), 6.13 (dd, *J* = 17.1, 10.7 Hz, 1H), 5.45-5.38 (m, 2H), 4.64 (d, *J* = 8.6 Hz, 1H), 4.55 (d, *J* = 8.5 Hz, 1H) ppm.

**4-(4-Chlorophenyl)-4-vinyl-1,3-dioxolan-2-one(2i)** was prepared according to the General Procedure C as a light yellow oil (chromatography eluent: petroleum ether/ethyl acetate = 10:1) in 62% yield (696.3 mg).

<sup>1</sup>H NMR (400MHz, CDCl<sub>3</sub>) δ 7.41-7.39 (m, 2H), 7.31-7.29 (m, 2H), 6.12 (dd, (dd, J = 17.1, 10.7 Hz, 1H), 5.45-5.38 (m, 2H), 4.64 (d, J = 8.6 Hz, 1H), 4.53 (d, J = 8.6 Hz, 1H) ppm.

**4-(4-Bromophenyl)-4-vinyl-1,3-dioxolan-2-one(2j)** was prepared according to the General Procedure C as a light yellow oil (chromatography eluent: petroleum ether/ethyl acetate = 10:1) in 53% yield (707.8 mg).

<sup>1</sup>H NMR (400MHz, CDCl<sub>3</sub>) δ 7.56 (d, J = 8.5 Hz, 2H), 7.24 (d, J = 8.5 Hz, 2H), 6.12 (dd, J = 17.1, 10.7 Hz, 1H), 5.45-5.38 (m, 2H), 4.64 (d, J = 8.5 Hz, 1H), 4.53 (d, J = 8.6 Hz, 1H) ppm.

**4-([1,1'-Biphenyl]-4-yl)-4-vinyl-1,3-dioxolan-2-one(2k)** was prepared according to the General Procedure C as a white solid (chromatography eluent: petroleum ether/ethyl acetate = 10:1) in 45.7% yield (608.7 mg).

<sup>1</sup>H NMR (400MHz, CDCl<sub>3</sub>) δ 7.65 (d, J = 8.4 Hz, 2H), 7.59 (d, J = 7.3 Hz, 2H), 7.48-7.37 (m, 5H), 6.20 (dd, J = 17.1, 10.7 Hz, 1H), 5.49-5.44 (m, 2H), 4.69 (d, J = 8.5 Hz, 1H), 4.62 (d, J = 8.5 Hz, 1H) ppm.

**4-(3,4-Dichlorophenyl)-4-vinyl-1,3-dioxolan-2-one(2l)** was prepared according to the General Procedure C as a light yellow oil (chromatography eluent: petroleum ether/ethyl acetate = 10:1) in 55% yield (706.9 mg).

<sup>1</sup>H NMR (400MHz, CDCl<sub>3</sub>) δ 7.51-7.46 (m, 2H), 7.20 (dd, J = 8.4, 2.1 Hz, 1H), 6.10 (dd, J = 17.1, 10.7 Hz, 1H), 5.48-5.40 (m, 2H), 4.65 (d, J = 8.6 Hz, 1H), 4.52 (d, J = 8.6 Hz, 1H) ppm.

**4-(Naphthalen-2-yl)-4-vinyl-1,3-dioxolan-2-one(2m)** was prepared according to the General Procedure C as a brown solid (chromatography eluent: petroleum ether/ethyl acetate = 10:1) in 87% yield (1.05 g).

$^1\text{H NMR}$  (400MHz,  $\text{CDCl}_3$ )  $\delta$  7.92-7.84 (m, 4H), 7.56-7.52 (m, 2H), 7.39 (dd,  $J = 8.6, 1.8$  Hz, 1H), 6.24 (dd,  $J = 17.2, 10.7$  Hz, 1H), 5.48-5.44 (m, 2H), 4.73 (d,  $J = 8.5$  Hz, 1H), 4.68 (d,  $J = 8.5$  Hz, 1H) ppm.

### III. The Optimization of Reaction Conditions for 1,4-Oxazepanes

**Table S1.** The Optimization of Reaction Conditions for 1,4-Oxazepanes.

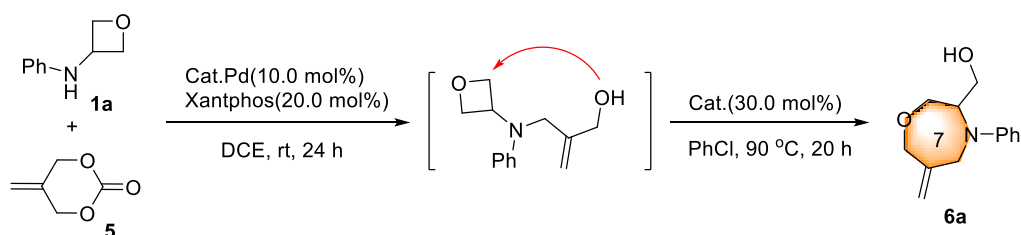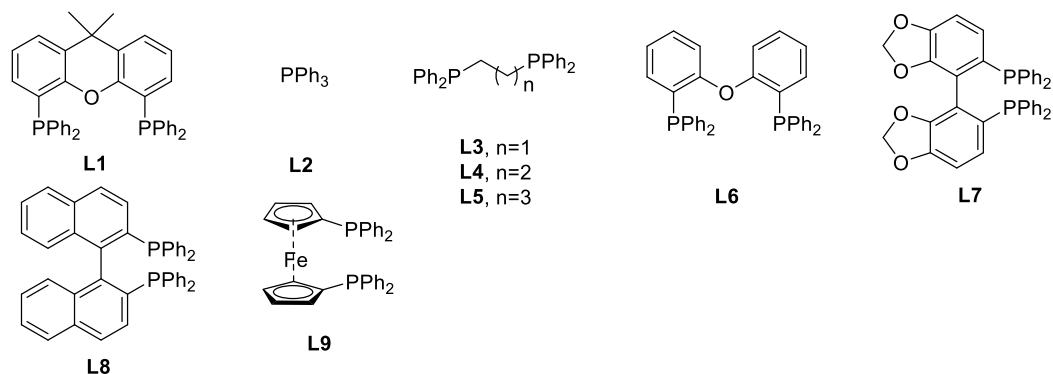

| Entry | Cat. Pd                            | L  | Cat.                                           | Yield of 7a <sup>b</sup> | Yield of 6a <sup>c</sup> |
|-------|------------------------------------|----|------------------------------------------------|--------------------------|--------------------------|
| 1     | Pd(OAc) <sub>2</sub>               | L1 | --                                             | 85%                      | --                       |
| 2     | PdCl <sub>2</sub>                  | L1 | --                                             | <10%                     | --                       |
| 3     | Pd(PPh <sub>3</sub> ) <sub>4</sub> | L1 | --                                             | 72%                      | --                       |
| 4     | Pd <sub>2</sub> dba <sub>3</sub>   | L1 | --                                             | 68%                      | --                       |
| 5     | Pd(OAc) <sub>2</sub>               | L2 | --                                             | NR                       | --                       |
| 6     | Pd(OAc) <sub>2</sub>               | L3 | --                                             | NR                       | --                       |
| 7     | Pd(OAc) <sub>2</sub>               | L4 | --                                             | NR                       | --                       |
| 8     | Pd(OAc) <sub>2</sub>               | L5 | --                                             | NR                       | --                       |
| 9     | Pd(OAc) <sub>2</sub>               | L6 | --                                             | 32%                      | --                       |
| 10    | Pd(OAc) <sub>2</sub>               | L7 | --                                             | <10%                     | --                       |
| 11    | Pd(OAc) <sub>2</sub>               | L8 | --                                             | <10%                     | --                       |
| 12    | Pd(OAc) <sub>2</sub>               | L9 | --                                             | NR                       | --                       |
| 15    | Pd(OAc) <sub>2</sub>               | L1 | B(C <sub>6</sub> F <sub>5</sub> ) <sub>3</sub> | --                       | 41%                      |
| 16    | Pd(OAc) <sub>2</sub>               | L1 | (PhO) <sub>2</sub> PO <sub>2</sub> H           | --                       | 55%                      |
| 17    | Pd(OAc) <sub>2</sub>               | L1 | TFA                                            | --                       | ND                       |
| 18    | Pd(OAc) <sub>2</sub>               | L1 | TsOH                                           | --                       | ND                       |

<sup>a</sup> Reaction conditions: **1a** (0.2 mmol), **5** (0.3 mmol), Cat. Pd (0.01 mmol, 10.0 mol%) and **L** (0.04 mmol, 20.0 mol%) in DCE (2.0 mL) at rt for 24 h; then Cat. (0.06 mmol, 30.0 mol%) in PhCl (3.0

mL) at 90 °C for 20 h; NR = No Reaction; ND = Not determined. <sup>b</sup> Yield was determined based on crude NMR analysis using CH<sub>2</sub>Br<sub>2</sub> as internal standard. <sup>c</sup> Total isolated yield.

#### IV. Synthesis of Medium-sized Heterocycles

##### General Procedure D: The synthesis of tetrahydro-2H-1,4-oxazocines **4**.

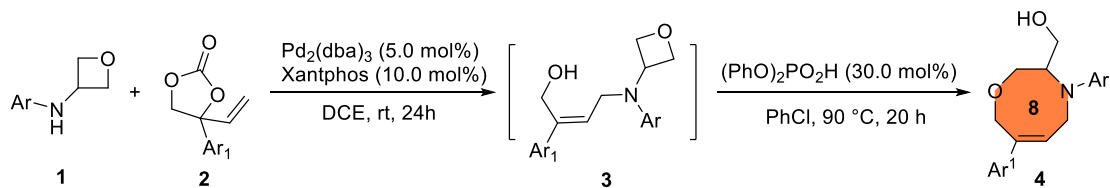

Under N<sub>2</sub> atmosphere, the solution of 3-aminooxetanes **1** (0.2 mmol, 1.0 equiv), vinyl ethylene carbonate **2** (0.6 mmol, 3.0 equiv) and Xantphos (11.6 mg, 0.02 mmol, 10.0 mol%) in DCE (2.0 mL) was added Pd<sub>2</sub>(dba)<sub>3</sub> (9.2 mg, 0.01 mmol, 5.0 mol%). Then the reaction mixture was stirred at room temperature for 24 h. The reaction mixture was filtrated through a short column to remove the polar impurities and concentrated to afford crude products **3**. Then the crude products **3** was added to the solution of (PhO)<sub>2</sub>PO<sub>2</sub>H (15.0 mg, 0.06 mmol, 30 mol%) in PhCl (3.0 mL). The reaction mixture was stirred at 90 °C for 20 h, then concentrated under reduced pressure. The residue was purified by silica gel column chromatography (petroleum ether/ethyl acetate) to afford the desired products **4**.

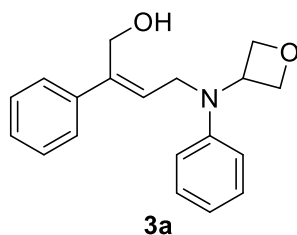

##### (Z)-4-(Oxetan-3-yl(phenyl)amino)-2-phenylbut-2-en-1-ol (**3a**):

<sup>1</sup>H NMR (400 MHz, CDCl<sub>3</sub>) δ 7.38-7.23 (m, 7H), 6.88 (t, *J* = 7.3 Hz, 1H), 6.72 (m, 2H), 5.85 (t, *J* = 6.5 Hz, 1H), 4.87-4.82(m, 2H), 4.74-4.69 (m, 3H), 4.55 (s, 2H), 4.15 (d, *J* = 6.5 Hz, 2H) ppm.

<sup>13</sup>C NMR (400 MHz, CDCl<sub>3</sub>) δ 148.3, 141.6, 140.2, 129.5, 128.7, 128.3, 127.8, 126.5, 120.4, 117.0, 76.5, 59.9, 53.7, 47.9 ppm.

HRMS (ESI) *m/z*: [M + Na]<sup>+</sup> calcd for C<sub>19</sub>H<sub>21</sub>NO<sub>2</sub>Na: 318.1470; found 318.1465.

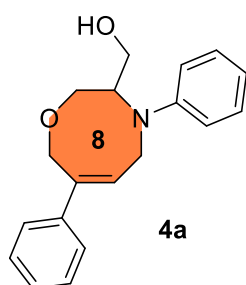

**(Z)-(4,7-Diphenyl-3,4,5,8-tetrahydro-2H-1,4-oxazocin-3-yl) methanol (4a)** was prepared according to the General Procedure D as a yellow oil (chromatography eluent: petroleum ether/ ethyl acetate = 3:1) in 72% yield (42.5 mg).

$^1\text{H NMR}$  (400 MHz,  $d_6$ -Acetone)  $\delta$  7.35-7.29 (m, 4H), 7.26-7.22 (m, 1H), 7.20-7.15 (m, 2H), 6.88 (d,  $J = 8$  Hz, 2H), 6.63 (tt,  $J = 7.2, 0.9$  Hz, 1H), 6.31 (t,  $J = 5.7$  Hz, 2H), 4.59 (dd,  $J = 5.7, 17.6$  Hz, 1H), 4.53 (s, 2H), 4.21 (dd,  $J = 12.4, 5.7$  Hz, 1H), 4.03-3.93 (m, 2H), 3.81-3.76 (m, 3H) ppm.

$^{13}\text{C NMR}$  (400 MHz,  $d_6$ -Acetone)  $\delta$  150.2, 143.5, 138.8, 129.9 (2C), 129.1, 127.8, 126.8, 117.1, 113.3, 70.1, 67.5, 60.5, 59.9, 44.5 ppm.

**HRMS** (ESI)  $m/z$ :  $[\text{M} + \text{Na}]^+$  calcd for  $\text{C}_{19}\text{H}_{21}\text{NO}_2\text{Na}$ : 318.1470; found 318.1463.

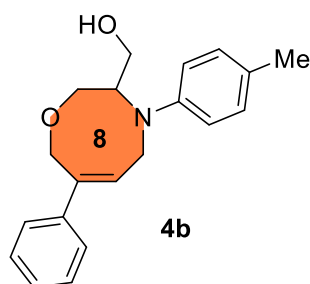

**(Z)-(7-Phenyl-4-(p-tolyl)-3,4,5,8-tetrahydro-2H-1,4-oxazocin-3-yl) methanol (4b)** was prepared according to the General Procedure D as a yellow oil (chromatography eluent: petroleum ether/ ethyl acetate = 3:1) in 61% yield (37.3 mg).

$^1\text{H NMR}$  (400 MHz,  $d_6$ -Acetone)  $\delta$  7.35 - 7.24 (m, 5H), 6.99 (d,  $J = 8.3$  Hz, 2H), 6.77 (d,  $J = 8.6$  Hz, 2H), 6.28 (t,  $J = 5.2$  Hz, 1H), 4.57 - 4.51 (m, 3H), 4.17 (dd,  $J =$



12.4, 5.9 Hz, 1H), 3.98 - 3.89 (m, 2H), 3.81 - 3.73 (m, 3H), 2.18 (s, 3H) ppm.

$^{13}\text{C}$  NMR (400 MHz,  $d_6$ -Acetone)  $\delta$  148.2, 143.7, 138.6, 130.52, 130.51, 129.2, 127.9, 126.9, 126.0, 113.6, 70.0, 67.4, 60.7, 60.4, 45.0, 20.3 ppm.

HRMS (ESI)  $m/z$ :  $[\text{M} + \text{Na}]^+$  calcd for  $\text{C}_{20}\text{H}_{23}\text{NO}_2\text{Na}$  calcd.: 332.1598; found: 332.1617.

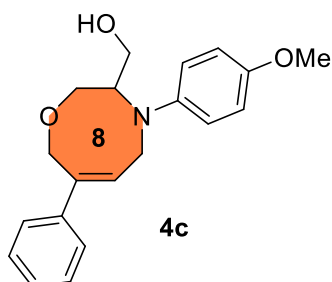

**(Z)-4-(4-Methoxyphenyl)-7-phenyl-3,4,5,8-tetrahydro-2H-1,4-oxazocin-3-yl methanol (4c)** was prepared according to the General Procedure D as a yellow oil (chromatography eluent: petroleum ether/ethyl acetate = 3:1) in 47% yield (30.5 mg).

$^1\text{H}$  NMR (400 MHz,  $d_6$ -Acetone)  $\delta$  7.35-7.24 (m, 5H), 7.85-6.79 (m, 4H), 6.26 (t,  $J$  = 5.4 Hz, 1H), 4.60-4.47 (m, 3H), 4.14 (dd,  $J$  = 12.2, 5.8 Hz, 1H), 3.95-3.83 (m, 2H), 3.82-3.72 (m, 3H), 3.69 (s, 3H) ppm.

$^{13}\text{C}$  NMR (400 MHz,  $d_6$ -Acetone)  $\delta$  152.6, 144.9, 143.8, 138.6, 130.8, 129.2, 127.9, 126.9, 115.6, 115.2, 69.9, 67.5, 61.0, 60.9, 55.8, 45.6 ppm.

HRMS (ESI)  $m/z$ :  $[\text{M} + \text{Na}]^+$  calcd for  $\text{C}_{20}\text{H}_{23}\text{NO}_3\text{Na}$  calcd.: 348.1598; found: 348.1566.

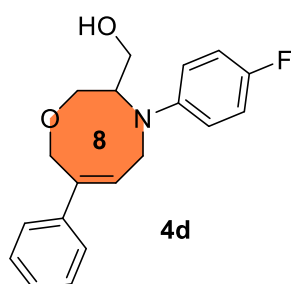

**(Z)-4-(4-Fluorophenyl)-7-phenyl-3,4,5,8-tetrahydro-2H-1,4-oxazocin-3-yl**

**methanol (4d)** was prepared according to the General Procedure D as a yellow oil (chromatography eluent: petroleum ether/ethyl acetate = 3:1) in 71% yield (44.5 mg).

$^1\text{H NMR}$  (400 MHz,  $\text{CDCl}_3$ )  $\delta$  7.35 - 7.23 (m, 5H), 6.97 - 6.91 (m, 2H), 6.86 - 6.82 (m, 2H), 6.21 (t,  $J = 6.6$  Hz, 1H), 4.67 (d,  $J = 15.7$  Hz, 1H), 4.57 (dd,  $J = 16.6, 6.9$  Hz, 1H), 4.42 (d,  $J = 15.7$  Hz, 1H), 4.15 (dd,  $J = 12.3, 3.8$  Hz, 1H), 3.91 - 3.75 (m, 5H) ppm.

$^{13}\text{C NMR}$  (400 MHz,  $\text{CDCl}_3$ )  $\delta$  155.9(d,  $J = 237.4$  Hz), 146.1 (d,  $J = 1.7$  Hz), 141.7, 139.8, 128.5, 127.6, 127.5, 126.3, 115.9 (d,  $J = 22.3$  Hz), 114.9 (d,  $J = 7.3$  Hz), 71.1, 68.1, 60.6, 59.2, 43.3 ppm.

$^{19}\text{F NMR}$  (282MHz,  $\text{CDCl}_3$ )  $\delta$  -127.6 ppm.

**HRMS** (ESI)  $m/z$ :  $[\text{M} + \text{Na}]^+$  calcd for  $\text{C}_{19}\text{H}_{20}\text{FNO}_2\text{Na}$  calcd.: 336.1376; found: 336.1368.

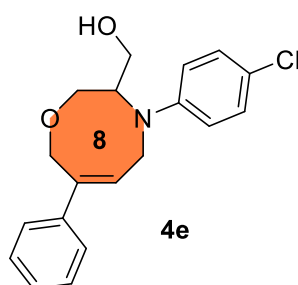

**(Z)-4-(4-Chlorophenyl)-7-phenyl-3,4,5,8-tetrahydro-2H-1,4-oxazocin-3-ylmethanol (4e)** was prepared according to the General Procedure D as a yellow oil (chromatography eluent: petroleum ether/ethyl acetate = 3:1) in 70% yield (45.9 mg).

$^1\text{H NMR}$  (400 MHz,  $\text{CDCl}_3$ )  $\delta$  7.32 7.22 (m, 5H), 7.16 (d,  $J = 8.9$  Hz, 2H), 6.81 (d,  $J = 8.8$  Hz, 2H), 6.22 (t,  $J = 6.6$  Hz, 1H), 4.70 - 4.38 (m, 3H), 4.16 (dd,  $J = 12.2, 3.3$  Hz, 1H), 3.90 - 3.73 (m, 5H) ppm.

$^{13}\text{C NMR}$  (400 MHz,  $d_6$ -Acetone)  $\delta$  149.1, 143.2, 139.5, 129.60, 129.1, 129.0, 128.0, 126.9, 121.1, 114.7, 70.5, 67.9, 60.5, 59.9, 44.3 ppm.

**HRMS** (ESI)  $m/z$ :  $[\text{M} + \text{Na}]^+$  calcd for  $\text{C}_{19}\text{H}_{20}\text{ClNO}_2 \text{Na}$  calcd.: 352.1081; found:

352.1081.

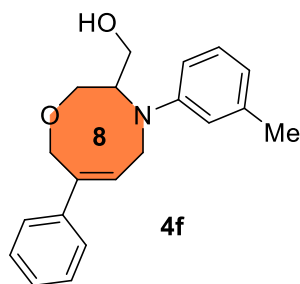

**(Z)-(7-Phenyl-4-(m-tolyl)-3,4,5,8-tetrahydro-2H-1,4-oxazocin-3-yl) methanol (4f)** was prepared according to the General Procedure D as a yellow oil (chromatography eluent: petroleum ether/ethyl acetate = 3:1) in 53% yield (32.8 mg).

$^1\text{H NMR}$  (400 MHz,  $d_6$ -Acetone)  $\delta$  7.35-7.23 (m, 5H), 7.05 (t,  $J = 7.8$  Hz, 1H), 6.71 (s, 1H), 6.67 (dd,  $J = 8.3, 2.3$  Hz, 1H), 6.46 (d,  $J = 7.4$  Hz, 1H), 6.30 (t,  $J = 5.6$  Hz, 1H), 4.59-4.52 (m, 3H), 4.20 (dd,  $J = 12.4, 5.8$  Hz, 1H), 3.99-3.93 (m, 2H), 3.81-3.74 (m, 3H), 2.25 (s, 3H) ppm.

$^{13}\text{C NMR}$  (400 MHz,  $d_6$ -Acetone)  $\delta$  150.3, 143.6, 139.3, 138.7, 130.2, 129.9, 129.2, 127.9, 126.9, 118.2, 114.1, 110.7, 70.0, 67.5, 60.5, 60.0, 44.7, 22.0 ppm.

**HRMS** (ESI)  $m/z$ :  $[\text{M} + \text{Na}]^+$  calcd for  $\text{C}_{20}\text{H}_{23}\text{NO}_2\text{Na}$  calcd.: 332.1598; found: 332.1618.

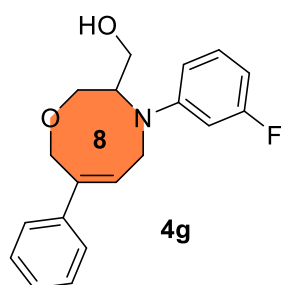

**(Z)-(4-(3-Fluorophenyl)-7-phenyl-3,4,5,8-tetrahydro-2H-1,4-oxazocin-3-yl) methanol (4g)** was prepared according to the General Procedure D as a yellow oil (chromatography eluent: petroleum ether/ethyl acetate = 3:1) in 63% yield (39.4 mg).

$^1\text{H}$  NMR (400 MHz,  $\text{CDCl}_3$ )  $\delta$  7.24 - 7.14 (m, 5H), 7.06 (q,  $J$  = 8.0 Hz, 1H), 6.56 - 6.47 (m, 2H), 6.33 (t,  $J$  = 6.7 Hz, 1H), 6.16 (t,  $J$  = 6.6 Hz, 1H), 4.63-4.30 (m, 3H), 4.10 (dd,  $J$  = 12.2, 3.1 Hz, 1H), 3-81-3.64 (m, 5H) ppm.

$^{13}\text{C}$  NMR (400 MHz,  $d_6$ -Acetone)  $\delta$  165.0 (d,  $J$  = 240.4 Hz), 152.2 (d,  $J$  = 10.8 Hz), 143.1, 139.6, 131.2 (d,  $J$  = 10.5 Hz), 129.2, 128.8, 128.0, 126.9, 109.1 (d,  $J$  = 2.0 Hz), 103.1 (d,  $J$  = 21.8 Hz), 100.0 (d,  $J$  = 26.4 Hz), 70.6, 68.0, 60.4, 59.9, 44.1 ppm.

$^{19}\text{F}$  NMR (282MHz,  $\text{CDCl}_3$ )  $\delta$  -113.9 ppm.

HRMS (ESI)  $m/z$ :  $[\text{M} + \text{Na}]^+$  calcd for  $\text{C}_{19}\text{H}_{20}\text{FNO}_2\text{Na}$  calcd.: 336.1398; found: 336.1371.

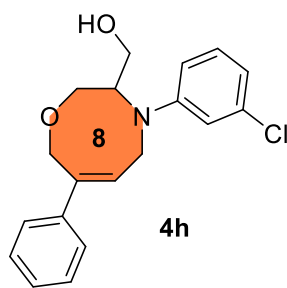

**(Z)-4-(3-Chlorophenyl)-7-phenyl-3,4,5,8-tetrahydro-2H-1,4-oxazocin-3-yl**

**methanol (4h)** was prepared according to the General Procedure D as a yellow oil (chromatography eluent: petroleum ether/ethyl acetate = 3:1) in 68% yield (44.8 mg).

$^1\text{H}$  NMR (400 MHz,  $d_6$ -Acetone)  $\delta$  7.35-7.23 (m, 5H), 7.15 (t,  $J$  = 8.2 Hz, 1H), 6.88 (t,  $J$  = 2.2 Hz, 1H), 6.84 (dd,  $J$  = 8.4, 2.4 Hz, 1H), 6.62 (dd,  $J$  = 7.8, 1.2 Hz, 1H), 6.32 (t,  $J$  = 6.1 Hz, 1H), 4.68-4.46 (m, 3H), 4.22 (dd,  $J$  = 12.4, 5.0 Hz, 1H), 3.97-3.92 (m, 2H), 3.80-3.76 (m, 3H) ppm.

$^{13}\text{C}$  NMR (400 MHz,  $d_6$ -Acetone)  $\delta$  151.6, 143.2, 139.8, 135.5, 131.2, 129.2, 128.7, 128.1, 127.0, 116.6, 112.9, 111.9, 70.7, 68.1, 60.4, 59.8, 44.1 ppm.

HRMS (ESI)  $m/z$ :  $[\text{M} + \text{Na}]^+$  calcd for  $\text{C}_{19}\text{H}_{20}\text{ClNO}_2\text{Na}$  calcd.: 352.1098; found: 352.1076.

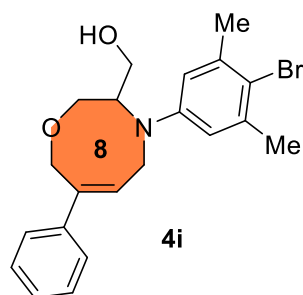

**(Z)-4-(4-Bromo-3,5-dimethylphenyl)-7-phenyl-3,4,5,8-tetrahydro-2H-1,4-oxazocin-3-yl) methanol (4i)** was prepared according to the General Procedure D as a yellow oil (chromatography eluent: petroleum ether/ethyl acetate = 3:1) in 77% yield (61.9 mg).

$^1\text{H NMR}$  (400 MHz,  $d_6$ -Acetone)  $\delta$  7.34-7.23 (m, 5H), 6.72 (s, 2H), 6.30 (t,  $J$  = 5.9 Hz, 1H), 4.59-4.47 (m, 3H), 4.19 (dd,  $J$  = 12.4, 5.4 Hz, 1H), 3.97-3.92 (m, 2H), 3.79-3.74 (m, 3H), 2.31 (s, 6H) ppm.

$^{13}\text{C NMR}$  (400 MHz,  $d_6$ -Acetone)  $\delta$  148.9, 143.2, 139.1, 138.8, 129.3, 129.1, 127.9, 126.8, 113.9, 113.5, 70.3, 67.6, 60.3, 59.6, 44.2, 24.2 ppm.

**HRMS** (ESI)  $m/z$ :  $[\text{M} + \text{Na}]^+$  calcd for  $\text{C}_{21}\text{H}_{24}\text{BrNO}_2$  Na calcd.: 424.0888; found: 424.0886.

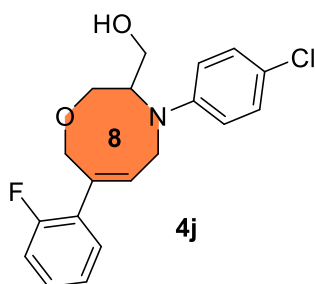

**(Z)-4-(4-Chlorophenyl)-7-(2-fluorophenyl)-3,4,5,8-tetrahydro-2H-1,4-oxazocin-3-yl) methanol (4j)** was prepared according to the General Procedure D as a yellow oil (chromatography eluent: petroleum ether/ethyl acetate = 3:1) in 64% yield (44.5 mg).

$^1\text{H NMR}$  (400 MHz,  $d_6$ -Acetone)  $\delta$  7.34-7.24 (m, 2H), 7.17-7.07 (m, 4H), 6.89 (d,  $J$  = 8.9 Hz, 2H), 6.23 (t,  $J$  = 6.0 Hz, 1H), 4.64 (dd,  $J$  = 17.2, 6.3 Hz, 1H), 4.42 (dd,  $J$  = 68.1, 15.4 Hz, 2H), 4.22 (dd,  $J$  = 12.4, 4.6 Hz, 1H), 3.94-3.88 (m, 2H), 3.81-3.78

(m, 3H) ppm.

$^{13}\text{C}$  NMR (400 MHz,  $d_6$ -Acetone)  $\delta$  160.5 (d,  $J = 245.5$  Hz), 149.0, 136.2, 131.6, 131.2 (d,  $J = 4.2$  Hz), 130.7, 130.1 (d,  $J = 8.2$  Hz), 129.6, 125.3 (d,  $J = 3.4$  Hz), 121.1, 116.3 (d,  $J = 22.5$  Hz), 114.7, 71.0 (d,  $J = 3.8$  Hz), 68.2, 60.4, 59.6, 43.8 ppm.

$^{19}\text{F}$  NMR (282MHz,  $\text{CDCl}_3$ )  $\delta$  -115.4 ppm.

HRMS (ESI)  $m/z$ :  $[\text{M} + \text{H}]^+$  calcd for  $\text{C}_{19}\text{H}_{19}\text{ClFNO}_2\text{H}$  calcd.: 348.1167; found: 348.1162.

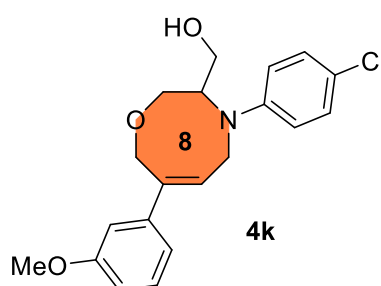

**(Z)-4-(4-Chlorophenyl)-7-(3-methoxyphenyl)-3,4,5,8-tetrahydro-2H-1,4-oxazin-3-yl methanol (4k)** was prepared according to the General Procedure D as a yellow oil (chromatography eluent: petroleum ether/ethyl acetate = 3:1) in 74% yield (53.2 mg).

$^1\text{H}$  NMR (400 MHz,  $d_6$ -Acetone)  $\delta$  7.23 (t,  $J = 7.9$  Hz, 1H), 7.17-7.13 (m, 2H), 6.91-6.86 (m, 4H), 6.83 (dd,  $J = 8.2, 2.5$  Hz, 1H), 6.32 (t,  $J = 5.8$  Hz, 1H), 4.63 – 4.44 (m, 3H), 4.19 (dd,  $J = 12.4, 5.3$  Hz, 1H), 3.94-3.89 (m, 2H), 3.78-3.74 (m, 6H) ppm.

$^{13}\text{C}$  NMR (400 MHz,  $d_6$ -Acetone)  $\delta$  160.5, 149.0, 144.6, 139.3, 130.1, 129.5, 129.1, 121.0, 119.2, 114.7, 113.2, 112.6, 70.4, 67.8, 60.4, 59.9, 55.3, 44.2 ppm.

HRMS (ESI)  $m/z$ :  $[\text{M} + \text{H}]^+$  calcd for  $\text{C}_{20}\text{H}_{22}\text{ClNO}_3\text{H}$  calcd.: 360.1367; found: 360.1363.

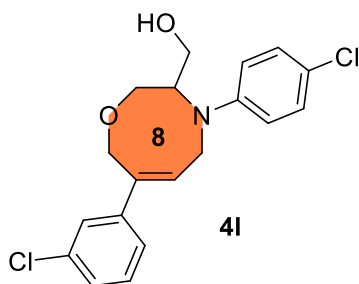

**(Z)-(7-(3-Chlorophenyl)-4-(4-chlorophenyl)-3,4,5,8-tetrahydro-2H-1,4-oxazin-3-yl) methanol (4l)** was prepared according to the General Procedure D as a yellow oil (chromatography eluent: petroleum ether/ethyl acetate = 3:1) in 66% yield (48.0 mg).

$^1\text{H NMR}$  (400 MHz,  $d_6$ -Acetone)  $\delta$  7.37-7.27 (m, 4H), 7.16 (d,  $J = 9.1$  Hz, 2H), 6.89 (d,  $J = 9.1$  Hz, 2H), 6.37 (t,  $J = 5.6$  Hz, 1H), 4.64-4.46 (m, 3H), 4.18 (dd,  $J = 12.6, 5.7$  Hz, 1H), 3.99-3.91 (m, 2H), 3.80-3.75 (m, 3H) ppm.

$^{13}\text{C NMR}$  (400 MHz,  $d_6$ -Acetone)  $\delta$  150.0, 145.5, 137.8, 134.5, 130.9, 130.8, 129.6, 127.8, 126.8, 125.4, 121.2, 144.7, 69.7, 67.5, 60.4, 60.1, 44.5 ppm.

**HRMS** (ESI)  $m/z$ :  $[\text{M} + \text{H}]^+$  calcd for  $\text{C}_{19}\text{H}_{19}\text{Cl}_2\text{NO}_2\text{H}$  calcd.: 364.0872; found: 364.0864.

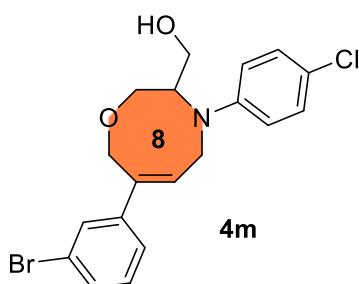

**(Z)-(7-(3-Bromophenyl)-4-(4-chlorophenyl)-3,4,5,8-tetrahydro-2H-1,4-oxazin-3-yl) methanol (4m)** was prepared according to the General Procedure D as a yellow oil (chromatography eluent: petroleum ether/ethyl acetate = 3:1) in 51% yield (41.6 mg).

$^1\text{H NMR}$  (400 MHz,  $d_6$ -Acetone)  $\delta$  7.51 (s, 1H), 7.44 (d,  $J = 7.8$  Hz, 1H), 7.35-7.26 (m, 2H), 7.16 (d,  $J = 8.8$  Hz, 2H), 6.89 (d,  $J = 8.8$  Hz, 2H), 6.36 (t,  $J = 5.4$  Hz, 1H), 4.61 (dd,  $J = 17.7, 5.6$  Hz, 1H), 4.50 (d,  $J = 4.6$  Hz, 2H), 4.18 (dd,  $J = 12.5,$

5.6 Hz, 1H), 3.99-3.93 (m, 2H), 3.81-3.76 (m, 3H) ppm.

<sup>13</sup>C NMR (400 MHz, *d*<sub>6</sub>-Acetone) δ 149.1, 145.9, 137.8, 131.2, 131.1, 130.8, 129.9, 129.7, 125.9, 122.9, 121.3, 114.9, 69.9, 67.6, 60.6, 60.3, 44.7 ppm.

HRMS (ESI) *m/z*: [M + H]<sup>+</sup> calcd for C<sub>19</sub>H<sub>19</sub>BrClNO<sub>2</sub>H calcd.: 408.0367; found: 408.0361.

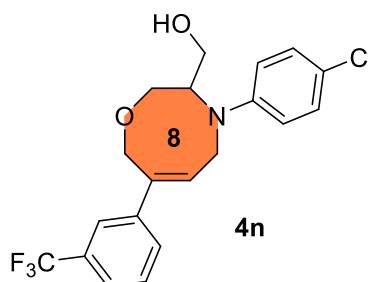

**(Z)-4-(4-Chlorophenyl)-7-(3-(trifluoromethyl)phenyl)-3,4,5,8-tetrahydro-2H-1,4-oxazocin-3-ylmethanol (4n)** was prepared according to the General Procedure D as a yellow oil (chromatography eluent: petroleum ether/ethyl acetate = 3:1) in 51% yield (40.5 mg).

<sup>1</sup>H NMR (400 MHz, *d*<sub>6</sub>-Acetone) δ 7.66-7.55 (m, 4H), 7.16 (d, *J* = 9.0 Hz, 2H), 6.90 (d, *J* = 9.0 Hz, 2H), 6.43 (t, *J* = 5.4 Hz, 1H), 4.63 (dd, *J* = 17.9, 5.4 Hz, 1H), 4.55 (s, 2H), 4.19 (dd, *J* = 12.6, 5.8 Hz, 1H), 4.03-3.93 (m, 2H), 3.84-3.77 (m, 3H) ppm.

<sup>13</sup>C NMR (400 MHz, *d*<sub>6</sub>-Acetone) δ 149.1, 144.6, 137.8, 131.8, 131.1, 130.8, 130.2, 129.7, 125.3 (q, *J* = 273.0 Hz), 124.6 (q, *J* = 3.8 Hz), 123.6 (q, *J* = 3.9 Hz), 121.3, 114.9, 69.7, 67.4, 60.6, 60.4, 44.8 ppm.

<sup>19</sup>F NMR (282MHz, CDCl<sub>3</sub>) δ -62.6 ppm.

HRMS (ESI) *m/z*: [M + H]<sup>+</sup> calcd for C<sub>20</sub>H<sub>19</sub>ClF<sub>3</sub>NO<sub>2</sub>H calcd.: 398.1135; found: 398.1134.



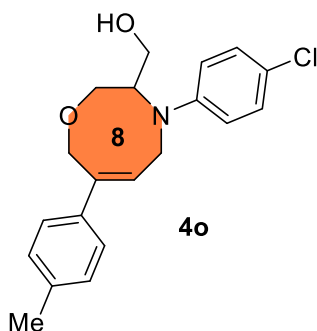

**(Z)-4-(4-Chlorophenyl)-7-(p-tolyl)-3,4,5,8-tetrahydro-2H-1,4-oxazocin-3-yl methanol (4o)** was prepared according to the General Procedure D as a yellow oil (chromatography eluent: petroleum ether/ethyl acetate = 3:1) in 68% yield (46.7 mg).

$^1\text{H NMR}$  (400 MHz,  $d_6$ -Acetone)  $\delta$  7.21 (d,  $J = 8.2$  Hz, 2H), 7.16-7.11 (m, 4H), 6.90-6.86 (m, 2H), 6.27 (t,  $J = 6.0$  Hz, 1H), 4.64-4.42 (m, 3H), 4.20 (dd,  $J = 12.4, 5.0$  Hz, 1H), 3.92-3.87 (m, 2H), 3.78-3.73 (m, 3H), 2.28 (s, 3H) ppm.

$^{13}\text{C NMR}$  (400 MHz,  $d_6$ -Acetone)  $\delta$  149.0, 140.2, 139.4, 137.5, 129.7, 129.5, 128.0, 126.7, 120.9, 114.6, 70.6, 68.0, 60.4, 59.8, 44.0, 20.9 ppm.

**HRMS** (ESI)  $m/z$ :  $[\text{M} + \text{Na}]^+$  calcd for  $\text{C}_{20}\text{H}_{22}\text{ClNO}_2\text{Na}$  calcd.: 366.1198; found: 366.1227.

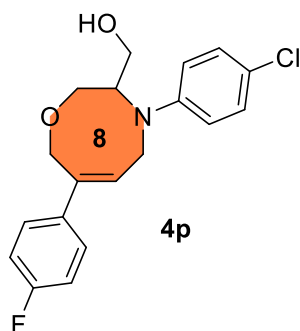

**(Z)-4-(4-Chlorophenyl)-7-(4-fluorophenyl)-3,4,5,8-tetrahydro-2H-1,4-oxazocin-3-yl methanol (4p)** was prepared according to the General Procedure D as a yellow oil (chromatography eluent: petroleum ether/ethyl acetate = 3:1) in 63% yield (43.8 mg).

$^1\text{H NMR}$  (400 MHz,  $d_6$ -Acetone)  $\delta$  7.39-7.34 (m, 2H), 7.17-7.05 (m, 4H), 6.90-6.86 (m, 2H), 6.29 (t,  $J = 5.9$  Hz, 1H), 4.64-4.43 (m, 3H), 4.20 (dd,  $J = 12.5,$

5.3 Hz, 1H), 3.95-3.89 (m, 2H), 3.79-3.74 (m, 3H) ppm.

$^{13}\text{C}$  NMR (400 MHz,  $d_6$ -Acetone)  $\delta$  162.8 (d,  $J = 245.0$  Hz), 149.0, 139.5 (d,  $J = 3.0$  Hz), 138.4, 129.5, 129.2, 128.8 (d,  $J = 8.1$  Hz), 121.0, 115.8 (d,  $J = 21.5$  Hz), 114.7, 70.4, 67.8, 60.4, 59.9, 44.2 ppm.

$^{19}\text{F}$  NMR (282MHz,  $\text{CDCl}_3$ )  $\delta$  -114.7 ppm.

HRMS (ESI)  $m/z$ :  $[\text{M} + \text{Na}]^+$  calcd for  $\text{C}_{19}\text{H}_{19}\text{ClFNO}_2\text{Na}$  calcd.: 370.0998; found: 370.0976.

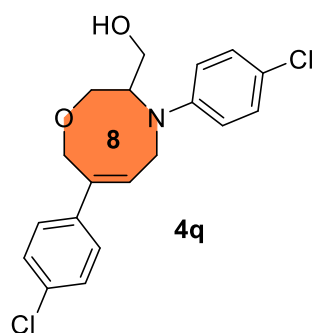

**(Z)-(4,7-Bis(4-chlorophenyl)-3,4,5,8-tetrahydro-2H-1,4-oxazocin-3-yl)**

**methanol (4q)** was prepared according to the General Procedure D as a yellow oil (chromatography eluent: petroleum ether/ethyl acetate = 3:1) in 61% yield (44.4 mg).

$^1\text{H}$  NMR (400 MHz,  $d_6$ -Acetone)  $\delta$  7.34 (s, 4H), 7.16-7.14 (m, 2H), 6.89-6.87 (m, 2H), 6.34 (t,  $J = 5.7$  Hz, 1H), 4.63-4.44 (m, 3H), 4.18 (dd,  $J = 12.5, 5.4$  Hz, 1H), 3.97-3.91 (m, 2H), 3.78-3.75 (m, 3H) ppm.

$^{13}\text{C}$  NMR (400 MHz,  $d_6$ -Acetone)  $\delta$  149.0, 142.0, 138.0, 133.3, 130.1, 129.6, 129.1, 128.5, 121.1, 114.7, 70.0, 67.7, 60.4, 60.0, 44.4 ppm.

HRMS (ESI)  $m/z$ :  $[\text{M} + \text{Na}]^+$  calcd for  $\text{C}_{19}\text{H}_{19}\text{Cl}_2\text{NO}_2\text{Na}$  calcd.: 386.0698; found: 386.0701.

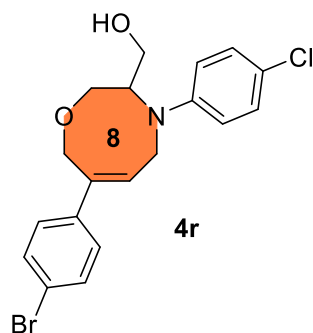

**(Z)-(7-(4-Bromophenyl)-4-(4-chlorophenyl)-3,4,5,8-tetrahydro-2H-1,4-oxazocin-3-yl) methanol (4r)** was prepared according to the General Procedure D as a yellow oil (chromatography eluent: petroleum ether/ethyl acetate = 3:1) in 51% yield (41.6 mg).

$^1\text{H NMR}$  (400 MHz,  $d_6$ -Acetone)  $\delta$  7.49 (d,  $J = 8.6$  Hz, 2H), 7.29 (d,  $J = 8.5$  Hz, 2H), 7.15 (d,  $J = 9.1$  Hz, 2H), 6.88 (d,  $J = 8.6$  Hz, 2H), 6.35 (t,  $J = 5.7$  Hz, 1H), 4.60 (dd,  $J = 17.7, 5.8$  Hz, 1H), 4.50 (q,  $J = 28.0, 15.0$  Hz, 2H), 4.18 (dd,  $J = 12.5, 5.5$  Hz, 1H), 3.97-3.91 (m, 2H), 3.77 (t,  $J = 6.3$  Hz, 3H) ppm.

$^{13}\text{C NMR}$  (400 MHz,  $d_6$ -Acetone)  $\delta$  149.0, 142.5, 138.1, 132.2, 130.2, 129.6, 128.9, 121.4, 121.1, 114.7, 69.9, 67.6, 60.4, 60.1, 44.4 ppm.

**HRMS** (ESI)  $m/z$ :  $[\text{M} + \text{H}]^+$  calcd for  $\text{C}_{19}\text{H}_{19}\text{BrClNO}_2\text{H}$  calcd.: 408.0367; found: 408.0357.

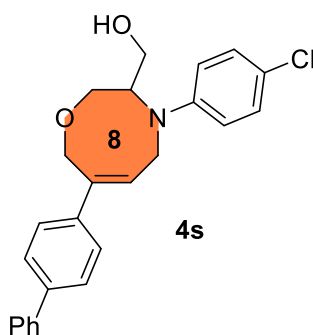

**(Z)-(7-([1,1'-Biphenyl]-4-yl)-4-(4-chlorophenyl)-3,4,5,8-tetrahydro-2H-1,4-oxazocin-3-yl) methanol (4s)** was prepared according to the General Procedure D as a yellow oil (chromatography eluent: petroleum ether/ethyl acetate = 3:1) in 79% yield (64.1 mg).

$^1\text{H NMR}$  (400 MHz,  $d_6$ -Acetone)  $\delta$  7.66-7.61 (m, 4H), 7.47-7.42 (m, 4H), 7.3 (t,  $J$  = 7.2 Hz, 1H), 7.16 (d,  $J$  = 8.9 Hz, 2H), 6.91 (d,  $J$  = 8.9 Hz, 2H), 6.39 (t,  $J$  = 5.8 Hz, 1H), 4.67-4.50 (m, 3H), 4.22 (dd,  $J$  = 12.4, 5.2 Hz, 1H), 3.99-3.93 (m, 2H), 3.80-3.78 (m, 3H) ppm.

$^{13}\text{C NMR}$  (400 MHz,  $d_6$ -Acetone)  $\delta$  149.1, 142.2, 141.3, 140.6, 139.0, 129.7, 129.6, 129.2, 128.2, 127.7, 127.54, 127.46 121.1, 114.8, 70.4, 68.0, 60.5, 60.0, 44.4 ppm.

**HRMS** (ESI)  $m/z$ :  $[\text{M} + \text{H}]^+$  calcd for  $\text{C}_{25}\text{H}_{24}\text{ClNO}_2\text{H}$  calcd.: 406.1575; found: 406.1566.

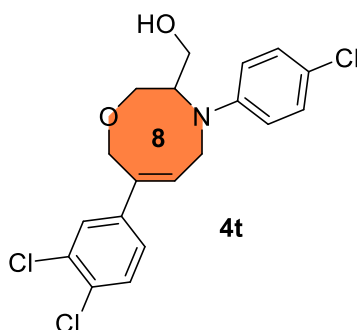

**(Z)-(4-(4-Chlorophenyl)-7-(3,4-dichlorophenyl)-3,4,5,8-tetrahydro-2H-1,4-oxazocin-3-yl) methanol (4t)** was prepared according to the General Procedure D as a yellow oil (chromatography eluent: petroleum ether/ethyl acetate = 3:1) in 56% yield (44.7 mg).

$^1\text{H NMR}$  (400 MHz,  $d_6$ -Acetone)  $\delta$  7.53 (s, 1H), 7.51 (d,  $J$  = 8.5 Hz, 1H), 7.322 (d,  $J$  = 8.4 Hz, 1H), 7.15 (d,  $J$  = 8.8 Hz, 2H), 6.88 (d,  $J$  = 8.8 Hz, 2H), 6.42 (t,  $J$  = 5.4 Hz, 1H), 4.61 (dd,  $J$  = 17.8, 5.5 Hz, 1H), 4.50 (s, 2H), 4.17 (dd,  $J$  = 12.5, 5.7 Hz, 1H), 4.00-3.93 (m, 2H), 3.81-3.76 (m, 3H) ppm.

$^{13}\text{C NMR}$  (400 MHz,  $d_6$ -Acetone)  $\delta$  149.1, 144.1, 136.9, 132.6, 131.8, 131.3, 131.2, 129.7, 128.9, 127.0, 121.4, 114.9, 69.6, 67.5, 60.6, 60.3, 44.8 ppm.

**HRMS** (ESI)  $m/z$ :  $[\text{M} + \text{H}]^+$  calcd for  $\text{C}_{19}\text{H}_{18}\text{Cl}_3\text{NO}_2\text{H}$  calcd.: 398.0482; found: 398.0485.

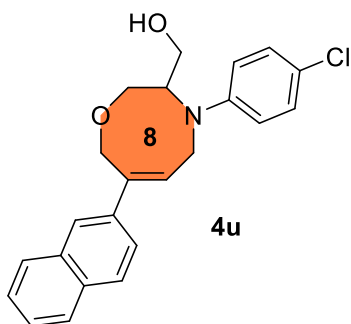

**(Z)-4-(4-Chlorophenyl)-7-(naphthalen-2-yl)-3,4,5,8-tetrahydro-2H-1,4-oxazocin-3-yl methanol (4u)** was prepared according to the General Procedure D as a yellow oil (chromatography eluent: petroleum ether/ethyl acetate = 3:1) in 63% yield (47.8 mg).

$^1\text{H NMR}$  (400 MHz,  $d_6$ -Acetone)  $\delta$  7.88-7.82 (m, 4H), 7.53-7.44 (m, 3H), 7.17 (d,  $J = 8.9$  Hz, 2H), 6.91 (d,  $J = 8.8$  Hz, 2H), 6.46 (t,  $J = 5.6$  Hz, 1H), 4.72-4.57 (m, 3H), 4.24 (dd,  $J = 5.3, 12.5$  Hz, 1H), 4.01-3.95 (m, 2H), 3.84-3.79 (m, 3H) ppm.

$^{13}\text{C NMR}$  (400 MHz,  $d_6$ -Acetone)  $\delta$  149.1, 140.5, 139.1, 134.3, 133.5, 129.9, 129.6, 128.8, 128.7, 128.3, 127.0, 126.6, 125.5, 125.3, 121.1, 114.8, 70.3, 67.8, 60.5, 60.1, 44.5 ppm.

**HRMS** (ESI)  $m/z$ :  $[\text{M} + \text{H}]^+$  calcd for  $\text{C}_{23}\text{H}_{22}\text{ClNO}_2\text{H}$  calcd.: 380.1418; found: 380.1413.

### General Procedure E: The synthesis of 1,4-oxazepanes 6.

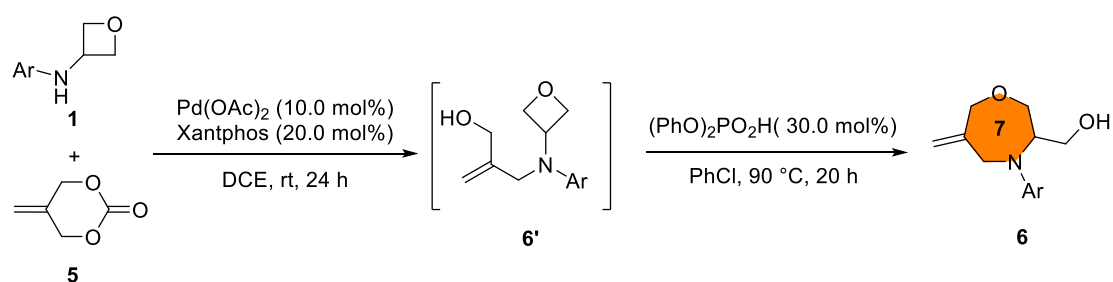

Under N<sub>2</sub> atmosphere, the solution of 3-aminooxetanes **1** (0.2 mmol, 1.0 equiv), 5-methylene-1,3-dioxan-2-one **5** (0.3 mmol, 1.5 equiv) and Xantphos (23.1 mg, 0.04 mmol, 20.0 mol%) in DCE (2.0 mL) was added Pd(OAc)<sub>2</sub> (4.5 mg, 0.02 mmol, 10.0 mol%). Then the reaction mixture was stirred at room temperature for 24 h. The reaction mixture was filtrated through a short column to remove the polar impurities and concentrated to afford crude products **6'**. Then the crude products **6'** was added to the solution of (PhO)<sub>2</sub>PO<sub>2</sub>H (15.0 mg, 0.06 mmol, 30 mol%) in PhCl (3.0 mL). The reaction mixture was stirred at 90 °C for 20 h, then concentrated under reduced pressure. The residue was purified by silica gel column chromatography (petroleum ether/ethyl acetate) to afford the desired products **6**.

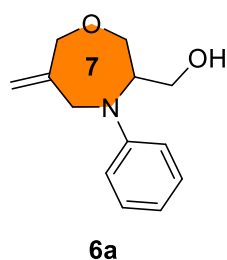

**(6-Methylene-4-phenyl-1,4-oxazepan-3-yl) methanol(6a)** was prepared according to the General Procedure E as a yellow oil (chromatography eluent: petroleum ether/ethyl acetate = 3:1) in 55% yield (24.1 mg).

<sup>1</sup>H NMR (400 MHz, *d*<sub>6</sub>-Acetone) δ 7.18-7.14 (m, 2H), 6.90-6.87 (m, 2H), 6.64 (tt, *J* = 7.2, 0.9 Hz, 1H), 5.08 (q, *J* = 1.2 Hz, 1H), 4.97 (q, *J* = 1.2 Hz, 1H), 4.27 (d, *J* = 14.4 Hz, 1H), 4.14 (s, 2H), 4.02-3.98 (m, 1H), 3.90-3.84 (m, 4H), 3.76 (dd, *J* = 12.6,

3.4 Hz, 1H) ppm.

$^{13}\text{C}$  NMR (400 MHz,  $d_6$ -Acetone)  $\delta$  150.3, 149.2, 129.8, 117.4, 113.9, 110.9, 76.1, 72.5, 60.9, 60.6, 48.8 ppm.

HRMS (ESI)  $m/z$ :  $[\text{M} + \text{Na}]^+$  calcd for  $\text{C}_{13}\text{H}_{17}\text{NO}_2\text{Na}$  calcd.: 242.1157; found: 242.1156.

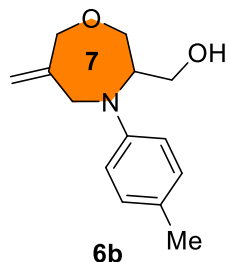

**(6-Methylene-4-(p-tolyl)-1,4-oxazepan-3-yl) methanol (6b)** was prepared according to the General Procedure E as a yellow oil (chromatography eluent: petroleum ether/ethyl acetate = 3:1) in 51% yield (23.8 mg).

$^1\text{H}$  NMR (400 MHz,  $d_6$ -Acetone)  $\delta$  6.97 (d,  $J = 8.4$  Hz, 2H), 6.79 (d,  $J = 8.7$  Hz, 2H), 5.05 (d,  $J = 1$  Hz, 1H), 4.95 (d,  $J = 1$  Hz, 1H), 4.26 (d,  $J = 14.4$  Hz, 1H), 4.10 (s, 2H), 4.01-3.97 (m, 2H), 3.84-3.83 (m, 3H), 3.76-3.72 (m, 1H), 2.18 (s, 3H) ppm.

$^{13}\text{C}$  NMR (400 MHz,  $d_6$ -Acetone)  $\delta$  149.6, 148.2, 130.4, 126.3, 114.3, 110.8, 76.2, 72.5, 61.1, 60.8, 49.0, 20.2 ppm.

HRMS (ESI)  $m/z$ :  $[\text{M} + \text{Na}]^+$  calcd for  $\text{C}_{14}\text{H}_{19}\text{NO}_2\text{Na}$  calcd.: 256.1298; found: 256.1316.

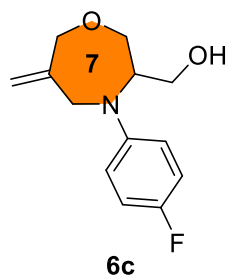

**(4-(4-Fluorophenyl)-6-methylene-1,4-oxazepan-3-yl) methanol (6c)** was prepared according to the General Procedure E as a yellow oil

(chromatography eluent: petroleum ether/ethyl acetate = 3:1) in 57% yield (27.0 mg).

$^1\text{H NMR}$  (400 MHz,  $d_6$ -Acetone)  $\delta$  6.96-6.86 (m, 4H), 5.07 (s, 1H), 4.97 (s, 1H), 4.26 (d,  $J$  = 14.4 Hz, 1H), 4.19-4.05 (m, 2H), 4.00-3.95 (m, 2H), 3.89-3.82 (m, 3H), 3.79-3.75 (m, 1H) ppm.

$^{13}\text{C NMR}$  (400 MHz,  $d_6$ -Acetone)  $\delta$  156.1(d,  $J$  = 234.2 Hz), 149.1, 147.3 (d,  $J$  = 1.7 Hz), 116.1, 115.9, 115.5 (d,  $J$  = 7.2 Hz), 111.2, 76.2, 72.5, 61.2 (d,  $J$  = 33.3 Hz), 49.5 ppm.

$^{19}\text{F NMR}$  (282MHz,  $\text{CDCl}_3$ )  $\delta$  -130.4 ppm.

**HRMS** (ESI)  $m/z$ :  $[\text{M} + \text{Na}]^+$  calcd for  $\text{C}_{13}\text{H}_{16}\text{FNO}_2\text{Na}$  calcd.: 260.1063; found: 260.1061.

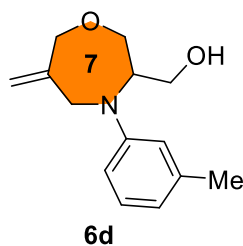

**(6-Methylene-4-(m-tolyl)-1,4-oxazepan-3-yl) methanol (6d)** was prepared according to the General Procedure E as a yellow oil (chromatography eluent: petroleum ether/ethyl acetate = 3:1) in 59% yield (27.5 mg).

$^1\text{H NMR}$  (400 MHz,  $d_6$ -Acetone)  $\delta$  7.03 (t,  $J$  = 7.9 Hz, 1H), 6.72-6.66 (m, 2H), 6.47 (d,  $J$  = 7.4 Hz, 1H), 5.08 (d,  $J$  = 1.1Hz, 1H), 4.96 (d,  $J$  = 1.1Hz, 1H), 4.26 (d,  $J$  = 14.3 Hz, 1H), 4.12 (s, 2H), 4.01-3.97 (m, 1H), 3.88-3.82 (m, 4H), 3.77-3.73 (m, 1H), 2.23 (s, 3H) ppm.

$^{13}\text{C NMR}$  (400 MHz,  $d_6$ -Acetone)  $\delta$  150.4, 149.4, 139.2, 129.8, 118.4, 114.7, 111.3, 110.8, 76.2, 72.6, 61.0, 60.6, 48.9, 21.9 ppm.

**HRMS** (ESI)  $m/z$ :  $[\text{M} + \text{Na}]^+$  calcd for  $\text{C}_{14}\text{H}_{19}\text{NO}_2\text{Na}$  calcd.: 256.1298; found: 256.1317.



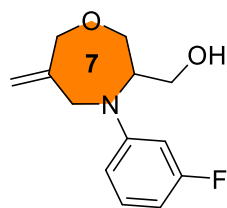

**6e**

**(4-(3-Fluorophenyl)-6-methylene-1,4-oxazepan-3-yl) methanol (6e)** was prepared according to the General Procedure E as a yellow oil (chromatography eluent: petroleum ether/ethyl acetate = 3:1) in 61% yield (28.9 mg).

$^1\text{H NMR}$  (400 MHz,  $d_6$ -Acetone)  $\delta$  7.15 (q,  $J = 15.8, 8.2$  Hz, 1H), 6.70 (dd,  $J = 8.5, 2.4$  Hz, 1H), 6.61 (dt,  $J = 13.6, 2.4$  Hz, 1H), 6.36 (td,  $J = 18.2, 2.0$  Hz, 1H), 5.13 (s, 1H), 5.01 (s, 1H), 4.30 – 4.10 (m, 3H), 4.01-3.97 (m, 2H), 3.92-3.84 (m, 3H), 3.81-3.77 (m, 1H)ppm.

$^{13}\text{C NMR}$  (400 MHz,  $d_6$ -Acetone)  $\delta$  165.0 (d,  $J = 240.6$  Hz), 152.4 (d,  $J = 10.8$  Hz), 148.4, 131.1 (d,  $J = 10.5$  Hz), 111.5, 109.6 (d,  $J = 2.0$  Hz), 103.4 (d,  $J = 21.9$ Hz), 100.5 (d,  $J = 26.6$  Hz), 76.3, 72.6, 60.9, 60.8, 48.9 ppm.

$^{19}\text{F NMR}$  (282MHz,  $\text{CDCl}_3$ )  $\delta$  -114.0 ppm.

**HRMS** (ESI)  $m/z$ :  $[\text{M} + \text{Na}]^+$  calcd for  $\text{C}_{13}\text{H}_{16}\text{FNO}_2\text{Na}$  calcd.: 260.1063; found: 260.1073.

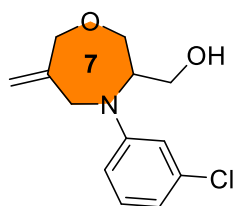

**6f**

**(4-(3-Chlorophenyl)-6-methylene-1,4-oxazepan-3-yl) methanol (6f)** was prepared according to the General Procedure E as a yellow oil (chromatography eluent: petroleum ether/ethyl acetate = 3:1) in 51% yield (25.9 mg).

$^1\text{H NMR}$  (400 MHz,  $d_6$ -Acetone)  $\delta$  7.14 (t,  $J = 8.1$  Hz, 1H), 6.88-6.83 (m, 2H),

6.63 (d,  $J = 7.8$  Hz, 1H), 5.13 (s, 1H), 5.01 (s, 1H), 4.31-4.10 (m, 3H), 4.01-3.90 (m, 3H), 3.87-3.77(m, 3H) ppm.

$^{13}\text{C}$  NMR (400 MHz,  $d_6$ -Acetone)  $\delta$  151.7, 148.2, 135.3, 131.1, 116.9, 113.4, 112.2, 111.5, 76.2, 72.5, 60.8, 60.7, 48.8 ppm.

**HRMS** (ESI)  $m/z$ :  $[\text{M} + \text{Na}]^+$  calcd for  $\text{C}_{13}\text{H}_{16}\text{ClNO}_2\text{Na}$  calcd.: 276.0768; found: 276.0775.

## V. Gram-scale Synthesis and Derivation of Products

### Gram-scale synthesis:

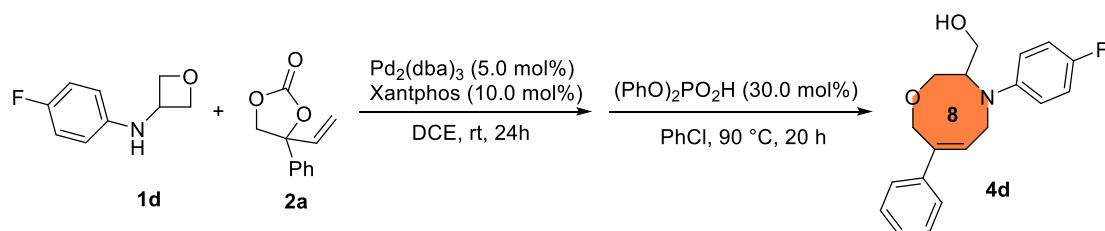

Under an  $\text{N}_2$  atmosphere, to a solution of 4-phenyl-4-vinyl-1,3-dioxolan-2-one **2a** (1.1412 g, 6.0 mmol, 2.0 equiv.), *N*-(4-fluorophenyl)oxetan-3-amine **1d** (501.5 mg, 3.0 mmol, 1.0 equiv), and Xantphos (173.6 mg, 0.3 mmol, 10 mol%) in DCE (30 mL) was added  $\text{Pd}_2(\text{dba})_3$  (137.4 mg, 0.15 mmol, 5.0 mol%). Then the reaction mixture was stirred at room temperature for 24 h. The reaction mixture was filtrated through a short column to remove the polar impurities and concentrated to afford crude products **3d**. Then the crude products **3d** was added to the solution of  $(\text{PhO})_2\text{PO}_2\text{H}$  (225.2 mg, 0.9 mmol, 30 mol%) in PhCl (45.0 mL). The reaction mixture was stirred at 90 °C for 20 h, then concentrated under reduced pressure. The residue was purified by silica gel column chromatography (petroleum ether/ethyl acetate = 3:1) to afford the desired product **4d** (752 mg, 80% yield).

### Derivation of Product:

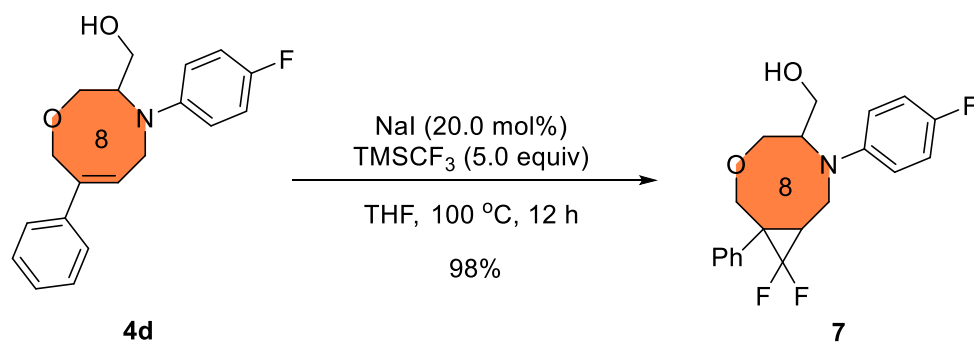

**(9,9-Difluoro-6-(4-fluorophenyl)-1-phenyl-3-oxa-6-azabicyclo[6.1.0]nonan-5-yl)methanol (7):** Under  $\text{N}_2$  atmosphere, to a solution of anhydrous **4d**

(62.7 mg, 0.2 mmol, 1.0 equiv) and NaI (9.1 mg, 0.06 mmol, 30 mol%) in anhydrous THF (1.8 mL) was added TMSCF<sub>3</sub> (0.55 mL). Then the reaction mixture was heated up to 100 °C and kept stirred for 12 h. The reaction mixture was concentrated under reduced pressure. Then the residue was purified by silica gel column chromatography (Hexanes/DCM = 2:1) to afford the desired product **7** as a yellow oil in 98% yield (30.7 mg).

<sup>1</sup>H NMR (400 MHz, *d*<sub>6</sub>-Acetone) δ 7.25-7.03 (m, 9H), 4.22-4.01 (m, 6H), 3.91-3.82 (m, 1H), 3.74-3.62 (m, 2H), 2.56 (t, *J* = 11.8 Hz, 1H) ppm.

<sup>13</sup>C NMR (400 MHz, *d*<sub>6</sub>-Acetone) δ 156.0 (d, *J* = 234.5 Hz), 145.7 (dd, *J* = 17.0, 1.6 Hz), 139.9, 129.8 (t, *J* = 2.2 Hz), 129.4, 128.3, 116.5 (dd, *J* = 22.1, 6.3 Hz), 114.6 (dd, *J* = 19.0, 7.2 Hz), 74.2 (d, *J* = 10.2 Hz), 73.5 (dd, *J* = 14.6, 4.6 Hz), 61.0, 59.9 (d, *J* = 120.2 Hz), 59.8 (d, *J* = 109.4 Hz), 59.0, 40.5 (t, *J* = 9.6 Hz), 40.1 (dd, *J* = 21.6, 3.4 Hz) ppm.

<sup>19</sup>F NMR (282MHz, CDCl<sub>3</sub>) δ -127.7 (dd, *J* = 163.3, 4.2 Hz), -130.8 (d, *J* = 8.7 Hz), -144.1 (dd, *J* = 163.4, 28.1 Hz) ppm.

HRMS (ESI) *m/z*: [M + H]<sup>+</sup> calcd for C<sub>20</sub>H<sub>20</sub>F<sub>3</sub>NO<sub>2</sub>H calcd.: 364.1525; found: 364.1522.

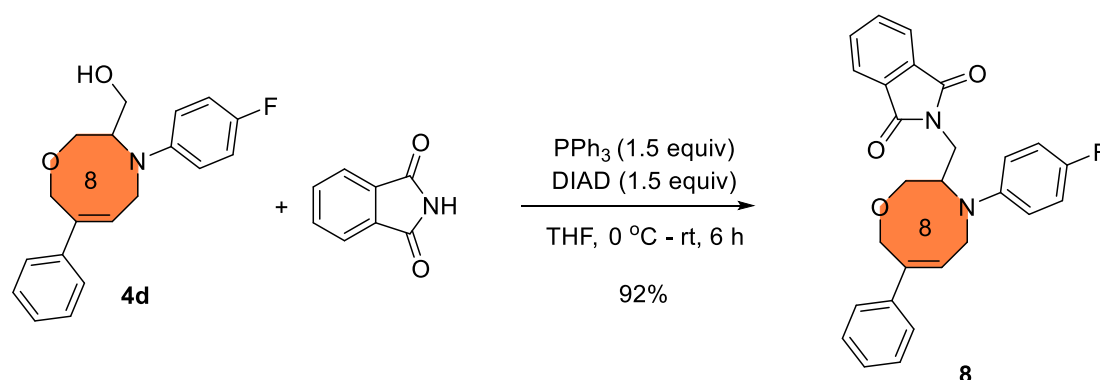

**(Z)-2-((4-(4-Fluorophenyl)-7-phenyl-3,4,5,8-tetrahydro-2H-1,4-oxazocin-3-yl)methyl)isoindoline-1,3-dione (8):** At 0 °C, to a solution of **4d** (31.3 mg, 0.1 mmol, 1.5 equiv), isoindoline-1,3-dione (22.1 mg, 0.15 mmol, 1.5 equiv) and PPh<sub>3</sub> (39.3 mg, 0.15mmol, 1.5 equiv) in THF (1.0 mL) was added dropwise

diisopropyl diazene-1,2-dicarboxylate (DIAD) (30.3 mg, 0.15 mmol, 1.5 equiv). Then the reaction mixture was stirred at room temperature for 6 h. the reaction mixture was concentrated under reduced pressure. The residue was purified by silica gel column chromatography (petroleum ether/ethyl acetate = 10: 1) to afford the desired product **8** in 92% yield (40.7 mg).

<sup>1</sup>H NMR (400 MHz, *d*<sub>6</sub>-Benzene) δ 7.42-7.32 (m, 2H), 7.09-7.03 (m, 5H), 6.83-6.71 (m, 4H), 6.68-6.63 (m, 2H), 5.96 (t, *J* = 6.6 Hz, 1H), 4.68 (dd, *J* = 16.8, 7.1 Hz, 1H), 4.56-4.19 (m, 3H), 4.12-4.06 (m, 1H), 3.77 (dd, *J* = 12.3, 4.4 Hz, 1H), 3.68-3.61 (m, 2H), 3.37 (dd, *J* = 12.4, 2.2 Hz, 1H) ppm.

<sup>13</sup>C NMR (400 MHz, *d*<sub>6</sub>-Benzene) δ 168.3, 155.8 (d, *J* = 236.1 Hz), 145.9 (d, *J* = 1.9 Hz), 142.2, 139.5, 133.6, 132.3, 128.6, 127.9, 127.6, 126.6, 123.0, 116.1 (d, *J* = 22.1 Hz), 113.7 (d, *J* = 7.2 Hz), 70.8, 68.5, 55.5, 42.8, 36.8 ppm.

<sup>19</sup>F NMR (282MHz, CDCl<sub>3</sub>) δ -128.9 ppm.

HRMS (ESI) *m/z*: [M + Na]<sup>+</sup> calcd for C<sub>27</sub>H<sub>23</sub>FN<sub>2</sub>O<sub>3</sub>Na calcd.: 465.1591; found: 465.1589.

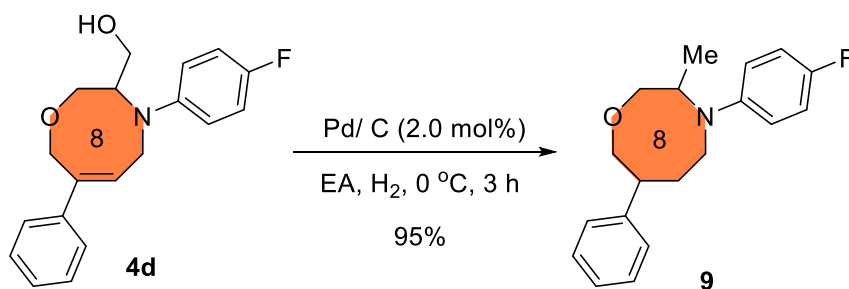

**4-(4-Fluorophenyl)-3-methyl-7-phenyl-1,4-oxazocane(9):** To a solution of **4d** (62.7 mg, 0.2 mmol, 1.0 equiv) in ethyl acetate (2.0 mL) was added Pd/C (12.5 mg, 20 wt.%, 2.0 mol%) and hydrogen gas was bubbled from a balloon at 0 °C. After 3 h, the reaction mixture was filtered through a pad of celite and washed with ethyl acetate (5.0 mL) and diethyl ether (5.0 mL). The combined organic phase was dried with Na<sub>2</sub>SO<sub>4</sub>, concentrated under reduce pressure, then the residue was purified by silica gel column chromatography (chromatography eluent: petroleum ether/ ethyl acetate = 2:1) to afford the

desired product **9** as a yellow oil in 95% yield (56.8 mg, ~ 1 : 1 dr).

#### Isomer I

$^1\text{H}$  NMR (400 MHz,  $d_6$ -Acetone)  $\delta$  7.32-7.18 (m, 5H), 6.88-6.84 (m, 2H), 6.63-6.58 (m, 2H), 3.63-3.47 (m, 7H), 2.99 (s, 1.2H), 2.79-2.72 (m, 1H), 1.88-1.80 (m, 1H), 1.62-1.50 (m, 1H), 0.78 (d,  $J = 7.6$  Hz, 3H) ppm.

$^{13}\text{C}$  NMR (400 MHz,  $d_6$ -Acetone)  $\delta$  155.9 (d,  $J = 232.8$  Hz), 145.5, 144.0 (d,  $J = 5.3$  Hz), 128.9, 128.7, 126.9, 115.9 (d,  $J = 21.9$  Hz), 114.48 (d,  $J = 8.0$  Hz), 76.2, 70.6, 62.0, 55.70, 48.5, 25.98, 12.1 ppm.

$^{19}\text{F}$  NMR (282MHz,  $\text{CDCl}_3$ )  $\delta$  -127.1 ppm.

#### Isomer I

$^1\text{H}$  NMR (400 MHz,  $d_6$ -Acetone)  $\delta$  7.32-7.18 (m, 5H), 6.88-6.84 (m, 2H), 6.63-6.58 (m, 2H), 3.63-3.47 (m, 7H), 2.99 (s, 1.2H), 2.79-2.72 (m, 1H), 1.88-1.80 (m, 1H), 1.62-1.50 (m, 1H), 0.77 (d,  $J = 7.2$  Hz, 3H) ppm.

$^{13}\text{C}$  NMR (400 MHz,  $d_6$ -Acetone)  $\delta$  155.9 (d,  $J = 232.8$  Hz), 145.5, 144.0 (d,  $J = 5.3$  Hz), 128.9, 128.7, 126.9, 115.9 (d,  $J = 21.9$  Hz), 114.46 (d,  $J = 7.0$  Hz), 76.2, 70.6, 62.0, 55.66, 48.5, 25.97, 12.1 ppm.

$^{19}\text{F}$  NMR (282MHz,  $\text{CDCl}_3$ )  $\delta$  -127.2 ppm.

HRMS (ESI)  $m/z$ :  $[\text{M} + \text{H}]^+$  calcd for  $\text{C}_{19}\text{H}_{22}\text{FNO}_2\text{H}$  calcd.: 322.1583; found: 322.1592.

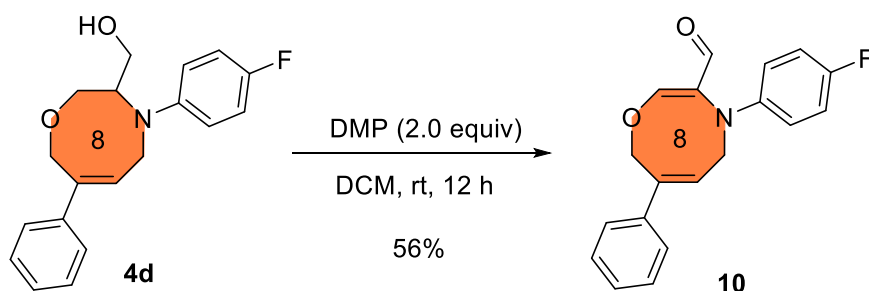

**(2Z,6Z)-4-(4-Fluorophenyl)-7-phenyl-5,8-dihydro-4H-1,4-oxazocine-3-carbaldehyde (10):** At 0 °C, to a solution of **4d** (31.3 mg, 0.1 mmol, 1.0 equiv) in anhydrous  $\text{CH}_2\text{Cl}_2$  (4.0 mL) was added Dess-Martin periodinane (DMP) (254.5 mg, 0.6 mmol, 2.0 equiv). The reaction mixture was spontaneously warmed to

room temperature and kept stirring for 12 h. The mixture was diluted with CH<sub>2</sub>Cl<sub>2</sub> (15 mL), washed with water and brine, dried over anhydrous Na<sub>2</sub>SO<sub>4</sub>, concentrated under reduced pressure. Then the residue was purified by silica gel column chromatography (petroleum ether/ethyl acetate = 10:1 to 5:1) to afford the desired product **10** as yellow oil in 56% yield (52.0 mg).

<sup>1</sup>H NMR (400 MHz, *d*<sub>6</sub>-Acetone) δ 9.42 (s, 1H), 7.73 (s, 1H), 7.45-7.42 (m, 2H), 7.39-7.35 (m, 2H), 7.31-7.27 (m, 1H), 7.00-6.95 (m, 2H), 6.77-6.73 (m, 2H), 6.32 (t, *J* = 3.4 Hz, 1H), 5.23 (s, 2H), 4.46 (d, *J* = 3.4 Hz, 2H) ppm.

<sup>13</sup>C NMR (400 MHz, *d*<sub>6</sub>-Acetone) δ 189.9, 167.0, 156.7 (d, *J* = 235.0 Hz), 145.4, 143.2, 136.0, 133.9, 129.4, 128.2 (d, *J* = 2.2 Hz), 126.8, 116.5 (d, *J* = 22.6 Hz), 114.8 (d, *J* = 7.5 Hz), 69.8, 52.6 ppm.

<sup>19</sup>F NMR (282MHz, CDCl<sub>3</sub>) δ -127.6 ppm.

HRMS (ESI) *m/z*: [M + Na]<sup>+</sup> calcd for C<sub>19</sub>H<sub>16</sub>FNO<sub>2</sub> Na calcd.: 332.1063; found: 332.1066.

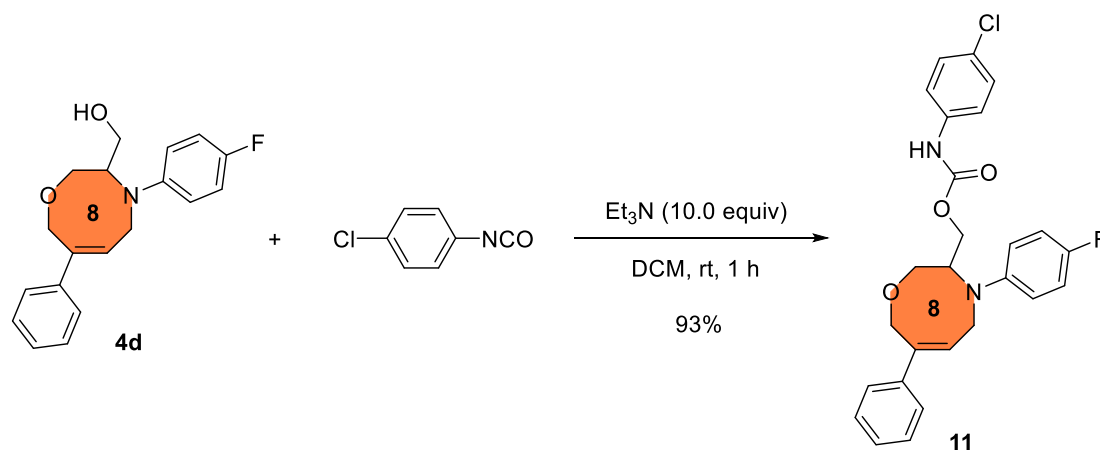

**(Z)-4-(4-Fluorophenyl)-7-phenyl-3,4,5,8-tetrahydro-2H-1,4-oxazocin-3-ylmethyl (4-chlorophenyl)carbamate (11):** To a solution of **4d** (31.3 mg, 0.1 mmol, 1.0 equiv) and 4-chlorophenyl isocyanate (23.0 mg, 0.15 mmol, 1.5 equiv) in DCM (1.0 mL) was added Et<sub>3</sub>N (0.14 mL, 1.0 mmol, 10.0 equiv). The solution was stirred at room temperature for 1 h. The reaction mixture was concentrated under reduced pressure. The residue was purified by silica gel

column chromatography (petroleum ether/ethyl acetate = 10:1) to afford the desired product **11** in 93% yield (43.4 mg).

**<sup>1</sup>H NMR** (400 MHz, *d*<sub>6</sub>-Acetone) δ 8.95 (s, 1 H), 7.58 (d, *J* = 8.4 Hz, 2H), 7.33-7.26 (m, 7H), 6.95 (d, *J* = 6.9 Hz, 4H), 6.34 (t, *J* = 6.2 Hz, 1H), 4.70-4.64 (m, 2H), 4.54-4.47 (m, 2H), 4.29-4.13 (m, 3H), 3.90 (dd, *J* = 17.0, 6.0 Hz, 1H), 3.79 (d, *J* = 12.2 Hz, 1H) ppm.

**<sup>13</sup>C NMR** (400 MHz, *d*<sub>6</sub>-Acetone) δ 156.0 (d, *J* = 234.3 Hz), 154.3, 146.7 (d, *J* = 1.3 Hz), 142.9, 139.7, 138.9, 129.5, 129.1, 128.9, 128.1, 127.8, 126.9, 120.6, 116.2 (d, *J* = 22.1 Hz), 114.6 (d, *J* = 7.3 Hz), 70.8, 68.0, 62.5, 57.0, 44.2 ppm.

**<sup>19</sup>F NMR** (282MHz, CDCl<sub>3</sub>) δ -128.3 ppm.

**HRMS** (ESI) *m/z*: [M + H]<sup>+</sup> calcd for C<sub>26</sub>H<sub>24</sub>ClFN<sub>2</sub>O<sub>3</sub>H calcd.: 467.1538; found: 467.1539.



# NMR spectra

LJX-1a

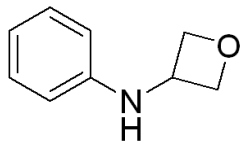

**1a**

7.260  
7.225  
7.220  
7.215  
7.202  
7.199  
7.185  
7.181  
7.175  
6.798  
6.779  
6.761  
6.522  
6.520  
6.501  
6.499  
5.019  
5.003  
4.986  
4.668  
4.652  
4.637  
4.622  
4.606  
4.549  
4.533  
4.518  
4.174

Current Data Parameters  
NAME 20230709-400M  
EXPNO 1  
PROCNO 1

F2 - Acquisition Parameters  
Date\_ 20230708  
Time 15.57  
INSTRUM spect  
PROBHD 5 mm PADUL 13C  
PULPROG zg30  
TD 65536  
SOLVENT CDC13  
NS 6  
DS 2  
SWH 8223.685 Hz  
FIDRES 0.125483 Hz  
AQ 3.9845889 sec  
RG 113.67  
DW 60.800 usec  
DE 6.50 usec  
TE 290.6 K  
D1 1.00000000 sec  
TD0 1

==== CHANNEL f1 =====  
NUC1 1H  
P1 9.90 usec  
PLW1 23.00000000 W  
SFO1 400.1924713 MHz

F2 - Processing parameters  
SI 65536  
SF 400.1900140 MHz  
WDW EM  
SSB 0  
LB 0.30 Hz  
GB 0  
PC 1.00

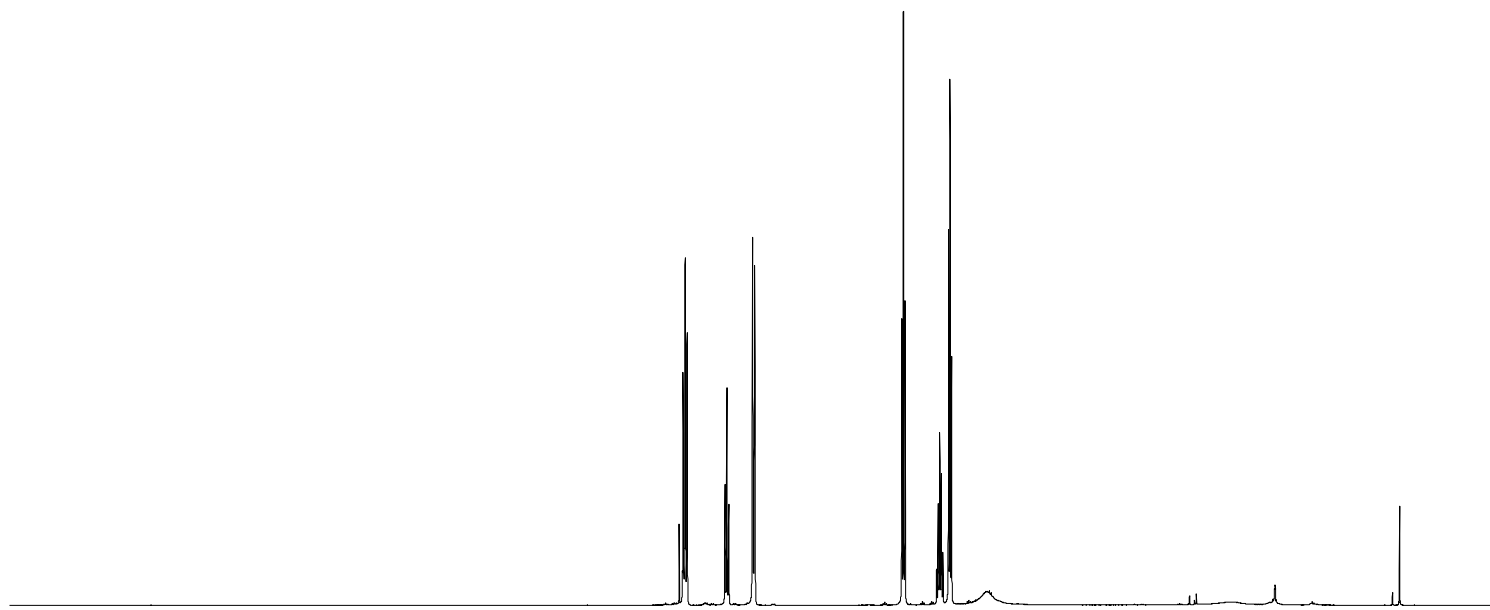

13 12 11 10 9 8 7 6 5 4 3 2 1 0 ppm

1.96  
0.98  
1.98  
2.00  
1.01  
2.01

LJX-1b

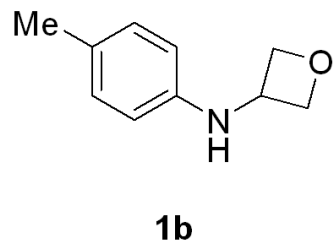

7.260  
7.020  
6.999  
6.457  
6.450  
6.445  
6.434  
6.429  
6.423  
5.008  
4.992  
4.975  
4.641  
4.625  
4.610  
4.595  
4.579  
4.534  
4.519  
4.503  
4.036  
2.250

Current Data Parameters  
NAME 20230709-400M  
EXPNO 2  
PROCNO 1

F2 - Acquisition Parameters  
Date\_ 20230708  
Time 16.02  
INSTRUM spect  
PROBHD 5 mm PADUL 13C  
PULPROG zg30  
TD 65536  
SOLVENT CDCl3  
NS 6  
DS 2  
SWH 8223.685 Hz  
FIDRES 0.125483 Hz  
AQ 3.9845889 sec  
RG 100.49  
DW 60.800 usec  
DE 6.50 usec  
TE 290.7 K  
D1 1.00000000 sec  
TD0 1

==== CHANNEL f1 =====  
NUC1 1H  
P1 9.90 usec  
PLW1 23.00000000 W  
SFO1 400.1924713 MHz

F2 - Processing parameters  
SI 65536  
SF 400.1900140 MHz  
WDW EM  
SSB 0  
LB 0.30 Hz  
GB 0  
PC 1.00

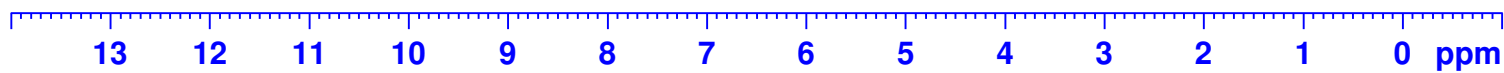

2.02  
2.00  
2.00  
1.02  
2.02  
2.99

LJX-1c

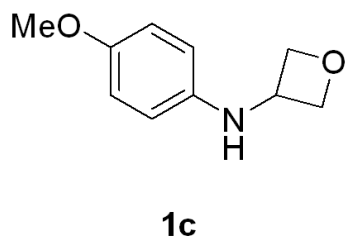

7.259  
6.804  
6.795  
6.790  
6.779  
6.773  
6.764  
6.498  
6.489  
6.483  
6.472  
6.466  
6.457  
4.995  
4.980  
4.963  
4.598  
4.582  
4.567  
4.553  
4.549  
4.537  
4.519  
4.504  
4.490  
3.744

Current Data Parameters  
NAME 20230709-400M  
EXPNO 3  
PROCNO 1

F2 - Acquisition Parameters  
Date\_ 20230708  
Time 16.05  
INSTRUM spect  
PROBHD 5 mm PADUL 13C  
PULPROG zg30  
TD 65536  
SOLVENT CDC13  
NS 6  
DS 2  
SWH 8223.685 Hz  
FIDRES 0.125483 Hz  
AQ 3.9845889 sec  
RG 113.67  
DW 60.800 usec  
DE 6.50 usec  
TE 290.7 K  
D1 1.00000000 sec  
TD0 1

==== CHANNEL f1 =====  
NUC1 1H  
P1 9.90 usec  
PLW1 23.00000000 W  
SFO1 400.1924713 MHz

F2 - Processing parameters  
SI 65536  
SF 400.1900142 MHz  
WDW EM  
SSB 0  
LB 0.30 Hz  
GB 0  
PC 1.00

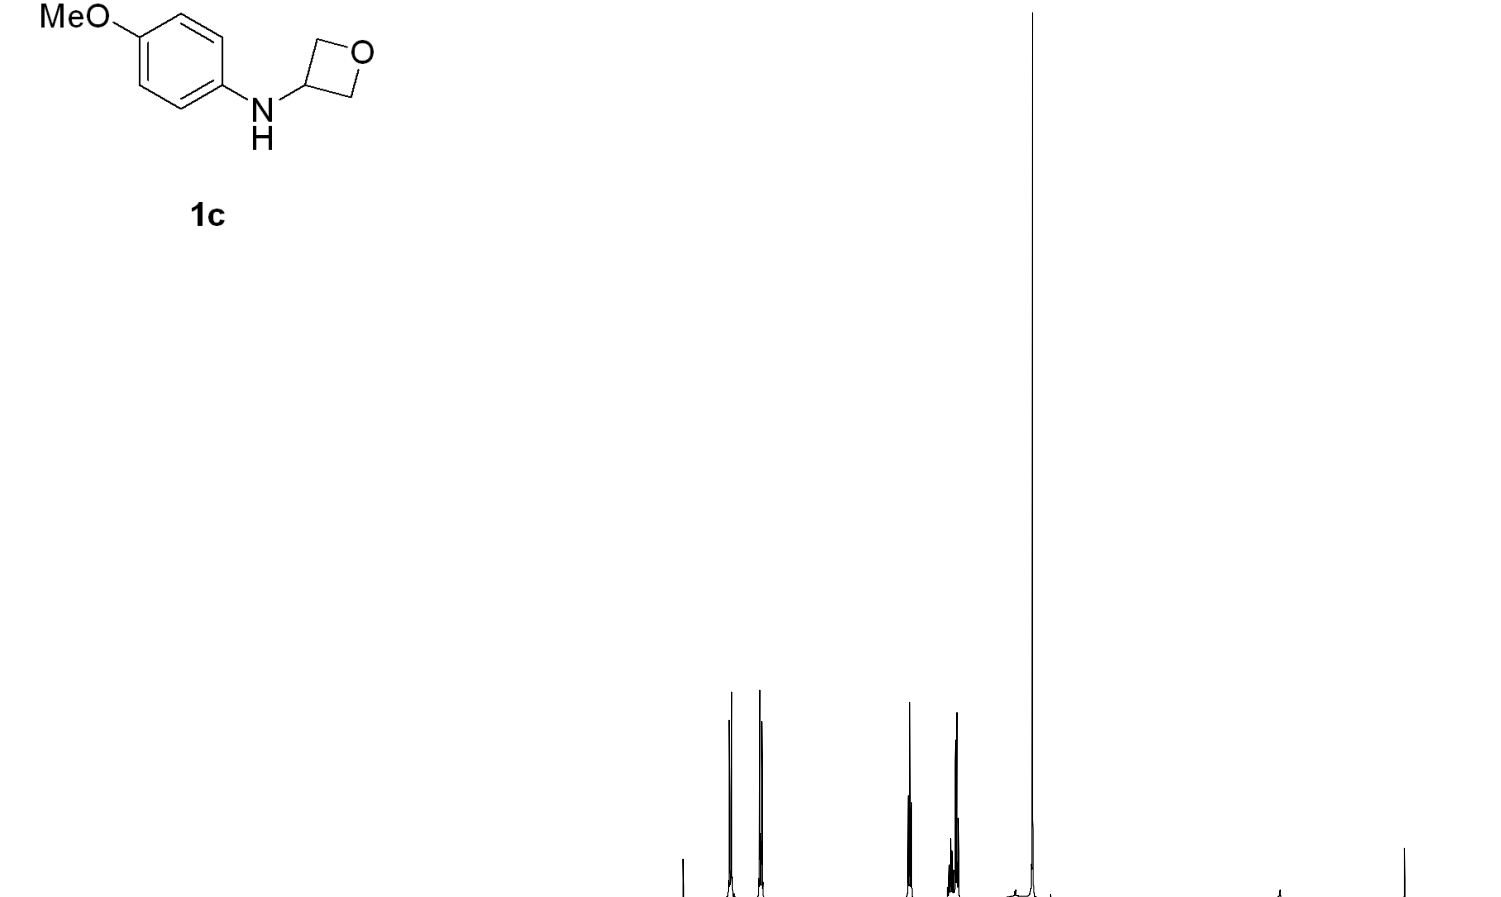

13 12 11 10 9 8 7 6 5 4 3 2 1 0 ppm

2.01  
2.01  
2.00  
3.10  
3.01

LJX-1d

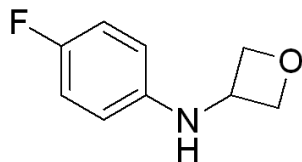

1d

7.260  
6.928  
6.919  
6.913  
6.907  
6.902  
6.897  
6.892  
6.887  
6.881  
6.875  
6.866  
6.459  
6.449  
6.443  
6.438  
6.433  
6.427  
6.422  
6.416  
6.407  
5.000  
4.985  
4.968  
4.594  
4.579  
4.564  
4.549  
4.545  
4.534  
4.517  
4.502  
4.488  
4.074

Current Data Parameters  
NAME 20230709-400M  
EXPNO 4  
PROCNO 1

F2 - Acquisition Parameters  
Date\_ 20230708  
Time 16.09  
INSTRUM spect  
PROBHD 5 mm PADUL 13C  
PULPROG zg30  
TD 65536  
SOLVENT CDCl3  
NS 6  
DS 2  
SWH 8223.685 Hz  
FIDRES 0.125483 Hz  
AQ 3.9845889 sec  
RG 100.49  
DW 60.800 usec  
DE 6.50 usec  
TE 290.7 K  
D1 1.00000000 sec  
TD0 1

==== CHANNEL f1 =====  
NUC1 1H  
P1 9.90 usec  
PLW1 23.00000000 W  
SFO1 400.1924713 MHz

F2 - Processing parameters  
SI 65536  
SF 400.1900140 MHz  
WDW EM  
SSB 0  
LB 0.30 Hz  
GB 0  
PC 1.00

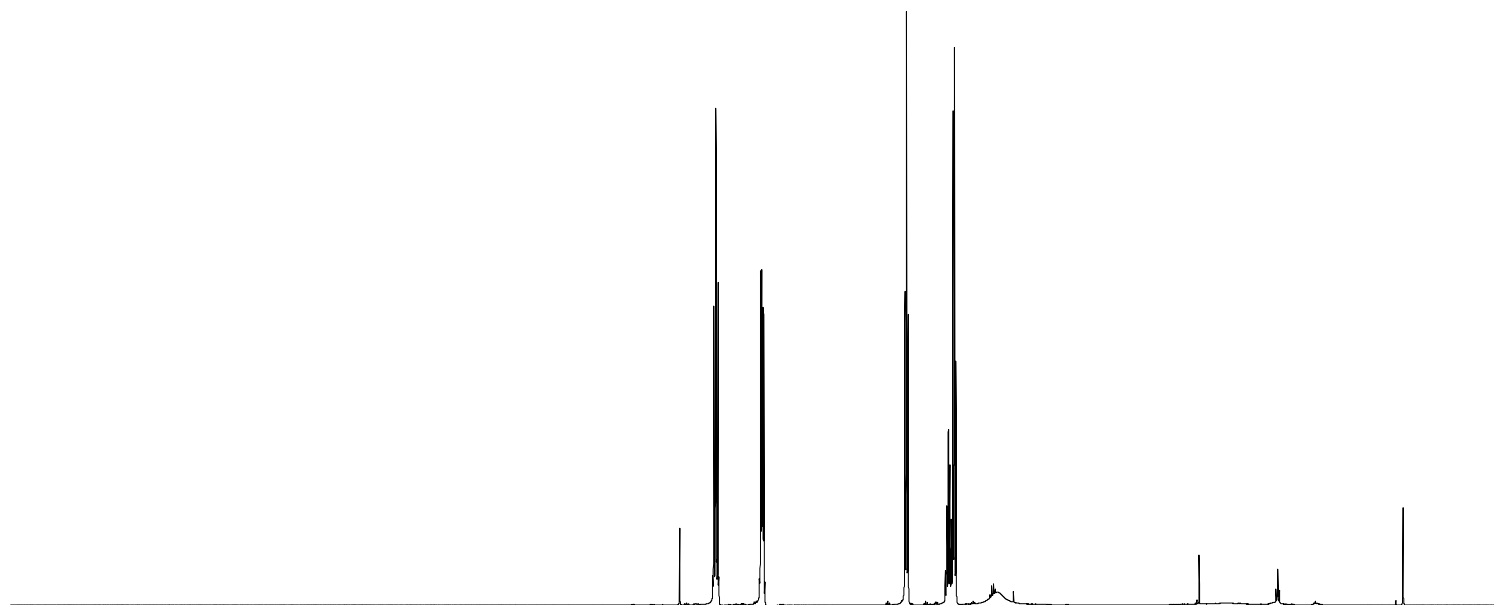

13 12 11 10 9 8 7 6 5 4 3 2 1 0 ppm

1.95  
2.00  
2.00  
3.06

LJX-1e

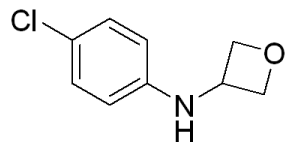

1e

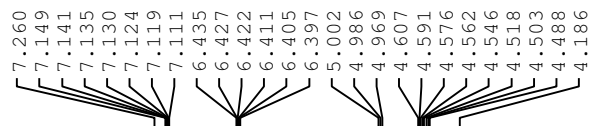

Current Data Parameters  
NAME 20230709-400M  
EXPNO 5  
PROCNO 1

F2 - Acquisition Parameters  
Date\_ 20230708  
Time 16.13  
INSTRUM spect  
PROBHD 5 mm PADUL 13C  
PULPROG zg30  
TD 65536  
SOLVENT CDC13  
NS 6  
DS 2  
SWH 8223.685 Hz  
FIDRES 0.125483 Hz  
AQ 3.9845889 sec  
RG 113.67  
DW 60.800 usec  
DE 6.50 usec  
TE 290.7 K  
D1 1.00000000 sec  
TD0 1

==== CHANNEL f1 =====  
NUC1 1H  
P1 9.90 usec  
PLW1 23.00000000 W  
SFO1 400.1924713 MHz

F2 - Processing parameters  
SI 65536  
SF 400.1900140 MHz  
WDW EM  
SSB 0  
LB 0.30 Hz  
GB 0  
PC 1.00

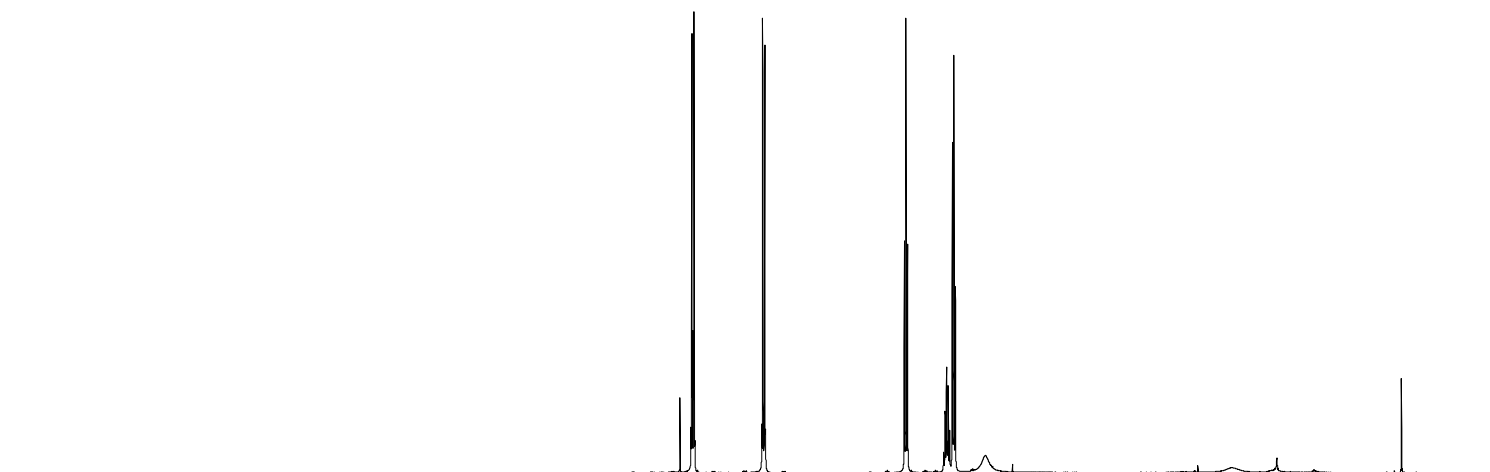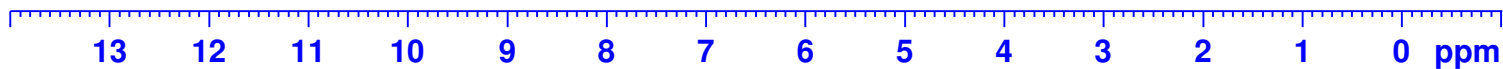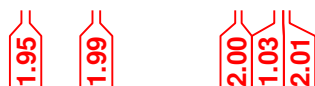

LJX-1f

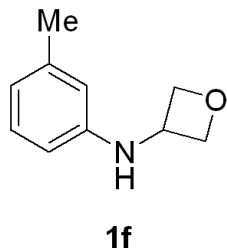

7.260  
7.114  
7.112  
7.095  
7.093  
7.074  
6.623  
6.622  
6.604  
6.337  
6.318  
6.313  
5.021  
5.005  
4.988  
4.663  
4.648  
4.632  
4.617  
4.601  
4.544  
4.528  
4.513  
4.143  
2.295

Current Data Parameters  
NAME 20230709-400M  
EXPNO 6  
PROCNO 1

F2 - Acquisition Parameters  
Date\_ 20230708  
Time 16.17  
INSTRUM spect  
PROBHD 5 mm PADUL 13C  
PULPROG zg30  
TD 65536  
SOLVENT CDCl3  
NS 6  
DS 2  
SWH 8223.685 Hz  
FIDRES 0.125483 Hz  
AQ 3.9845889 sec  
RG 61.19  
DW 60.800 usec  
DE 6.50 usec  
TE 290.7 K  
D1 1.00000000 sec  
TD0 1

==== CHANNEL f1 =====  
NUC1 1H  
P1 9.90 usec  
PLW1 23.00000000 W  
SFO1 400.1924713 MHz

F2 - Processing parameters  
SI 65536  
SF 400.1900139 MHz  
WDW EM  
SSB 0  
LB 0.30 Hz  
GB 0  
PC 1.00

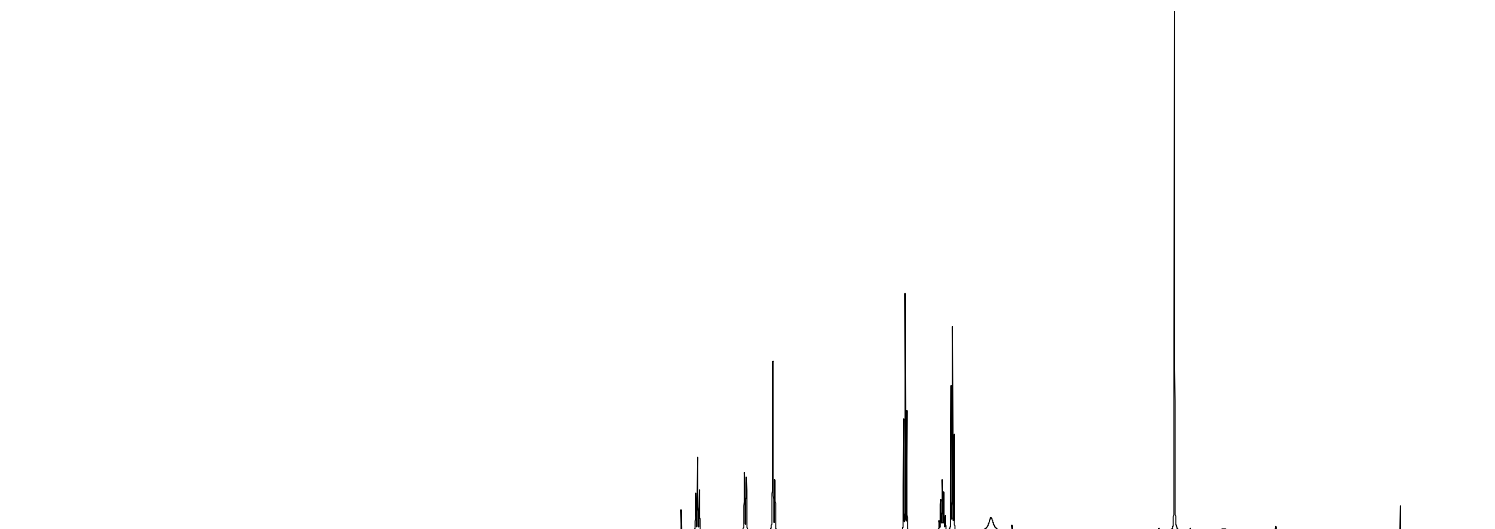

13 12 11 10 9 8 7 6 5 4 3 2 1 0 ppm

1.00  
0.98  
1.98  
2.00  
1.01  
2.00  
3.00

LJX-1g

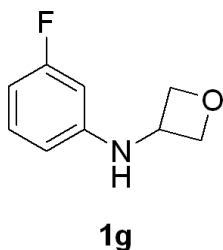

7.260  
7.143  
7.126  
7.122  
7.106  
7.102  
7.085  
6.473  
6.471  
6.467  
6.465  
6.451  
6.445  
6.431  
6.429  
6.425  
6.423  
6.286  
6.285  
6.281  
6.279  
6.266  
6.260  
6.259  
6.259  
6.186  
6.181  
6.175  
6.158  
6.153  
6.147  
5.011  
4.995  
4.978  
4.622  
4.606  
4.591  
4.577  
4.561  
4.532  
4.516  
4.502  
4.312

Current Data Parameters  
NAME 20230709-400M  
EXPNO 7  
PROCNO 1

F2 - Acquisition Parameters  
Date\_ 20230708  
Time 16.22  
INSTRUM spect  
PROBHD 5 mm PADUL 13C  
PULPROG zg30  
TD 65536  
SOLVENT CDC13  
NS 6  
DS 2  
SWH 8223.685 Hz  
FIDRES 0.125483 Hz  
AQ 3.9845889 sec  
RG 113.67  
DW 60.800 usec  
DE 6.50 usec  
TE 290.7 K  
D1 1.00000000 sec  
TD0 1

==== CHANNEL f1 =====  
NUC1 1H  
P1 9.90 usec  
PLW1 23.00000000 W  
SFO1 400.1924713 MHz

F2 - Processing parameters  
SI 65536  
SF 400.1900141 MHz  
WDW EM  
SSB 0  
LB 0.30 Hz  
GB 0  
PC 1.00

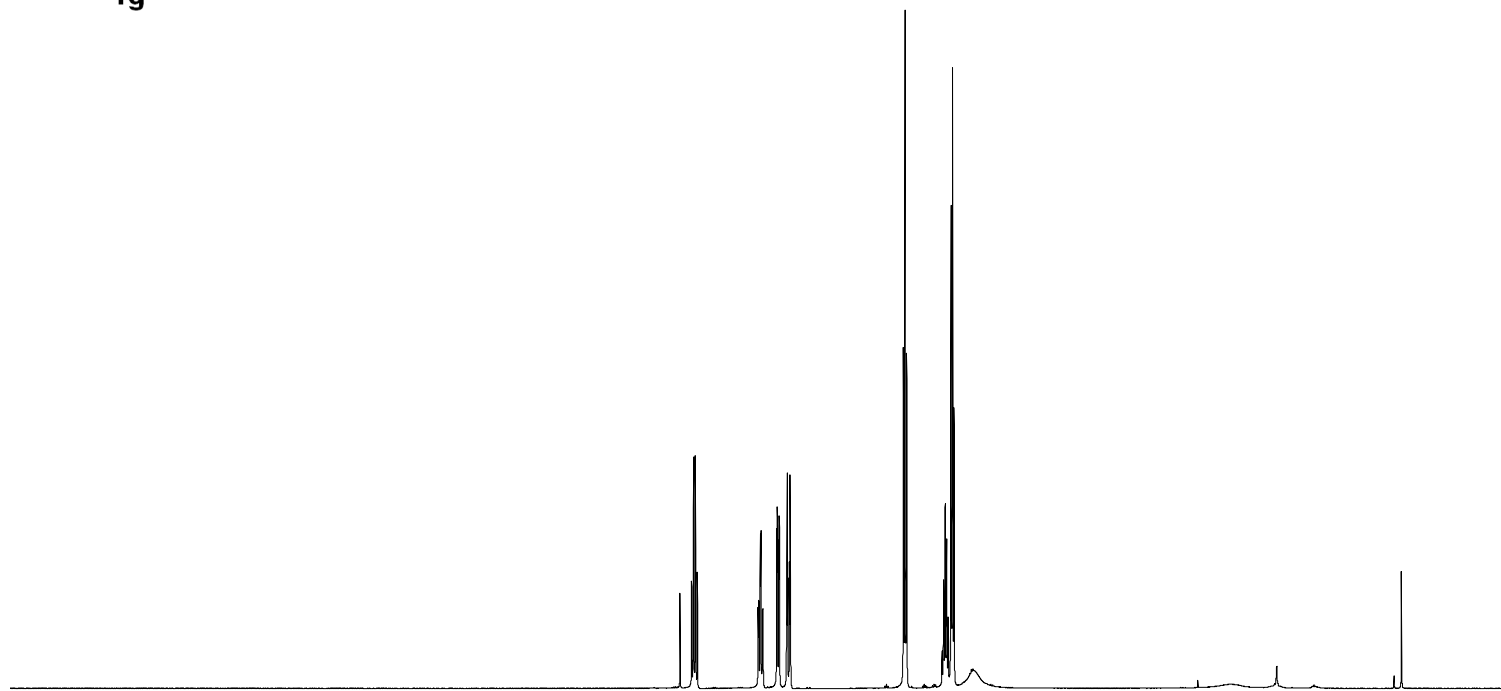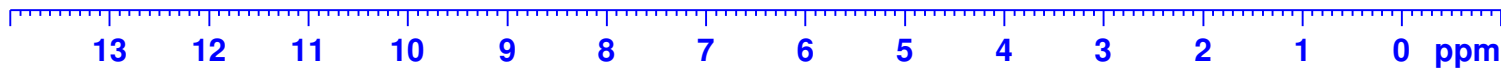

0.98  
0.98  
1.00  
0.97  
2.00  
1.04  
2.01

LJX-1h

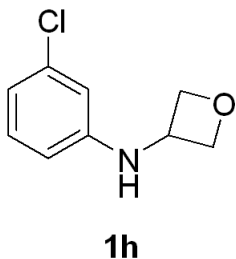

7.260  
7.108  
7.088  
7.068  
6.738  
6.736  
6.733  
6.731  
6.718  
6.716  
6.713  
6.712  
6.453  
6.447  
6.442  
6.388  
6.387  
6.383  
6.381  
6.368  
6.366  
6.362  
6.361  
5.013  
4.997  
4.980  
4.622  
4.606  
4.591  
4.576  
4.560  
4.523  
4.508  
4.493  
4.255

Current Data Parameters  
NAME 20230709-400M  
EXPNO 8  
PROCNO 1

F2 - Acquisition Parameters  
Date\_ 20230708  
Time 16.25  
INSTRUM spect  
PROBHD 5 mm PADUL 13C  
PULPROG zg30  
TD 65536  
SOLVENT CDCl3  
NS 6  
DS 2  
SWH 8223.685 Hz  
FIDRES 0.125483 Hz  
AQ 3.9845889 sec  
RG 125.76  
DW 60.800 usec  
DE 6.50 usec  
TE 290.7 K  
D1 1.00000000 sec  
TD0 1

==== CHANNEL f1 =====  
NUC1 1H  
P1 9.90 usec  
PLW1 23.00000000 W  
SFO1 400.1924713 MHz

F2 - Processing parameters  
SI 65536  
SF 400.1900141 MHz  
WDW EM  
SSB 0  
LB 0.30 Hz  
GB 0  
PC 1.00

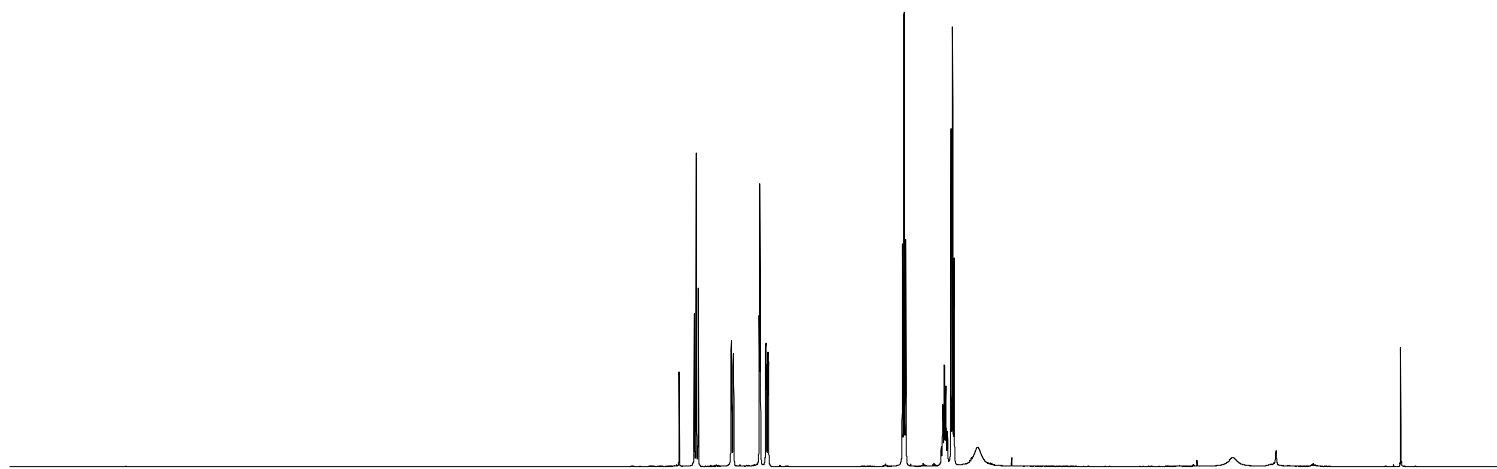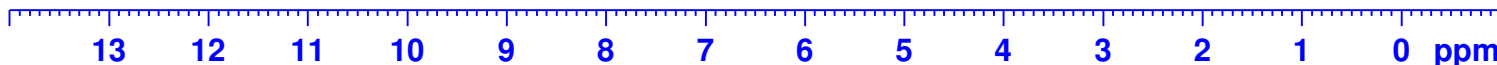

0.99  
0.95  
0.96  
0.98  
2.00  
1.04  
2.01



LJX-1i

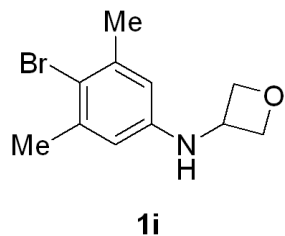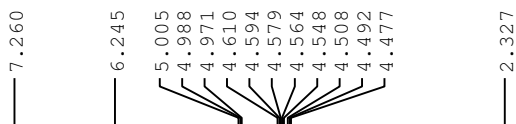

Current Data Parameters  
NAME 20230709-400M  
EXPNO 9  
PROCNO 1

F2 - Acquisition Parameters  
Date\_ 20230708  
Time 16.29  
INSTRUM spect  
PROBHD 5 mm PADUL 13C  
PULPROG zg30  
TD 65536  
SOLVENT CDCl3  
NS 6  
DS 2  
SWH 8223.685 Hz  
FIDRES 0.125483 Hz  
AQ 3.9845889 sec  
RG 113.67  
DW 60.800 usec  
DE 6.50 usec  
TE 290.7 K  
D1 1.00000000 sec  
TD0 1

==== CHANNEL f1 =====  
NUC1 1H  
P1 9.90 usec  
PLW1 23.00000000 W  
SFO1 400.1924713 MHz

F2 - Processing parameters  
SI 65536  
SF 400.1900140 MHz  
WDW EM  
SSB 0  
LB 0.30 Hz  
GB 0  
PC 1.00

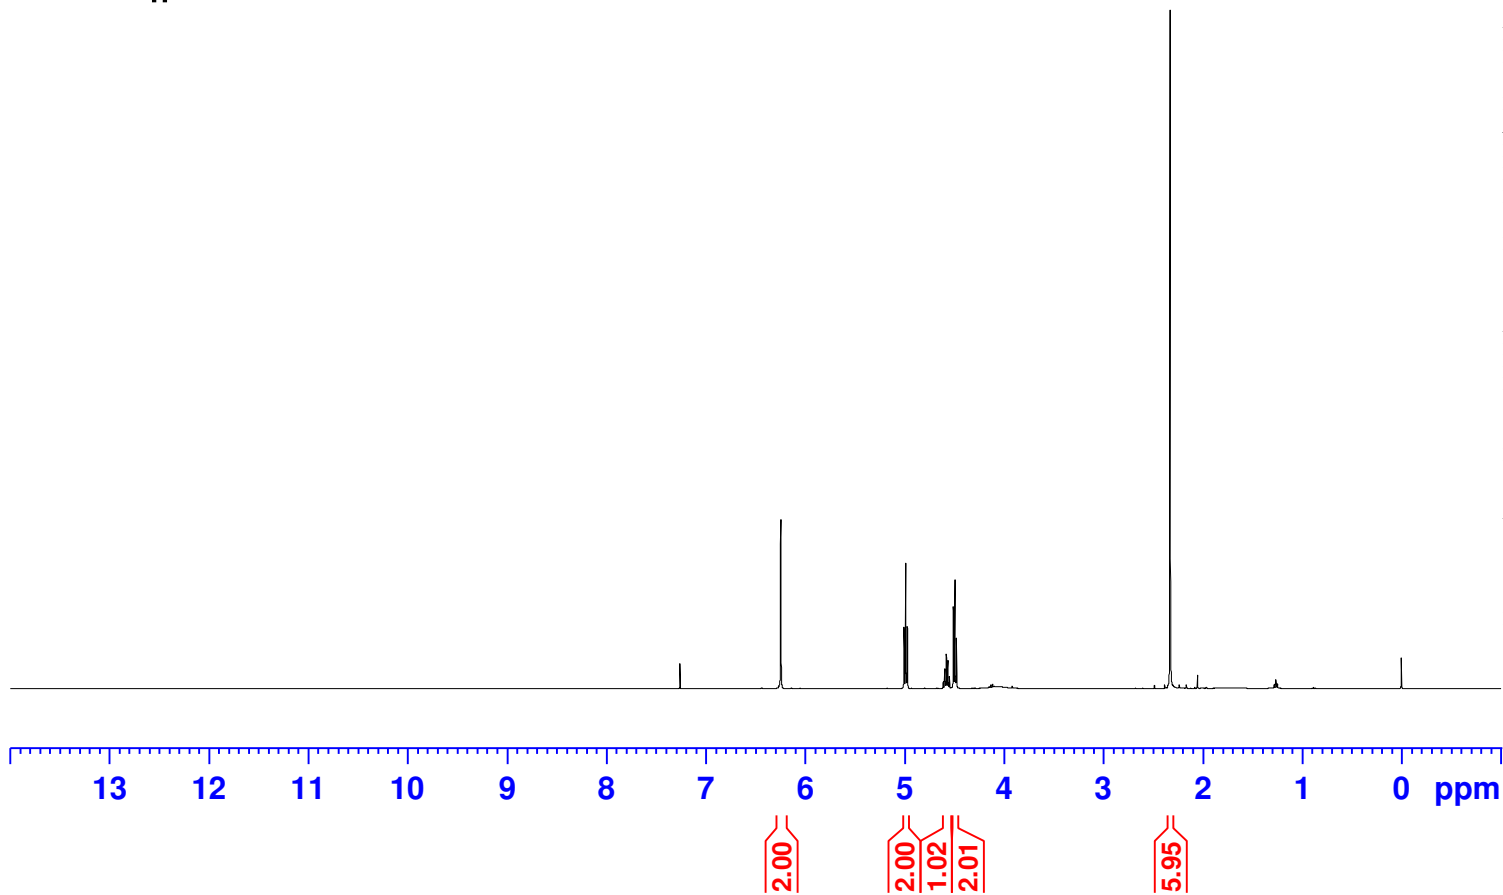

ljx-5

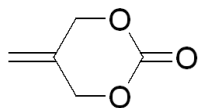

5

7.259  
5.307  
4.849

Current Data Parameters  
NAME 20230720-300M  
EXPNO 342  
PROCNO 1

F2 - Acquisition Parameters  
Date\_ 20230720  
Time 11.35  
INSTRUM spect  
PROBHD 5 mm PABBO BB-  
PULPROG zg30  
TD 65536  
SOLVENT CDC13  
NS 16  
DS 2  
SWH 6009.615 Hz  
FIDRES 0.091699 Hz  
AQ 5.4525952 sec  
RG 203  
DW 83.200 usec  
DE 6.50 usec  
TE 297.7 K  
D1 1.00000000 sec  
TD0 1

==== CHANNEL f1 =====  
SFO1 300.1318534 MHz  
NUC1 1H  
P1 10.00 usec  
PLW1 14.00000000 W

F2 - Processing parameters  
SI 65536  
SF 300.1300065 MHz  
WDW EM  
SSB 0  
LB 0.30 Hz  
GB 0  
PC 1.00

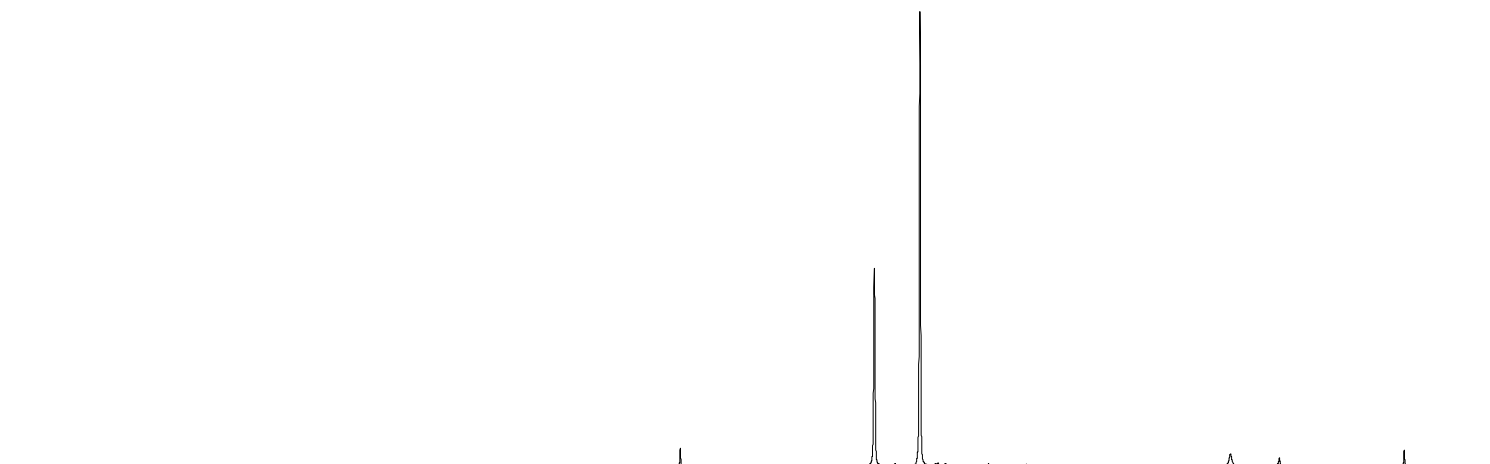

2.00  
4.00

13 12 11 10 9 8 7 6 5 4 3 2 1 0 ppm

ljx-2a

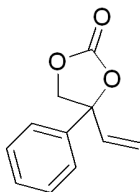

2a

7.443  
7.427  
7.408  
7.392  
7.375  
7.366  
7.363  
7.346  
7.259  
6.190  
6.163  
6.147  
6.120  
5.430  
5.403  
5.387  
4.667  
4.646  
4.583  
4.562

Current Data Parameters  
NAME 20230721-400M  
EXPNO 9  
PROCNO 1

F2 - Acquisition Parameters  
Date\_ 20230720  
Time 22.17  
INSTRUM spect  
PROBHD 5 mm PADUL 13C  
PULPROG zg30  
TD 65536  
SOLVENT CDC13  
NS 6  
DS 2  
SWH 8223.685 Hz  
FIDRES 0.125483 Hz  
AQ 3.9845889 sec  
RG 75.43  
DW 60.800 usec  
DE 6.50 usec  
TE 294.2 K  
D1 1.00000000 sec  
TD0 1

==== CHANNEL f1 =====  
NUC1 1H  
P1 9.90 usec  
PLW1 23.00000000 W  
SFO1 400.1924713 MHz

F2 - Processing parameters  
SI 65536  
SF 400.1900143 MHz  
WDW EM  
SSB 0  
LB 0.30 Hz  
GB 0  
PC 1.00

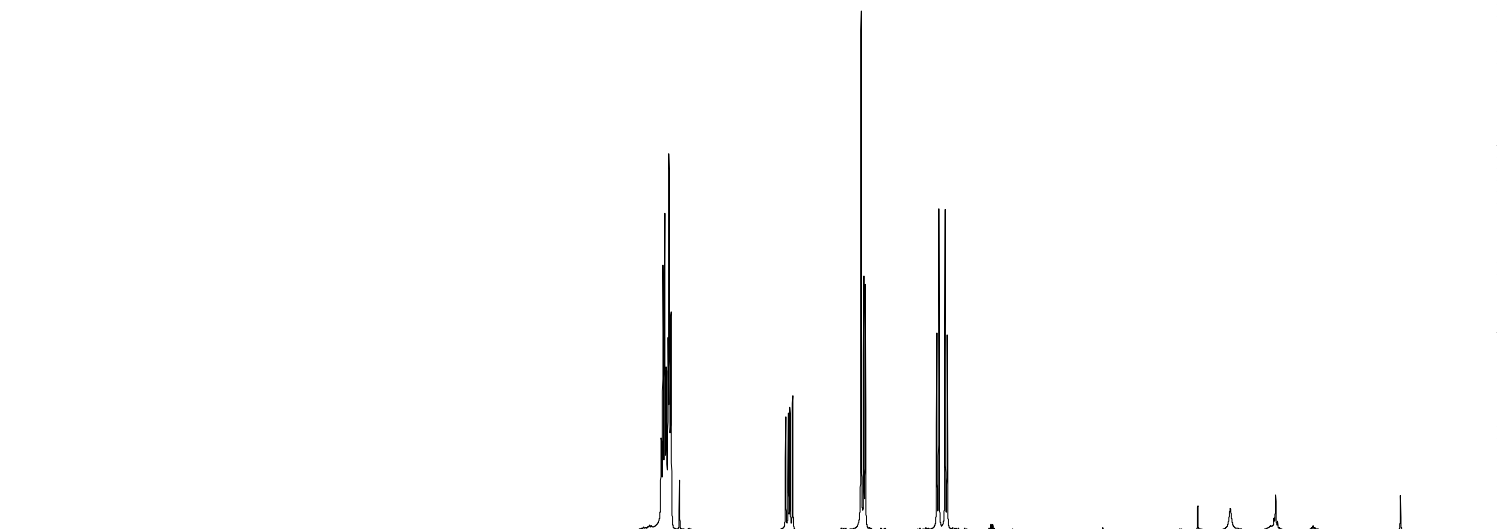

13 12 11 10 9 8 7 6 5 4 3 2 1 0 ppm

5.11  
1.00  
1.03  
0.98  
1.04  
1.04

ljx-2b

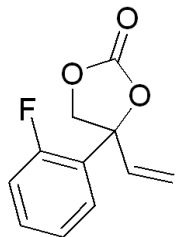

2b

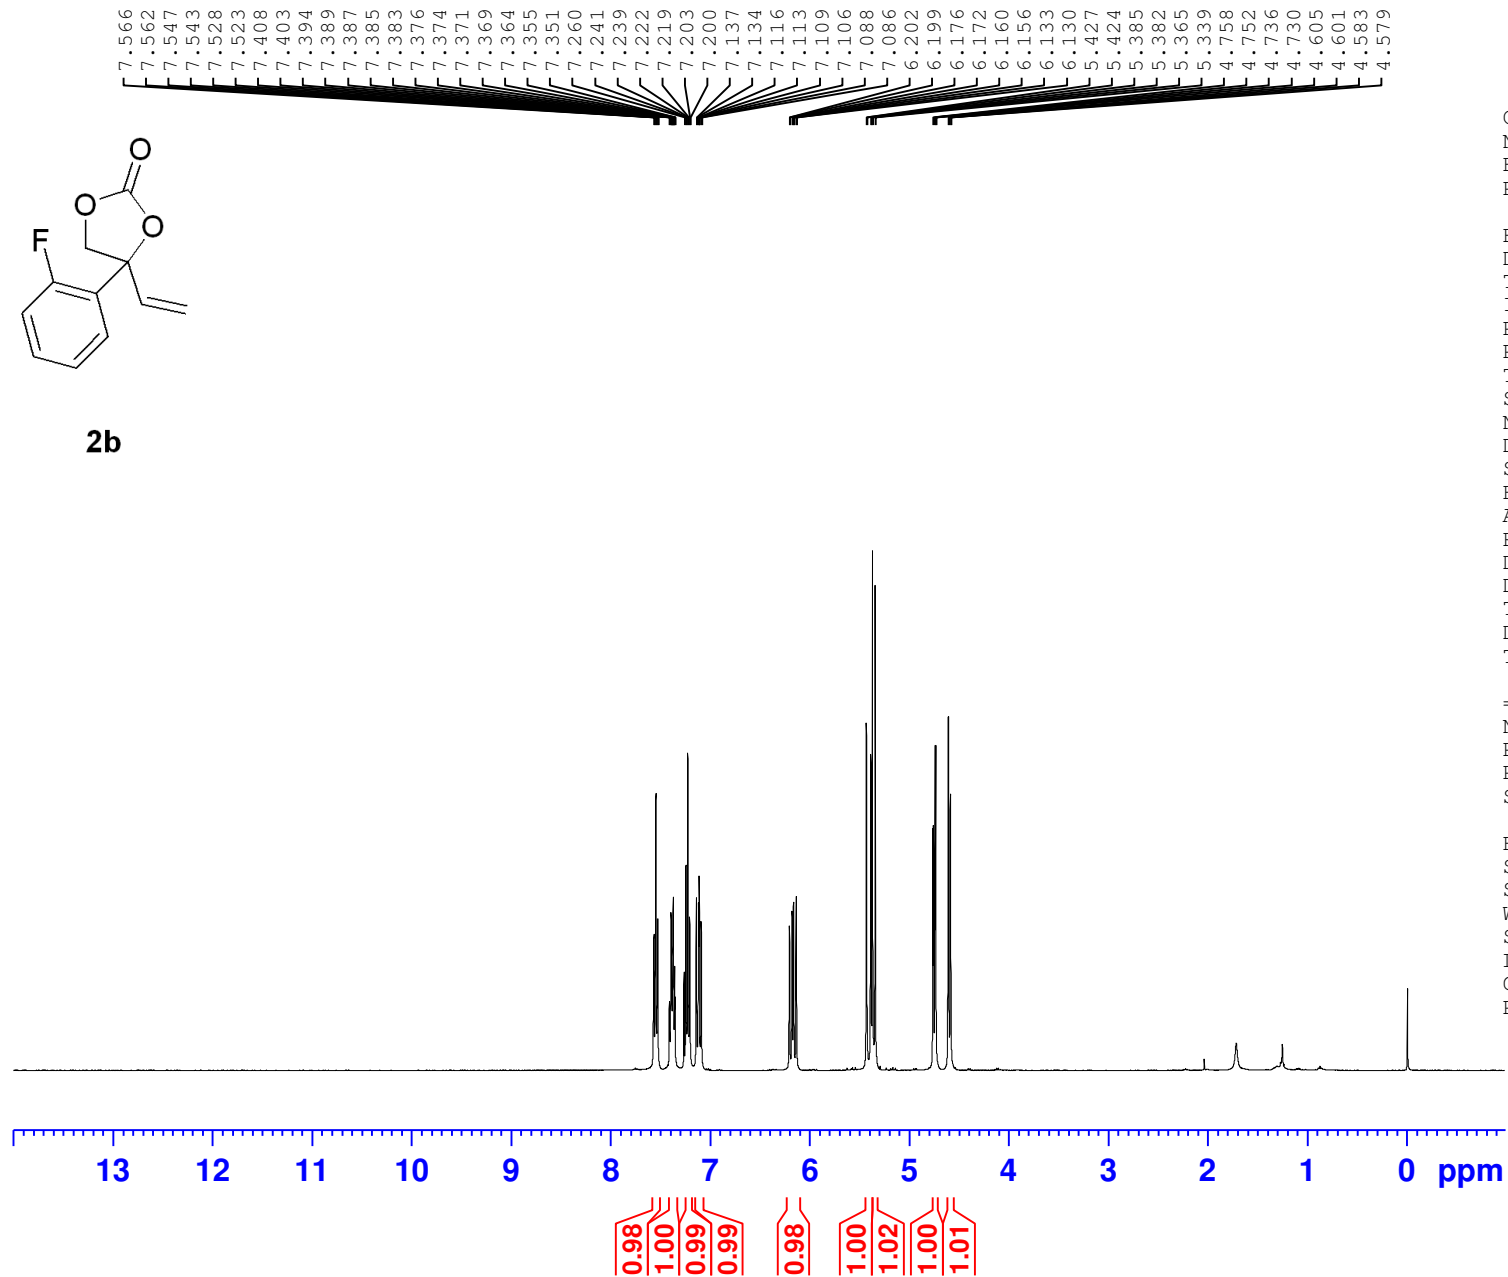

Current Data Parameters  
NAME 20230721-400M  
EXPNO 10  
PROCNO 1

F2 - Acquisition Parameters  
Date\_ 20230720  
Time 22.21  
INSTRUM spect  
PROBHD 5 mm PADUL 13C  
PULPROG zg30  
TD 65536  
SOLVENT CDC13  
NS 6  
DS 2  
SWH 8223.685 Hz  
FIDRES 0.125483 Hz  
AQ 3.9845889 sec  
RG 75.43  
DW 60.800 usec  
DE 6.50 usec  
TE 294.2 K  
D1 1.00000000 sec  
TD0 1

==== CHANNEL f1 =====  
NUC1 1H  
P1 9.90 usec  
PLW1 23.00000000 W  
SFO1 400.1924713 MHz

F2 - Processing parameters  
SI 65536  
SF 400.1900140 MHz  
WDW EM  
SSB 0  
LB 0.30 Hz  
GB 0  
PC 1.00

ljx-2c

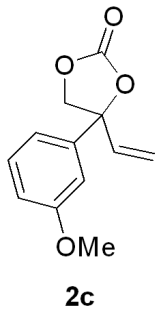

7.350  
7.344  
7.331  
7.327  
7.317  
7.309  
7.260  
6.901  
6.887  
6.881  
6.167  
6.140  
6.124  
6.097  
5.441  
5.418  
5.398  
5.391  
4.649  
4.628  
4.559  
4.538  
3.813

Current Data Parameters  
NAME 20230721-400M  
EXPNO 11  
PROCNO 1

F2 - Acquisition Parameters  
Date\_ 20230720  
Time 22.26  
INSTRUM spect  
PROBHD 5 mm PADUL 13C  
PULPROG zg30  
TD 65536  
SOLVENT CDCl3  
NS 6  
DS 2  
SWH 8223.685 Hz  
FIDRES 0.125483 Hz  
AQ 3.9845889 sec  
RG 68.24  
DW 60.800 usec  
DE 6.50 usec  
TE 294.3 K  
D1 1.00000000 sec  
TD0 1

==== CHANNEL f1 =====  
NUC1 1H  
P1 9.90 usec  
PLW1 23.00000000 W  
SFO1 400.1924713 MHz

F2 - Processing parameters  
SI 65536  
SF 400.1900141 MHz  
WDW EM  
SSB 0  
LB 0.30 Hz  
GB 0  
PC 1.00

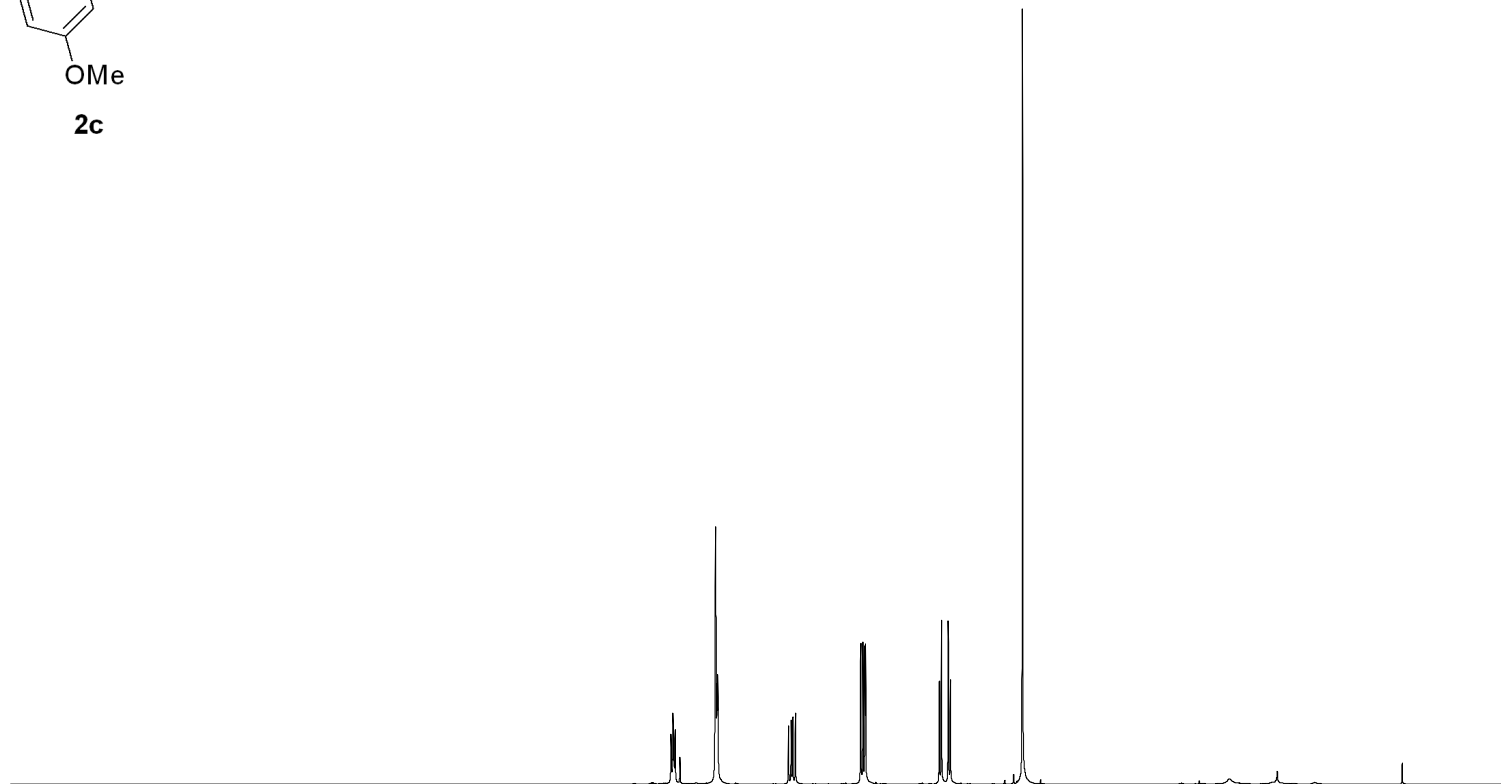

13 12 11 10 9 8 7 6 5 4 3 2 1 0 ppm

1.00  
3.04  
0.99  
2.07  
2.09  
3.07

ljx-2d

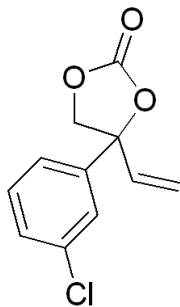

2d

7.389  
7.355  
7.260  
7.242  
7.237  
7.228  
6.154  
6.128  
6.112  
6.085  
5.459  
5.442  
5.432  
5.400  
4.664  
4.642  
4.548  
4.526

Current Data Parameters  
NAME 20230721-400M  
EXPNO 12  
PROCNO 1

F2 - Acquisition Parameters  
Date\_ 20230720  
Time 22.30  
INSTRUM spect  
PROBHD 5 mm PADUL 13C  
PULPROG zg30  
TD 65536  
SOLVENT CDC13  
NS 6  
DS 2  
SWH 8223.685 Hz  
FIDRES 0.125483 Hz  
AQ 3.9845889 sec  
RG 75.43  
DW 60.800 usec  
DE 6.50 usec  
TE 294.2 K  
D1 1.00000000 sec  
TD0 1

==== CHANNEL f1 =====  
NUC1 1H  
P1 9.90 usec  
PLW1 23.00000000 W  
SFO1 400.1924713 MHz

F2 - Processing parameters  
SI 65536  
SF 400.1900142 MHz  
WDW EM  
SSB 0  
LB 0.30 Hz  
GB 0  
PC 1.00

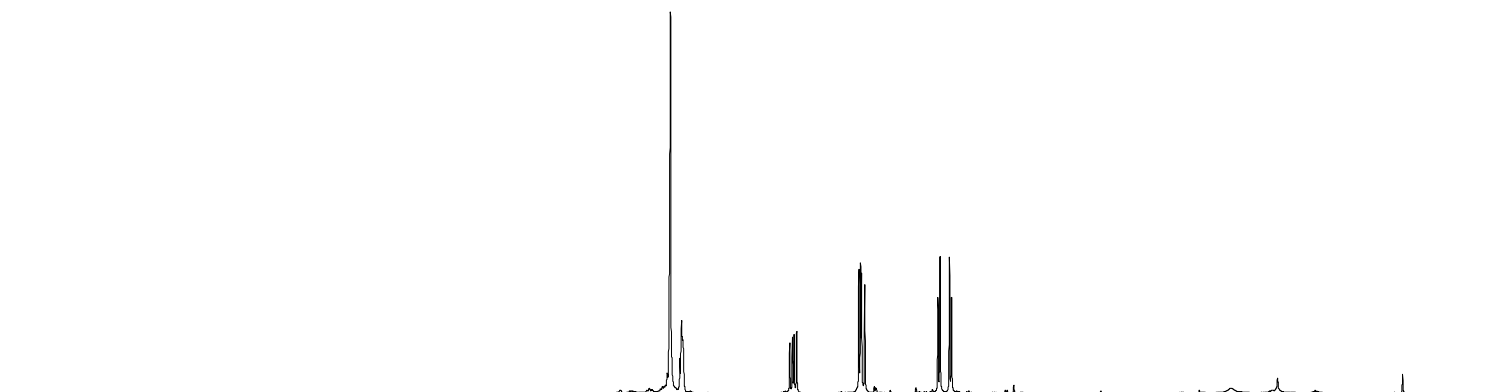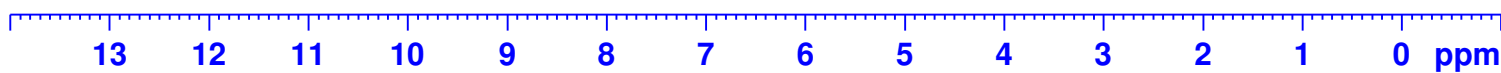

3.02  
1.01  
1.00  
2.05  
2.09

ljx-2e

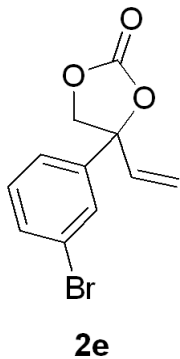

7.522  
7.517  
7.511  
7.504  
7.326  
7.307  
7.295  
7.289  
7.276  
7.271  
7.260  
6.152  
6.125  
6.109  
6.082  
5.463  
5.446  
5.436  
5.403  
4.661  
4.639  
4.546  
4.524

Current Data Parameters  
NAME 20230721-400M  
EXPNO 13  
PROCNO 1

F2 - Acquisition Parameters  
Date\_ 20230720  
Time 22.34  
INSTRUM spect  
PROBHD 5 mm PADUL 13C  
PULPROG zg30  
TD 65536  
SOLVENT CDC13  
NS 6  
DS 2  
SWH 8223.685 Hz  
FIDRES 0.125483 Hz  
AQ 3.9845889 sec  
RG 100.49  
DW 60.800 usec  
DE 6.50 usec  
TE 294.2 K  
D1 1.00000000 sec  
TD0 1

==== CHANNEL f1 =====  
NUC1 1H  
P1 9.90 usec  
PLW1 23.00000000 W  
SFO1 400.1924713 MHz

F2 - Processing parameters  
SI 65536  
SF 400.1900142 MHz  
WDW EM  
SSB 0  
LB 0.30 Hz  
GB 0  
PC 1.00

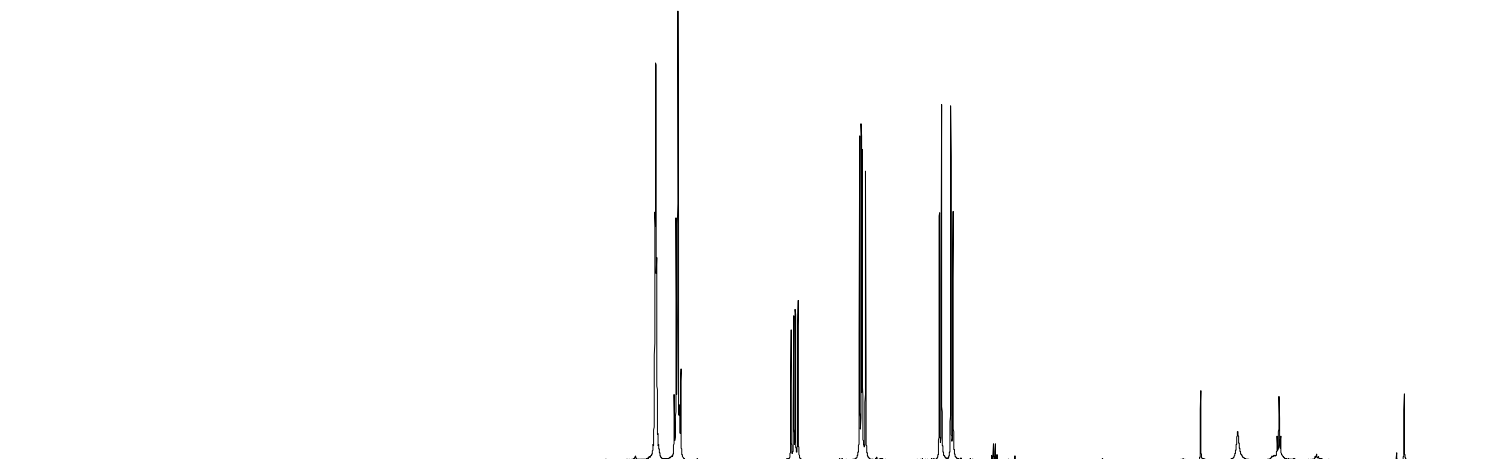

13 12 11 10 9 8 7 6 5 4 3 2 1 0 ppm

2.03  
2.03  
1.00  
2.06  
1.05  
1.05

ljx-2f

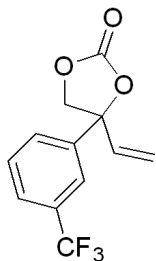

2f

7.662  
7.651  
7.613  
7.584  
7.571  
7.259  
6.190  
6.163  
6.147  
6.120  
5.493  
5.466  
5.459  
5.416  
4.719  
4.698  
4.576  
4.554

Current Data Parameters  
NAME 20230721-400M  
EXPNO 23  
PROCNO 1

F2 - Acquisition Parameters  
Date\_ 20230720  
Time 23.15  
INSTRUM spect  
PROBHD 5 mm PADUL 13C  
PULPROG zg30  
TD 65536  
SOLVENT CDC13  
NS 6  
DS 2  
SWH 8223.685 Hz  
FIDRES 0.125483 Hz  
AQ 3.9845889 sec  
RG 113.67  
DW 60.800 usec  
DE 6.50 usec  
TE 294.4 K  
D1 1.00000000 sec  
TD0 1

==== CHANNEL f1 =====  
NUC1 1H  
P1 9.90 usec  
PLW1 23.00000000 W  
SFO1 400.1924713 MHz

F2 - Processing parameters  
SI 65536  
SF 400.1900144 MHz  
WDW EM  
SSB 0  
LB 0.30 Hz  
GB 0  
PC 1.00

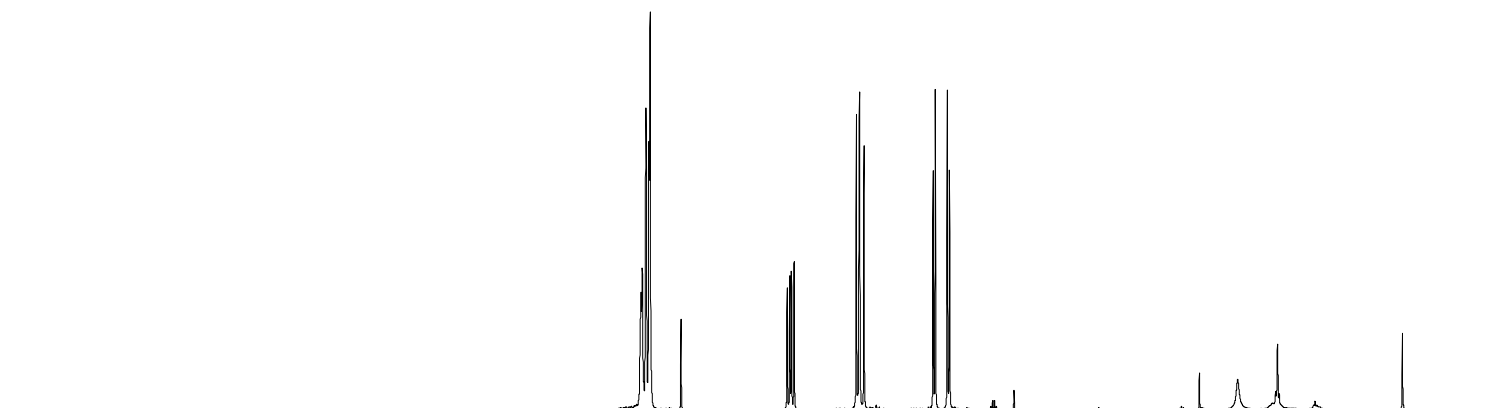

13 12 11 10 9 8 7 6 5 4 3 2 1 0 ppm

4.09  
1.00  
2.07  
1.04  
1.04



ljx-2g

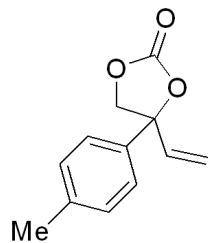

2g

7.260  
7.252  
7.237  
7.213  
6.178  
6.152  
6.135  
6.109  
5.424  
5.420  
5.393  
5.382  
4.636  
4.615  
4.570  
4.549  
2.365

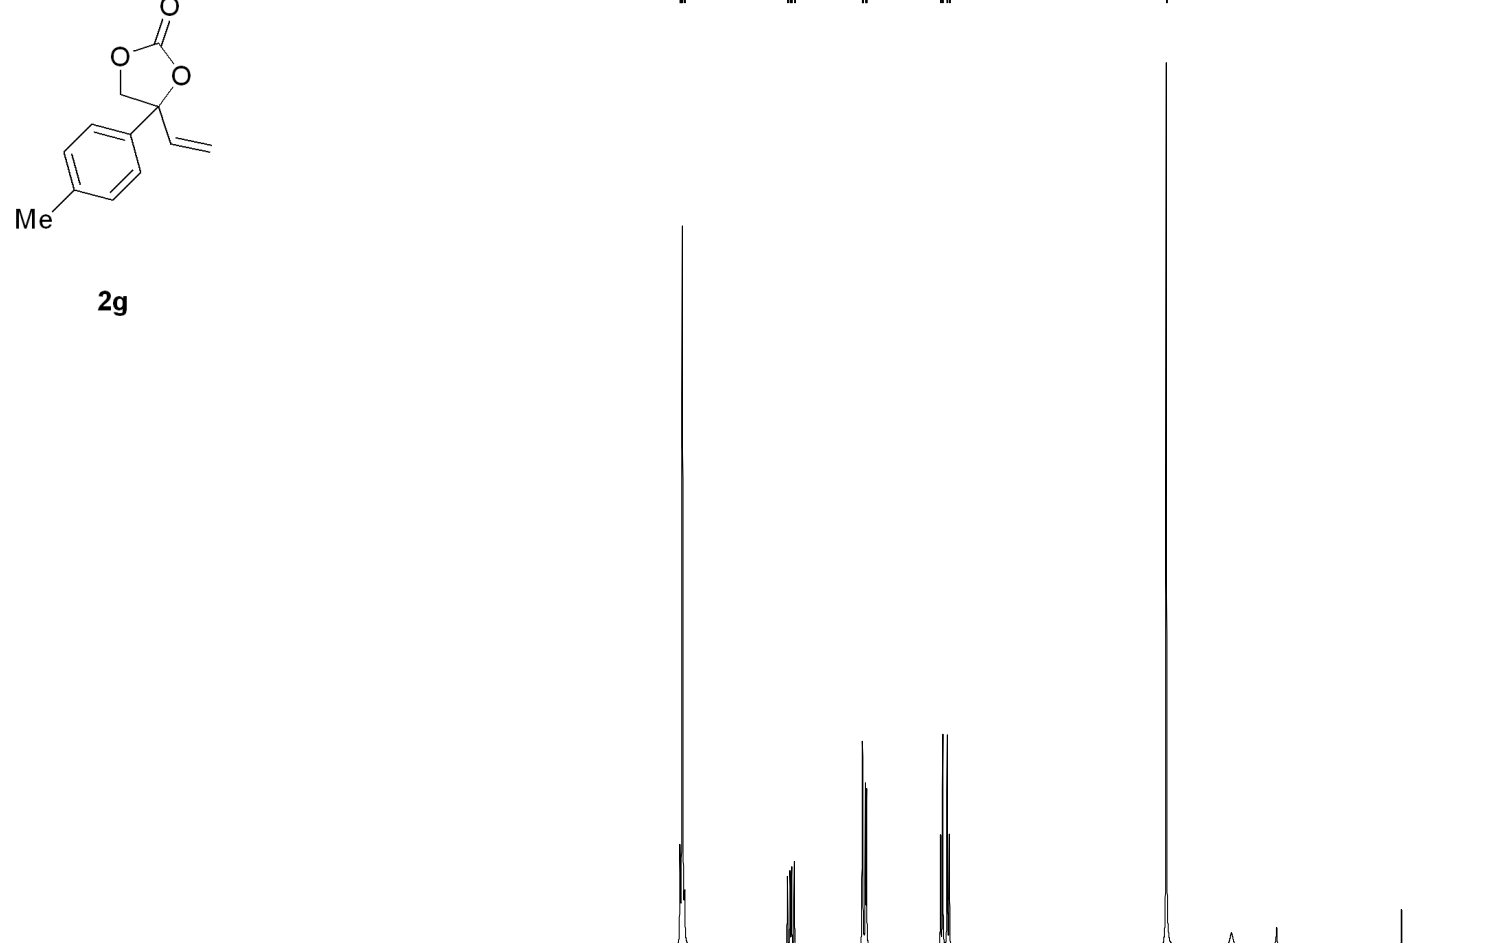

Current Data Parameters  
NAME 20230721-400M  
EXPNO 24  
PROCNO 1

F2 - Acquisition Parameters  
Date\_ 20230720  
Time 23.19  
INSTRUM spect  
PROBHD 5 mm PADUL 13C  
PULPROG zg30  
TD 65536  
SOLVENT CDC13  
NS 6  
DS 2  
SWH 8223.685 Hz  
FIDRES 0.125483 Hz  
AQ 3.9845889 sec  
RG 90.23  
DW 60.800 usec  
DE 6.50 usec  
TE 294.3 K  
D1 1.00000000 sec  
TD0 1

==== CHANNEL f1 =====  
NUC1 1H  
P1 9.90 usec  
PLW1 23.00000000 W  
SFO1 400.1924713 MHz

F2 - Processing parameters  
SI 65536  
SF 400.1900138 MHz  
WDW EM  
SSB 0  
LB 0.30 Hz  
GB 0  
PC 1.00

4.02  
1.00  
2.06  
2.09  
3.14

ljx-2h

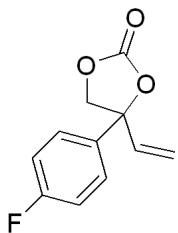

2h

7.365  
7.361  
7.353  
7.348  
7.343  
7.335  
7.331  
7.136  
7.115  
7.093  
6.169  
6.142  
6.126  
6.099  
5.452  
5.425  
5.421  
5.378  
4.654  
4.632  
4.560  
4.538

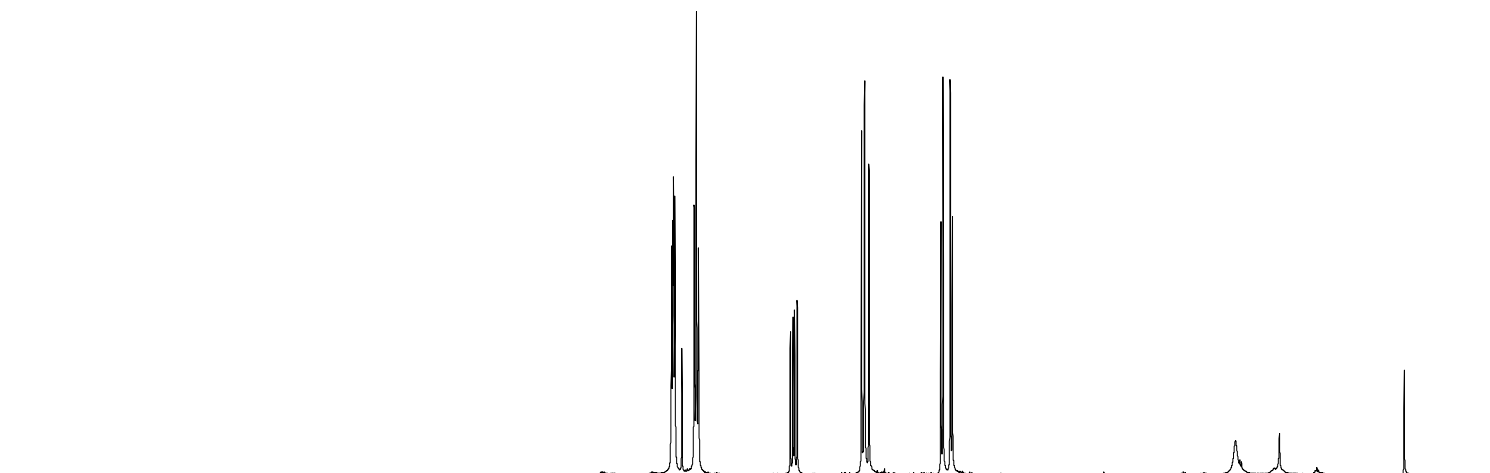

Current Data Parameters  
NAME 20230722-400M  
EXPNO 28  
PROCNO 1

F2 - Acquisition Parameters  
Date\_ 20230721  
Time 23.10  
INSTRUM spect  
PROBHD 5 mm PADUL 13C  
PULPROG zg30  
TD 65536  
SOLVENT CDC13  
NS 6  
DS 0  
SWH 8223.685 Hz  
FIDRES 0.125483 Hz  
AQ 3.9845889 sec  
RG 113.67  
DW 60.800 usec  
DE 6.50 usec  
TE 294.0 K  
D1 1.00000000 sec  
TD0 1

==== CHANNEL f1 =====  
NUC1 1H  
P1 9.90 usec  
PLW1 23.00000000 W  
SFO1 400.1924713 MHz

F2 - Processing parameters  
SI 65536  
SF 400.1900141 MHz  
WDW EM  
SSB 0  
LB 0.30 Hz  
GB 0  
PC 1.00

13 12 11 10 9 8 7 6 5 4 3 2 1 0 ppm

2.02  
2.07  
1.00  
2.08  
2.08

ljx-2i

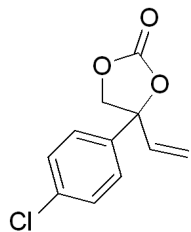

2i

7.412  
7.407  
7.395  
7.390  
7.309  
7.304  
7.292  
7.287  
7.259  
6.156  
6.130  
6.114  
6.087  
5.453  
5.426  
5.421  
5.378  
4.655  
4.634  
4.543  
4.521

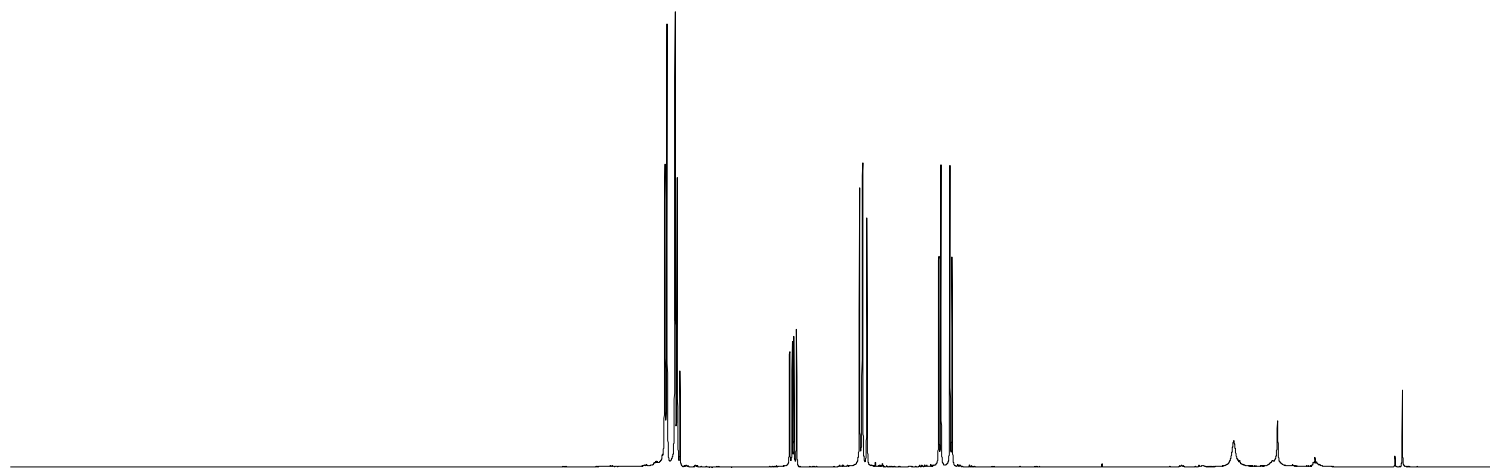

Current Data Parameters  
NAME 20230722-400M  
EXPNO 3  
PROCNO 1

F2 - Acquisition Parameters  
Date\_ 20230721  
Time 21.34  
INSTRUM spect  
PROBHD 5 mm PADUL 13C  
PULPROG zg30  
TD 65536  
SOLVENT CDC13  
NS 6  
DS 0  
SWH 8223.685 Hz  
FIDRES 0.125483 Hz  
AQ 3.9845889 sec  
RG 100.49  
DW 60.800 usec  
DE 6.50 usec  
TE 293.7 K  
D1 1.00000000 sec  
TD0 1

==== CHANNEL f1 =====  
NUC1 1H  
P1 9.90 usec  
PLW1 23.00000000 W  
SFO1 400.1924713 MHz

F2 - Processing parameters  
SI 65536  
SF 400.1900143 MHz  
WDW EM  
SSB 0  
LB 0.30 Hz  
GB 0  
PC 1.00

13 12 11 10 9 8 7 6 5 4 3 2 1 0 ppm

2.00  
2.00  
0.99  
2.03  
2.04

ljx-2j

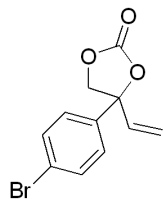

2j

7.566  
7.544  
7.260  
7.246  
7.225  
6.152  
6.125  
6.109  
6.082  
5.451  
5.424  
5.420  
5.377  
4.654  
4.633  
4.538  
4.517

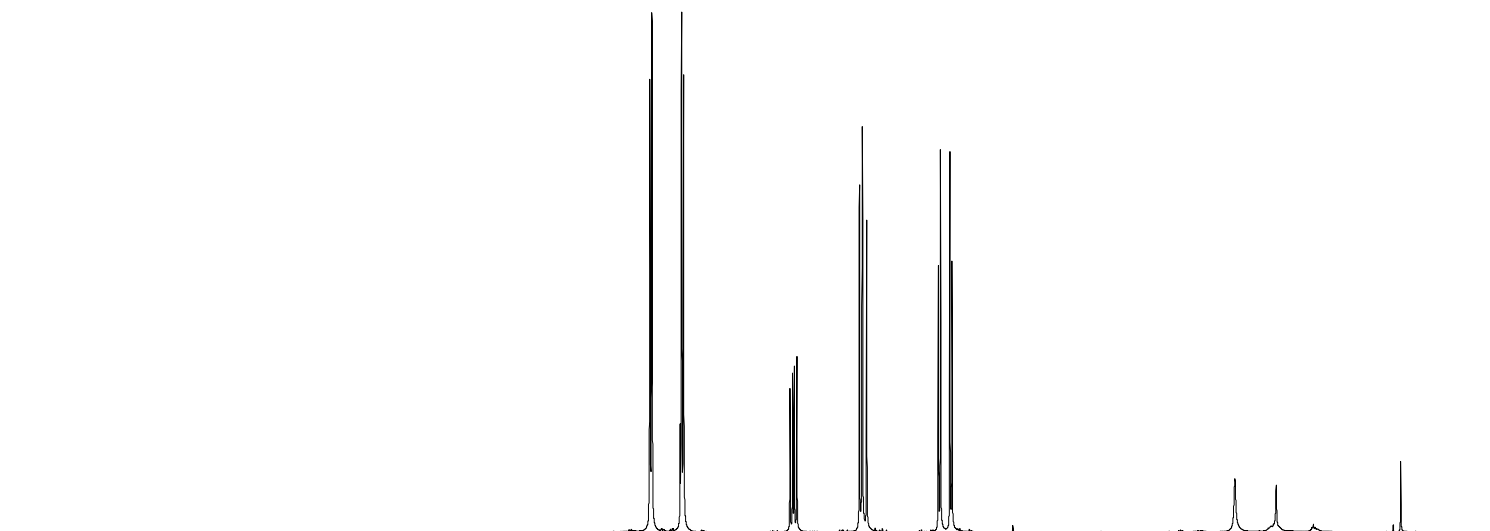

Current Data Parameters  
NAME 20230722-400M  
EXPNO 4  
PROCNO 1

F2 - Acquisition Parameters  
Date\_ 20230721  
Time 21.38  
INSTRUM spect  
PROBHD 5 mm PADUL 13C  
PULPROG zg30  
TD 65536  
SOLVENT CDCl3  
NS 6  
DS 0  
SWH 8223.685 Hz  
FIDRES 0.125483 Hz  
AQ 3.9845889 sec  
RG 100.49  
DW 60.800 usec  
DE 6.50 usec  
TE 293.7 K  
D1 1.00000000 sec  
TD0 1

==== CHANNEL f1 =====  
NUC1 1H  
P1 9.90 usec  
PLW1 23.00000000 W  
SFO1 400.1924713 MHz

F2 - Processing parameters  
SI 65536  
SF 400.1900140 MHz  
WDW EM  
SSB 0  
LB 0.30 Hz  
GB 0  
PC 1.00

13 12 11 10 9 8 7 6 5 4 3 2 1 0 ppm

2.00  
2.03  
1.00  
2.05  
2.09

ljx-2k

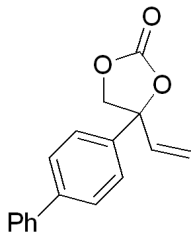

2k

7.662  
7.641  
7.597  
7.579  
7.482  
7.464  
7.449  
7.445  
7.429  
7.402  
7.384  
7.366  
7.259  
6.232  
6.206  
6.189  
6.163  
5.491  
5.471  
5.448  
5.444  
4.696  
4.675  
4.631  
4.610

Current Data Parameters  
NAME 20230722-400M  
EXPNO 10  
PROCNO 1

F2 - Acquisition Parameters  
Date\_ 20230721  
Time 22.01  
INSTRUM spect  
PROBHD 5 mm PADUL 13C  
PULPROG zg30  
TD 65536  
SOLVENT CDCl3  
NS 6  
DS 0  
SWH 8223.685 Hz  
FIDRES 0.125483 Hz  
AQ 3.9845889 sec  
RG 75.43  
DW 60.800 usec  
DE 6.50 usec  
TE 293.8 K  
D1 1.00000000 sec  
TD0 1

==== CHANNEL f1 =====  
NUC1 1H  
P1 9.90 usec  
PLW1 23.00000000 W  
SFO1 400.1924713 MHz

F2 - Processing parameters  
SI 65536  
SF 400.1900142 MHz  
WDW EM  
SSB 0  
LB 0.30 Hz  
GB 0  
PC 1.00

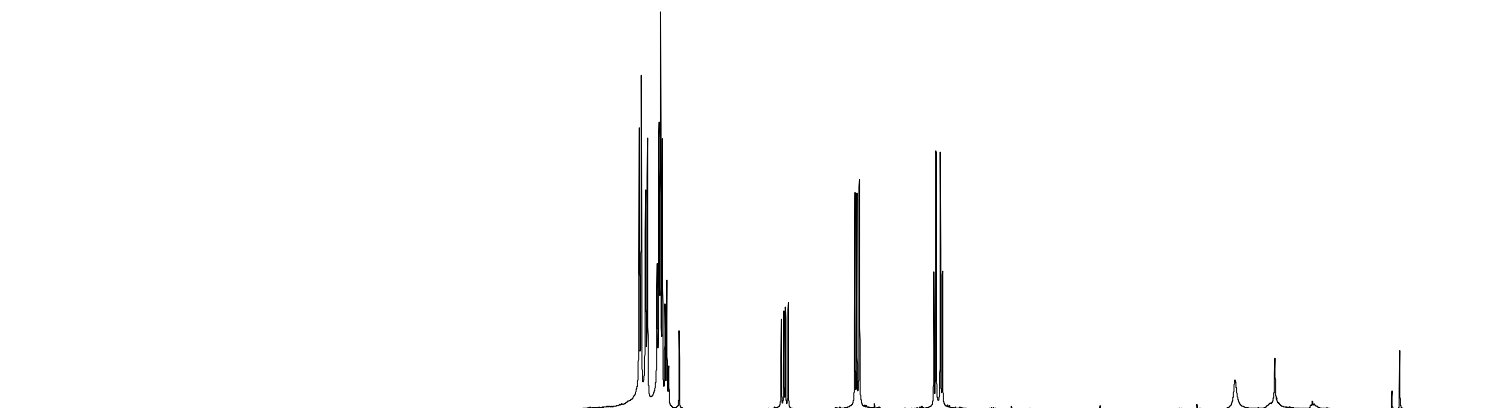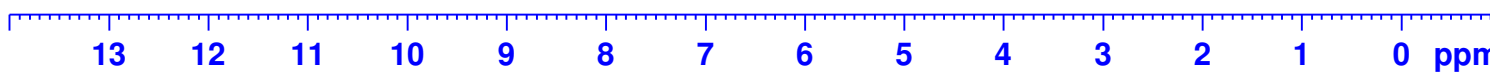

2.06  
2.08  
5.06  
1.00  
2.02  
2.08

ljx-21

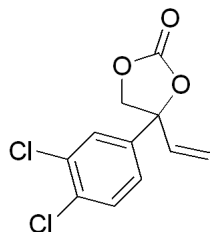

21

7.514  
7.493  
7.466  
7.461  
7.260  
7.212  
7.207  
7.191  
7.186  
6.138  
6.111  
6.095  
6.068  
5.482  
5.455  
5.446  
5.403  
4.660  
4.639  
4.530  
4.508

Current Data Parameters  
NAME 20230722-400M  
EXPNO 14  
PROCNO 1

F2 - Acquisition Parameters  
Date\_ 20230721  
Time 22.18  
INSTRUM spect  
PROBHD 5 mm PADUL 13C  
PULPROG zg30  
TD 65536  
SOLVENT CDC13  
NS 6  
DS 0  
SWH 8223.685 Hz  
FIDRES 0.125483 Hz  
AQ 3.9845889 sec  
RG 90.23  
DW 60.800 usec  
DE 6.50 usec  
TE 294.0 K  
D1 1.00000000 sec  
TD0 1

==== CHANNEL f1 =====  
NUC1 1H  
P1 9.90 usec  
PLW1 23.00000000 W  
SFO1 400.1924713 MHz

F2 - Processing parameters  
SI 65536  
SF 400.1900142 MHz  
WDW EM  
SSB 0  
LB 0.30 Hz  
GB 0  
PC 1.00

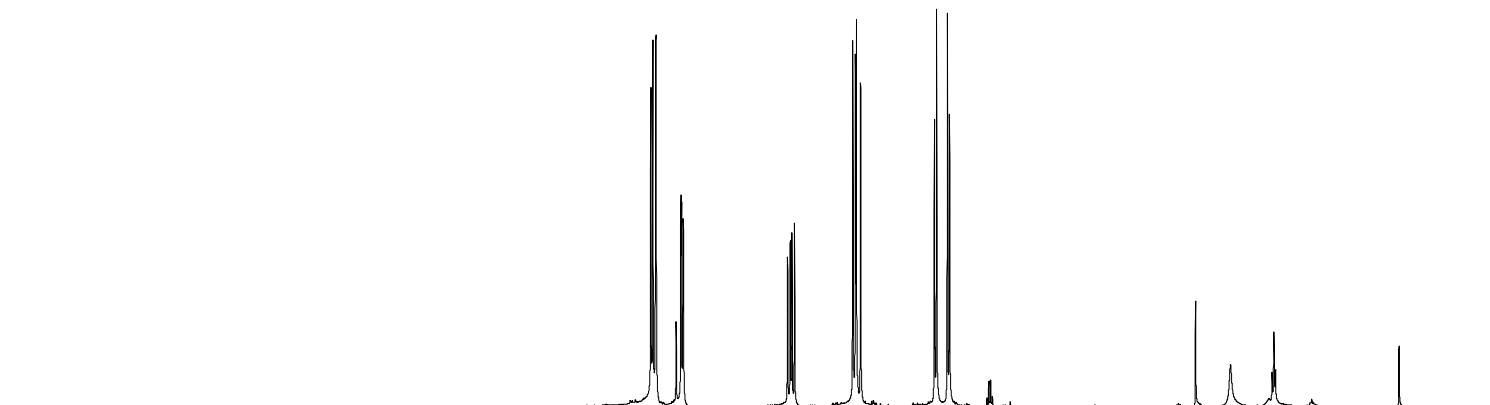

13 12 11 10 9 8 7 6 5 4 3 2 1 0 ppm

2.07  
1.00  
1.00  
2.08  
2.09

1jx-2m

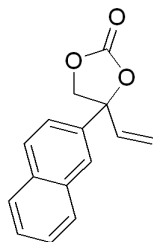

2m

7.918  
7.896  
7.877  
7.872  
7.862  
7.854  
7.847  
7.838  
7.564  
7.556  
7.547  
7.540  
7.532  
7.523  
7.404  
7.399  
7.382  
7.378  
7.260  
6.280  
6.253  
6.237  
6.210  
5.484  
5.482  
5.455  
5.442  
4.743  
4.722  
4.688  
4.667

Current Data Parameters  
NAME 20230722-400M  
EXPNO 13  
PROCNO 1

F2 - Acquisition Parameters  
Date\_ 20230721  
Time 22.13  
INSTRUM spect  
PROBHD 5 mm PADUL 13C  
PULPROG zg30  
TD 65536  
SOLVENT CDC13  
NS 6  
DS 0  
SWH 8223.685 Hz  
FIDRES 0.125483 Hz  
AQ 3.9845889 sec  
RG 90.23  
DW 60.800 usec  
DE 6.50 usec  
TE 293.8 K  
D1 1.00000000 sec  
TD0 1

==== CHANNEL f1 =====  
NUC1 1H  
P1 9.90 usec  
PLW1 23.00000000 W  
SFO1 400.1924713 MHz

F2 - Processing parameters  
SI 65536  
SF 400.1900141 MHz  
WDW EM  
SSB 0  
LB 0.30 Hz  
GB 0  
PC 1.00

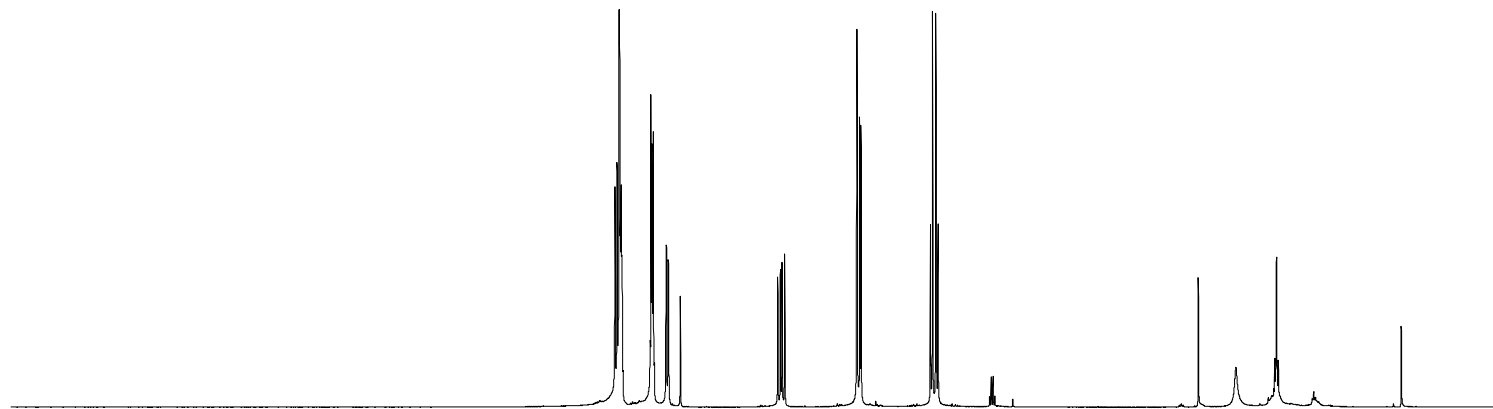

13 12 11 10 9 8 7 6 5 4 3 2 1 0 ppm

4.06  
2.05  
1.01  
1.00  
2.06  
2.08

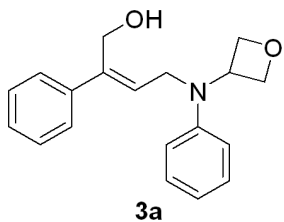

7.379  
7.375  
7.369  
7.357  
7.354  
7.349  
7.336  
7.333  
7.328  
7.315  
7.311  
7.300  
7.297  
7.291  
7.282  
7.278  
7.273  
7.268  
7.261  
7.255  
7.252  
7.249  
7.243  
7.238  
7.233  
6.903  
6.901  
6.885  
6.869  
6.866  
6.864  
6.728  
6.726  
6.706  
6.704  
5.866  
5.850  
5.834  
4.873  
4.865  
4.859  
4.848  
4.843  
4.837  
4.830  
4.823  
4.744  
4.732  
4.724  
4.713  
4.708  
4.706  
4.701  
4.695  
4.688  
4.547  
4.155  
4.139

Current Data Parameters  
NAME LJX-1-39  
EXPNO 1  
PROCNO 1

F2 - Acquisition Parameters

Date\_ 20230729  
Time 4.05 h  
INSTRUM Avance  
PROBHD z116098\_0833 (  
PULPROG zg30  
TD 65536  
SOLVENT CDC13  
NS 16  
DS 2  
SWH 8196.722 Hz  
FIDRES 0.250144 Hz  
AQ 3.9976959 sec  
RG 101  
DW 61.000 usec  
DE 13.54 usec  
TE 294.3 K  
D1 1.00000000 sec  
TD0 1  
SFO1 400.1324708 MHz  
NUC1 1H  
P0 3.33 usec  
P1 10.00 usec  
PLW1 20.73200035 W

F2 - Processing parameters

SI 65536  
SF 400.1300142 MHz  
WDW EM  
SSB 0  
LB 0.30 Hz  
GB 0  
PC 1.00

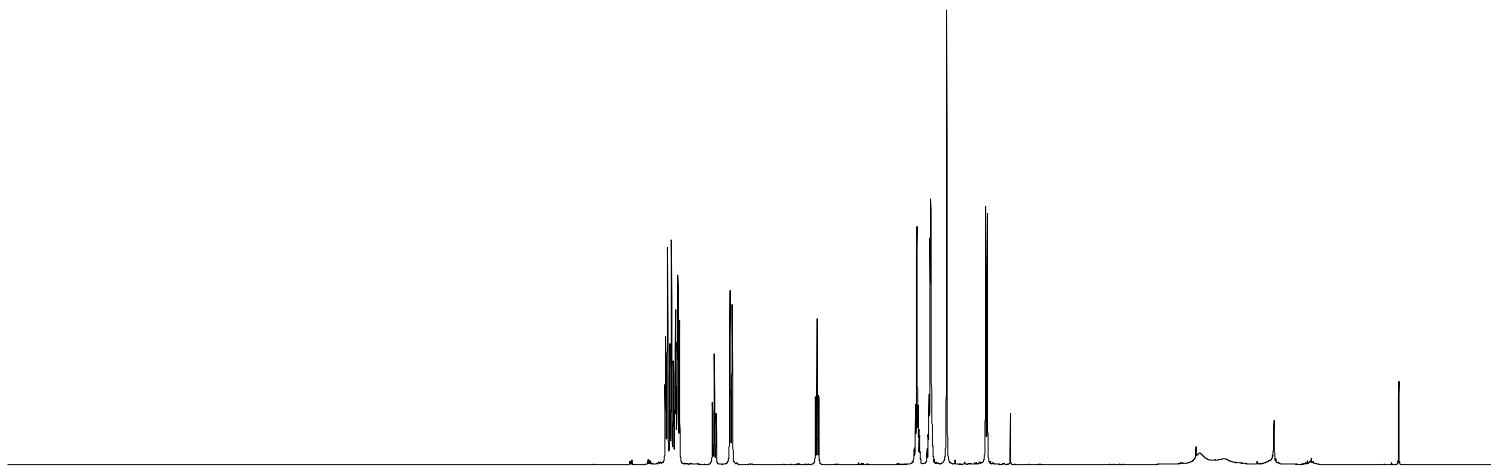

13 12 11 10 9 8 7 6 5 4 3 2 1 0 ppm

7.07  
1.01  
2.03  
1.00  
2.07  
3.07  
2.03  
2.04



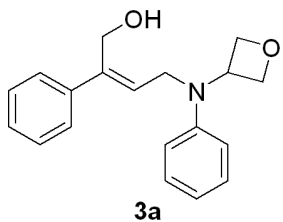

148.27  
141.57  
140.25  
129.52  
128.67  
128.30  
127.78  
126.48  
120.44  
117.03

77.47  
77.16  
76.84  
76.47

59.95  
53.74  
47.91

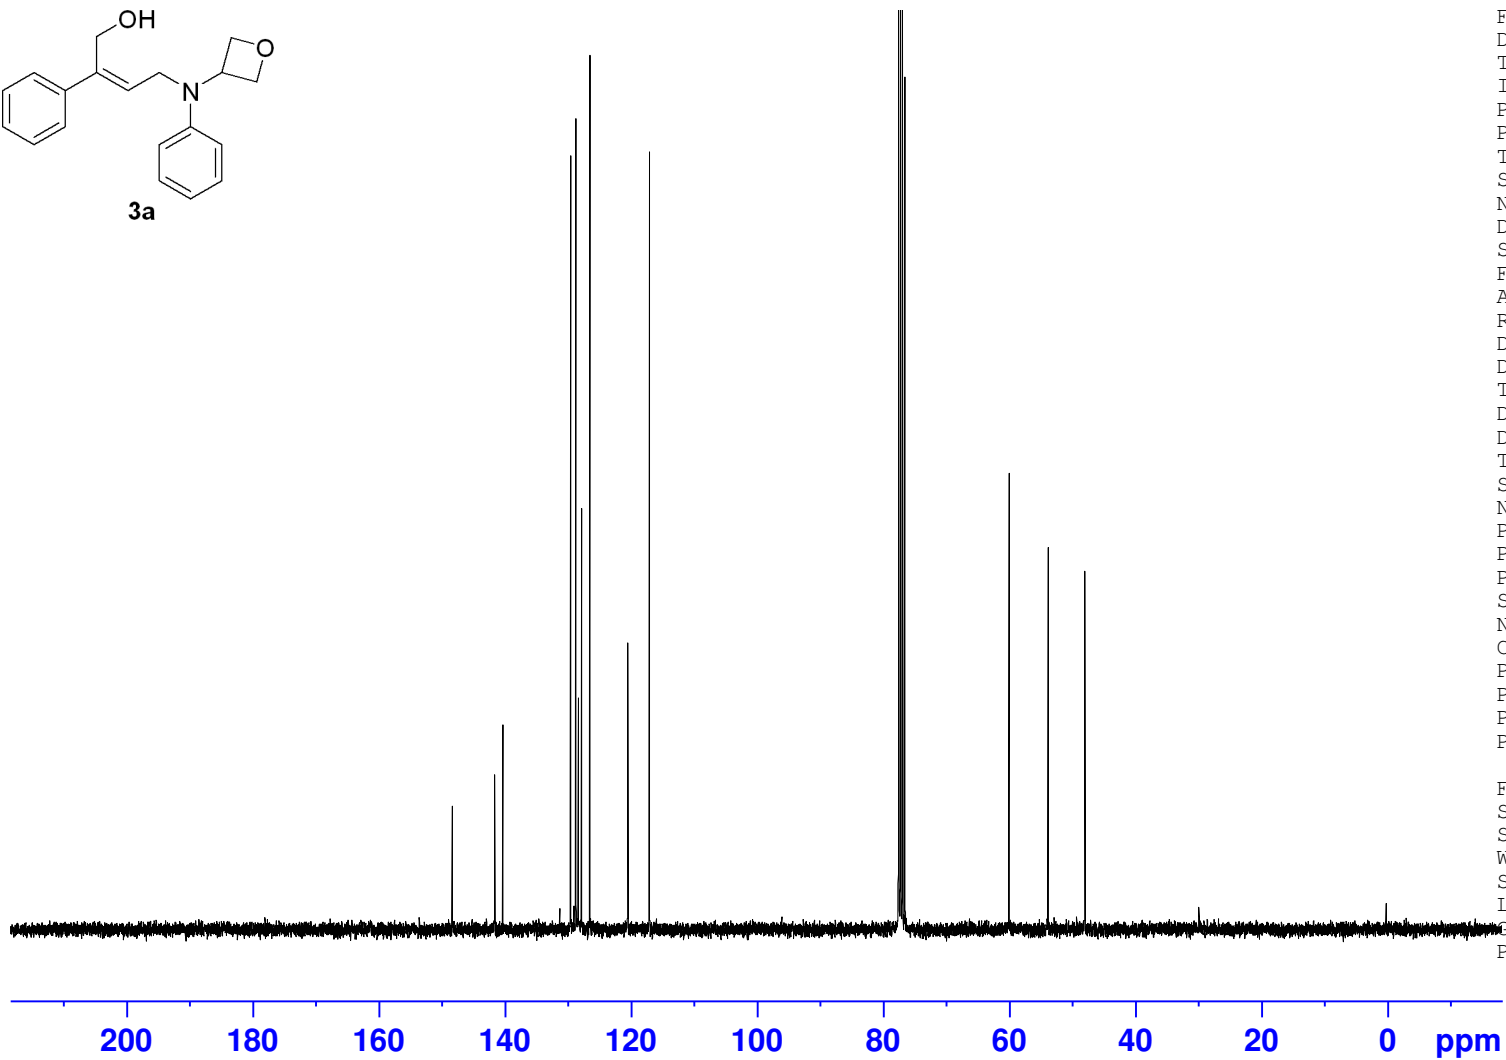

Current Data Parameters  
NAME LJX-1-39  
EXPNO 2  
PROCNO 1

F2 - Acquisition Parameters

Date\_ 20230729  
Time 4.35 h  
INSTRUM Avance  
PROBHD z116098\_0833 (  
PULPROG zgpg30  
TD 65536  
SOLVENT CDC13  
NS 500  
DS 4  
SWH 23809.523 Hz  
FIDRES 0.726609 Hz  
AQ 1.3762560 sec  
RG 46.0295  
DW 21.000 usec  
DE 6.50 usec  
TE 295.0 K  
D1 2.00000000 sec  
D11 0.03000000 sec  
TD0 1  
SFO1 100.6228298 MHz  
NUC1 13C  
P0 3.33 usec  
P1 10.00 usec  
PLW1 87.89900208 W  
SFO2 400.1316005 MHz  
NUC2 1H  
CPDPRG[2] waltz65  
PCPD2 90.00 usec  
PLW2 20.73200035 W  
PLW12 0.25595000 W  
PLW13 0.12874000 W

F2 - Processing parameters

SI 32768  
SF 100.6127603 MHz  
WDW EM  
SSB 0  
LB 1.00 Hz  
GB 0  
PC 1.40

ljx-2-44

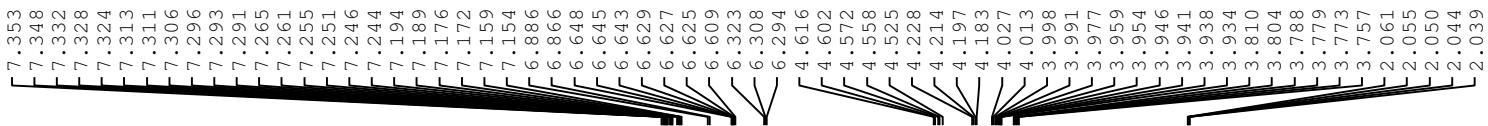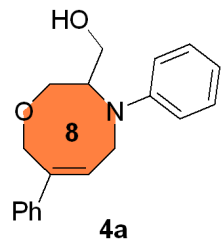

Current Data Parameters  
NAME 20230610-400  
EXPNO 13  
PROCNO 1

F2 - Acquisition Parameters  
Date\_ 20230609  
Time 23.11  
INSTRUM spect  
PROBHD 5 mm PADUL 13C  
PULPROG zg30  
TD 65536  
SOLVENT Acetone  
NS 6  
DS 0  
SWH 8223.685 Hz  
FIDRES 0.125483 Hz  
AQ 3.9845889 sec  
RG 53.3  
DW 60.800 usec  
DE 6.50 usec  
TE 291.4 K  
D1 1.00000000 sec  
TD0 1

==== CHANNEL f1 =====  
NUC1 1H  
P1 9.90 usec  
PLW1 23.00000000 W  
SFO1 400.1924713 MHz

F2 - Processing parameters  
SI 65536  
SF 400.1900111 MHz  
WDW EM  
SSB 0  
LB 0.30 Hz  
GB 0  
PC 1.00

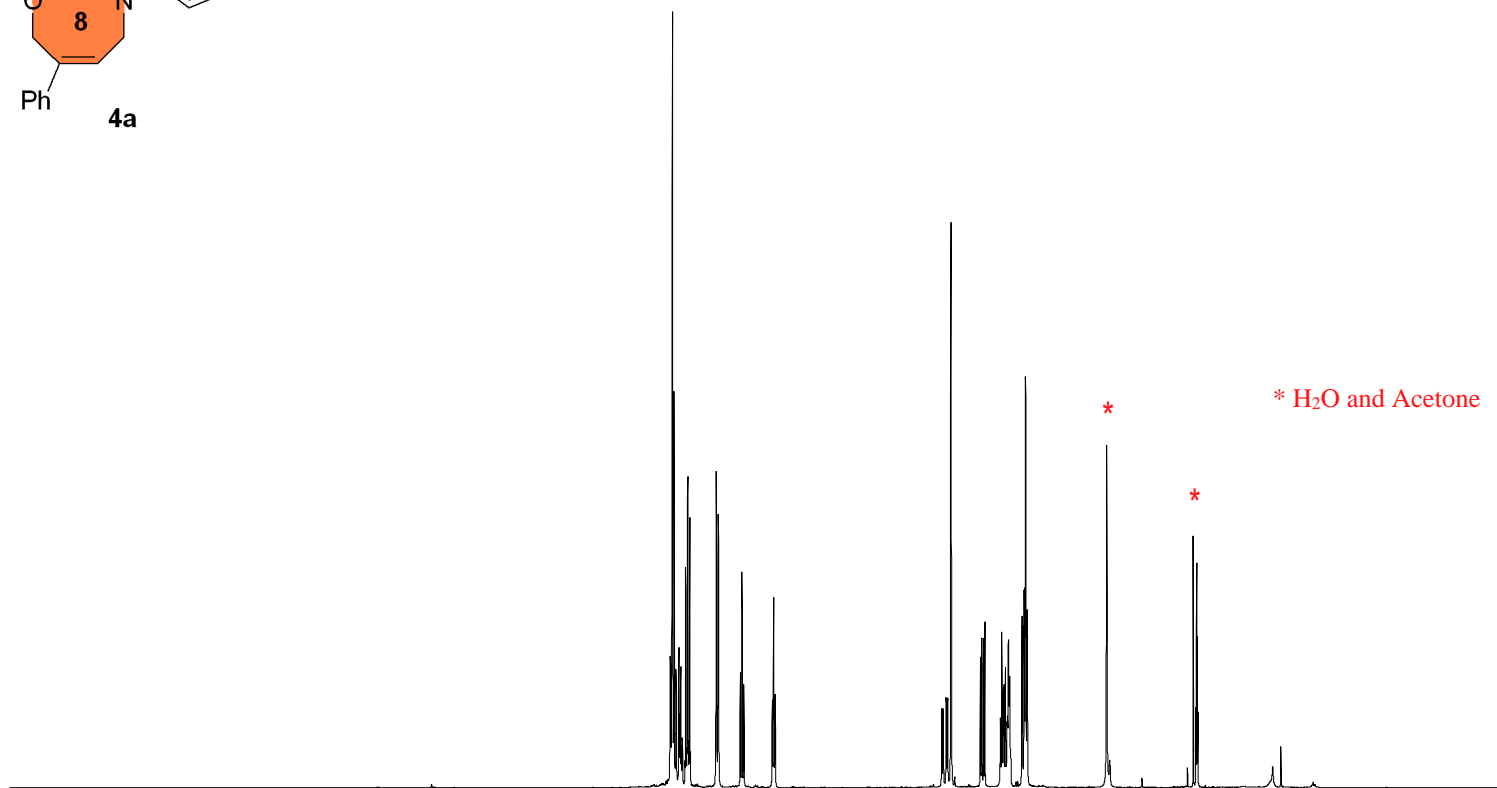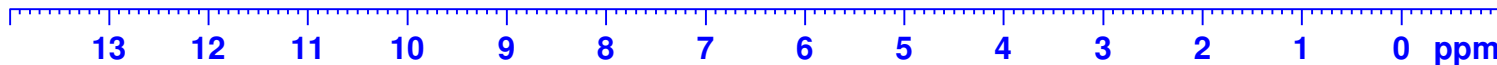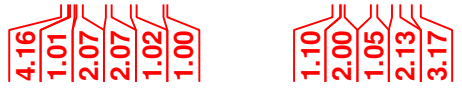

ljx-2-44

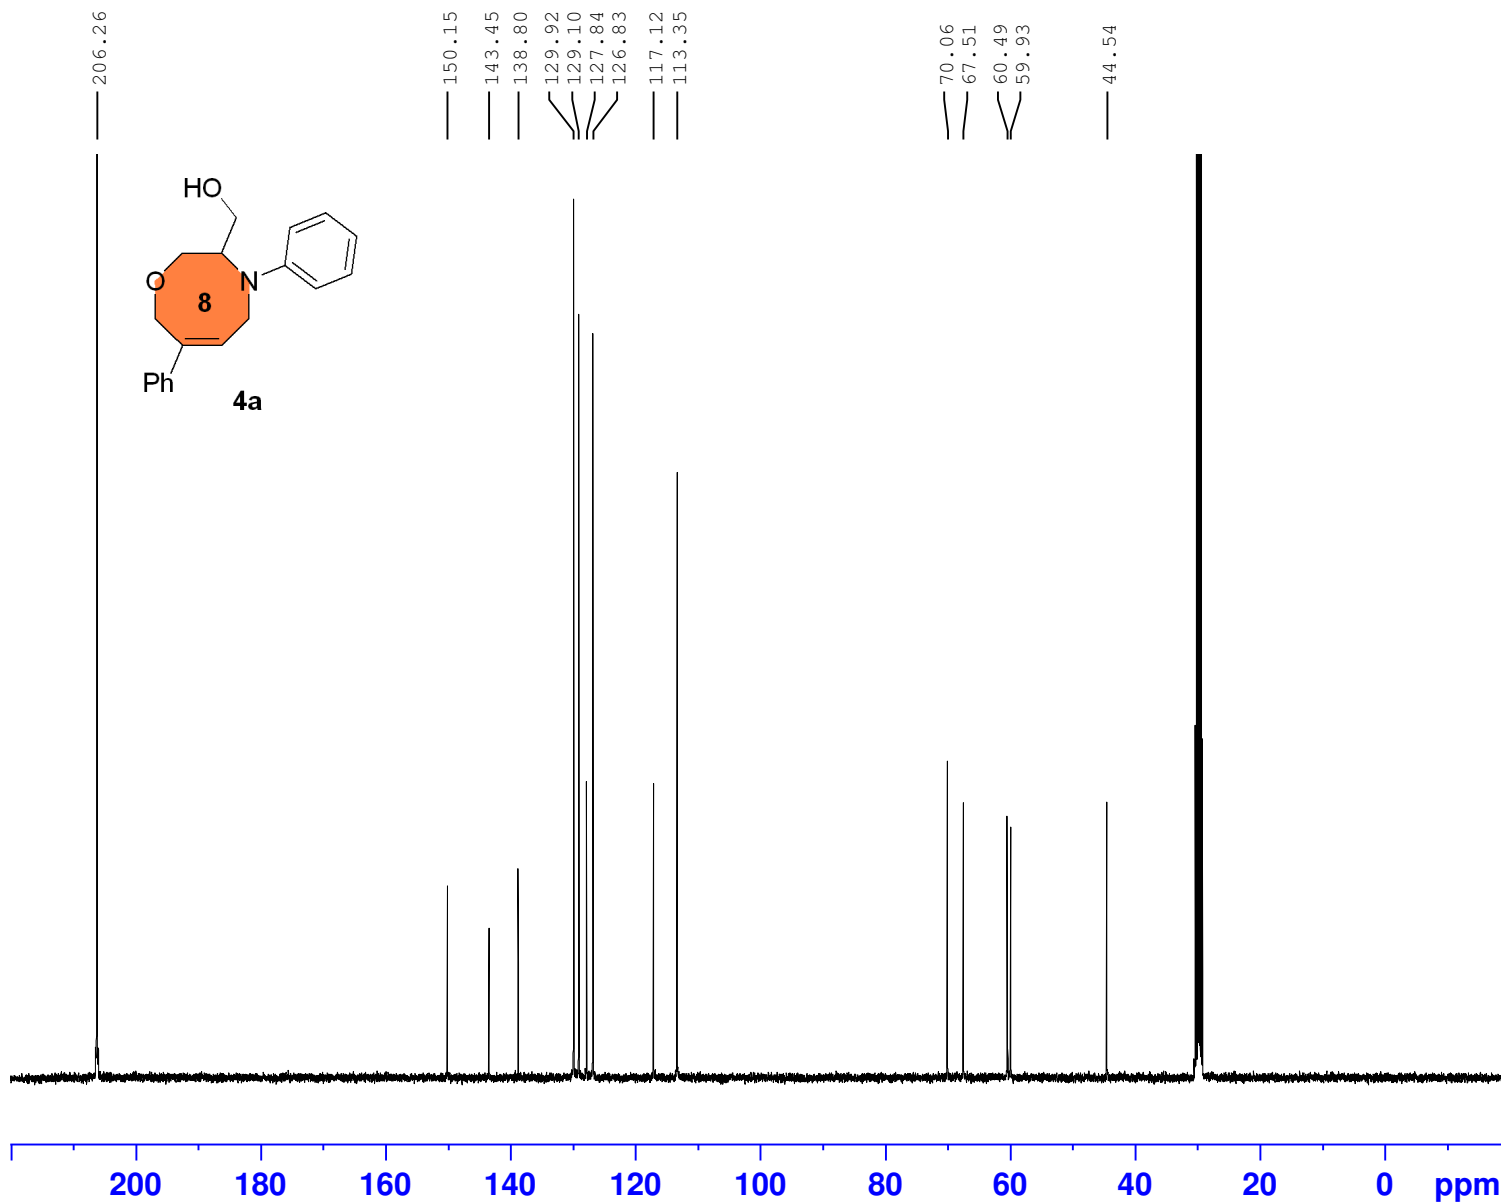

Current Data Parameters  
NAME 20230615-400m  
EXPNO 39  
PROCNO 1

F2 - Acquisition Parameters  
Date\_ 20230615  
Time 3.10  
INSTRUM spect  
PROBHD 5 mm PADUL 13C  
PULPROG zgpg30  
TD 65536  
SOLVENT Acetone  
NS 400  
DS 4  
SWH 24038.461 Hz  
FIDRES 0.366798 Hz  
AQ 1.3631488 sec  
RG 50.16  
DW 20.800 usec  
DE 6.50 usec  
TE 292.9 K  
D1 2.00000000 sec  
D11 0.03000000 sec  
TD0 1

===== CHANNEL f1 =====  
NUC1 13C  
P1 9.80 usec  
PLW1 47.40000153 W  
SFO1 100.6379178 MHz

===== CHANNEL f2 =====  
CPDPRG[2] waltz16  
NUC2 1H  
PCPD2 90.00 usec  
PLW2 23.00000000 W  
PLW12 0.30712000 W  
PLW13 0.24877000 W  
SFO2 400.1916008 MHz

F2 - Processing parameters  
SI 32768  
SF 100.6277790 MHz  
WDW EM  
SSB 0  
LB 1.00 Hz  
GB 0  
PC 1.40

ljx-3-12

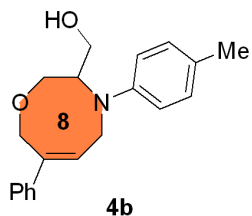

7.350  
7.345  
7.328  
7.325  
7.308  
7.303  
7.293  
7.288  
7.261  
7.256  
7.239  
7.000  
6.979  
6.786  
6.764  
6.294  
6.281  
6.268  
4.572  
4.558  
4.528  
4.513  
4.507  
4.195  
4.180  
4.164  
4.149  
3.977  
3.963  
3.932  
3.918  
3.893  
3.890  
3.808  
3.801  
3.777  
3.770  
3.760  
3.746  
3.730  
2.181  
2.060  
2.055  
2.049  
2.044  
2.038

Current Data Parameters  
NAME 3-12  
EXPNO 33  
PROCNO 1

F2 - Acquisition Parameters  
Date\_ 20230316  
Time 5.12  
INSTRUM spect  
PROBHD 5 mm PABBO BB-  
PULPROG zg30  
TD 65536  
SOLVENT Acetone  
NS 6  
DS 2  
SWH 8223.685 Hz  
FIDRES 0.125483 Hz  
AQ 3.9845889 sec  
RG 90.23  
DW 60.800 usec  
DE 6.50 usec  
TE 293.1 K  
D1 1.00000000 sec  
TD0 1

==== CHANNEL f1 =====  
NUC1 1H  
P1 14.68 usec  
PLW1 14.00000000 W  
SFO1 400.1924713 MHz

F2 - Processing parameters  
SI 65536  
SF 400.1900125 MHz  
WDW EM  
SSB 0  
LB 0.30 Hz  
GB 0  
PC 1.00

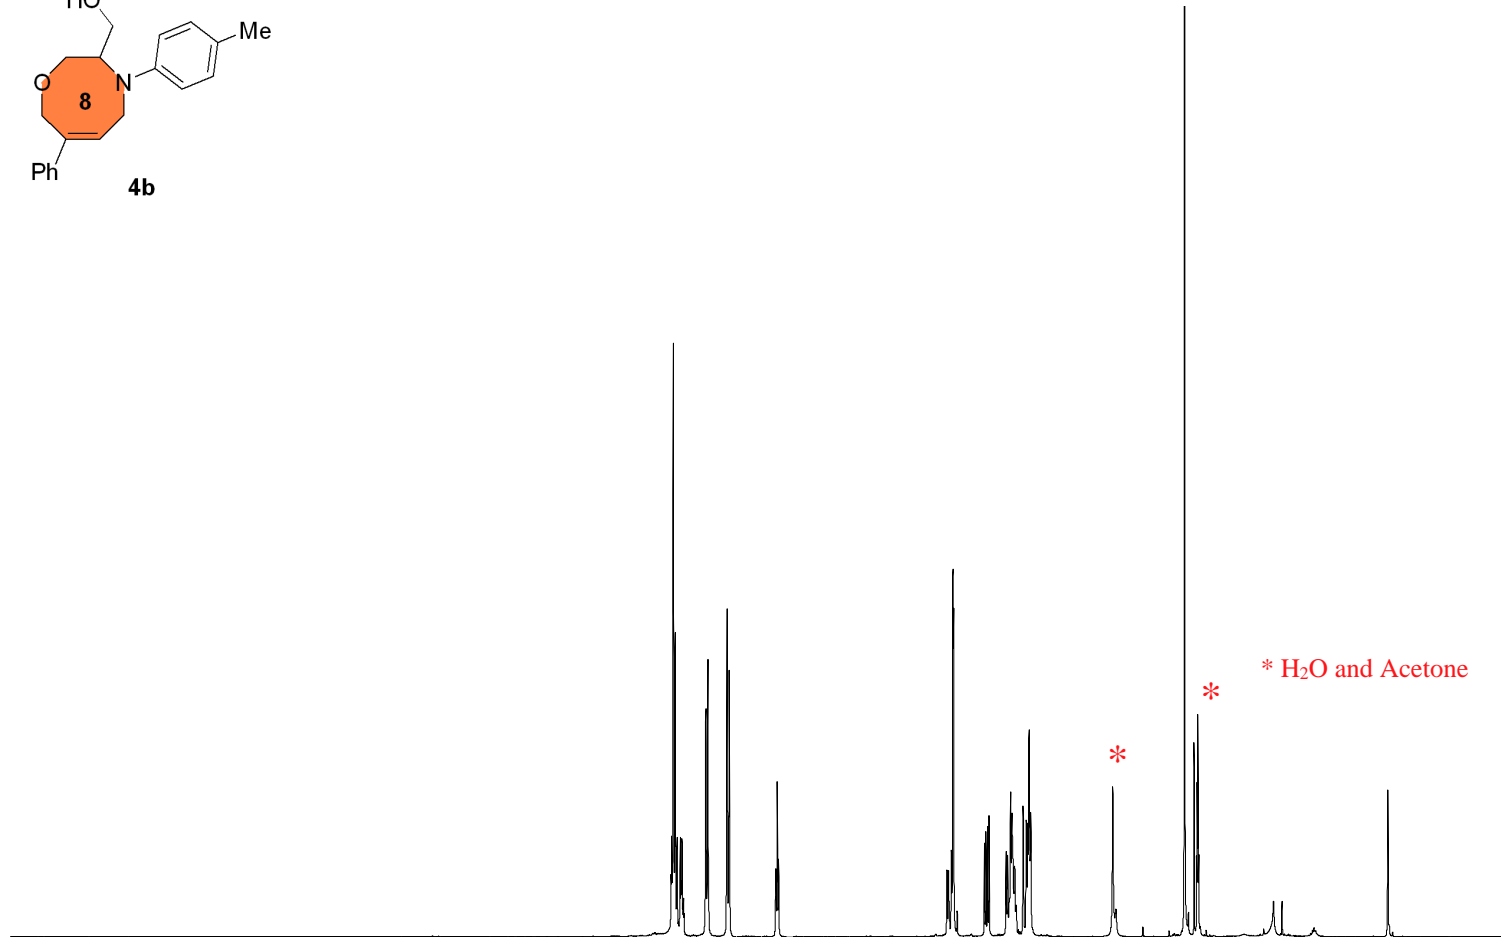

13 12 11 10 9 8 7 6 5 4 3 2 1 0 ppm

5.08  
2.02  
2.02  
1.00  
3.10  
1.04  
2.10  
3.05  
3.01

ljx-3-12

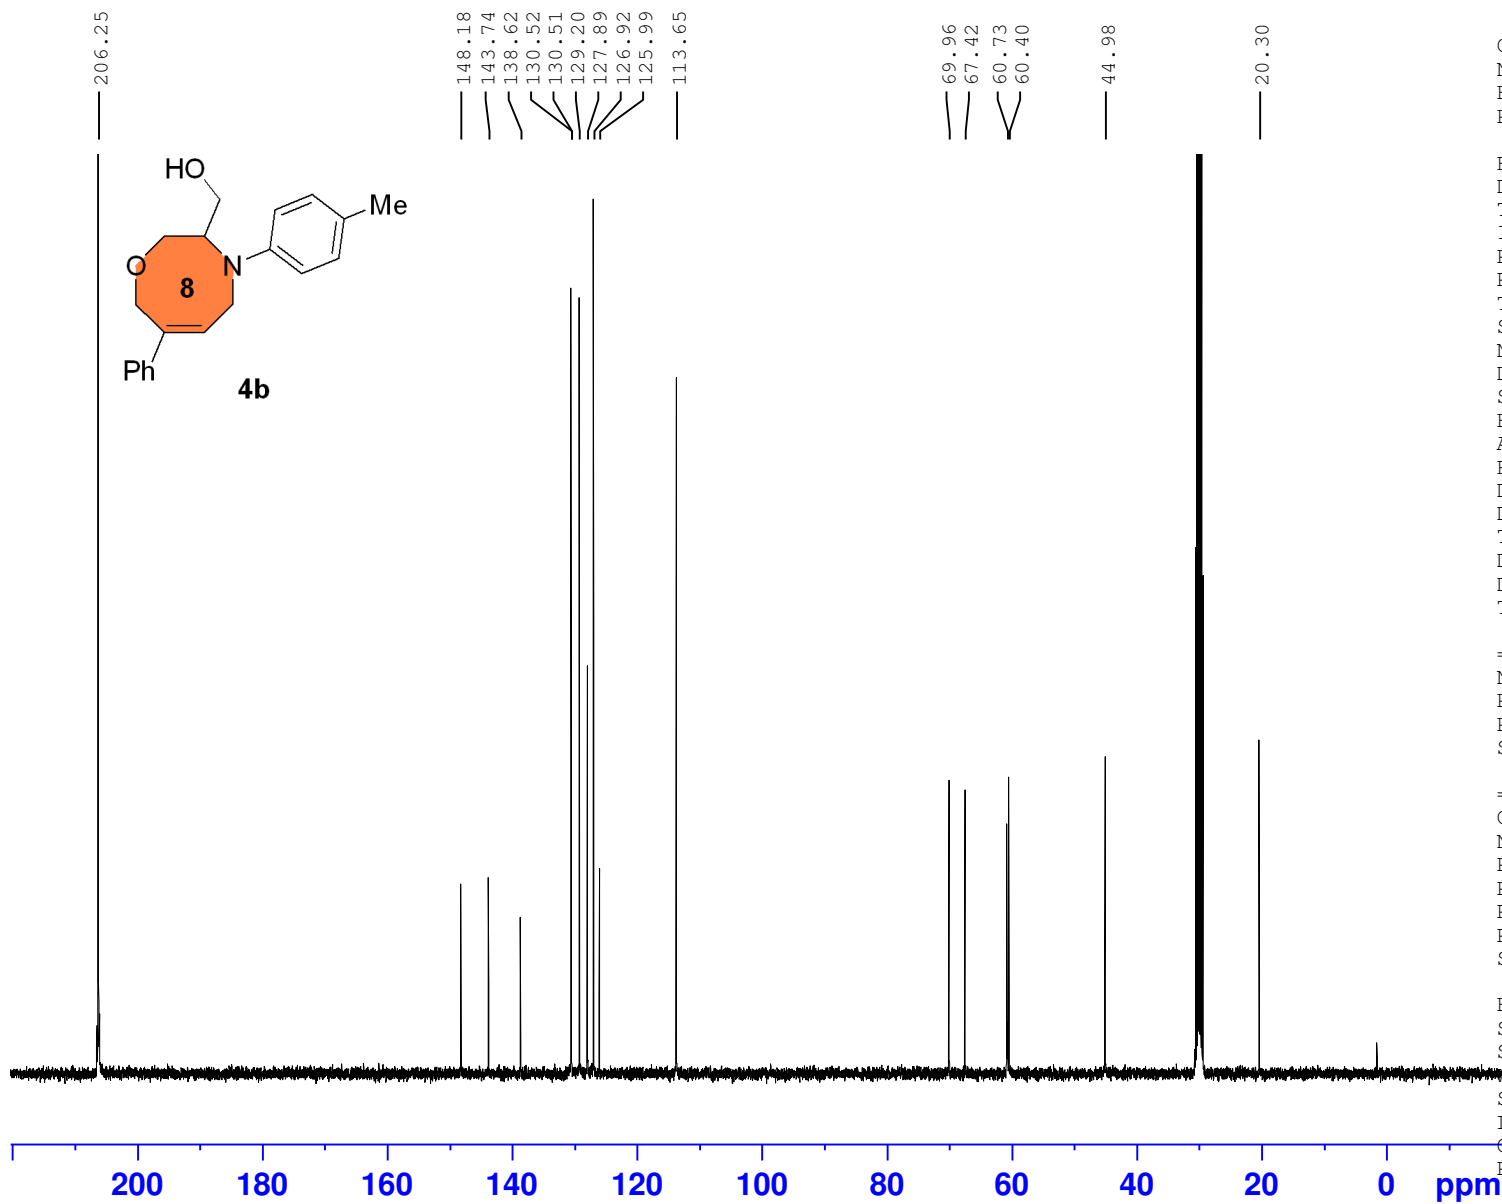

Current Data Parameters  
NAME 3-12  
EXPNO 34  
PROCNO 1

F2 - Acquisition Parameters  
Date\_ 20230316  
Time 5.48  
INSTRUM spect  
PROBHD 5 mm PABBO BB-  
PULPROG zgpg30  
TD 65536  
SOLVENT Acetone  
NS 600  
DS 4  
SWH 24038.461 Hz  
FIDRES 0.366798 Hz  
AQ 1.3631488 sec  
RG 193.13  
DW 20.800 usec  
DE 6.50 usec  
TE 293.3 K  
D1 2.00000000 sec  
D11 0.03000000 sec  
TD0 1

===== CHANNEL f1 =====  
NUC1 13C  
P1 12.00 usec  
PLW1 53.00000000 W  
SFO1 100.6379178 MHz

===== CHANNEL f2 =====  
CPDPRG[2] waltz16  
NUC2 1H  
PCPD2 90.00 usec  
PLW2 14.00000000 W  
PLW12 0.37246999 W  
PLW13 0.30170000 W  
SFO2 400.1916008 MHz

F2 - Processing parameters  
SI 32768  
SF 100.6277672 MHz  
WDW EM  
SSB 0  
LB 1.00 Hz  
GB 0  
PC 1.40

ljx-3-8

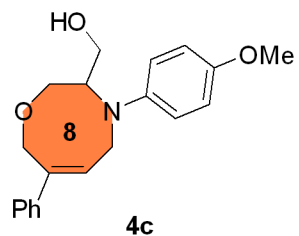

7.349  
7.332  
7.328  
7.311  
7.291  
7.258  
7.242  
6.848  
6.841  
6.832  
6.825  
6.816  
6.809  
6.802  
6.793  
6.786  
6.276  
6.262  
6.248  
4.604  
4.587  
4.561  
4.549  
4.522  
4.509  
4.473  
4.338  
4.322  
4.307  
4.168  
4.153  
4.138  
4.123  
3.953  
3.940  
3.909  
3.895  
3.846  
3.827  
3.815  
3.786  
3.780  
3.735  
3.719  
3.694  
2.060  
2.055  
2.049  
2.044  
2.039

Current Data Parameters  
NAME 20230316-400M  
EXPNO 31  
PROCNO 1

F2 - Acquisition Parameters  
Date\_ 20230316  
Time 4.33  
INSTRUM spect  
PROBHD 5 mm PABBO BB-  
PULPROG zg30  
TD 65536  
SOLVENT Acetone  
NS 6  
DS 2  
SWH 8223.685 Hz  
FIDRES 0.125483 Hz  
AQ 3.9845889 sec  
RG 140.02  
DW 60.800 usec  
DE 6.50 usec  
TE 293.2 K  
D1 1.00000000 sec  
TD0 1

==== CHANNEL f1 =====  
NUC1 1H  
P1 14.68 usec  
PLW1 14.00000000 W  
SFO1 400.1924713 MHz

F2 - Processing parameters  
SI 65536  
SF 400.1900125 MHz  
WDW EM  
SSB 0  
LB 0.30 Hz  
GB 0  
PC 1.00

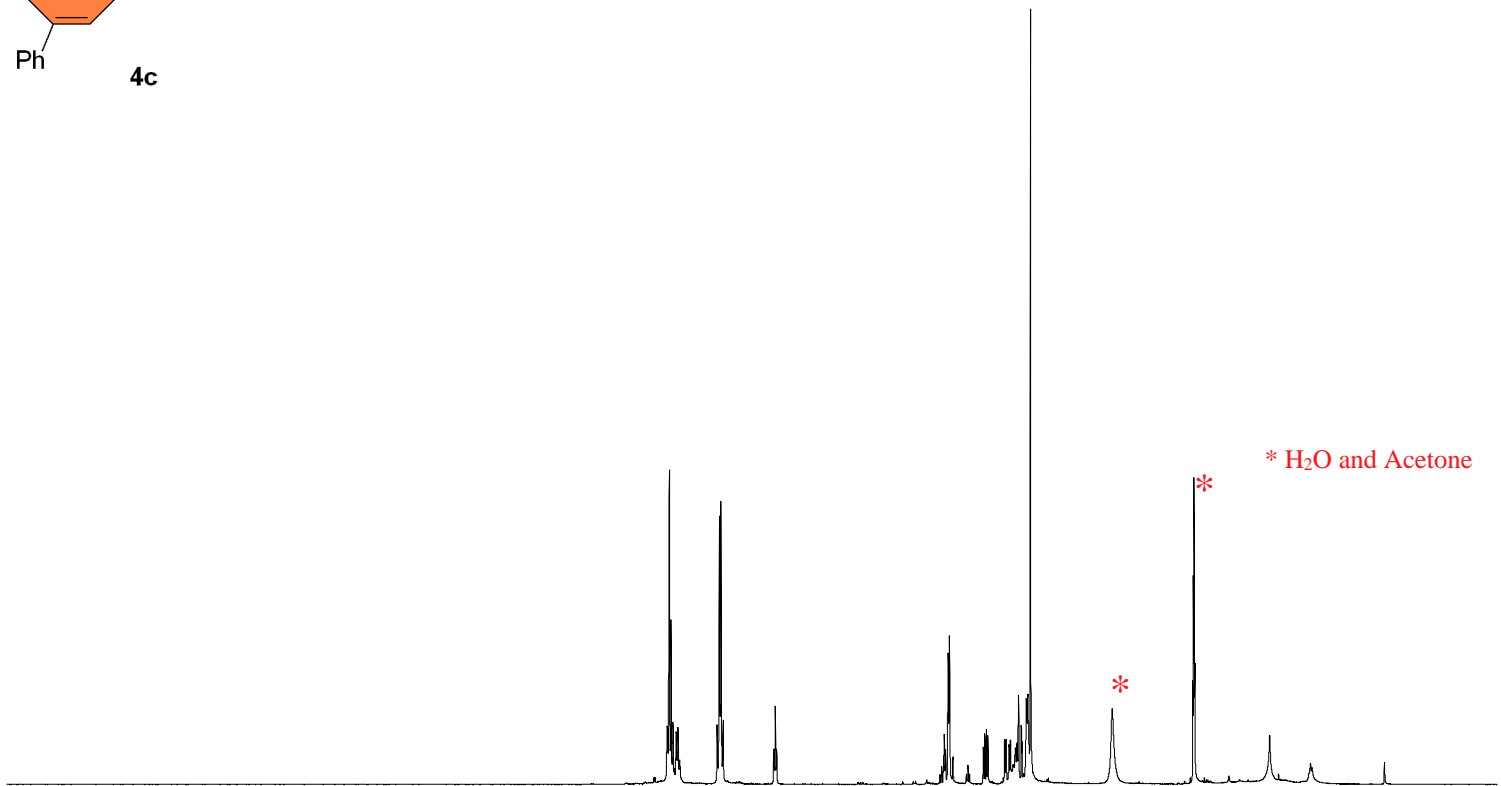

13 12 11 10 9 8 7 6 5 4 3 2 1 0 ppm

6.04  
4.07  
1.00  
3.05  
1.03  
2.03  
3.00  
3.02

ljx-3-8

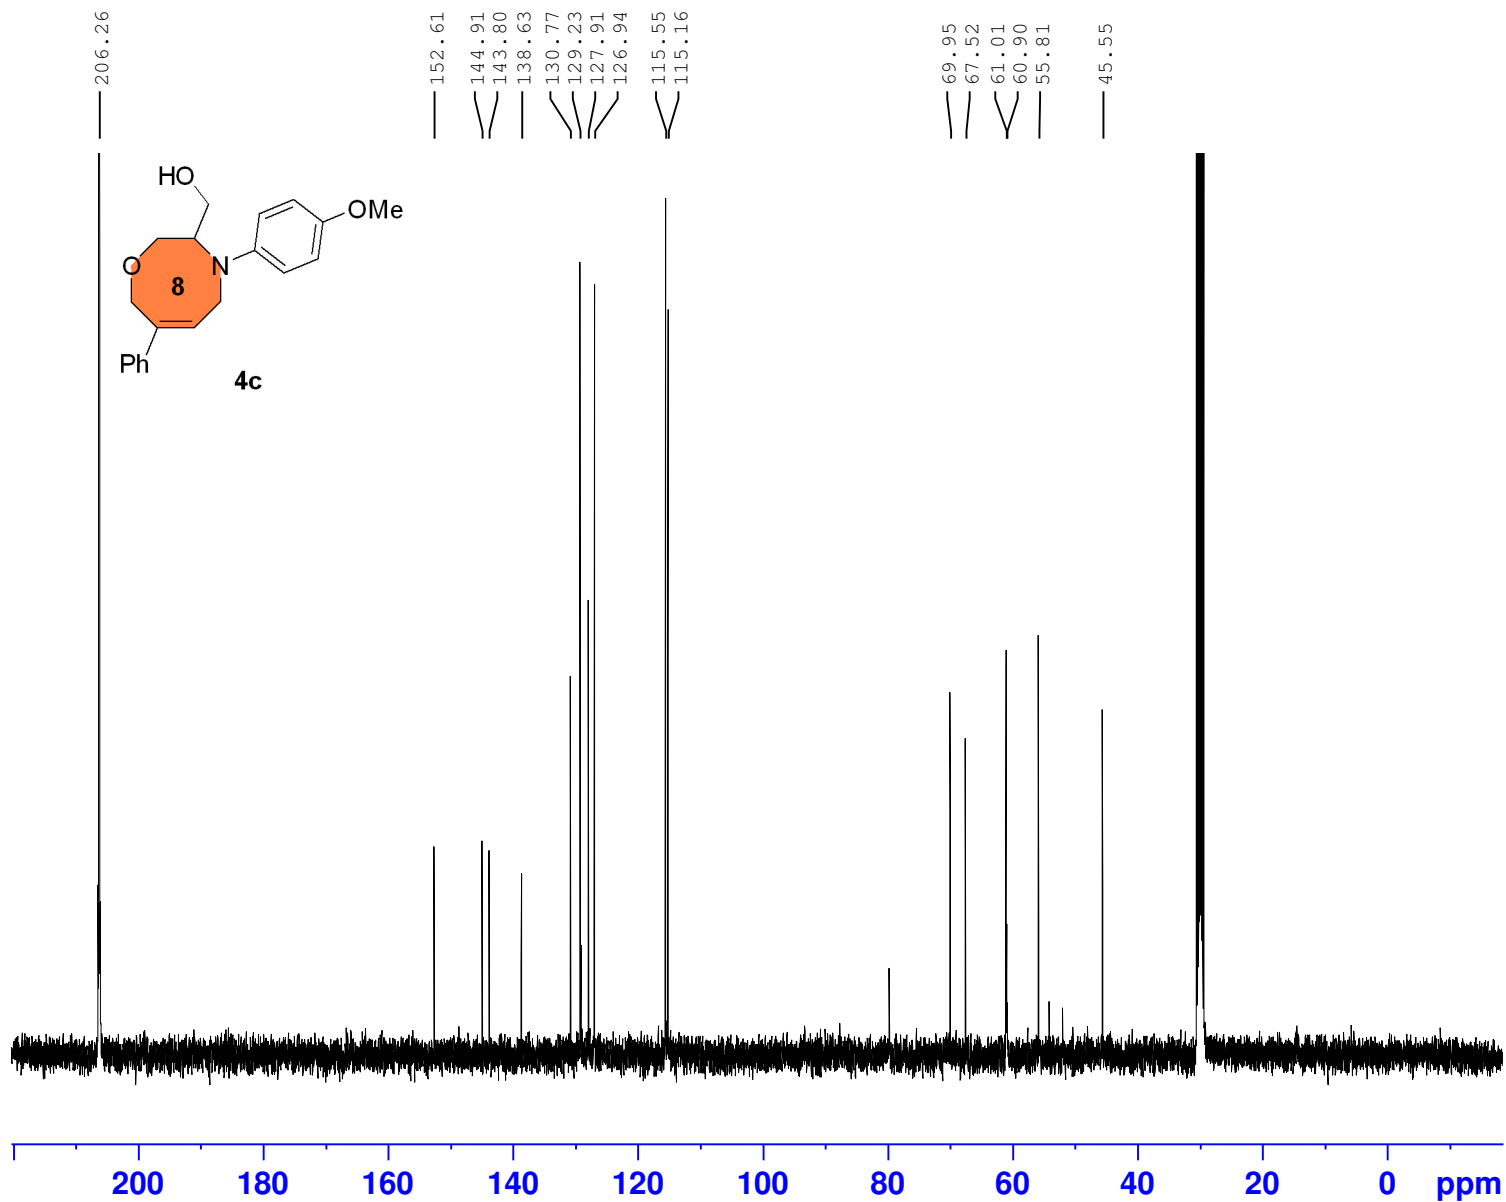

Current Data Parameters  
NAME 20230316-400M  
EXPNO 32  
PROCNO 1

F2 - Acquisition Parameters  
Date\_ 20230316  
Time 5.08  
INSTRUM spect  
PROBHD 5 mm PABBO BB-  
PULPROG zgpg30  
TD 65536  
SOLVENT Acetone  
NS 600  
DS 4  
SWH 24038.461 Hz  
FIDRES 0.366798 Hz  
AQ 1.3631488 sec  
RG 193.13  
DW 20.800 usec  
DE 6.50 usec  
TE 293.3 K  
D1 2.00000000 sec  
D11 0.03000000 sec  
TD0 1

==== CHANNEL f1 =====  
NUC1 13C  
P1 12.00 usec  
PLW1 53.00000000 W  
SFO1 100.6379178 MHz

==== CHANNEL f2 =====  
CPDPRG[2] waltz16  
NUC2 1H  
PCPD2 90.00 usec  
PLW2 14.00000000 W  
PLW12 0.37246999 W  
PLW13 0.30170000 W  
SFO2 400.1916008 MHz

F2 - Processing parameters  
SI 32768  
SF 100.6277636 MHz  
WDW EM  
SSB 0  
LB 1.00 Hz  
GB 0  
PC 1.40

ljx-3-11

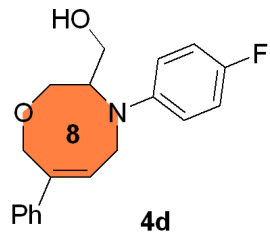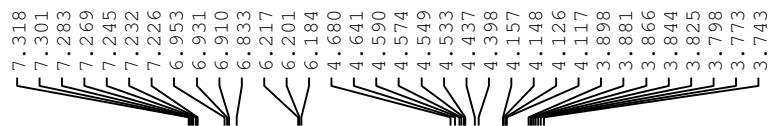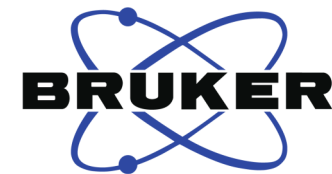

Current Data Parameters  
NAME 20231021-400M  
EXPNO 12  
PROCNO 1

F2 - Acquisition Parameters  
Date\_ 20231020  
Time 22.41  
INSTRUM spect  
PROBHD 5 mm PADUL 13C  
PULPROG zg30  
TD 65536  
SOLVENT CDC13  
NS 6  
DS 2  
SWH 8223.685 Hz  
FIDRES 0.125483 Hz  
AQ 3.9845889 sec  
RG 29.75  
DW 60.800 usec  
DE 6.50 usec  
TE 293.9 K  
D1 1.00000000 sec  
TD0 1

==== CHANNEL f1 =====  
NUC1 1H  
P1 9.90 usec  
PLW1 23.00000000 W  
SFO1 400.1924713 MHz

F2 - Processing parameters  
SI 65536  
SF 400.1900248 MHz  
WDW EM  
SSB 0  
LB 0.30 Hz  
GB 0  
PC 1.00

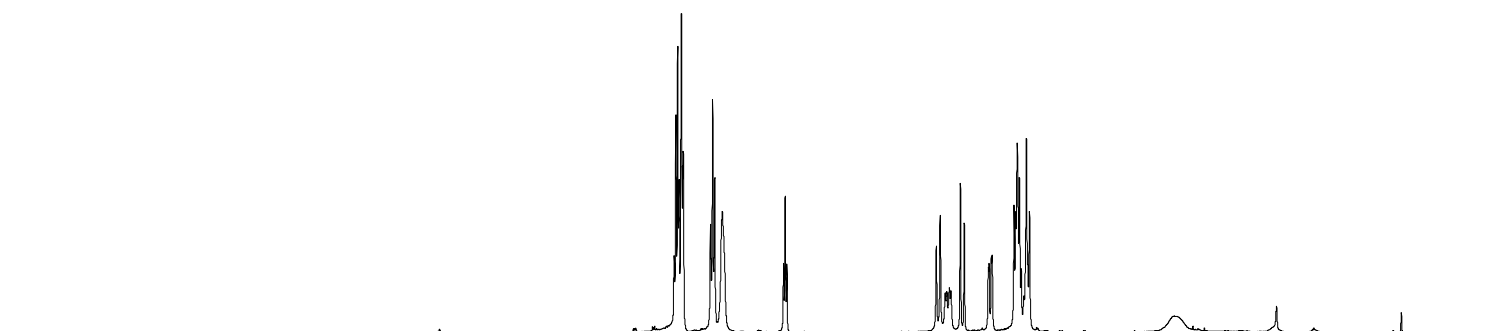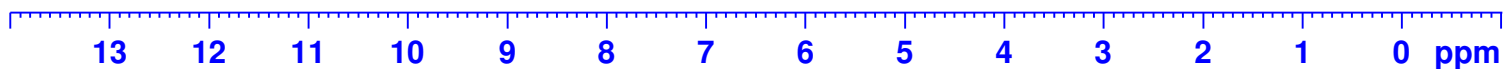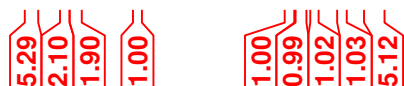



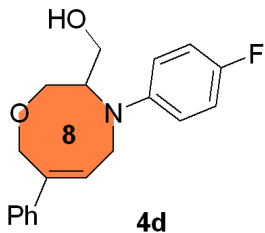

157.04  
154.69  
146.10  
146.09  
141.72  
139.78  
128.54  
127.65  
127.52  
126.31  
115.99  
115.77  
114.89  
114.82

77.47  
77.16  
76.84  
71.06  
68.13  
60.64  
59.22  
43.28

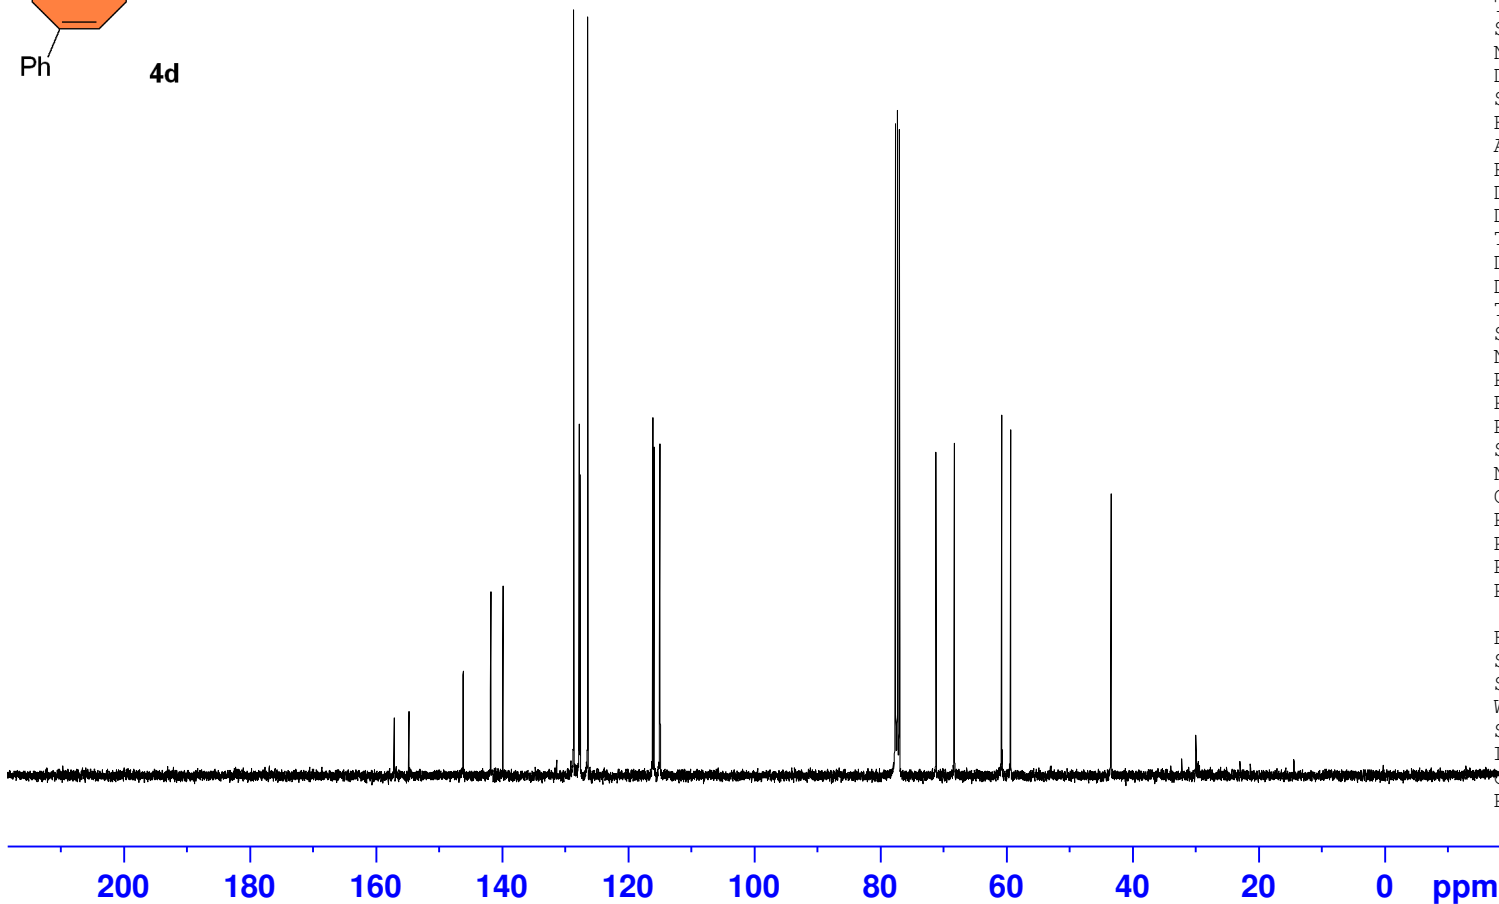

Current Data Parameters  
NAME LJX-3-11  
EXPNO 2  
PROCNO 1

F2 - Acquisition Parameters

Date\_ 20230729  
Time 5.11 h  
INSTRUM Avance  
PROBHD z116098\_0833 (  
PULPROG zgpg30  
TD 65536  
SOLVENT CDC13  
NS 500  
DS 4  
SWH 23809.523 Hz  
FIDRES 0.726609 Hz  
AQ 1.3762560 sec  
RG 46.0295  
DW 21.000 usec  
DE 6.50 usec  
TE 295.0 K  
D1 2.00000000 sec  
D11 0.03000000 sec  
TD0 1  
SFO1 100.6228298 MHz  
NUC1 13C  
P0 3.33 usec  
P1 10.00 usec  
PLW1 87.89900208 W  
SFO2 400.1316005 MHz  
NUC2 1H  
CPDPRG[2] waltz65  
PCPD2 90.00 usec  
PLW2 20.73200035 W  
PLW12 0.25595000 W  
PLW13 0.12874000 W

F2 - Processing parameters

SI 32768  
SF 100.6127606 MHz  
WDW EM  
SSB 0  
LB 1.00 Hz  
GB 0  
PC 1.40

# <sup>19</sup>F NMR

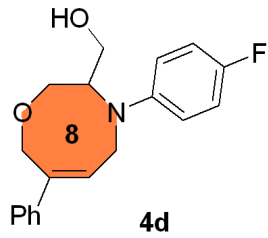

-127.60

Current Data Parameters  
NAME LJX-3-11  
EXPNO 3  
PROCNO 1

F2 - Acquisition Parameters  
Date\_ 20230729  
Time 5.12 h  
INSTRUM Avance  
PROBHD z116098\_0833 (  
PULPROG zgig  
TD 131072  
SOLVENT CDCl3  
NS 16  
DS 4  
SWH 90909.094 Hz  
FIDRES 1.387163 Hz  
AQ 0.7208960 sec  
RG 101  
DW 5.500 usec  
DE 6.50 usec  
TE 294.6 K  
D1 1.00000000 sec  
D11 0.03000000 sec  
TD0 1  
SFO1 376.4607164 MHz  
NUC1 19F  
P1 18.00 usec  
PLW1 16.73100090 W  
SFO2 400.1316005 MHz  
NUC2 1H  
CPDPRG[2] waltz16  
PCPD2 90.00 usec  
PLW2 20.73200035 W  
PLW12 0.25595000 W

F2 - Processing parameters  
SI 65536  
SF 376.4983662 MHz  
WDW EM  
SSB 0  
LB 0.30 Hz  
GB 0  
PC 1.00

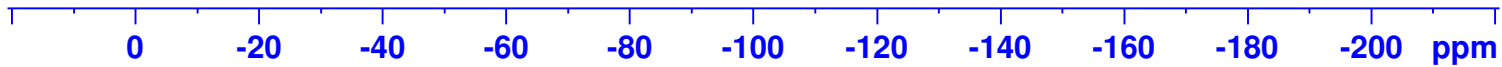

ljx-3-10

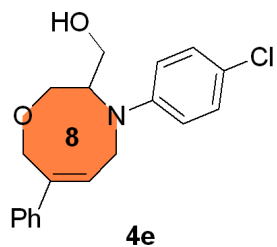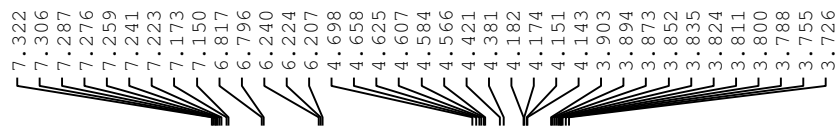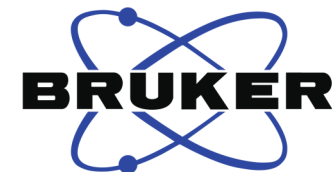

Current Data Parameters  
NAME 20231021-400M  
EXPNO 7  
PROCNO 1

F2 - Acquisition Parameters  
Date\_ 20231020  
Time 22.18  
INSTRUM spect  
PROBHD 5 mm PADUL 13C  
PULPROG zg30  
TD 65536  
SOLVENT CDC13  
NS 6  
DS 2  
SWH 8223.685 Hz  
FIDRES 0.125483 Hz  
AQ 3.9845889 sec  
RG 61.19  
DW 60.800 usec  
DE 6.50 usec  
TE 293.9 K  
D1 1.00000000 sec  
TD0 1

==== CHANNEL f1 =====  
NUC1 1H  
P1 9.90 usec  
PLW1 23.00000000 W  
SFO1 400.1924713 MHz

F2 - Processing parameters  
SI 65536  
SF 400.1900215 MHz  
WDW EM  
SSB 0  
LB 0.30 Hz  
GB 0  
PC 1.00

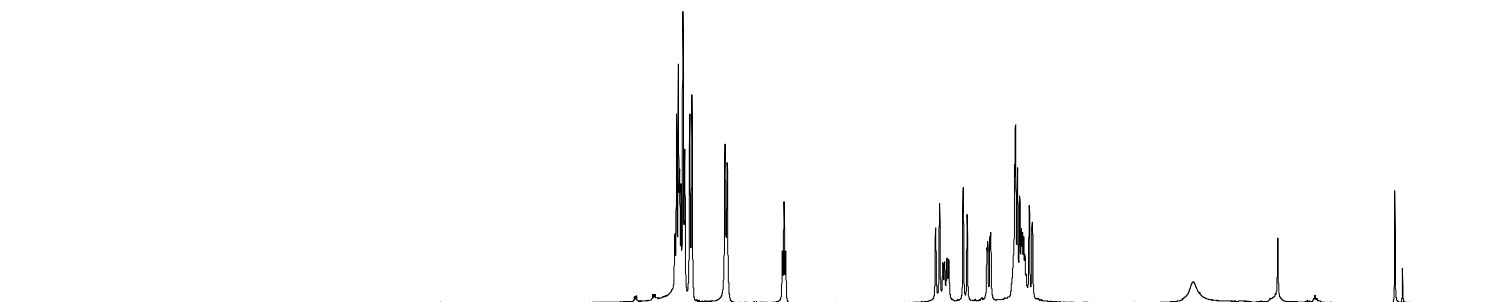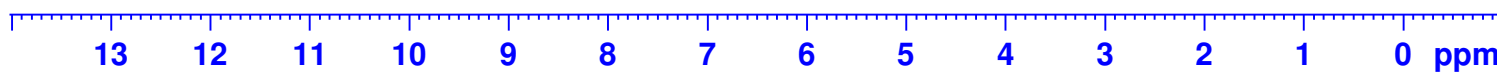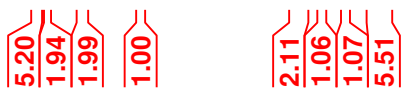

ljx-3-10

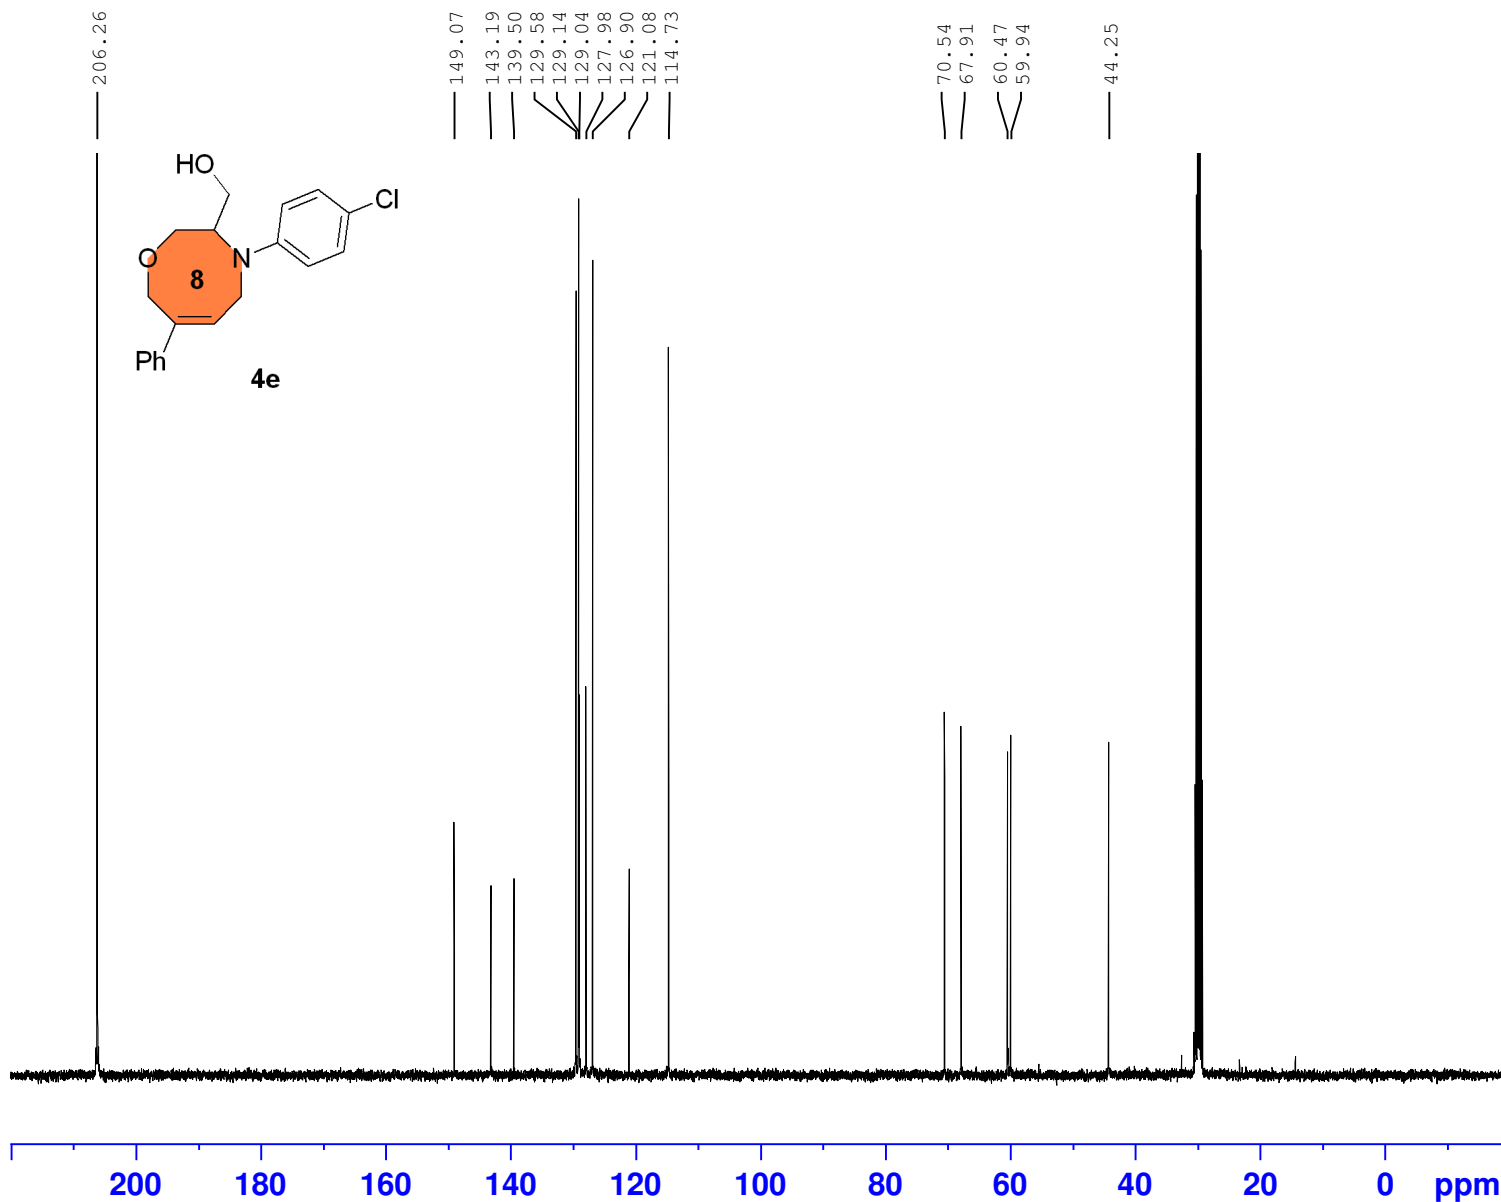

Current Data Parameters  
NAME 3-10  
EXPNO 17  
PROCNO 1

F2 - Acquisition Parameters  
Date\_ 20230310  
Time 0.36  
INSTRUM spect  
PROBHD 5 mm PABBO BB-  
PULPROG zgpg30  
TD 65536  
SOLVENT Acetone  
NS 300  
DS 4  
SWH 24038.461 Hz  
FIDRES 0.366798 Hz  
AQ 1.3631488 sec  
RG 193.13  
DW 20.800 usec  
DE 6.50 usec  
TE 295.0 K  
D1 2.00000000 sec  
D11 0.03000000 sec  
TD0 1

==== CHANNEL f1 =====  
NUC1 13C  
P1 12.00 usec  
PLW1 53.00000000 W  
SFO1 100.6379178 MHz

==== CHANNEL f2 =====  
CPDPRG[2] waltz16  
NUC2 1H  
PCPD2 90.00 usec  
PLW2 14.00000000 W  
PLW12 0.37246999 W  
PLW13 0.30170000 W  
SFO2 400.1916008 MHz

F2 - Processing parameters  
SI 32768  
SF 100.6277765 MHz  
WDW EM  
SSB 0  
LB 1.00 Hz  
GB 0  
PC 1.40

ljx-3-17

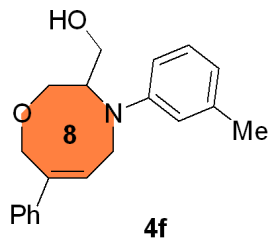

7.354  
7.349  
7.344  
7.333  
7.329  
7.311  
7.307  
7.296  
7.264  
7.260  
7.254  
7.250  
7.243  
7.236  
7.226  
7.209  
7.069  
7.049  
7.030  
6.708  
6.681  
6.675  
6.660  
6.654  
6.472  
6.453  
6.316  
6.302  
6.288  
4.590  
4.576  
4.546  
4.521  
4.219  
4.204  
4.188  
4.173  
3.994  
3.981  
3.967  
3.948  
3.934  
3.809  
3.803  
3.778  
3.771  
3.756  
3.739  
3.247  
2.060  
2.055  
2.049  
2.044  
2.038

Current Data Parameters  
NAME 3-17  
EXPNO 24  
PROCNO 1

F2 - Acquisition Parameters  
Date\_ 20230322  
Time 2.43  
INSTRUM spect  
PROBHD 5 mm PABBO BB-  
PULPROG zg30  
TD 65536  
SOLVENT Acetone  
NS 8  
DS 2  
SWH 8223.685 Hz  
FIDRES 0.125483 Hz  
AQ 3.9845889 sec  
RG 90.23  
DW 60.800 usec  
DE 6.50 usec  
TE 291.6 K  
D1 1.00000000 sec  
TD0 1

==== CHANNEL f1 =====  
NUC1 1H  
P1 14.68 usec  
PLW1 14.00000000 W  
SFO1 400.1924713 MHz

F2 - Processing parameters  
SI 65536  
SF 400.1900127 MHz  
WDW EM  
SSB 0  
LB 0.30 Hz  
GB 0  
PC 1.00

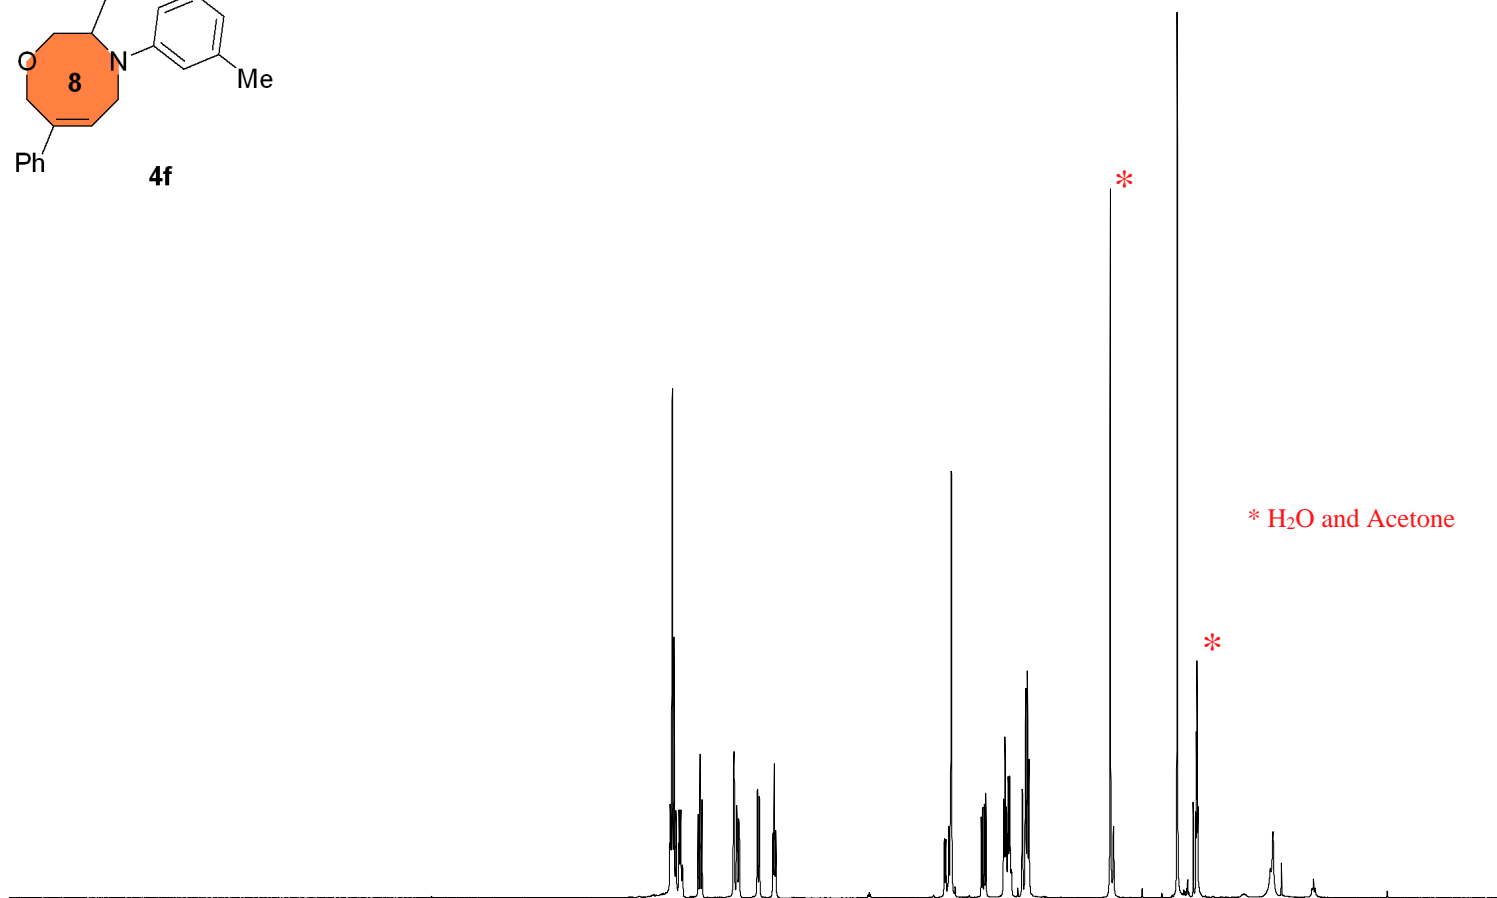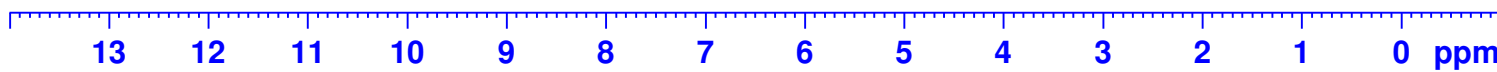

5.06  
0.99  
0.99  
0.99  
0.98  
1.00  
2.98  
1.01  
2.15  
3.04  
3.00

ljx-3-17

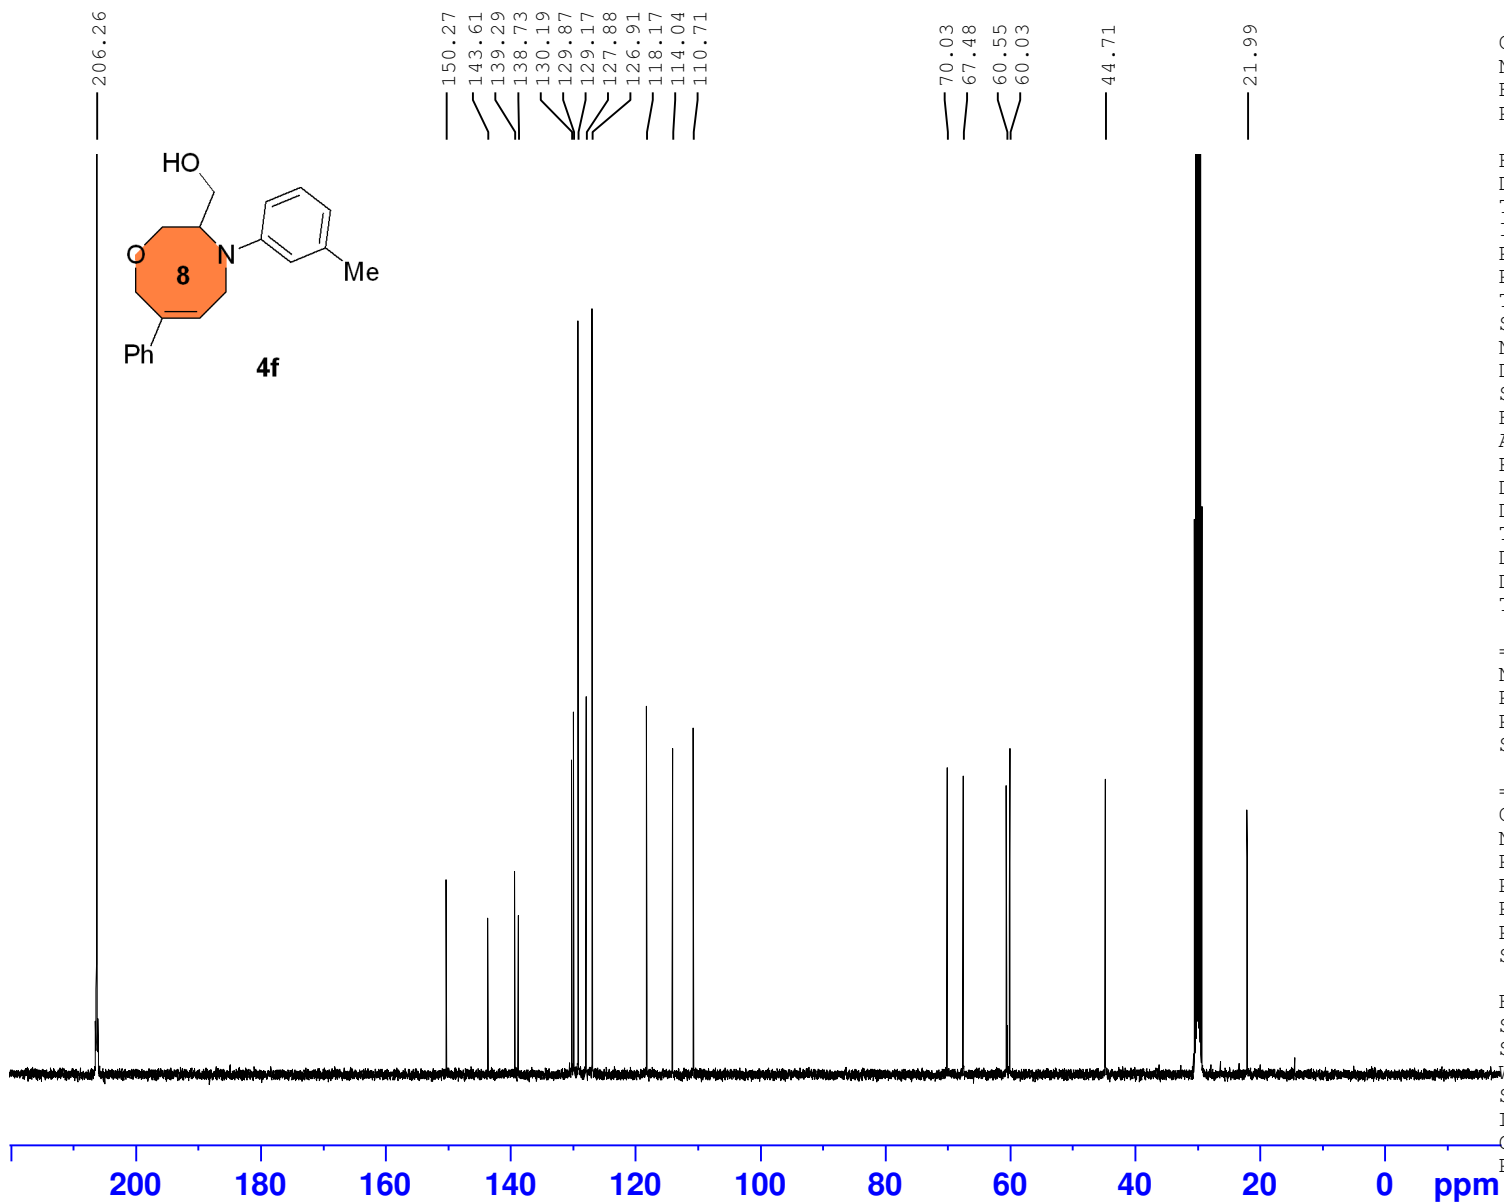

Current Data Parameters  
NAME 3-17  
EXPNO 25  
PROCNO 1

F2 - Acquisition Parameters  
Date\_ 20230322  
Time 3.30  
INSTRUM spect  
PROBHD 5 mm PABBO BB-  
PULPROG zgpg30  
TD 65536  
SOLVENT Acetone  
NS 800  
DS 4  
SWH 24038.461 Hz  
FIDRES 0.366798 Hz  
AQ 1.3631488 sec  
RG 193.13  
DW 20.800 usec  
DE 6.50 usec  
TE 292.1 K  
D1 2.00000000 sec  
D11 0.03000000 sec  
TD0 1

==== CHANNEL f1 =====  
NUC1 13C  
P1 12.00 usec  
PLW1 53.00000000 W  
SFO1 100.6379178 MHz

==== CHANNEL f2 =====  
CPDPRG[2] waltz16  
NUC2 1H  
PCPD2 90.00 usec  
PLW2 14.00000000 W  
PLW12 0.37246999 W  
PLW13 0.30170000 W  
SFO2 400.1916008 MHz

F2 - Processing parameters  
SI 32768  
SF 100.6277712 MHz  
WDW EM  
SSB 0  
LB 1.00 Hz  
GB 0  
PC 1.40

ljx-5-14

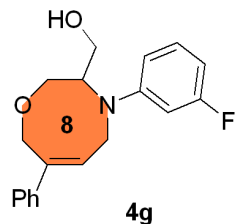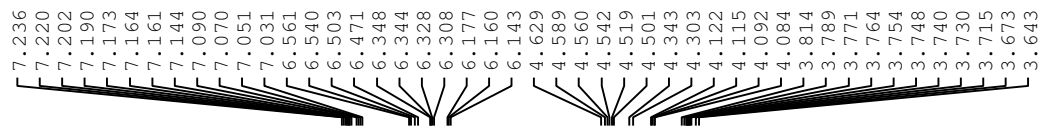

Current Data Parameters  
NAME 20231021-400M  
EXPNO 11  
PROCNO 1

F2 - Acquisition Parameters  
Date\_ 20231020  
Time 22.37  
INSTRUM spect  
PROBHD 5 mm PADUL 13C  
PULPROG zg30  
TD 65536  
SOLVENT CDC13  
NS 6  
DS 2  
SWH 8223.685 Hz  
FIDRES 0.125483 Hz  
AQ 3.9845889 sec  
RG 29.75  
DW 60.800 usec  
DE 6.50 usec  
TE 293.9 K  
D1 1.00000000 sec  
TD0 1

==== CHANNEL f1 =====  
NUC1 1H  
P1 9.90 usec  
PLW1 23.00000000 W  
SFO1 400.1924713 MHz

F2 - Processing parameters  
SI 65536  
SF 400.1900598 MHz  
WDW EM  
SSB 0  
LB 0.30 Hz  
GB 0  
PC 1.00

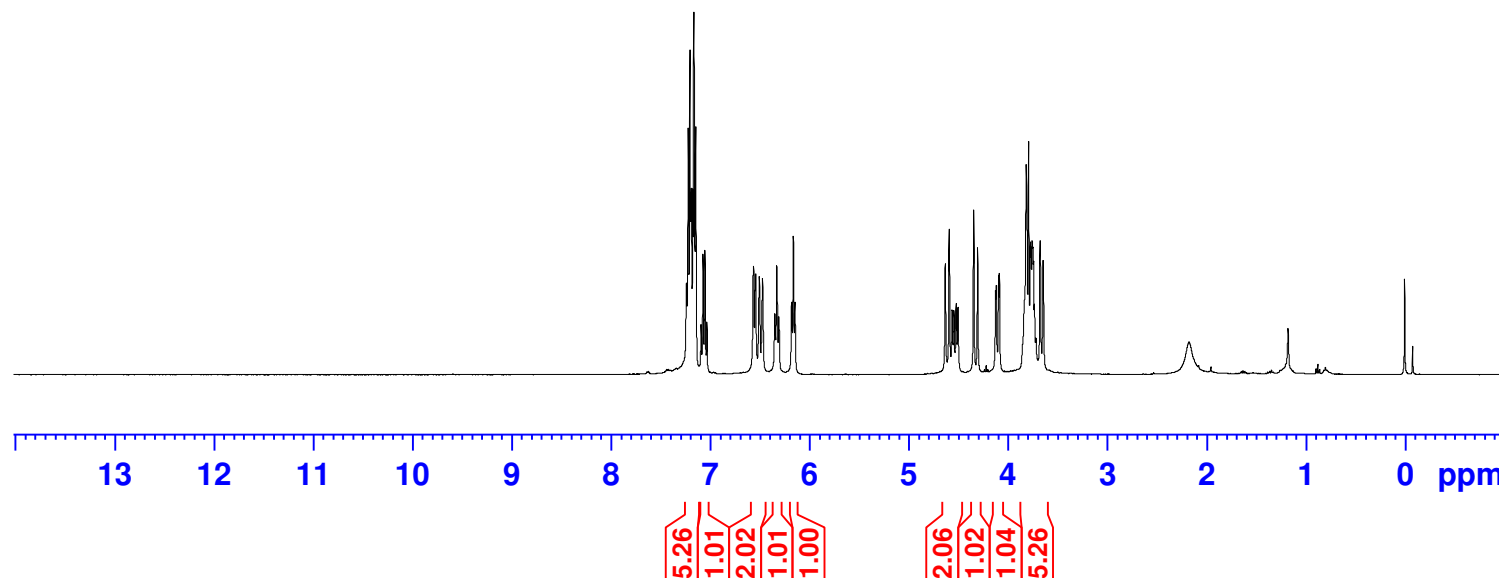

ljx-3-31

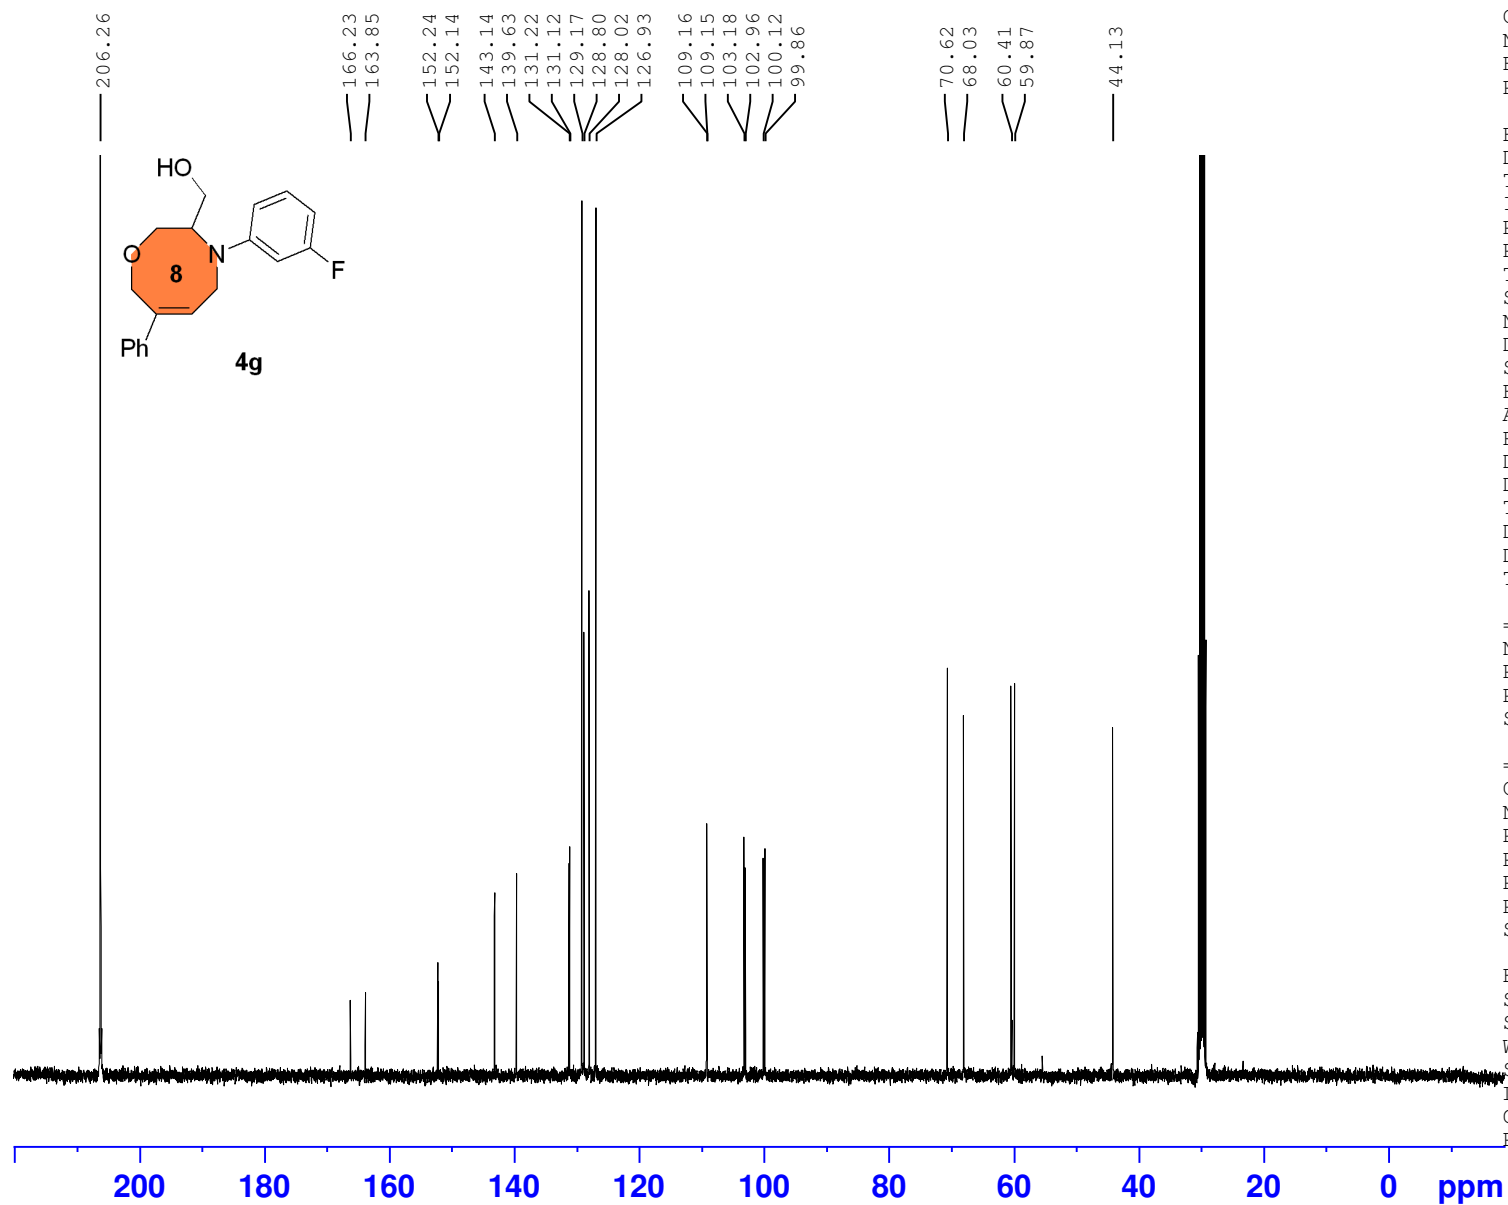

Current Data Parameters  
NAME 2023-3-30-400  
EXPNO 167  
PROCNO 1

F2 - Acquisition Parameters  
Date\_ 20230330  
Time 3.27  
INSTRUM spect  
PROBHD 5 mm PABBO BB-  
PULPROG zgpg30  
TD 65536  
SOLVENT Acetone  
NS 400  
DS 4  
SWH 24038.461 Hz  
FIDRES 0.366798 Hz  
AQ 1.3631488 sec  
RG 193.13  
DW 20.800 usec  
DE 6.50 usec  
TE 291.7 K  
D1 2.00000000 sec  
D11 0.03000000 sec  
TD0 1

==== CHANNEL f1 =====  
NUC1 13C  
P1 12.00 usec  
PLW1 53.00000000 W  
SFO1 100.6379178 MHz

==== CHANNEL f2 =====  
CPDPRG[2] waltz16  
NUC2 1H  
PCPD2 90.00 usec  
PLW2 14.00000000 W  
PLW12 0.37246999 W  
PLW13 0.30170000 W  
SFO2 400.1916008 MHz

F2 - Processing parameters  
SI 32768  
SF 100.6277746 MHz  
WDW EM  
SSB 0  
LB 1.00 Hz  
GB 0  
PC 1.40



# <sup>19</sup>F NMR

LJX-5-14

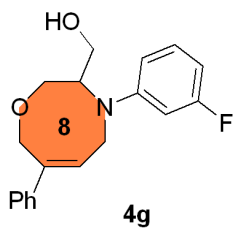

-113.92

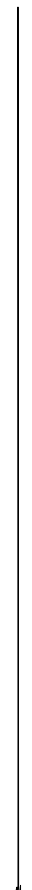

Current Data Parameters  
NAME 0927HH  
EXPNO 5  
PROCNO 1

F2 - Acquisition Parameters  
Date\_ 20230927  
Time 16.29 h  
INSTRUM Avance  
PROBHD z116098\_0833 (  
PULPROG zgig  
TD 131072  
SOLVENT Acetone  
NS 16  
DS 4  
SWH 90909.094 Hz  
FIDRES 1.387163 Hz  
AQ 0.7208960 sec  
RG 101  
DW 5.500 usec  
DE 6.50 usec  
TE 294.4 K  
D1 1.00000000 sec  
D11 0.03000000 sec  
TD0 1  
SFO1 376.4607164 MHz  
NUC1 19F  
P1 18.00 usec  
PLW1 16.73100090 W  
SFO2 400.1316005 MHz  
NUC2 1H  
CPDPRG[2] waltz16  
PCPD2 90.00 usec  
PLW2 20.73200035 W  
PLW12 0.25595000 W

F2 - Processing parameters  
SI 65536  
SF 376.4983662 MHz  
WDW EM  
SSB 0  
LB 0.30 Hz  
GB 0  
PC 1.00

0 -20 -40 -60 -80 -100 -120 -140 -160 -180 -200 ppm

ljx-5-15

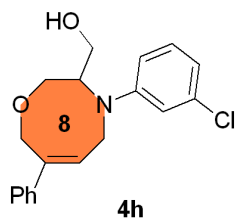

7.346  
7.340  
7.325  
7.319  
7.310  
7.304  
7.295  
7.290  
7.284  
7.278  
7.270  
7.264  
7.257  
7.249  
7.245  
7.240  
7.235  
7.228  
7.172  
7.151  
7.131  
6.897  
6.891  
6.886  
6.846  
6.840  
6.825  
6.819  
6.635  
6.632  
6.616  
6.613  
6.325  
6.309  
6.294  
4.665  
4.650  
4.621  
4.616  
4.608  
4.577  
4.493  
4.455  
4.242  
4.230  
4.211  
4.198  
4.117  
3.962  
3.955  
3.948  
3.938  
3.920  
3.905  
3.809  
3.789  
3.783  
3.758  
3.751  
2.061

Current Data Parameters  
NAME 2023-9-27-400  
EXPNO 8  
PROCNO 1

F2 - Acquisition Parameters  
Date\_ 20230926  
Time 23.25  
INSTRUM spect  
PROBHD 5 mm PADUL 13C  
PULPROG zg30  
TD 65536  
SOLVENT Acetone  
NS 8  
DS 2  
SWH 8223.685 Hz  
FIDRES 0.125483 Hz  
AQ 3.9845889 sec  
RG 29.75  
DW 60.800 usec  
DE 6.50 usec  
TE 291.8 K  
D1 1.00000000 sec  
TD0 1

==== CHANNEL f1 =====  
NUC1 1H  
P1 9.90 usec  
PLW1 23.00000000 W  
SFO1 400.1924713 MHz

F2 - Processing parameters  
SI 65536  
SF 400.1900111 MHz  
WDW EM  
SSB 0  
LB 0.30 Hz  
GB 0  
PC 1.00

\* H<sub>2</sub>O and Acetone

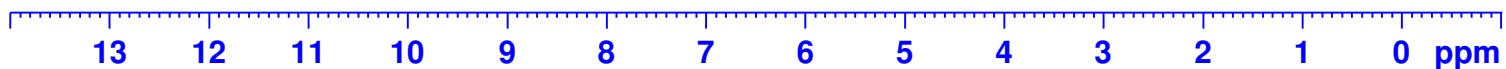

5.06  
1.00  
1.00  
1.01  
0.98  
1.00  
2.04  
1.00  
1.03  
0.79  
2.12  
3.04

ljx-2-99

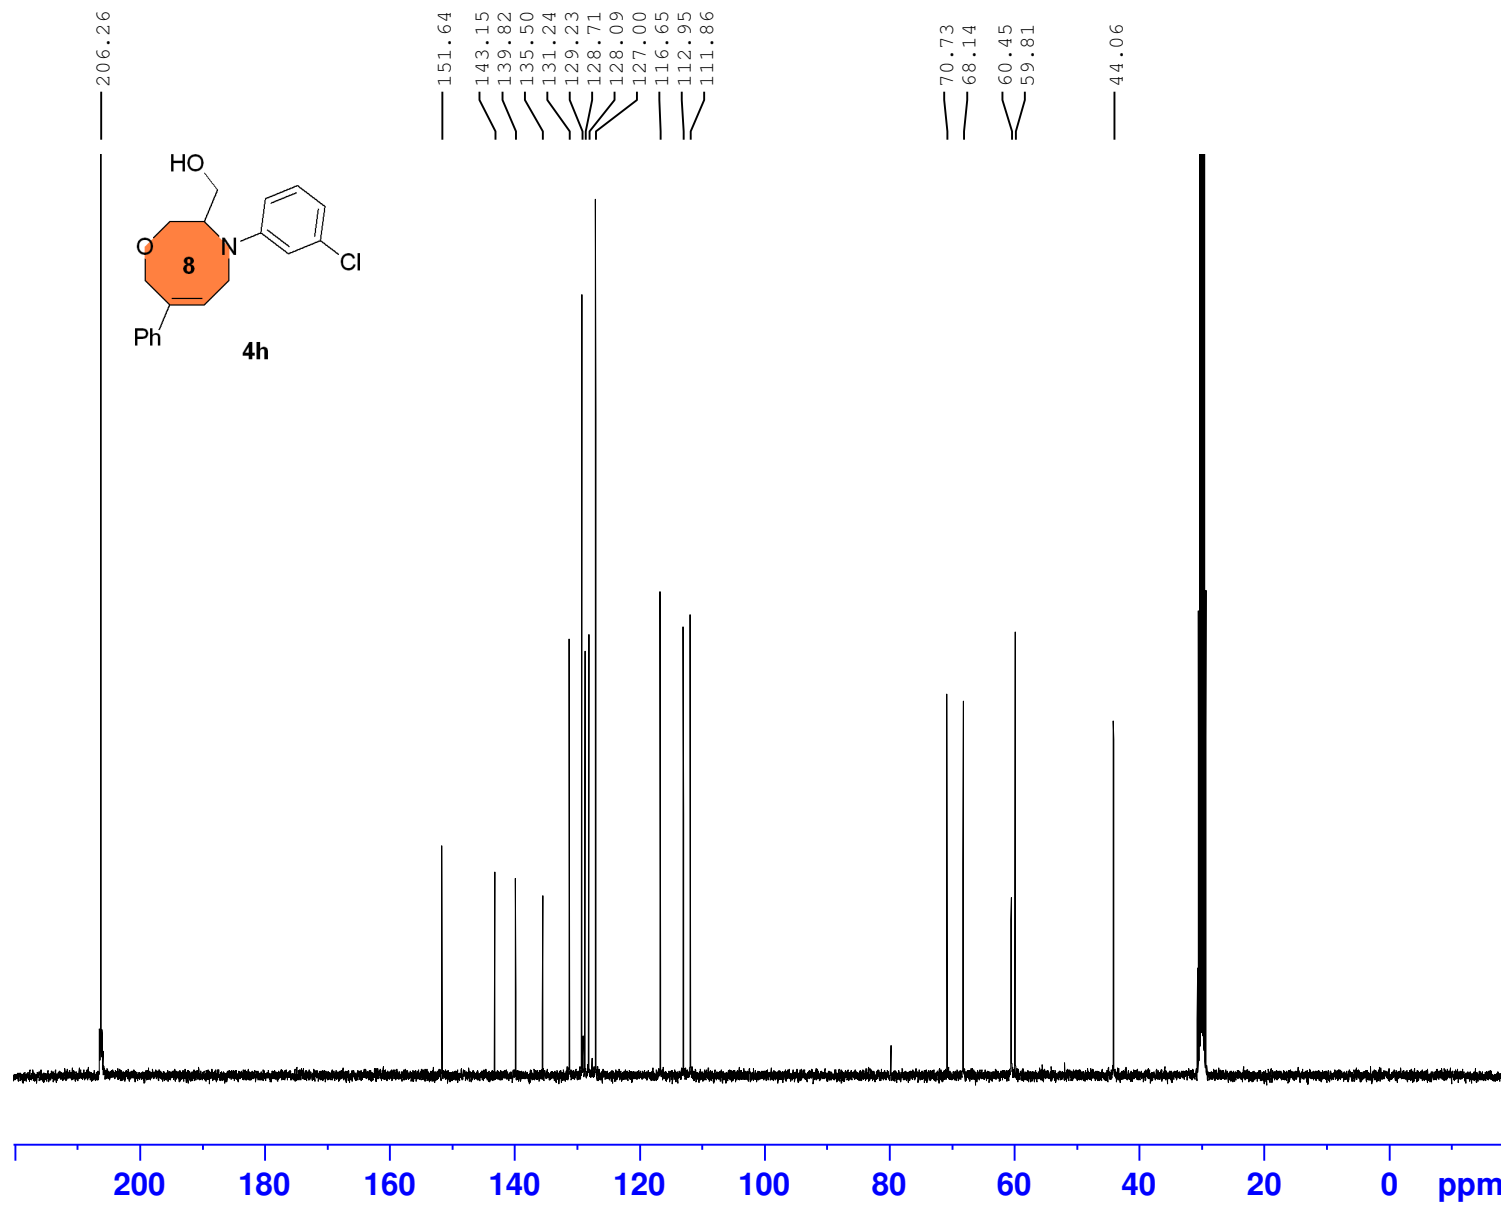

Current Data Parameters  
NAME 20230316-400M  
EXPNO 30  
PROCNO 1

F2 - Acquisition Parameters  
Date\_ 20230316  
Time 4.30  
INSTRUM spect  
PROBHD 5 mm PABBO BB-  
PULPROG zgpg30  
TD 65536  
SOLVENT Acetone  
NS 600  
DS 4  
SWH 24038.461 Hz  
FIDRES 0.366798 Hz  
AQ 1.3631488 sec  
RG 193.13  
DW 20.800 usec  
DE 6.50 usec  
TE 293.9 K  
D1 2.00000000 sec  
D11 0.03000000 sec  
TD0 1

==== CHANNEL f1 =====  
NUC1 13C  
P1 12.00 usec  
PLW1 53.00000000 W  
SFO1 100.6379178 MHz

==== CHANNEL f2 =====  
CPDPRG[2] waltz16  
NUC2 1H  
PCPD2 90.00 usec  
PLW2 14.00000000 W  
PLW12 0.37246999 W  
PLW13 0.30170000 W  
SFO2 400.1916008 MHz

F2 - Processing parameters  
SI 32768  
SF 100.6277693 MHz  
WDW EM  
SSB 0  
LB 1.00 Hz  
GB 0  
PC 1.40

ljx-4-12

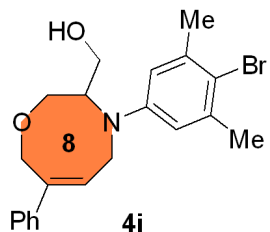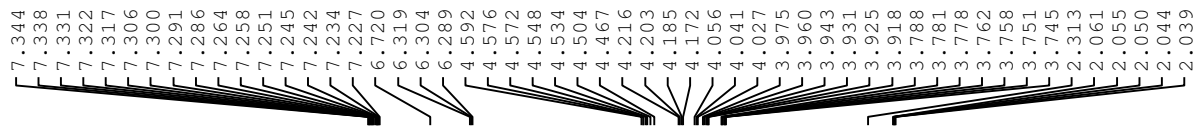

Current Data Parameters  
NAME 20230614-400M  
EXPNO 49  
PROCNO 1

F2 - Acquisition Parameters  
Date\_ 20230614  
Time 7.32  
INSTRUM spect  
PROBHD 5 mm PADUL 13C  
PULPROG zg30  
TD 65536  
SOLVENT Acetone  
NS 6  
DS 2  
SWH 8223.685 Hz  
FIDRES 0.125483 Hz  
AQ 3.9845889 sec  
RG 29.75  
DW 60.800 usec  
DE 6.50 usec  
TE 292.6 K  
D1 1.00000000 sec  
TD0 1

==== CHANNEL f1 =====  
NUC1 1H  
P1 9.90 usec  
PLW1 23.00000000 W  
SFO1 400.1924713 MHz

F2 - Processing parameters  
SI 65536  
SF 400.1900111 MHz  
WDW EM  
SSB 0  
LB 0.30 Hz  
GB 0  
PC 1.00

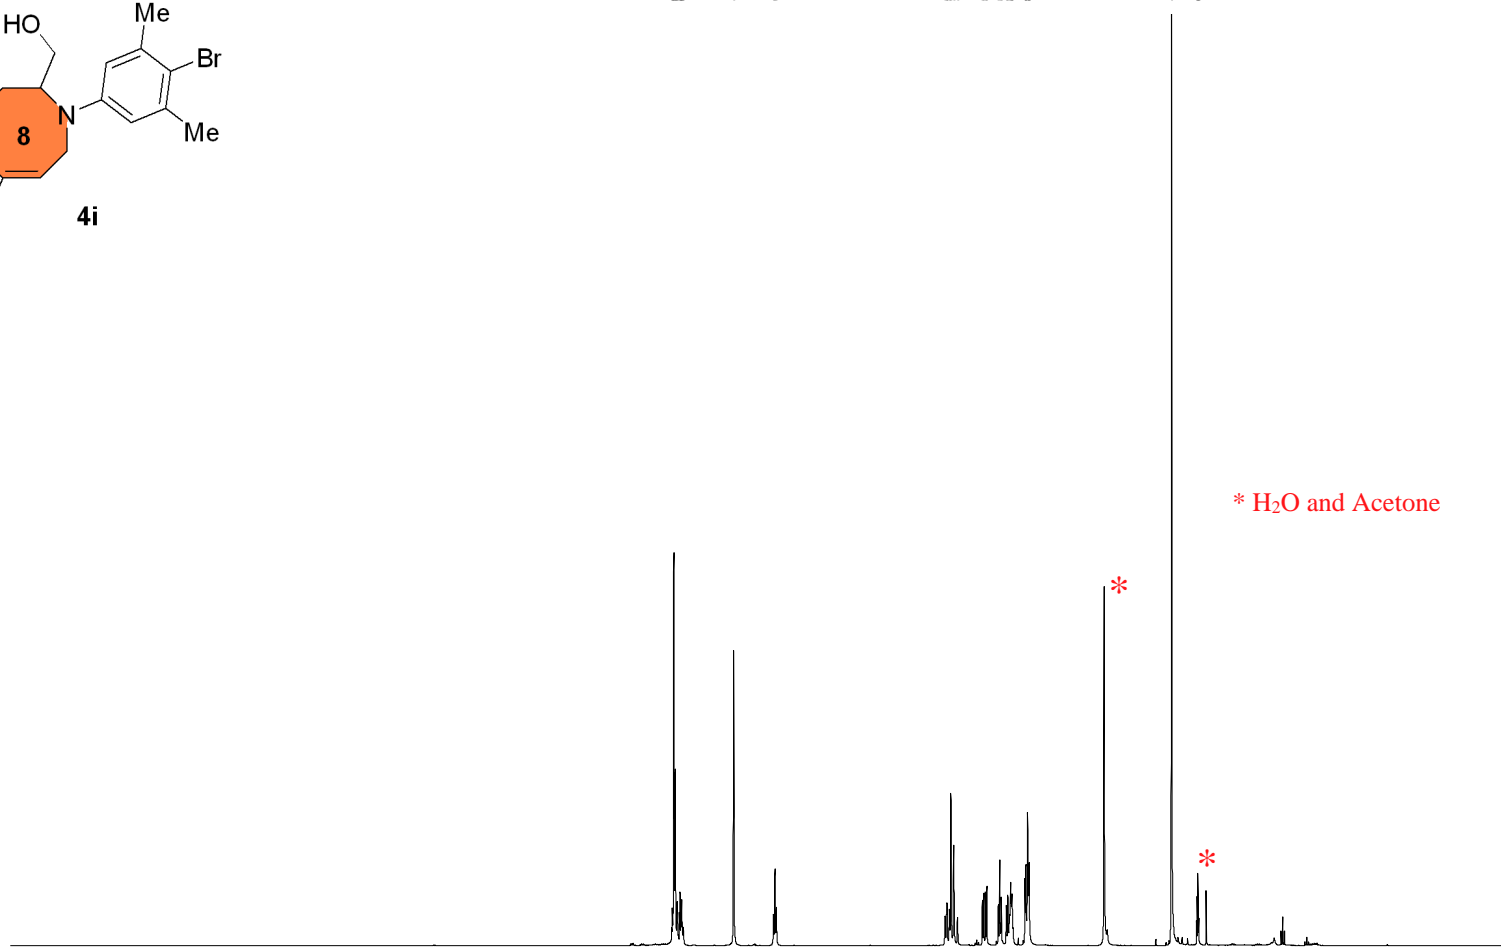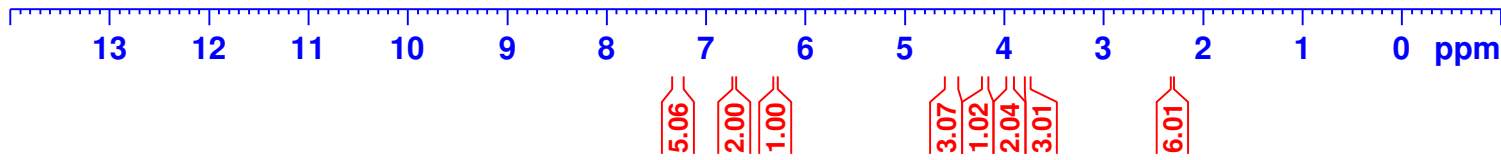

ljx-4-12

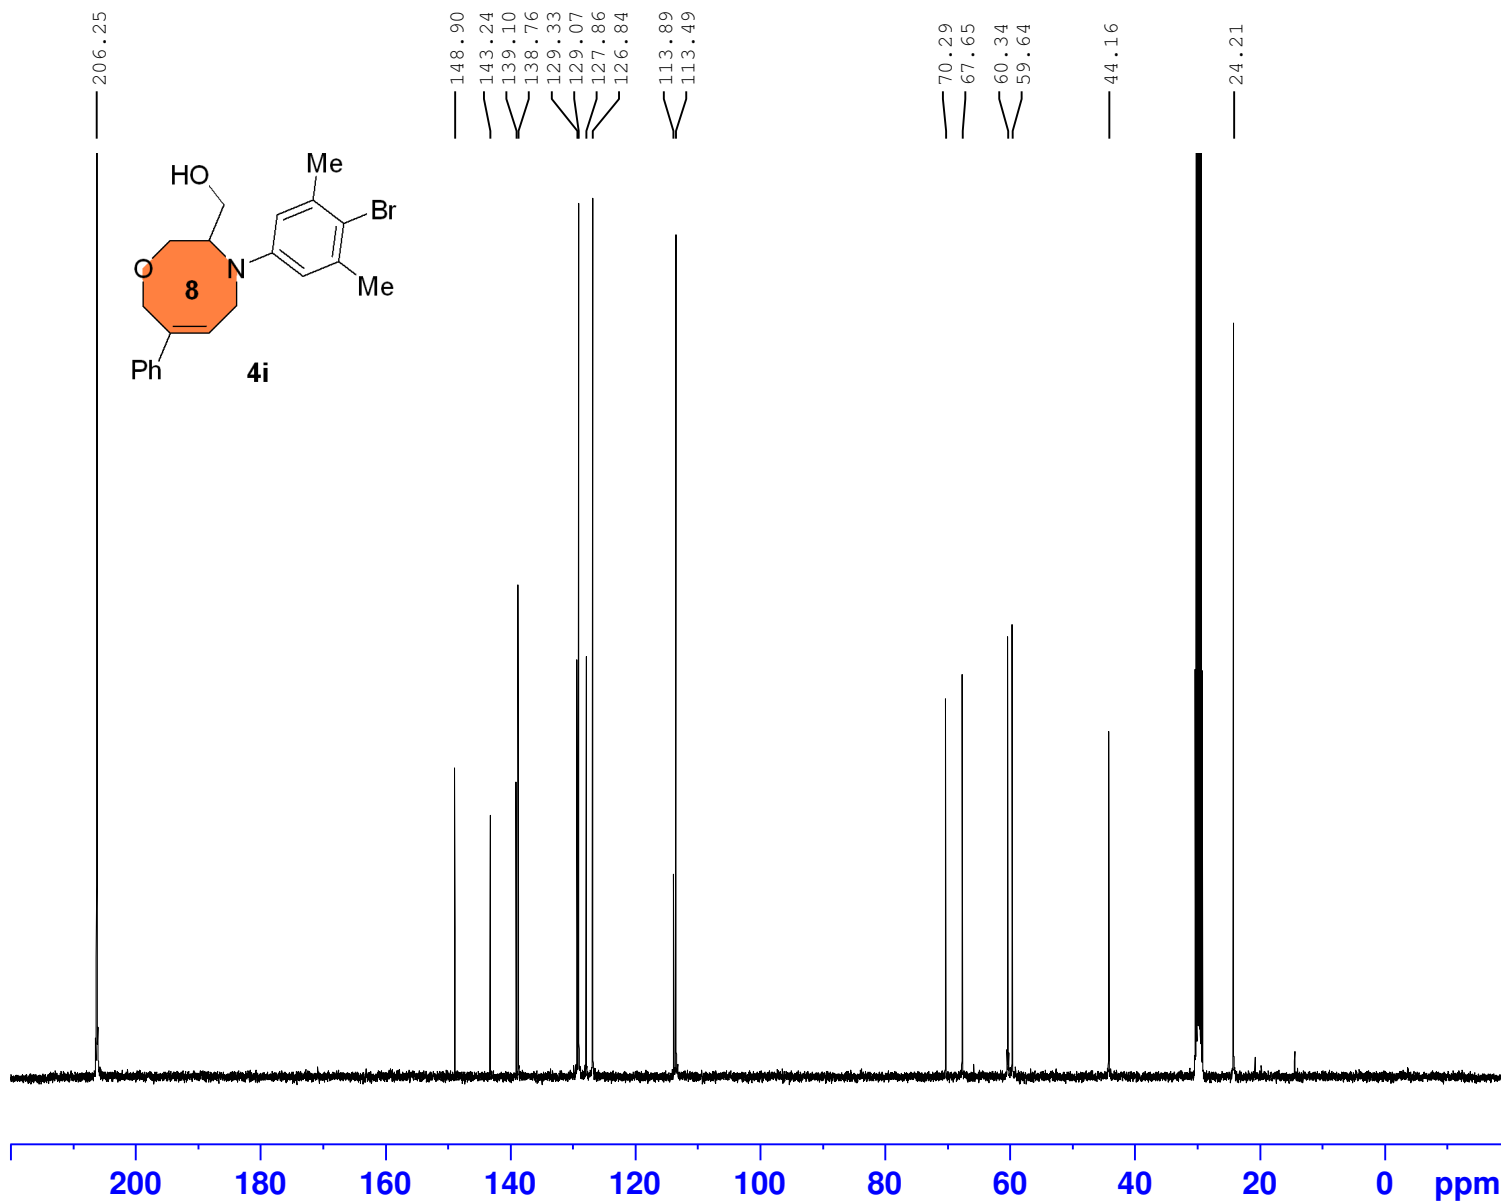

Current Data Parameters  
NAME 20230614-400M  
EXPNO 50  
PROCNO 1

F2 - Acquisition Parameters  
Date\_ 20230614  
Time 8.02  
INSTRUM spect  
PROBHD 5 mm PADUL 13C  
PULPROG zgpg30  
TD 65536  
SOLVENT Acetone  
NS 500  
DS 4  
SWH 24038.461 Hz  
FIDRES 0.366798 Hz  
AQ 1.3631488 sec  
RG 35.06  
DW 20.800 usec  
DE 6.50 usec  
TE 293.1 K  
D1 2.00000000 sec  
D11 0.03000000 sec  
TD0 1

==== CHANNEL f1 =====  
NUC1 13C  
P1 9.80 usec  
PLW1 47.40000153 W  
SFO1 100.6379178 MHz

==== CHANNEL f2 =====  
CPDPRG[2] waltz16  
NUC2 1H  
PCPD2 90.00 usec  
PLW2 23.00000000 W  
PLW12 0.30712000 W  
PLW13 0.24877000 W  
SFO2 400.1916008 MHz

F2 - Processing parameters  
SI 32768  
SF 100.6277834 MHz  
WDW EM  
SSB 0  
LB 1.00 Hz  
GB 0  
PC 1.40

ljx-4-85



Current Data Parameters  
NAME 20231026-400m  
EXPNO 4  
PROCNO 1

F2 - Acquisition Parameters  
Date\_ 20231025  
Time 22.05  
INSTRUM spect  
PROBHD 5 mm PADUL 13C  
PULPROG zg30  
TD 65536  
SOLVENT Acetone  
NS 8  
DS 2  
SWH 8223.685 Hz  
FIDRES 0.125483 Hz  
AQ 3.9845889 sec  
RG 53.3  
DW 60.800 usec  
DE 6.50 usec  
TE 293.8 K  
D1 1.00000000 sec  
TD0 1

==== CHANNEL f1 =====  
NUC1 1H  
P1 9.90 usec  
PLW1 23.00000000 W  
SFO1 400.1924713 MHz

F2 - Processing parameters  
SI 65536  
SF 400.1900112 MHz  
WDW EM  
SSB 0  
LB 0.30 Hz  
GB 0  
PC 1.00

7.337  
7.333  
7.318  
7.315  
7.299  
7.294  
7.286  
7.279  
7.274  
7.259  
7.255  
7.239  
7.235  
7.164  
7.159  
7.148  
7.142  
7.132  
7.111  
7.089  
7.085  
7.064  
6.907  
6.898  
6.893  
6.880  
6.875  
6.866  
6.238  
6.222  
6.207  
4.666  
4.650  
4.623  
4.607  
4.521  
4.482  
4.351  
4.312  
4.243  
4.232  
4.213  
4.201  
4.074  
4.060  
4.046  
3.939  
3.924  
3.911  
3.896  
3.881  
3.854  
3.812  
3.805  
3.799  
3.781  
3.775  
2.060

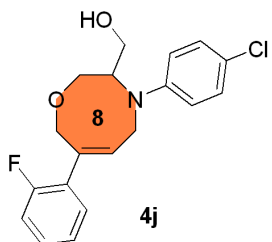

\* H<sub>2</sub>O and Acetone

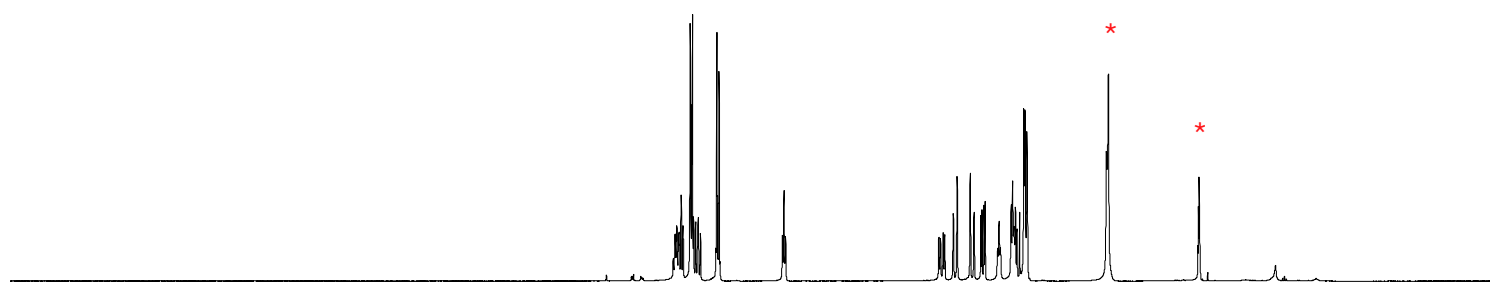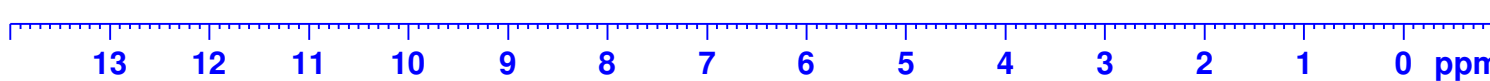

2.08  
4.04  
2.03  
1.00  
1.05  
1.05  
1.06  
1.05  
0.91  
5.29

ljx-3-85

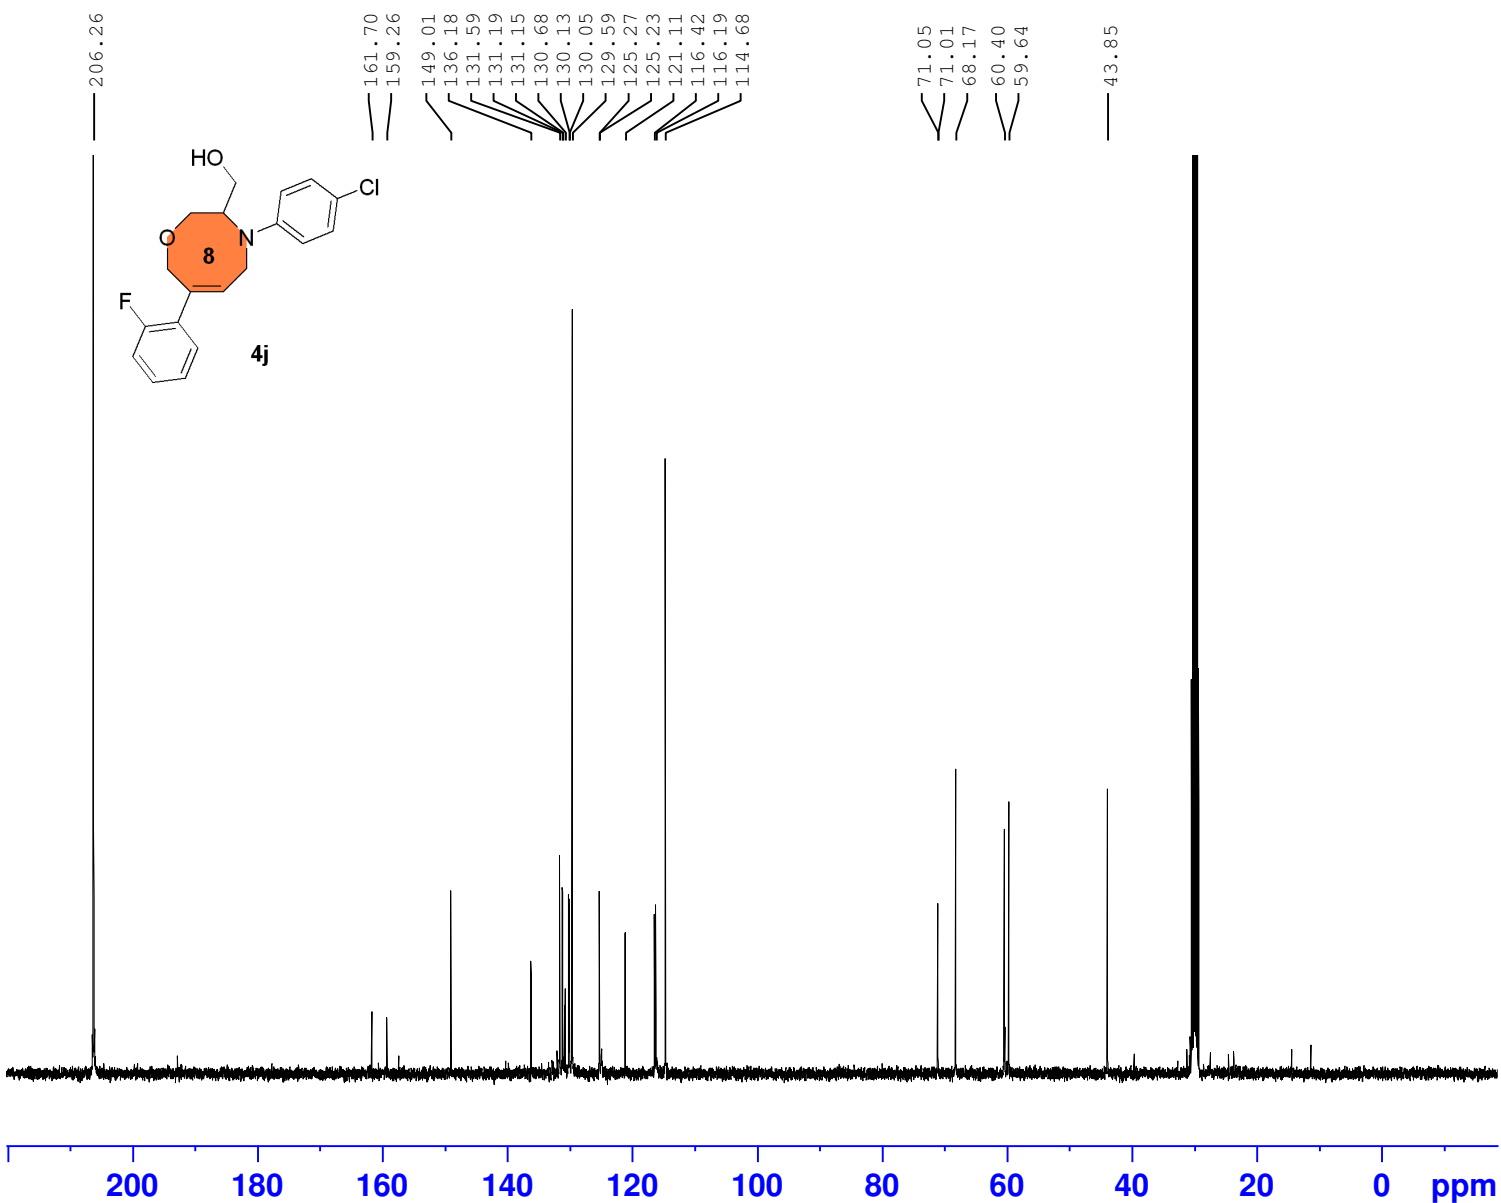

Current Data Parameters  
NAME 2023-5-27-400  
EXPNO 25  
PROCNO 1

F2 - Acquisition Parameters  
Date\_ 20230527  
Time 1.16  
INSTRUM spect  
PROBHD 5 mm PABBO BB-  
PULPROG zgpg30  
TD 65536  
SOLVENT Acetone  
NS 400  
DS 4  
SWH 24038.461 Hz  
FIDRES 0.366798 Hz  
AQ 1.3631488 sec  
RG 193.13  
DW 20.800 usec  
DE 6.50 usec  
TE 293.2 K  
D1 2.00000000 sec  
D11 0.03000000 sec  
TD0 1

==== CHANNEL f1 =====  
NUC1 13C  
P1 12.00 usec  
PLW1 53.00000000 W  
SFO1 100.6379178 MHz

==== CHANNEL f2 =====  
CPDPRG[2] waltz16  
NUC2 1H  
PCPD2 90.00 usec  
PLW2 14.00000000 W  
PLW12 0.37246999 W  
PLW13 0.30170000 W  
SFO2 400.1916008 MHz

F2 - Processing parameters  
SI 32768  
SF 100.6277744 MHz  
WDW EM  
SSB 0  
LB 1.00 Hz  
GB 0  
PC 1.40

# <sup>19</sup>F NMR

LJX-3-85

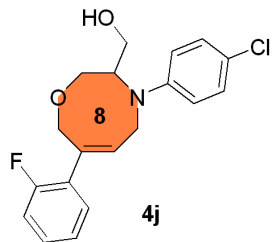

-115.37

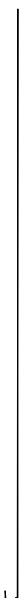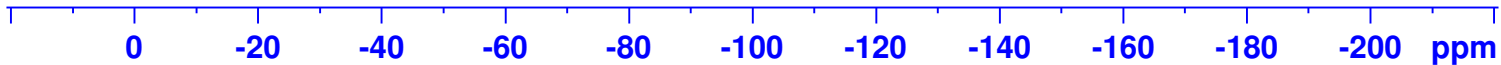

Current Data Parameters  
NAME 0927HH  
EXPNO 1  
PROCNO 1

F2 - Acquisition Parameters  
Date\_ 20230927  
Time 15.48 h  
INSTRUM Avance  
PROBHD z116098\_0833 (  
PULPROG zgig  
TD 131072  
SOLVENT CDCl3  
NS 16  
DS 4  
SWH 90909.094 Hz  
FIDRES 1.387163 Hz  
AQ 0.7208960 sec  
RG 101  
DW 5.500 usec  
DE 6.50 usec  
TE 294.5 K  
D1 1.00000000 sec  
D11 0.03000000 sec  
TD0 1  
SFO1 376.4607164 MHz  
NUC1 19F  
P1 18.00 usec  
PLW1 16.73100090 W  
SFO2 400.1316005 MHz  
NUC2 1H  
CPDPRG[2] waltz16  
PCPD2 90.00 usec  
PLW2 20.73200035 W  
PLW12 0.25595000 W

F2 - Processing parameters  
SI 65536  
SF 376.4983662 MHz  
WDW EM  
SSB 0  
LB 0.30 Hz  
GB 0  
PC 1.00



LJX-3-75

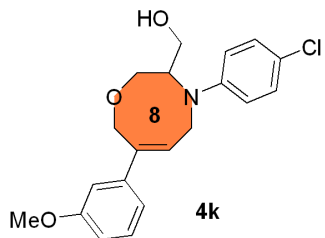

7.246  
7.226  
7.206  
7.172  
7.163  
7.157  
7.145  
7.140  
7.131  
6.905  
6.903  
6.893  
6.886  
6.884  
6.877  
6.870  
6.861  
6.843  
6.837  
6.822  
6.816  
6.333  
6.318  
6.303  
4.635  
4.621  
4.591  
4.577  
4.539  
4.475  
4.437  
4.214  
4.201  
4.183  
4.169  
3.942  
3.927  
3.900  
3.885  
3.778  
3.758  
3.747  
3.741  
2.061  
2.055  
2.050  
2.044  
2.039

Current Data Parameters  
NAME 2023-5-20-400  
EXPNO 27  
PROCNO 1

F2 - Acquisition Parameters  
Date\_ 20230520  
Time 0.37  
INSTRUM spect  
PROBHD 5 mm PABBO BB-  
PULPROG zg30  
TD 65536  
SOLVENT Acetone  
NS 10  
DS 2  
SWH 8223.685 Hz  
FIDRES 0.125483 Hz  
AQ 3.9845889 sec  
RG 61.19  
DW 60.800 usec  
DE 6.50 usec  
TE 288.2 K  
D1 1.00000000 sec  
TD0 1

==== CHANNEL f1 =====  
NUC1 1H  
P1 14.68 usec  
PLW1 14.00000000 W  
SFO1 400.1924713 MHz

F2 - Processing parameters  
SI 65536  
SF 400.1900121 MHz  
WDW EM  
SSB 0  
LB 0.30 Hz  
GB 0  
PC 1.00

\* H<sub>2</sub>O and Acetone

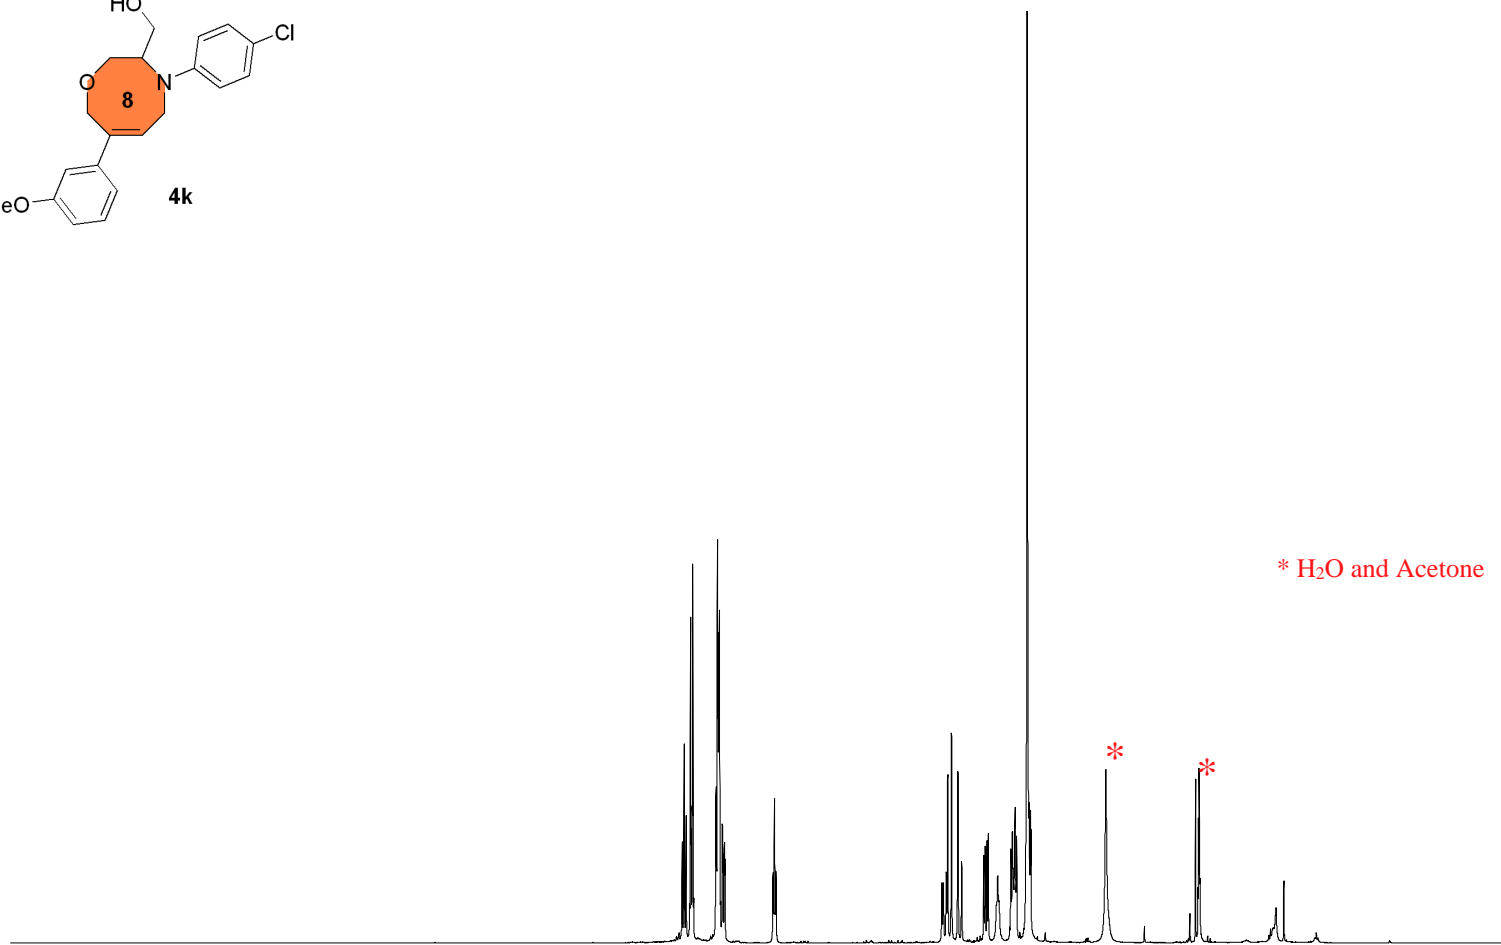

13 12 11 10 9 8 7 6 5 4 3 2 1 0 ppm

1.05  
2.02  
4.04  
1.01  
1.00  
1.00  
2.07  
1.04  
2.09  
6.02

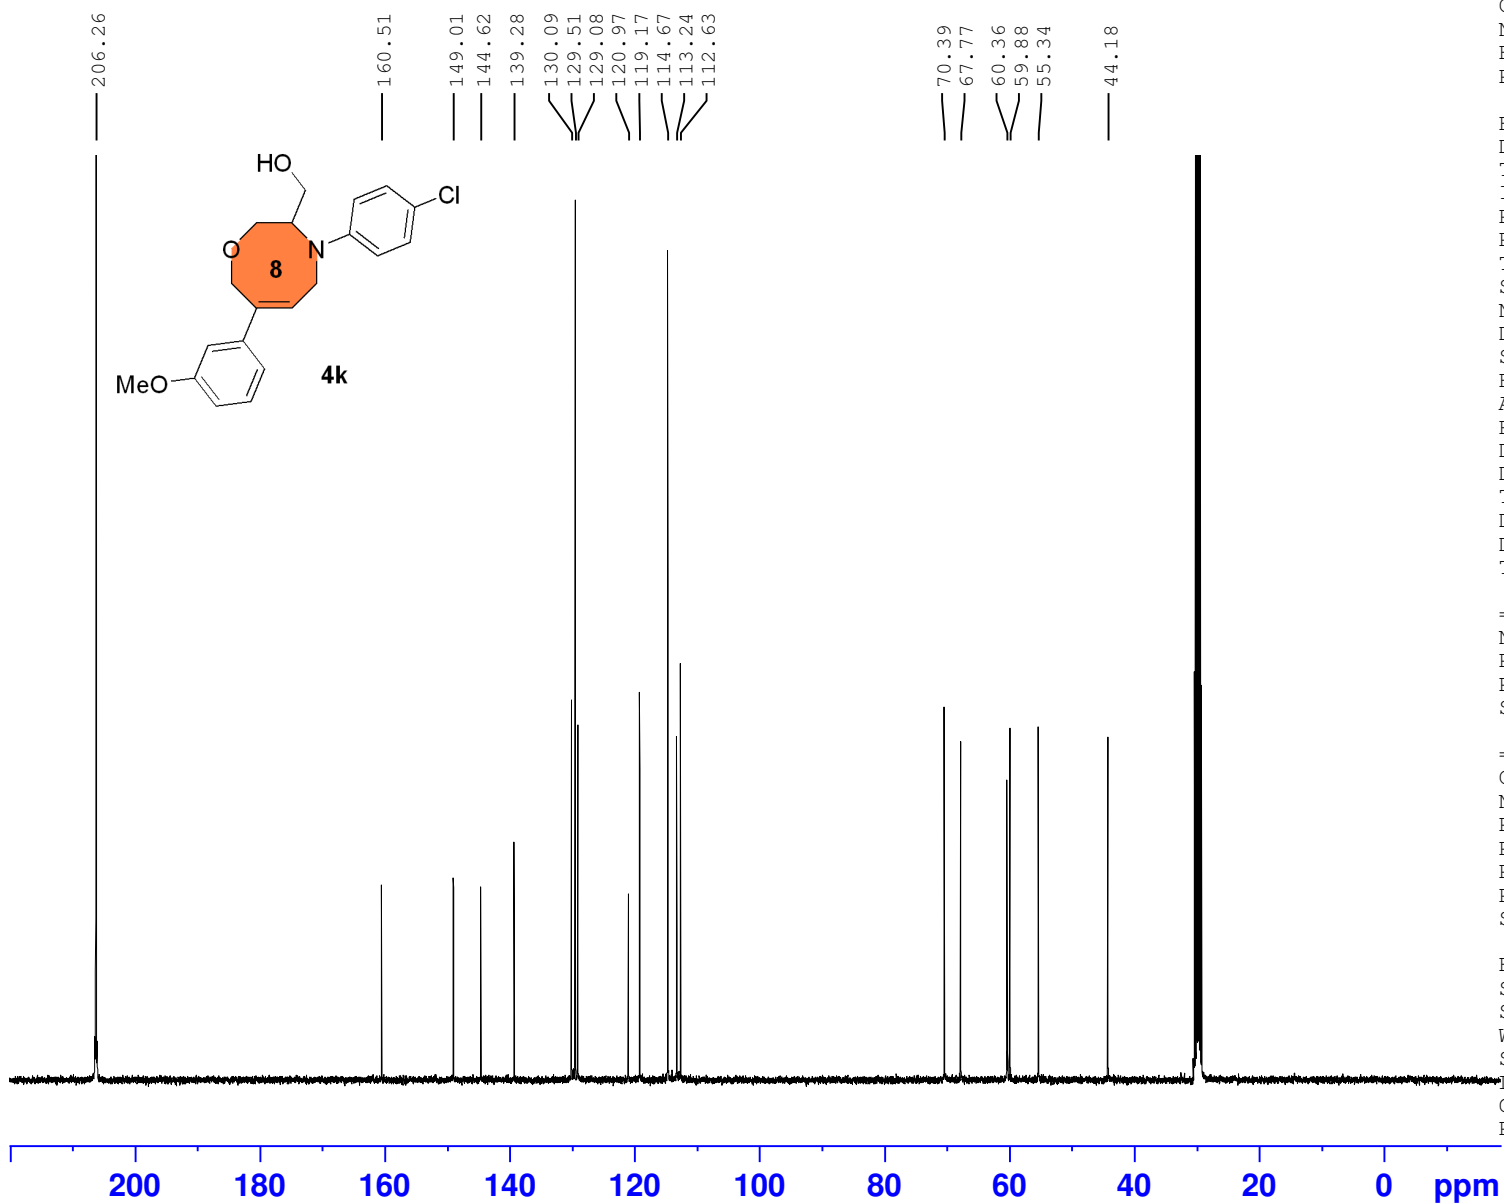

Current Data Parameters  
 NAME 2023-5-20-400  
 EXPNO 28  
 PROCNO 1

F2 - Acquisition Parameters  
 Date\_ 20230520  
 Time 1.35  
 INSTRUM spect  
 PROBHD 5 mm PABBO BB-  
 PULPROG zgpg30  
 TD 65536  
 SOLVENT Acetone  
 NS 1000  
 DS 4  
 SWH 24038.461 Hz  
 FIDRES 0.366798 Hz  
 AQ 1.3631488 sec  
 RG 193.13  
 DW 20.800 usec  
 DE 6.50 usec  
 TE 289.0 K  
 D1 2.00000000 sec  
 D11 0.03000000 sec  
 TD0 1

==== CHANNEL f1 =====  
 NUC1 13C  
 P1 12.00 usec  
 PLW1 53.00000000 W  
 SFO1 100.6379178 MHz

==== CHANNEL f2 =====  
 CPDPRG[2] waltz16  
 NUC2 1H  
 PCPD2 90.00 usec  
 PLW2 14.00000000 W  
 PLW12 0.37246999 W  
 PLW13 0.30170000 W  
 SFO2 400.1916008 MHz

F2 - Processing parameters  
 SI 32768  
 SF 100.6277826 MHz  
 WDW EM  
 SSB 0  
 LB 1.00 Hz  
 GB 0  
 PC 1.40

LJX-3-74

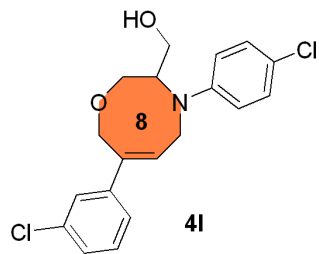

7.368  
7.363  
7.346  
7.340  
7.337  
7.322  
7.296  
7.281  
7.277  
7.274  
7.270  
7.167  
7.145  
6.898  
6.875  
6.384  
6.370  
6.356  
4.637  
4.623  
4.593  
4.579  
4.546  
4.509  
4.495  
4.457  
4.199  
4.185  
4.168  
4.154  
3.988  
3.974  
3.959  
3.943  
3.929  
3.911  
3.905  
3.803  
3.796  
3.785  
3.771  
3.754  
2.061  
2.055  
2.050  
2.044  
2.039

Current Data Parameters  
NAME 2023-5-20-400  
EXPNO 31  
PROCNO 1

F2 - Acquisition Parameters  
Date\_ 20230520  
Time 2.42  
INSTRUM spect  
PROBHD 5 mm PABBO BB-  
PULPROG zg30  
TD 65536  
SOLVENT Acetone  
NS 10  
DS 2  
SWH 8223.685 Hz  
FIDRES 0.125483 Hz  
AQ 3.9845889 sec  
RG 68.24  
DW 60.800 usec  
DE 6.50 usec  
TE 288.5 K  
D1 1.00000000 sec  
TD0 1

==== CHANNEL f1 =====  
NUC1 1H  
P1 14.68 usec  
PLW1 14.00000000 W  
SFO1 400.1924713 MHz

F2 - Processing parameters  
SI 65536  
SF 400.1900122 MHz  
WDW EM  
SSB 0  
LB 0.30 Hz  
GB 0  
PC 1.00

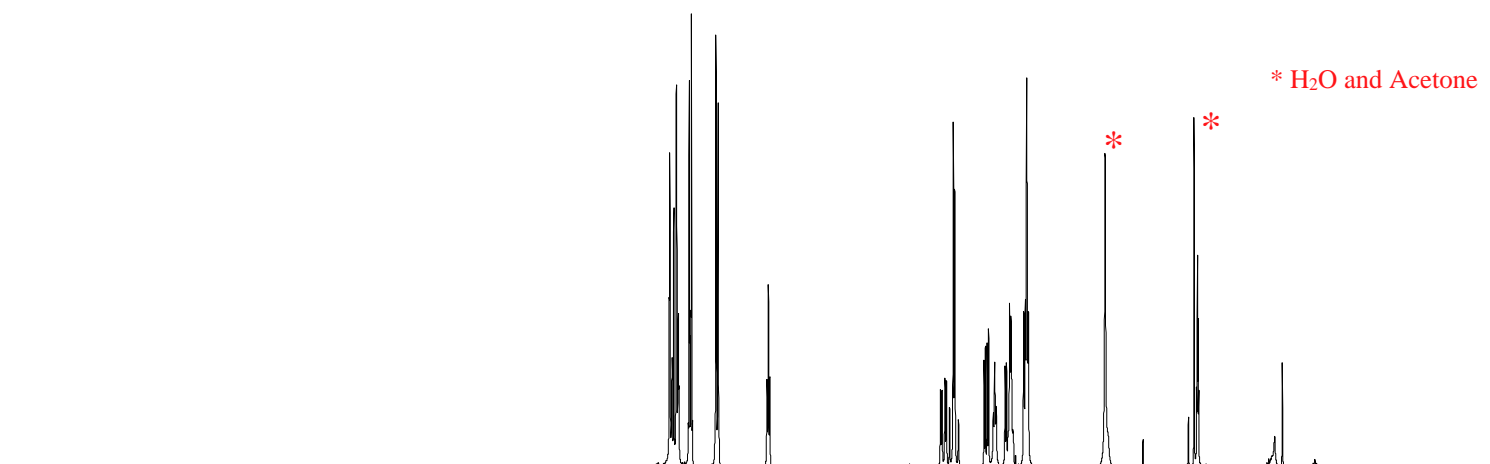

13 12 11 10 9 8 7 6 5 4 3 2 1 0 ppm

4.06  
2.01  
2.02  
1.00  
1.03  
2.06  
1.03  
2.02  
3.00

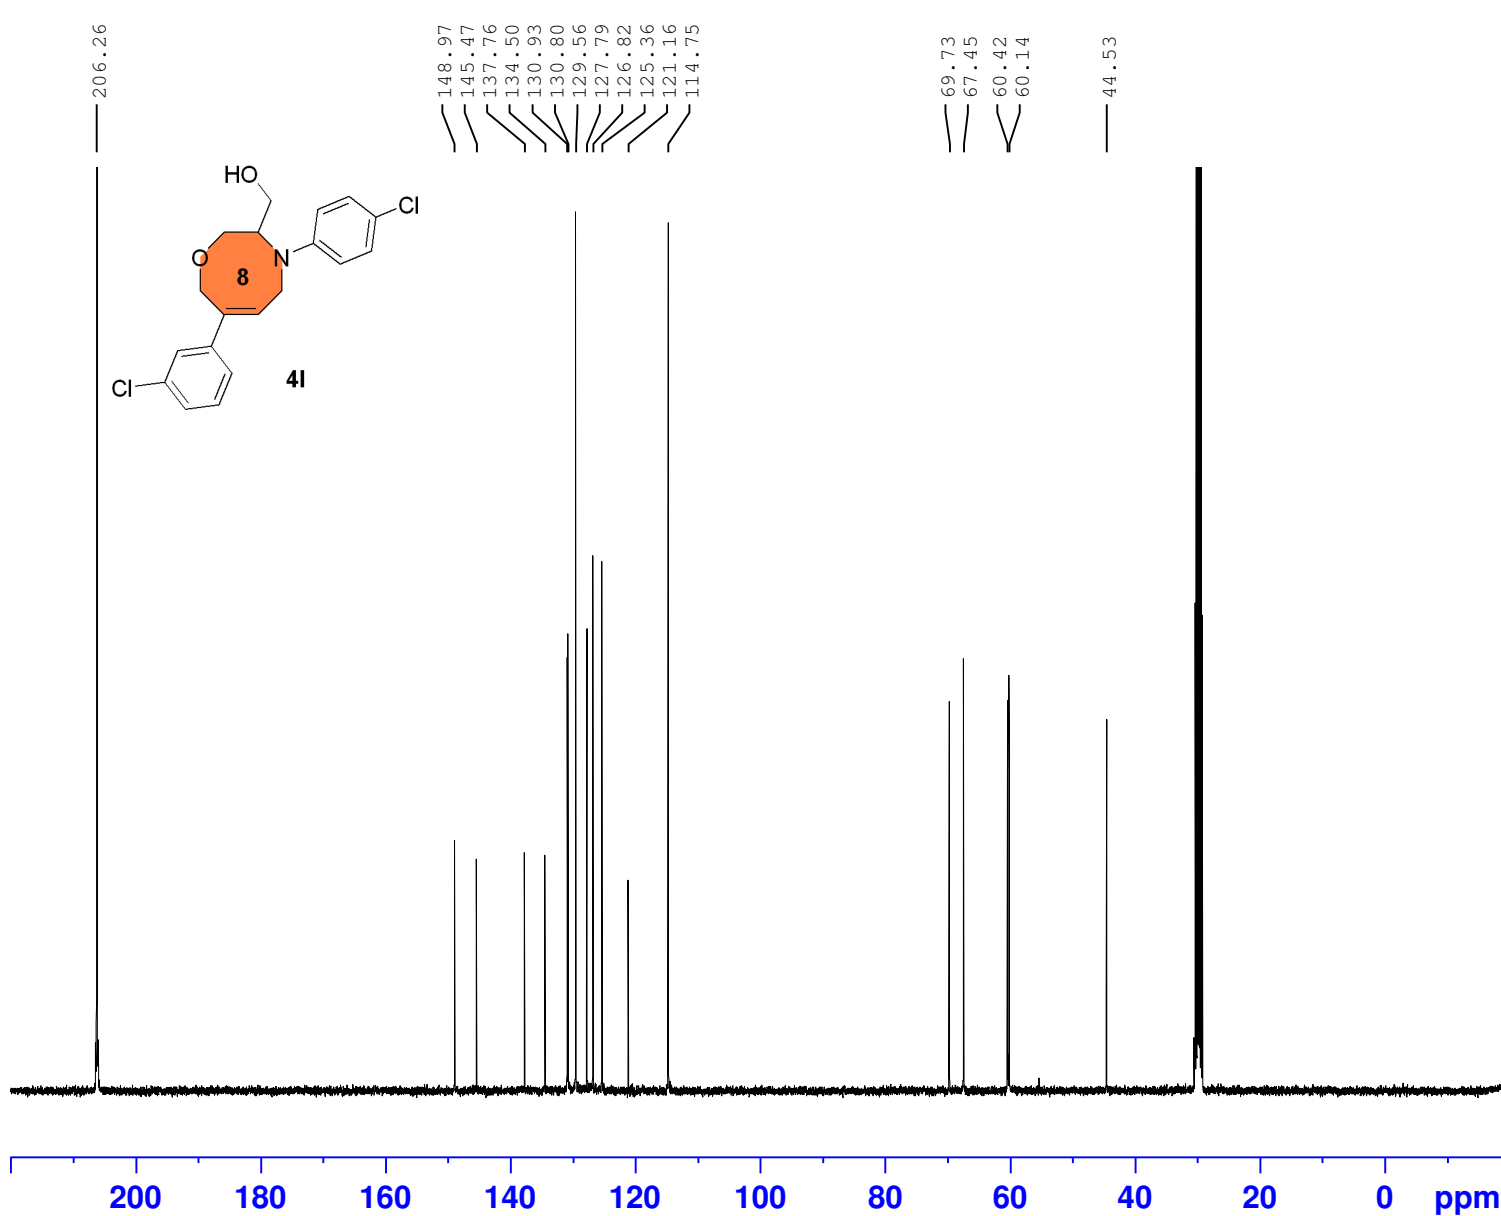

Current Data Parameters  
 NAME 2023-5-20-400  
 EXPNO 32  
 PROCNO 1

F2 - Acquisition Parameters  
 Date\_ 20230520  
 Time 3.40  
 INSTRUM spect  
 PROBHD 5 mm PABBO BB-  
 PULPROG zgpg30  
 TD 65536  
 SOLVENT Acetone  
 NS 1000  
 DS 4  
 SWH 24038.461 Hz  
 FIDRES 0.366798 Hz  
 AQ 1.3631488 sec  
 RG 193.13  
 DW 20.800 usec  
 DE 6.50 usec  
 TE 289.1 K  
 D1 2.00000000 sec  
 D11 0.03000000 sec  
 TD0 1

==== CHANNEL f1 =====  
 NUC1 13C  
 P1 12.00 usec  
 PLW1 53.00000000 W  
 SFO1 100.6379178 MHz

==== CHANNEL f2 =====  
 CPDPRG[2] waltz16  
 NUC2 1H  
 PCPD2 90.00 usec  
 PLW2 14.00000000 W  
 PLW12 0.37246999 W  
 PLW13 0.30170000 W  
 SFO2 400.1916008 MHz

F2 - Processing parameters  
 SI 32768  
 SF 100.6277811 MHz  
 WDW EM  
 SSB 0  
 LB 1.00 Hz  
 GB 0  
 PC 1.40

ljx-3-95



Current Data Parameters  
NAME 20231028-400M  
EXPNO 6  
PROCNO 1

F2 - Acquisition Parameters  
Date\_ 20231027  
Time 22.03  
INSTRUM spect  
PROBHD 5 mm PADUL 13C  
PULPROG zg30  
TD 65536  
SOLVENT Acetone  
NS 8  
DS 0  
SWH 8223.685 Hz  
FIDRES 0.125483 Hz  
AQ 3.9845889 sec  
RG 29.75  
DW 60.800 usec  
DE 6.50 usec  
TE 292.4 K  
D1 1.00000000 sec  
TD0 1

==== CHANNEL f1 =====  
NUC1 1H  
P1 9.90 usec  
PLW1 23.00000000 W  
SFO1 400.1924713 MHz

F2 - Processing parameters  
SI 65536  
SF 400.1900111 MHz  
WDW EM  
SSB 0  
LB 0.30 Hz  
GB 0  
PC 1.00

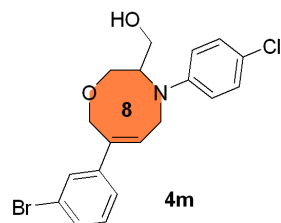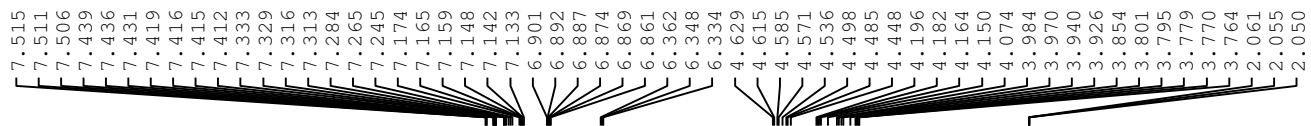

\* H<sub>2</sub>O and Acetone

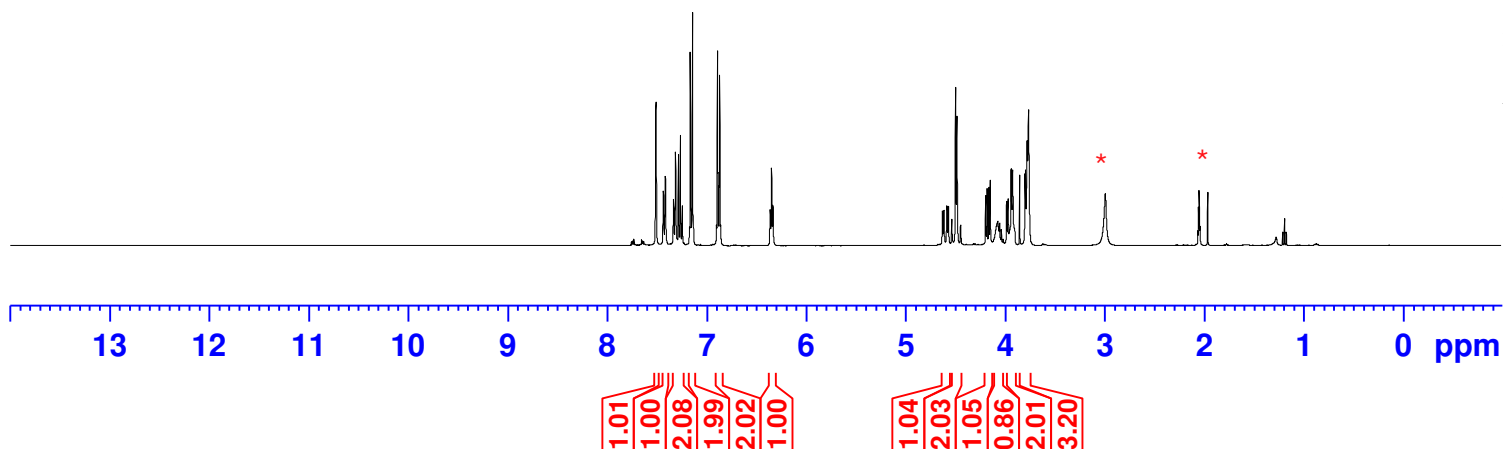

ljx-3-95

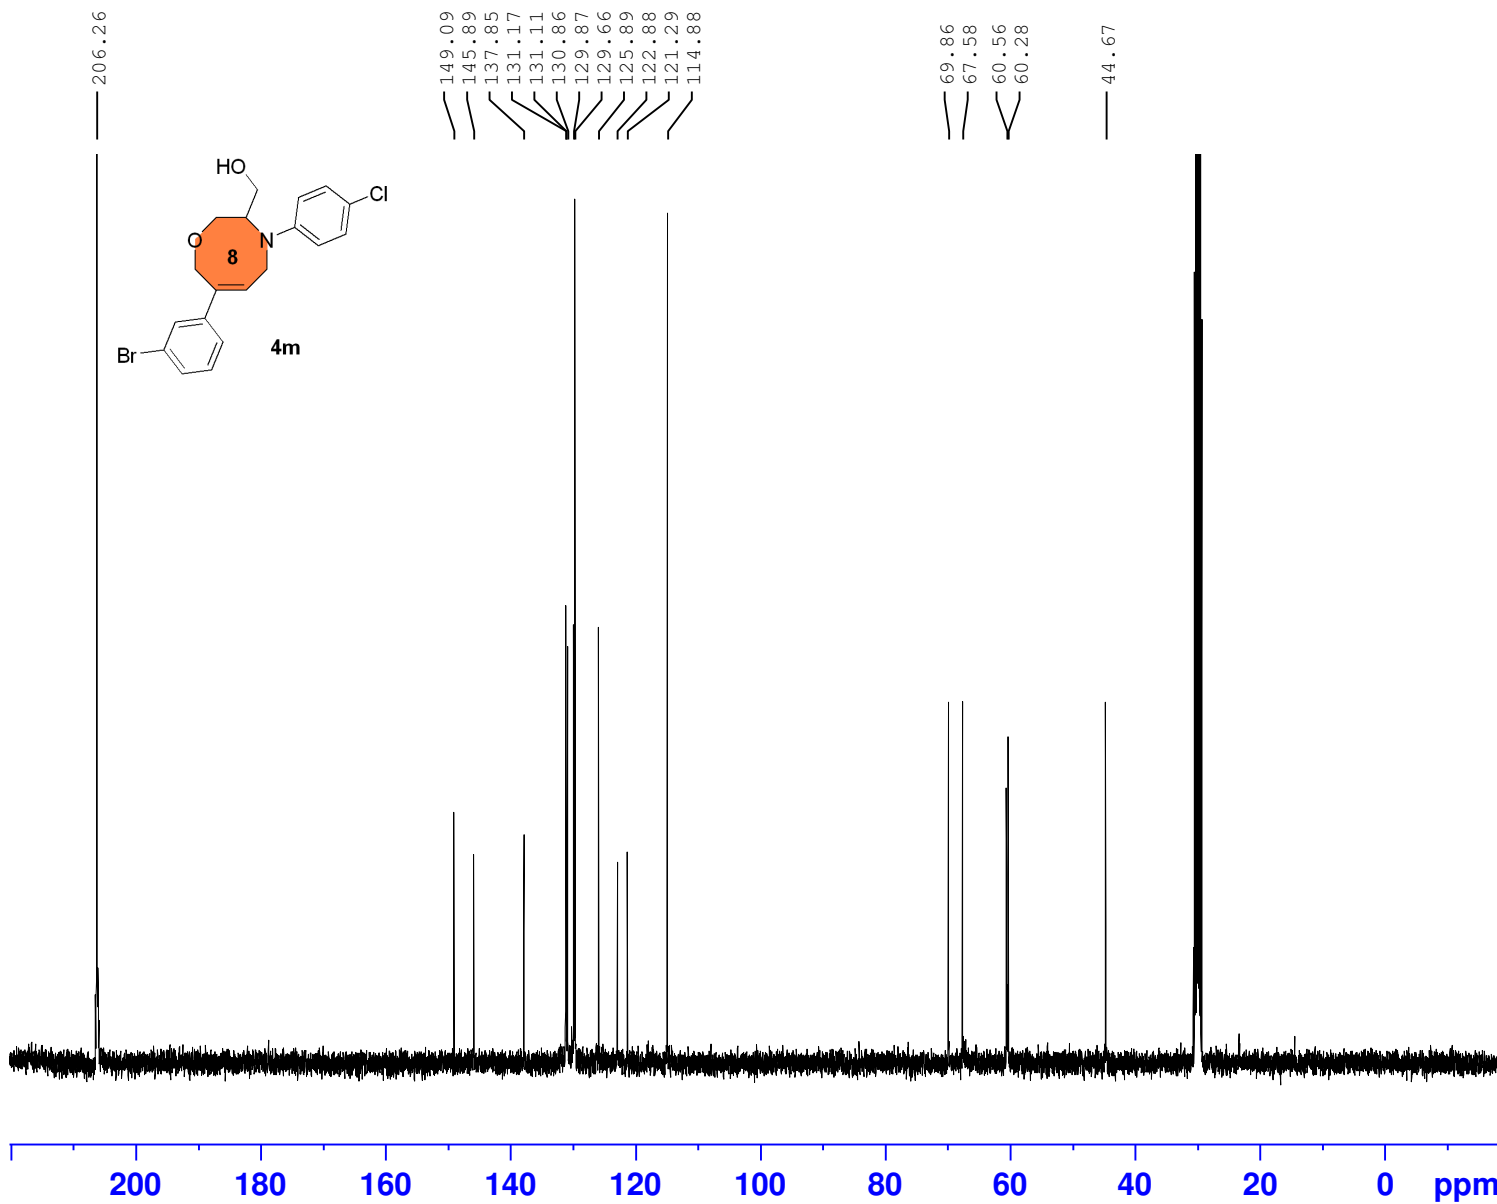

Current Data Parameters  
NAME 20230531-400M  
EXPNO 210  
PROCNO 1

F2 - Acquisition Parameters  
Date\_ 20230531  
Time 7.53  
INSTRUM spect  
PROBHD 5 mm PABBO BB-  
PULPROG zgpg30  
TD 65536  
SOLVENT Acetone  
NS 400  
DS 4  
SWH 24038.461 Hz  
FIDRES 0.366798 Hz  
AQ 1.3631488 sec  
RG 193.13  
DW 20.800 usec  
DE 6.50 usec  
TE 294.1 K  
D1 2.00000000 sec  
D11 0.03000000 sec  
TD0 1

==== CHANNEL f1 =====  
NUC1 13C  
P1 12.00 usec  
PLW1 53.00000000 W  
SFO1 100.6379178 MHz

==== CHANNEL f2 =====  
CPDPRG[2] waltz16  
NUC2 1H  
PCPD2 90.00 usec  
PLW2 14.00000000 W  
PLW12 0.37246999 W  
PLW13 0.30170000 W  
SFO2 400.1916008 MHz

F2 - Processing parameters  
SI 32768  
SF 100.6277699 MHz  
WDW EM  
SSB 0  
LB 1.00 Hz  
GB 0  
PC 1.40

ljx-3-99

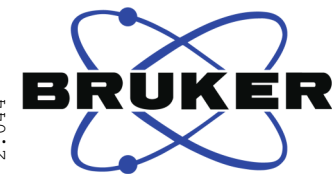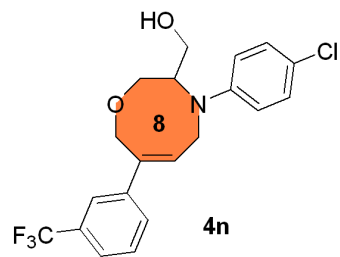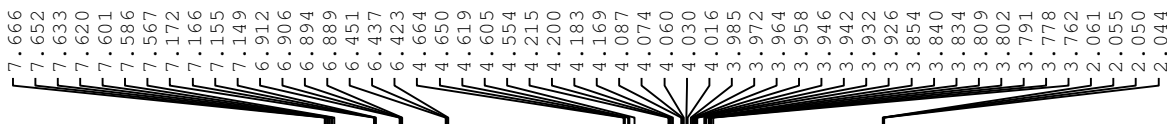

Current Data Parameters  
NAME 2023-9-19-400  
EXPNO 26  
PROCNO 1

F2 - Acquisition Parameters  
Date\_ 20230918  
Time 23.22  
INSTRUM spect  
PROBHD 5 mm PADUL 13C  
PULPROG zg30  
TD 65536  
SOLVENT Acetone  
NS 8  
DS 2  
SWH 8223.685 Hz  
FIDRES 0.125483 Hz  
AQ 3.9845889 sec  
RG 100.49  
DW 60.800 usec  
DE 6.50 usec  
TE 289.9 K  
D1 1.00000000 sec  
TD0 1

==== CHANNEL f1 =====  
NUC1 1H  
P1 9.90 usec  
PLW1 23.00000000 W  
SFO1 400.1924713 MHz

F2 - Processing parameters  
SI 65536  
SF 400.1900111 MHz  
WDW EM  
SSB 0  
LB 0.30 Hz  
GB 0  
PC 1.00

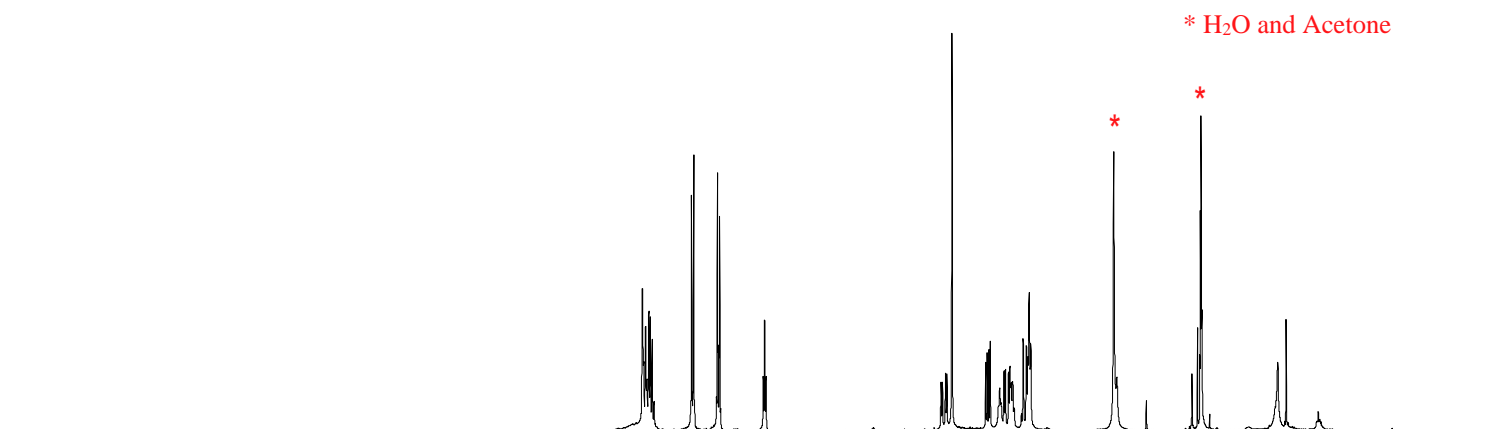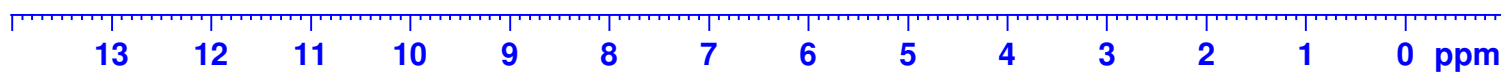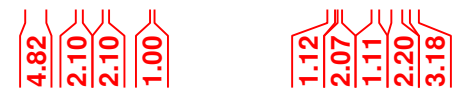

ljx-3-99

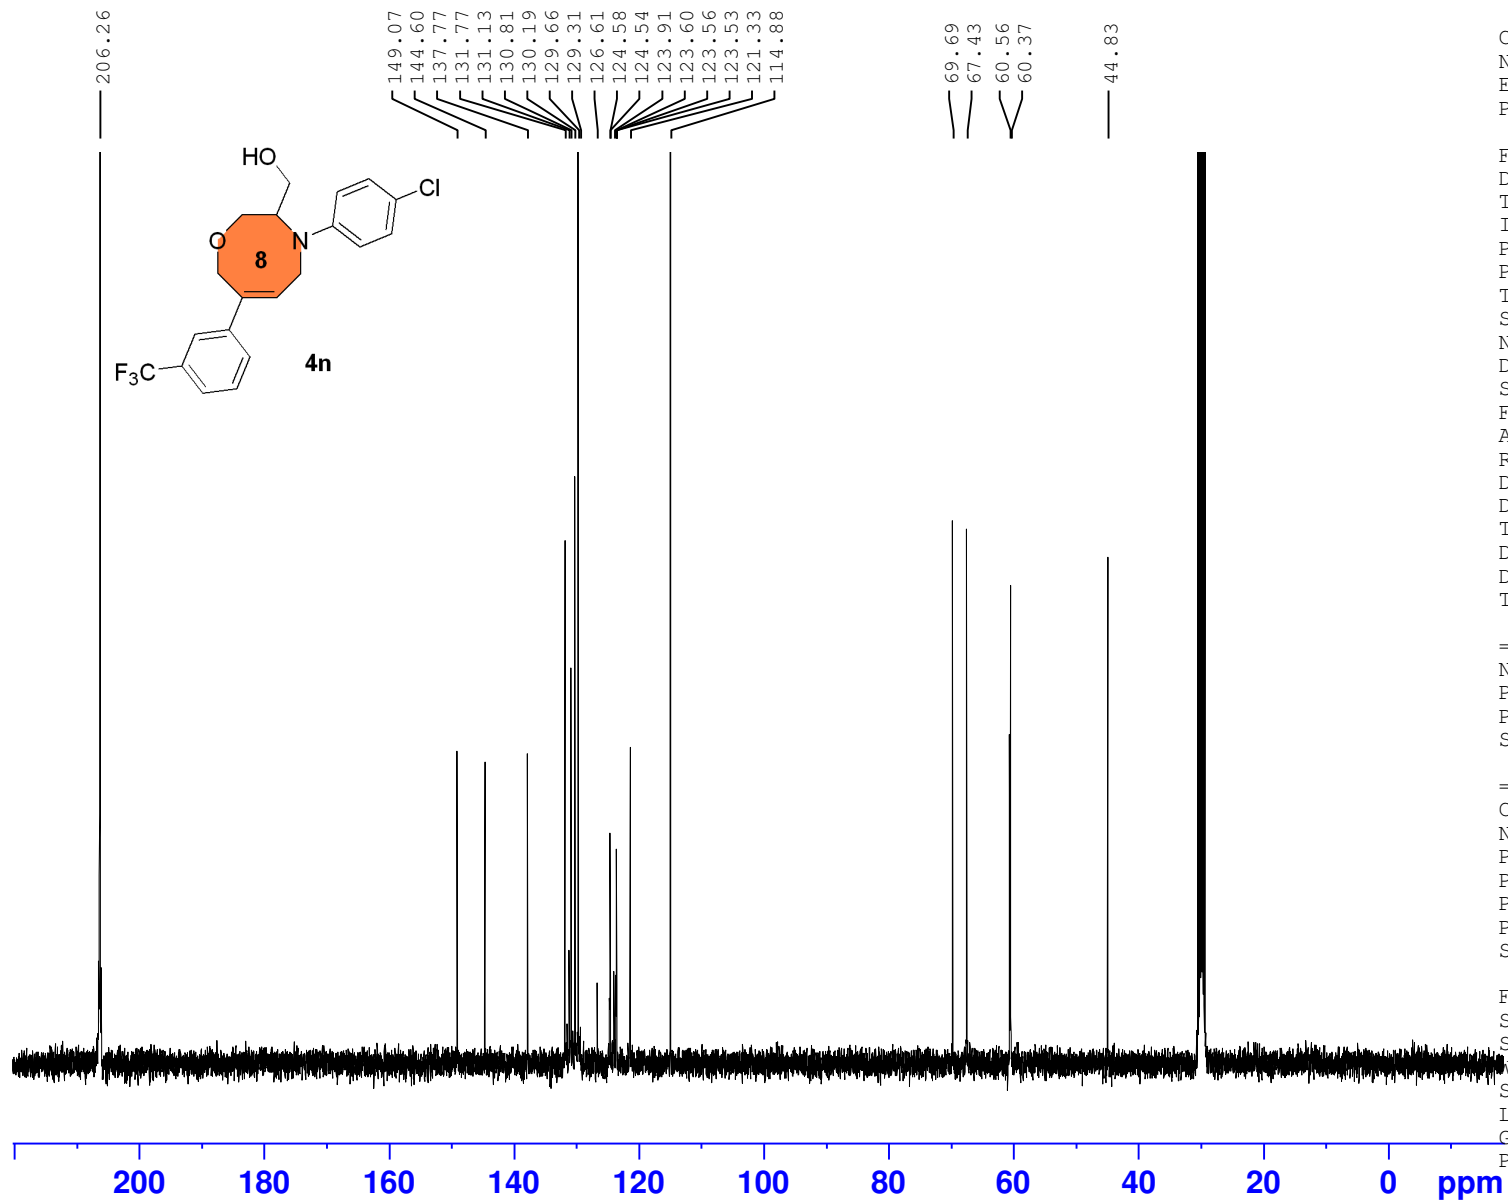

Current Data Parameters  
NAME 2023-5-27-400  
EXPNO 29  
PROCNO 1

F2 - Acquisition Parameters  
Date\_ 20230527  
Time 2.12  
INSTRUM spect  
PROBHD 5 mm PABBO BB-  
PULPROG zgpg30  
TD 65536  
SOLVENT Acetone  
NS 400  
DS 4  
SWH 24038.461 Hz  
FIDRES 0.366798 Hz  
AQ 1.3631488 sec  
RG 193.13  
DW 20.800 usec  
DE 6.50 usec  
TE 293.1 K  
D1 2.00000000 sec  
D11 0.03000000 sec  
TD0 1

==== CHANNEL f1 =====  
NUC1 13C  
P1 12.00 usec  
PLW1 53.00000000 W  
SFO1 100.6379178 MHz

==== CHANNEL f2 =====  
CPDPRG[2] waltz16  
NUC2 1H  
PCPD2 90.00 usec  
PLW2 14.00000000 W  
PLW12 0.37246999 W  
PLW13 0.30170000 W  
SFO2 400.1916008 MHz

F2 - Processing parameters  
SI 32768  
SF 100.6277713 MHz  
WDW EM  
SSB 0  
LB 1.00 Hz  
GB 0  
PC 1.40



# <sup>19</sup>F NMR

LJX-3-99

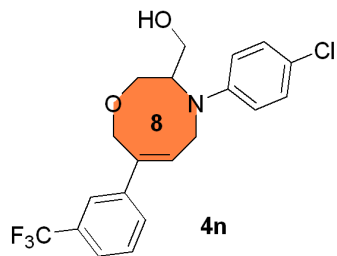

-62.60

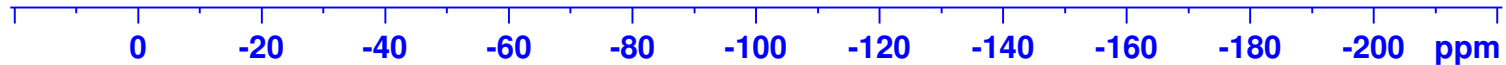

Current Data Parameters  
NAME 0927HH  
EXPNO 4  
PROCNO 1

F2 - Acquisition Parameters  
Date\_ 20230927  
Time 16.10 h  
INSTRUM Avance  
PROBHD z116098\_0833 (  
PULPROG zgig  
TD 131072  
SOLVENT CDC13  
NS 16  
DS 4  
SWH 90909.094 Hz  
FIDRES 1.387163 Hz  
AQ 0.7208960 sec  
RG 101  
DW 5.500 usec  
DE 6.50 usec  
TE 294.5 K  
D1 1.00000000 sec  
D11 0.03000000 sec  
TD0 1  
SFO1 376.4607164 MHz  
NUC1 19F  
P1 18.00 usec  
PLW1 16.73100090 W  
SFO2 400.1316005 MHz  
NUC2 1H  
CPDPRG[2] waltz16  
PCPD2 90.00 usec  
PLW2 20.73200035 W  
PLW12 0.25595000 W

F2 - Processing parameters  
SI 65536  
SF 376.4983662 MHz  
WDW EM  
SSB 0  
LB 0.30 Hz  
GB 0  
PC 1.00

LJX-3-49

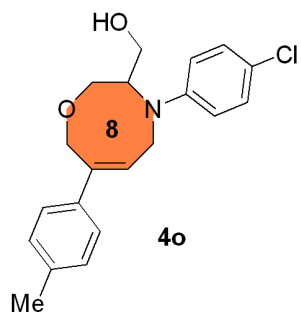

7.222  
7.202  
7.158  
7.153  
7.141  
7.135  
7.112  
6.899  
6.884  
6.872  
6.867  
6.858  
6.286  
6.271  
6.256  
4.638  
4.622  
4.594  
4.585  
4.547  
4.461  
4.423  
4.220  
4.208  
4.189  
4.177  
3.923  
3.909  
3.892  
3.880  
3.865  
3.776  
3.763  
3.757  
3.732  
3.725  
2.286  
2.061  
2.056  
2.050  
2.045  
2.039

Current Data Parameters  
NAME 230407-400M  
EXPNO 24  
PROCNO 1

F2 - Acquisition Parameters  
Date\_ 20230408  
Time 6.55  
INSTRUM spect  
PROBHD 5 mm PABBO BB-  
PULPROG zg30  
TD 65536  
SOLVENT Acetone  
NS 8  
DS 2  
SWH 8223.685 Hz  
FIDRES 0.125483 Hz  
AQ 3.9845889 sec  
RG 61.19  
DW 60.800 usec  
DE 6.50 usec  
TE 289.3 K  
D1 1.00000000 sec  
TD0 1

==== CHANNEL f1 =====  
NUC1 1H  
P1 14.68 usec  
PLW1 14.00000000 W  
SFO1 400.1924713 MHz

F2 - Processing parameters  
SI 65536  
SF 400.1900121 MHz  
WDW EM  
SSB 0  
LB 0.30 Hz  
GB 0  
PC 1.00

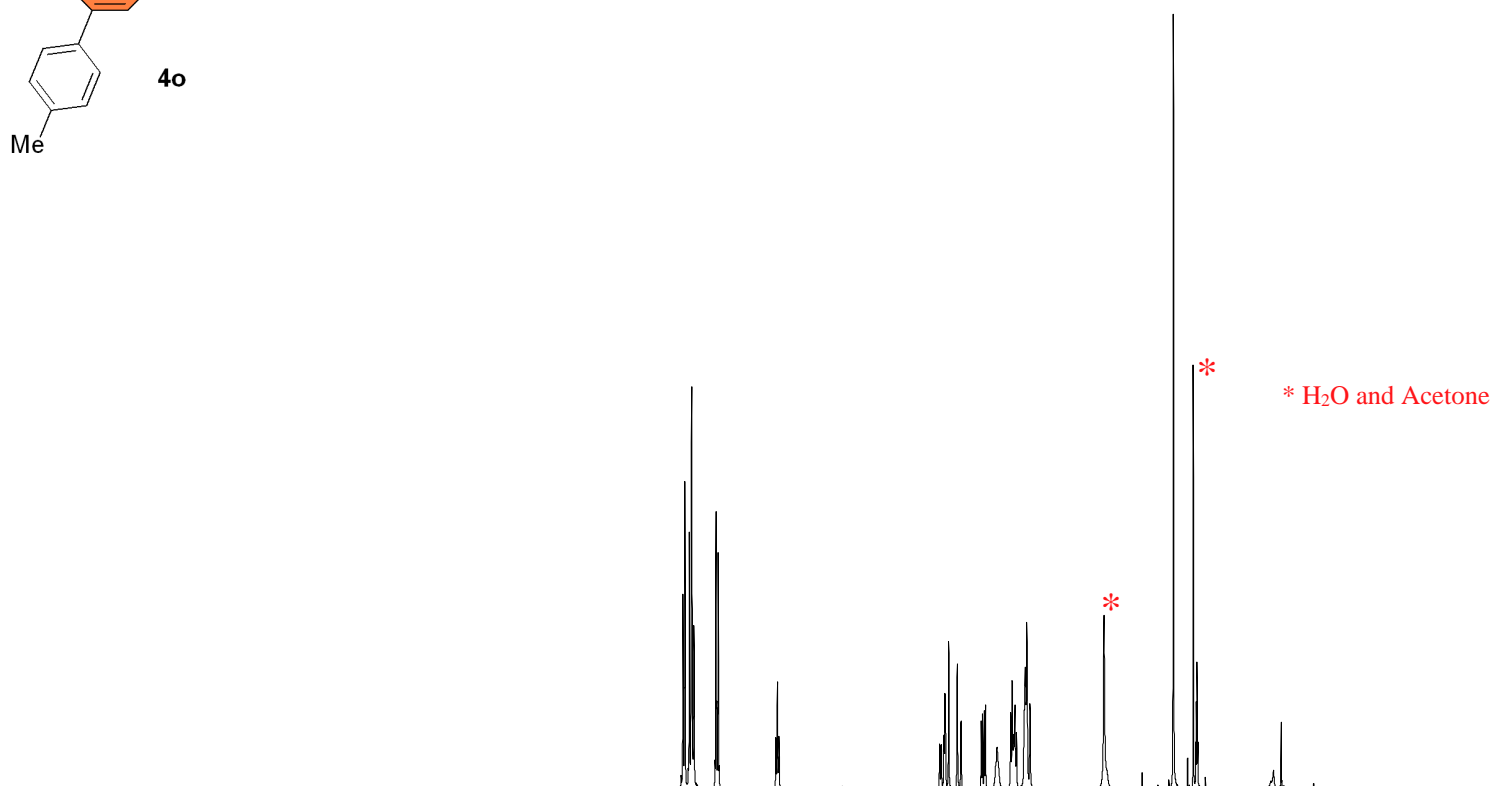

13 12 11 10 9 8 7 6 5 4 3 2 1 0 ppm

2.06  
3.99  
2.00  
1.00  
3.07  
1.02  
2.08  
3.05  
3.03

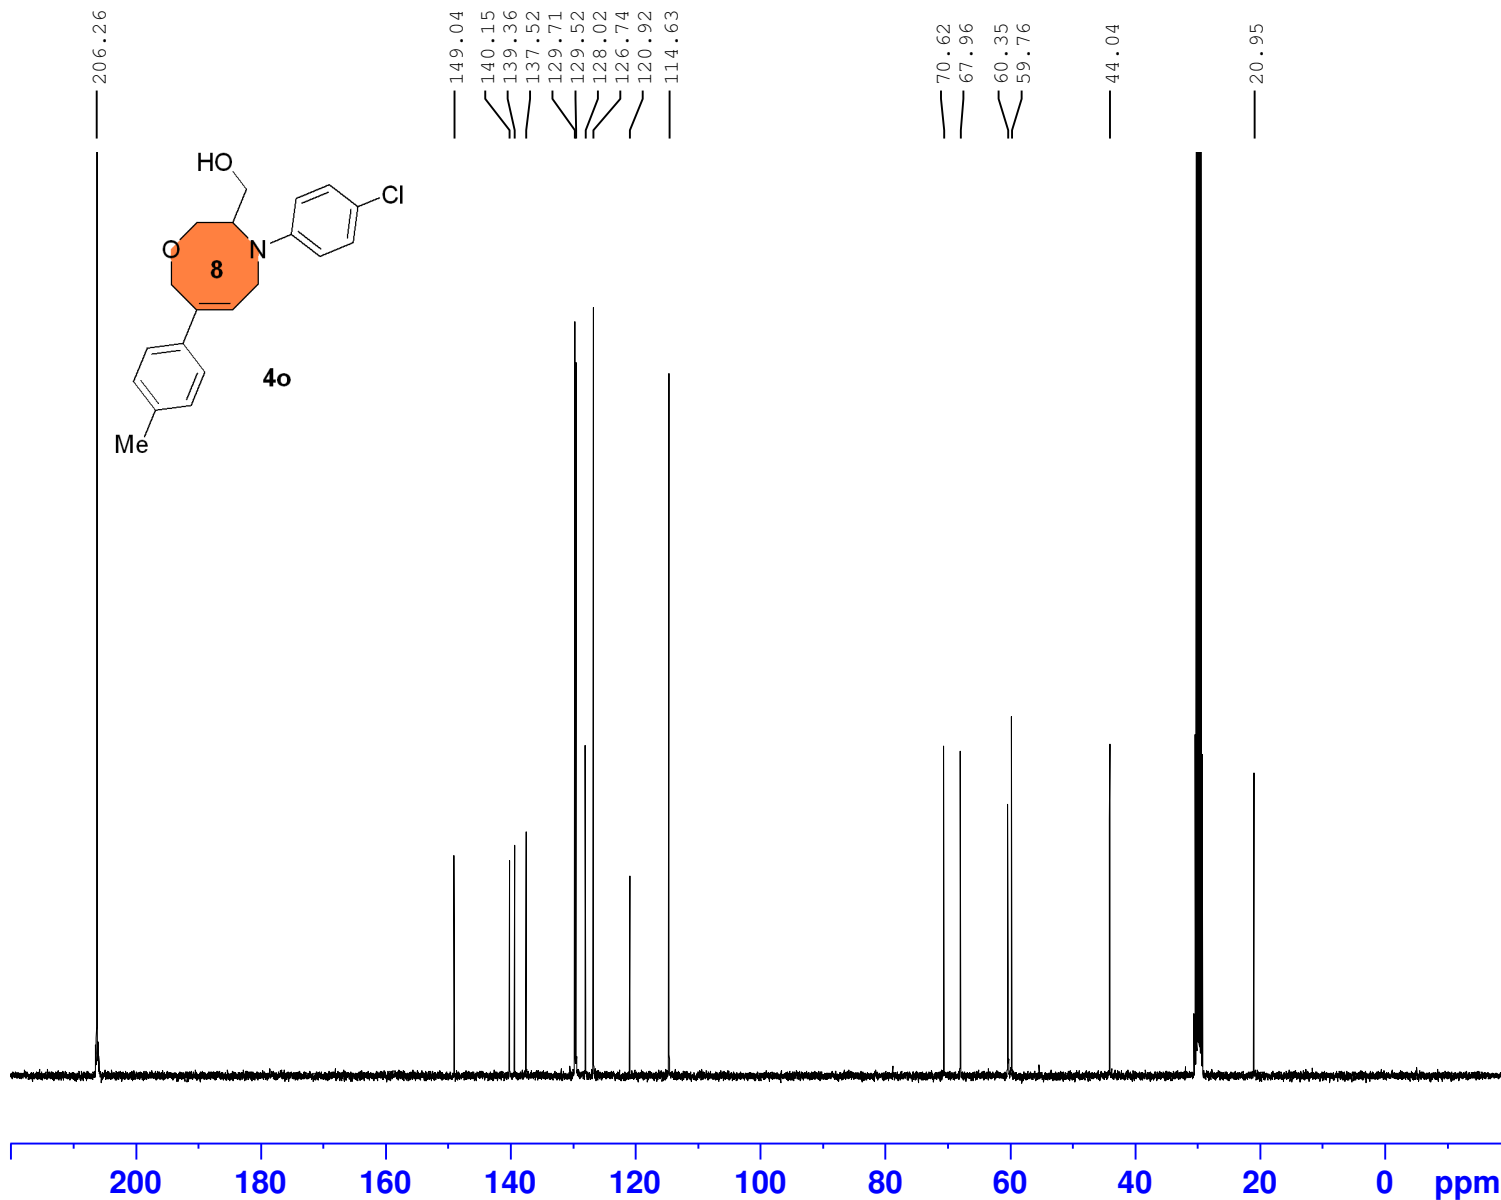

Current Data Parameters  
 NAME 230407-400M  
 EXPNO 25  
 PROCNO 1

F2 - Acquisition Parameters  
 Date\_ 20230408  
 Time 7.25  
 INSTRUM spect  
 PROBHD 5 mm PABBO BB-  
 PULPROG zgpg30  
 TD 65536  
 SOLVENT Acetone  
 NS 500  
 DS 4  
 SWH 24038.461 Hz  
 FIDRES 0.366798 Hz  
 AQ 1.3631488 sec  
 RG 193.13  
 DW 20.800 usec  
 DE 6.50 usec  
 TE 290.3 K  
 D1 2.00000000 sec  
 D11 0.03000000 sec  
 TD0 1

==== CHANNEL f1 =====  
 NUC1 13C  
 P1 12.00 usec  
 PLW1 53.00000000 W  
 SFO1 100.6379178 MHz

==== CHANNEL f2 =====  
 CPDPRG[2] waltz16  
 NUC2 1H  
 PCPD2 90.00 usec  
 PLW2 14.00000000 W  
 PLW12 0.37246999 W  
 PLW13 0.30170000 W  
 SFO2 400.1916008 MHz

F2 - Processing parameters  
 SI 32768  
 SF 100.6277810 MHz  
 WDW EM  
 SSB 0  
 LB 1.00 Hz  
 GB 0  
 PC 1.40

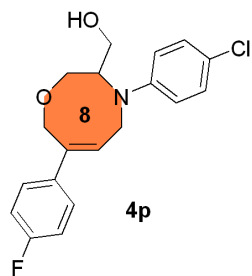

7.391  
7.383  
7.378  
7.370  
7.361  
7.353  
7.348  
7.340  
7.170  
7.161  
7.156  
7.144  
7.139  
7.130  
7.111  
7.103  
7.097  
7.086  
7.081  
7.075  
7.064  
7.059  
7.051  
6.902  
6.893  
6.887  
6.875  
6.870  
6.861  
6.308  
6.293  
6.279  
4.638  
4.623  
4.594  
4.579  
4.571  
4.533  
4.472  
4.434  
4.218  
4.205  
4.187  
4.174  
3.948  
3.934  
3.924  
3.919  
3.905  
3.891  
3.789  
3.780  
3.774  
3.758  
3.749  
3.743  
3.743  
2.061  
2.056  
2.050

Current Data Parameters  
 NAME 230407-400M  
 EXPNO 28  
 PROCNO 1

F2 - Acquisition Parameters  
 Date\_ 20230408  
 Time 8.02  
 INSTRUM spect  
 PROBHD 5 mm PABBO BB-  
 PULPROG zg30  
 TD 65536  
 SOLVENT Acetone  
 NS 8  
 DS 2  
 SWH 8223.685 Hz  
 FIDRES 0.125483 Hz  
 AQ 3.9845889 sec  
 RG 68.24  
 DW 60.800 usec  
 DE 6.50 usec  
 TE 289.4 K  
 D1 1.00000000 sec  
 TD0 1

==== CHANNEL f1 =====  
 NUC1 1H  
 P1 14.68 usec  
 PLW1 14.00000000 W  
 SFO1 400.1924713 MHz

F2 - Processing parameters  
 SI 65536  
 SF 400.1900121 MHz  
 WDW EM  
 SSB 0  
 LB 0.30 Hz  
 GB 0  
 PC 1.00

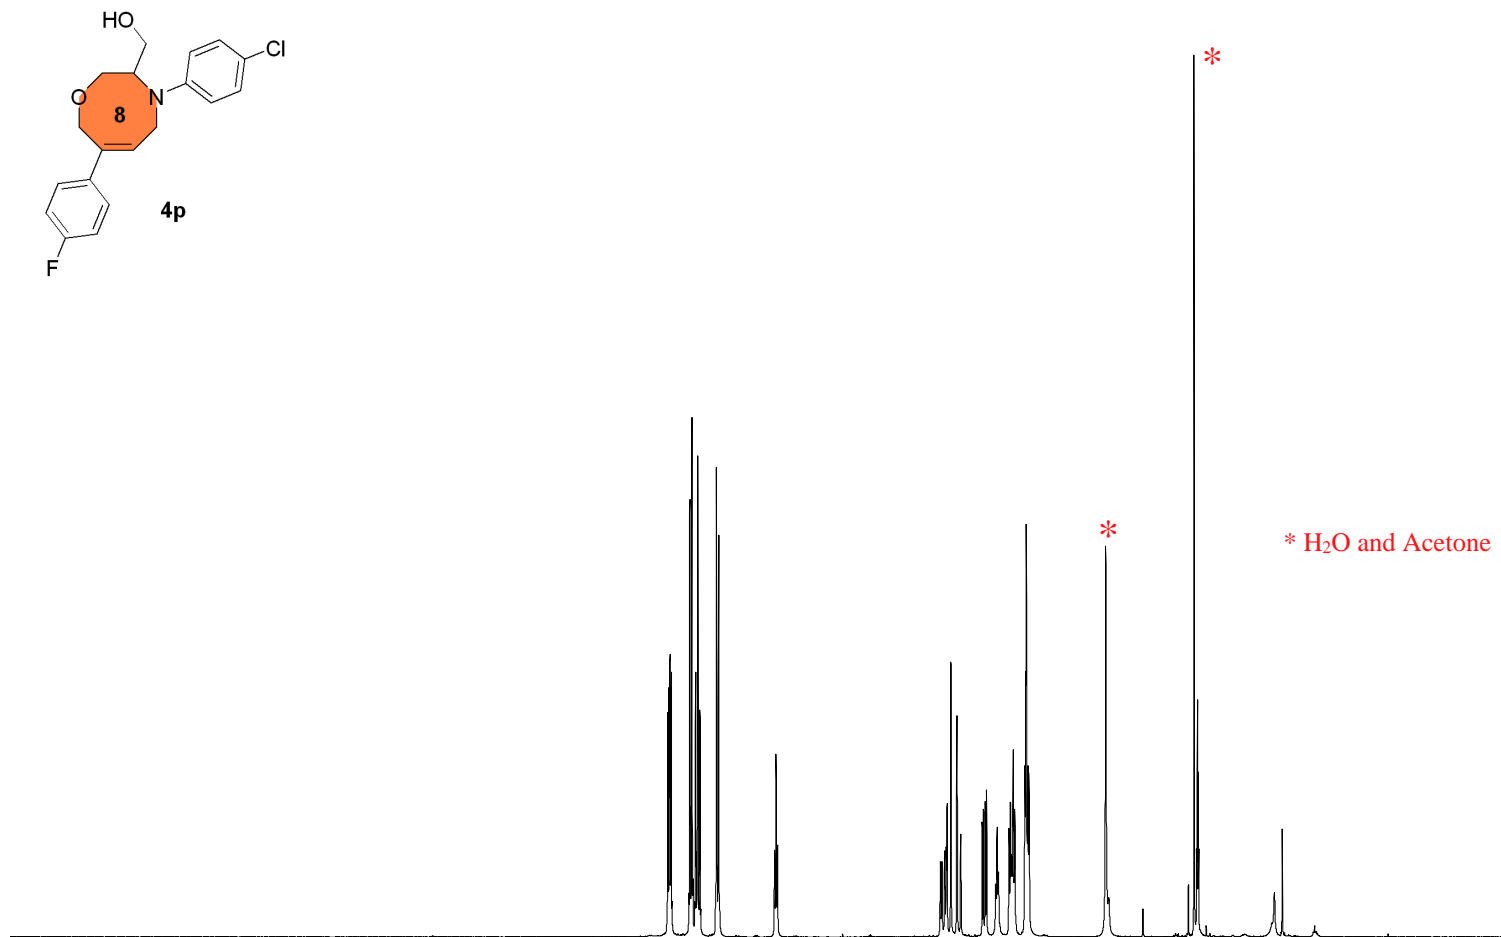

\* H<sub>2</sub>O and Acetone

13 12 11 10 9 8 7 6 5 4 3 2 1 0 ppm

2.03  
4.06  
2.02  
1.00  
3.09  
1.01  
2.04  
3.08

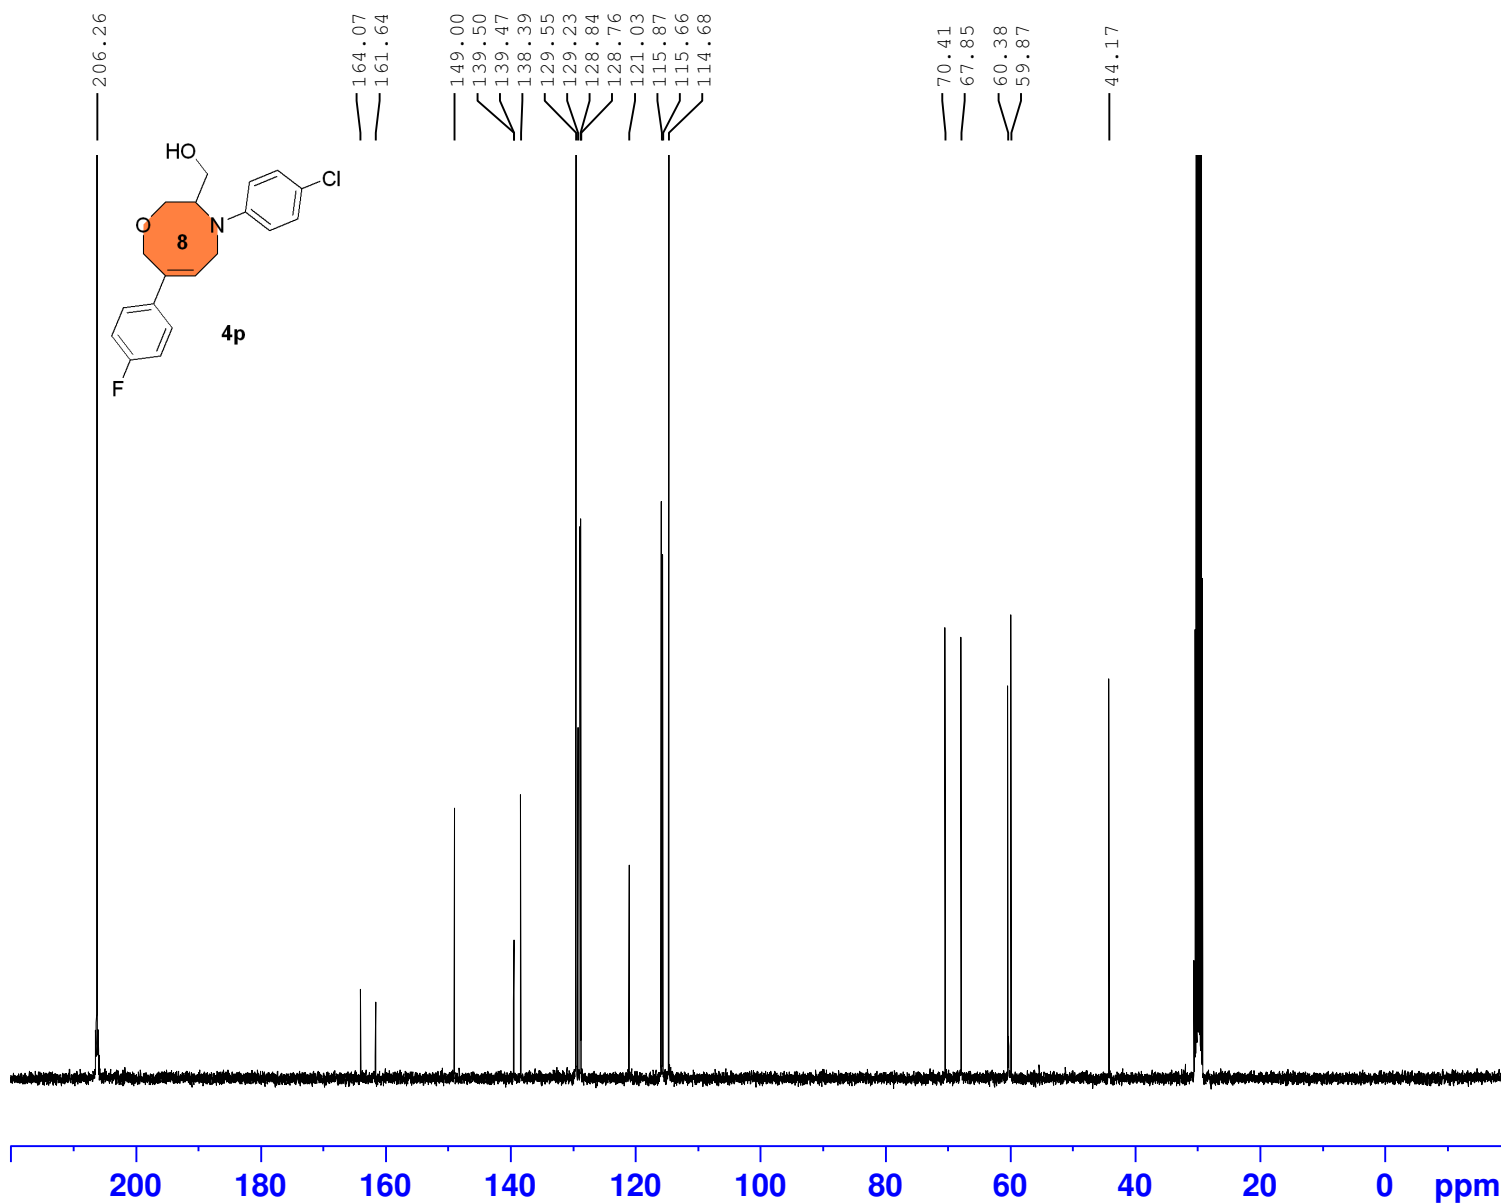

Current Data Parameters  
 NAME 230407-400M  
 EXPNO 29  
 PROCNO 1

F2 - Acquisition Parameters  
 Date\_ 20230408  
 Time 8.32  
 INSTRUM spect  
 PROBHD 5 mm PABBO BB-  
 PULPROG zgpg30  
 TD 65536  
 SOLVENT Acetone  
 NS 500  
 DS 4  
 SWH 24038.461 Hz  
 FIDRES 0.366798 Hz  
 AQ 1.3631488 sec  
 RG 193.13  
 DW 20.800 usec  
 DE 6.50 usec  
 TE 290.1 K  
 D1 2.00000000 sec  
 D11 0.03000000 sec  
 TD0 1

==== CHANNEL f1 =====  
 NUC1 13C  
 P1 12.00 usec  
 PLW1 53.00000000 W  
 SFO1 100.6379178 MHz

==== CHANNEL f2 =====  
 CPDPRG[2] waltz16  
 NUC2 1H  
 PCPD2 90.00 usec  
 PLW2 14.00000000 W  
 PLW12 0.37246999 W  
 PLW13 0.30170000 W  
 SFO2 400.1916008 MHz

F2 - Processing parameters  
 SI 32768  
 SF 100.6277800 MHz  
 WDW EM  
 SSB 0  
 LB 1.00 Hz  
 GB 0  
 PC 1.40

# <sup>19</sup>F NMR

ljx-3-51

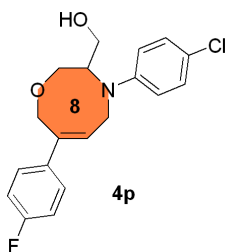

Current Data Parameters  
NAME 20230725-300M  
EXPNO 406  
PROCNO 1

F2 - Acquisition Parameters  
Date\_ 20230725  
Time 11.57  
INSTRUM spect  
PROBHD 5 mm PABBO BB-  
PULPROG zgfhigqn.2  
TD 131072  
SOLVENT CDCl3  
NS 20  
DS 4  
SWH 66964.289 Hz  
FIDRES 0.510897 Hz  
AQ 0.9786710 sec  
RG 203  
DW 7.467 usec  
DE 6.50 usec  
TE 298.3 K  
D1 1.00000000 sec  
D11 0.03000000 sec  
D12 0.00002000 sec  
TD0 1

==== CHANNEL f1 =====  
SFO1 282.3761148 MHz  
NUC1 19F  
P1 14.50 usec  
PLW1 10.39999962 W

==== CHANNEL f2 =====  
SFO2 300.1312005 MHz  
NUC2 1H  
CPDPRG[2] waltz16  
PCPD2 90.00 usec  
PLW2 14.00000000 W  
PLW12 0.17284000 W

F2 - Processing parameters  
SI 65536  
SF 282.4043552 MHz  
WDW EM  
SSB 0  
LB 0.30 Hz  
GB 0  
PC 1.00

-114.684

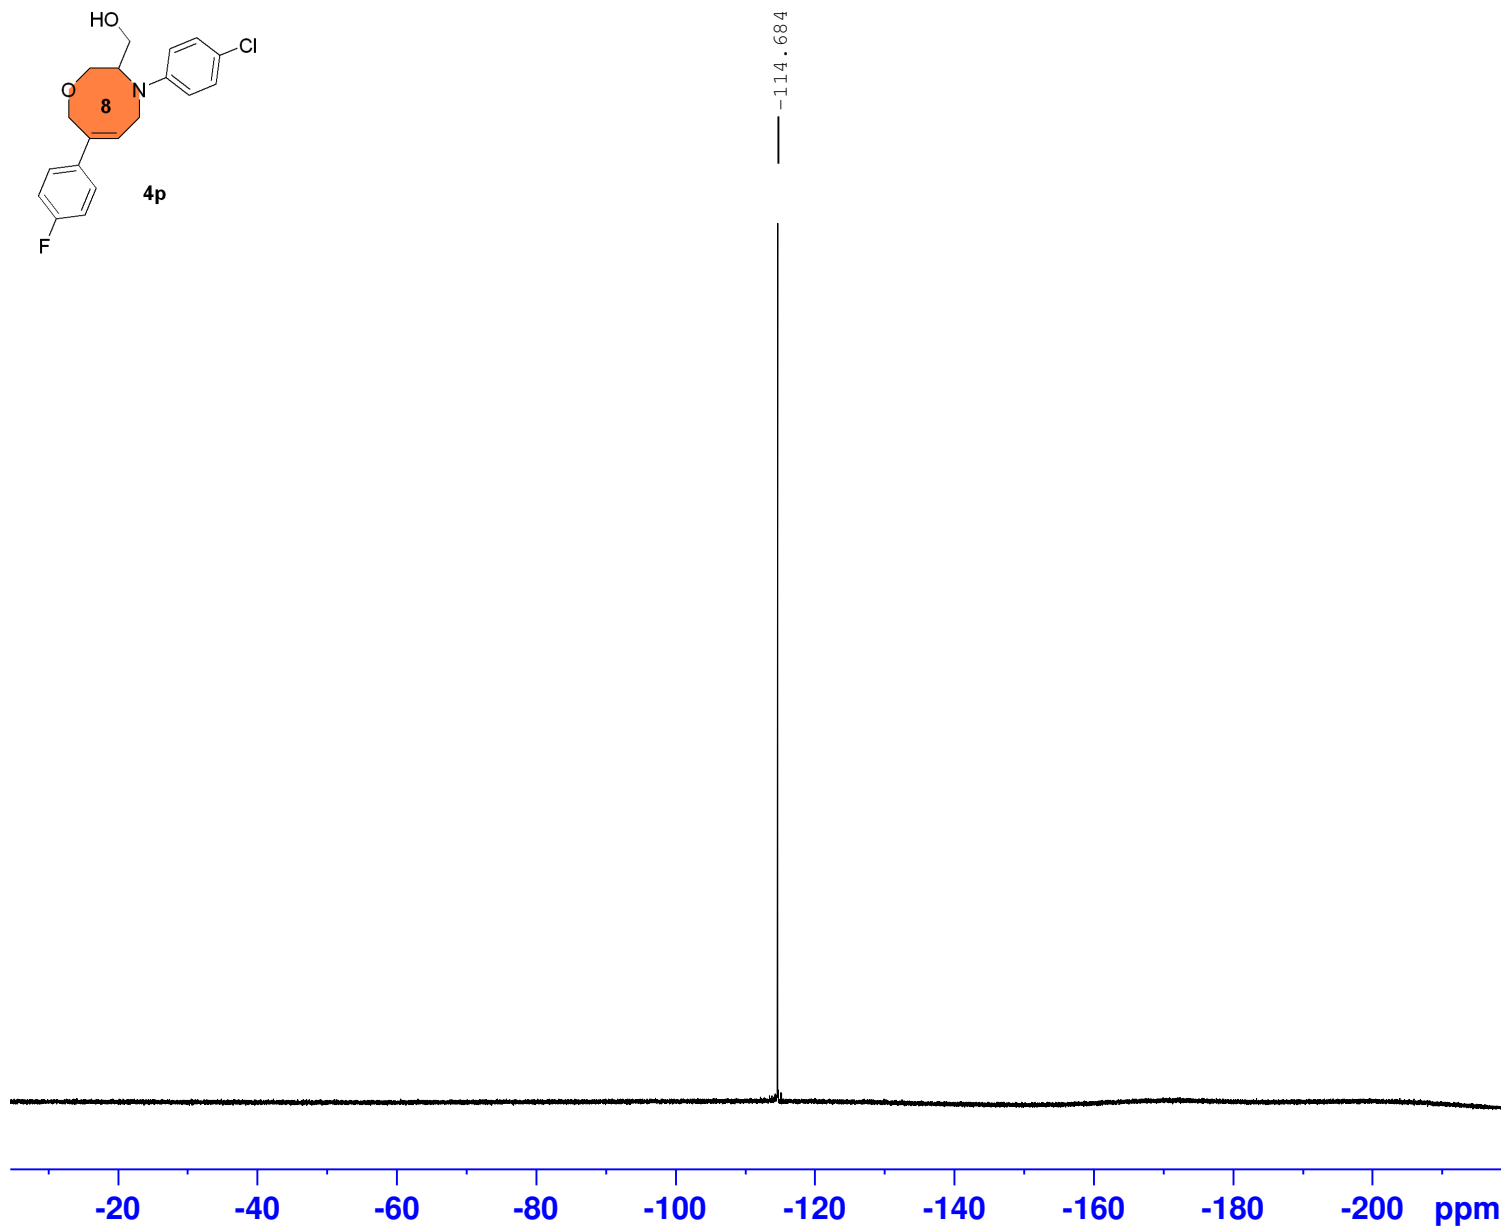

LJX-3-50

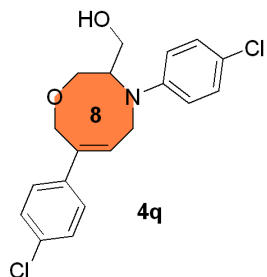

7.344  
7.162  
7.157  
7.145  
7.139  
7.139  
6.890  
6.885  
6.873  
6.867  
6.357  
6.342  
6.328  
4.634  
4.620  
4.590  
4.576  
4.556  
4.518  
4.481  
4.443  
4.203  
4.189  
4.172  
4.158  
3.969  
3.955  
3.926  
3.912  
3.784  
3.778  
3.769  
3.753  
3.747  
3.747  
2.086  
2.061  
2.055  
2.050  
2.044  
2.039

Current Data Parameters  
NAME 230407-400M  
EXPNO 26  
PROCNO 1

F2 - Acquisition Parameters  
Date\_ 20230408  
Time 7.28  
INSTRUM spect  
PROBHD 5 mm PABBO BB-  
PULPROG zg30  
TD 65536  
SOLVENT Acetone  
NS 8  
DS 2  
SWH 8223.685 Hz  
FIDRES 0.125483 Hz  
AQ 3.9845889 sec  
RG 75.43  
DW 60.800 usec  
DE 6.50 usec  
TE 289.6 K  
D1 1.00000000 sec  
TD0 1

==== CHANNEL f1 =====  
NUC1 1H  
P1 14.68 usec  
PLW1 14.00000000 W  
SFO1 400.1924713 MHz

F2 - Processing parameters  
SI 65536  
SF 400.1900123 MHz  
WDW EM  
SSB 0  
LB 0.30 Hz  
GB 0  
PC 1.00

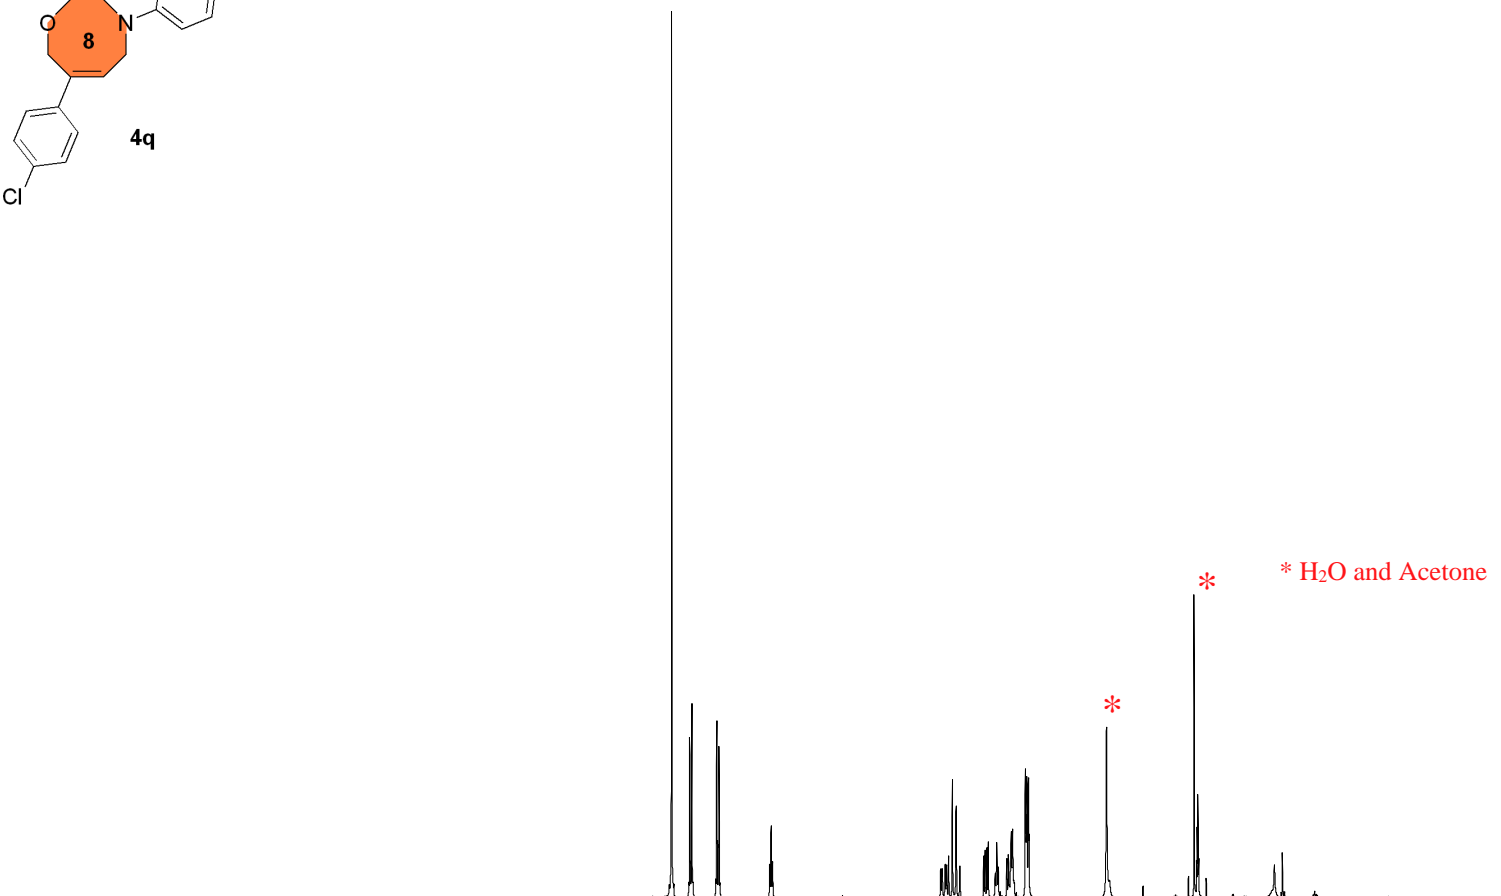

13 12 11 10 9 8 7 6 5 4 3 2 1 0 ppm

4.06  
1.98  
2.02  
1.00  
3.08  
1.03  
2.06  
3.08

LJX-3-50

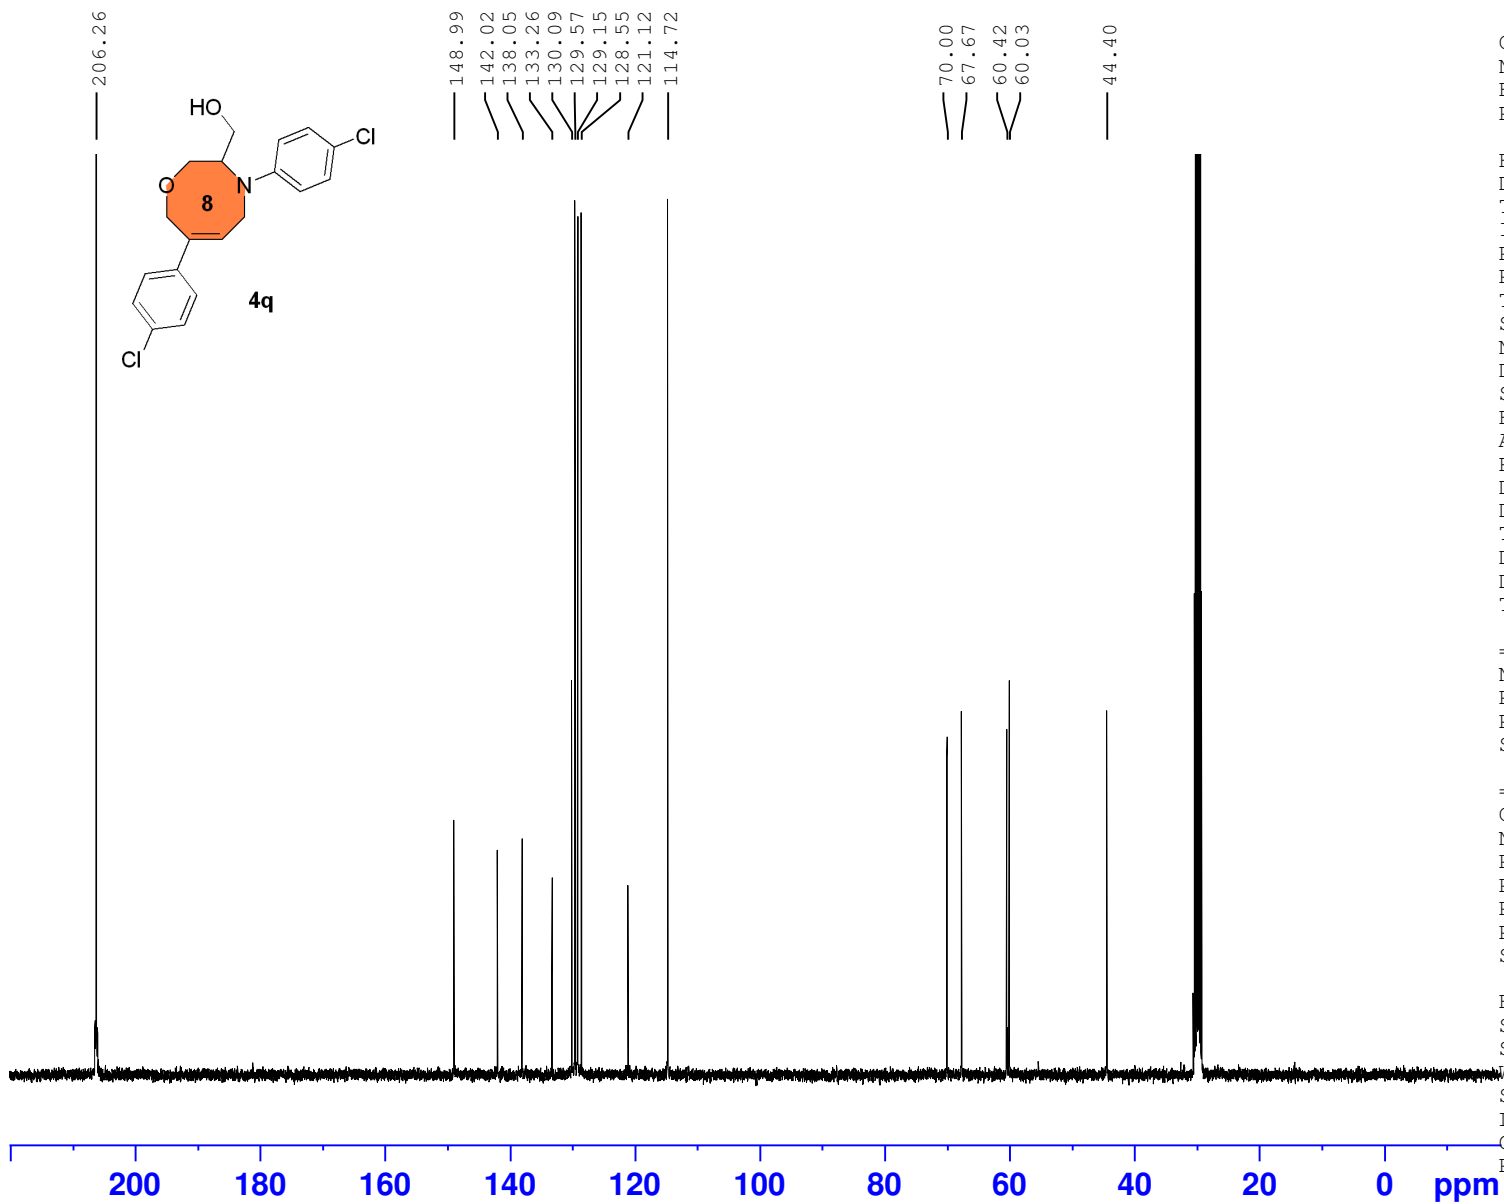

Current Data Parameters  
NAME 230407-400M  
EXPNO 27  
PROCNO 1

F2 - Acquisition Parameters  
Date\_ 20230408  
Time 7.58  
INSTRUM spect  
PROBHD 5 mm PABBO BB-  
PULPROG zgpg30  
TD 65536  
SOLVENT Acetone  
NS 500  
DS 4  
SWH 24038.461 Hz  
FIDRES 0.366798 Hz  
AQ 1.3631488 sec  
RG 193.13  
DW 20.800 usec  
DE 6.50 usec  
TE 290.1 K  
D1 2.00000000 sec  
D11 0.03000000 sec  
TD0 1

==== CHANNEL f1 =====  
NUC1 13C  
P1 12.00 usec  
PLW1 53.00000000 W  
SFO1 100.6379178 MHz

==== CHANNEL f2 =====  
CPDPRG[2] waltz16  
NUC2 1H  
PCPD2 90.00 usec  
PLW2 14.00000000 W  
PLW12 0.37246999 W  
PLW13 0.30170000 W  
SFO2 400.1916008 MHz

F2 - Processing parameters  
SI 32768  
SF 100.6277786 MHz  
WDW EM  
SSB 0  
LB 1.00 Hz  
GB 0  
PC 1.40



LJX-3-68

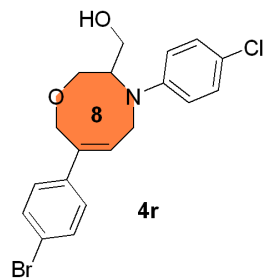

7.503  
7.482  
7.304  
7.283  
7.163  
7.140  
6.891  
6.868  
6.368  
6.354  
6.339  
4.632  
4.617  
4.588  
4.573  
4.553  
4.515  
4.483  
4.445  
4.199  
4.186  
4.168  
4.154  
3.970  
3.956  
3.927  
3.912  
3.782  
3.766  
3.749  
2.061  
2.055  
2.050  
2.044  
2.039

Current Data Parameters  
NAME 2023-5-20-400  
EXPNO 25  
PROCNO 1

F2 - Acquisition Parameters  
Date\_ 20230519  
Time 23.34  
INSTRUM spect  
PROBHD 5 mm PABBO BB-  
PULPROG zg30  
TD 65536  
SOLVENT Acetone  
NS 10  
DS 2  
SWH 8223.685 Hz  
FIDRES 0.125483 Hz  
AQ 3.9845889 sec  
RG 113.67  
DW 60.800 usec  
DE 6.50 usec  
TE 287.9 K  
D1 1.00000000 sec  
TD0 1

==== CHANNEL f1 =====  
NUC1 1H  
P1 14.68 usec  
PLW1 14.00000000 W  
SFO1 400.1924713 MHz

F2 - Processing parameters  
SI 65536  
SF 400.1900122 MHz  
WDW EM  
SSB 0  
LB 0.30 Hz  
GB 0  
PC 1.00

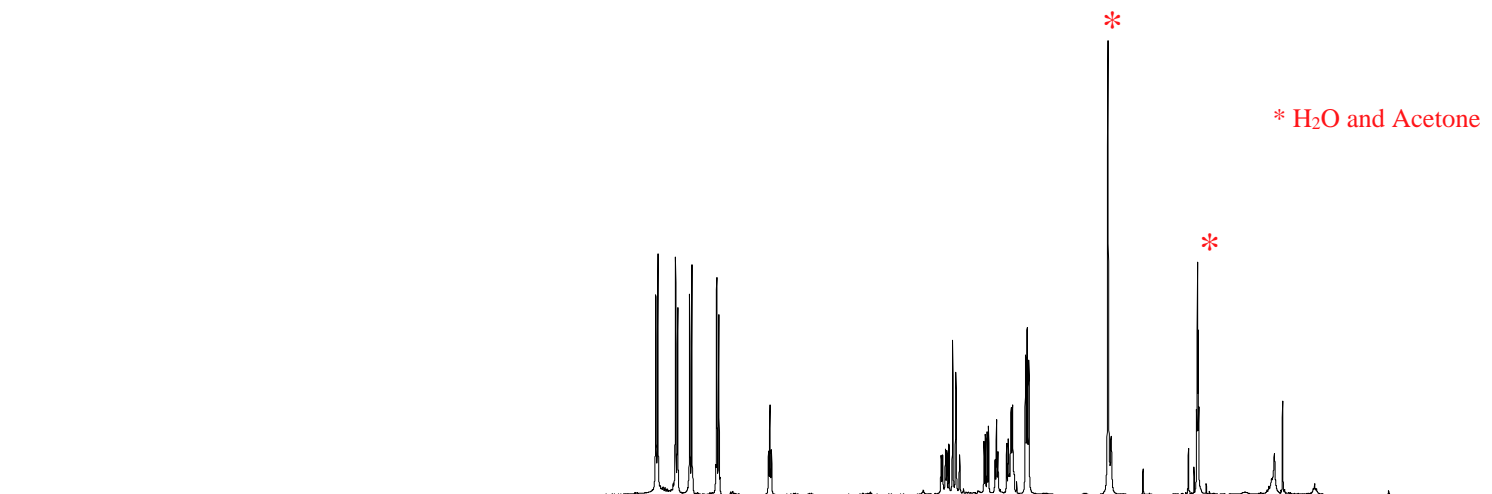

13 12 11 10 9 8 7 6 5 4 3 2 1 0 ppm

2.10  
2.09  
2.02  
2.00  
1.00  
1.08  
2.04  
1.09  
2.02  
3.06

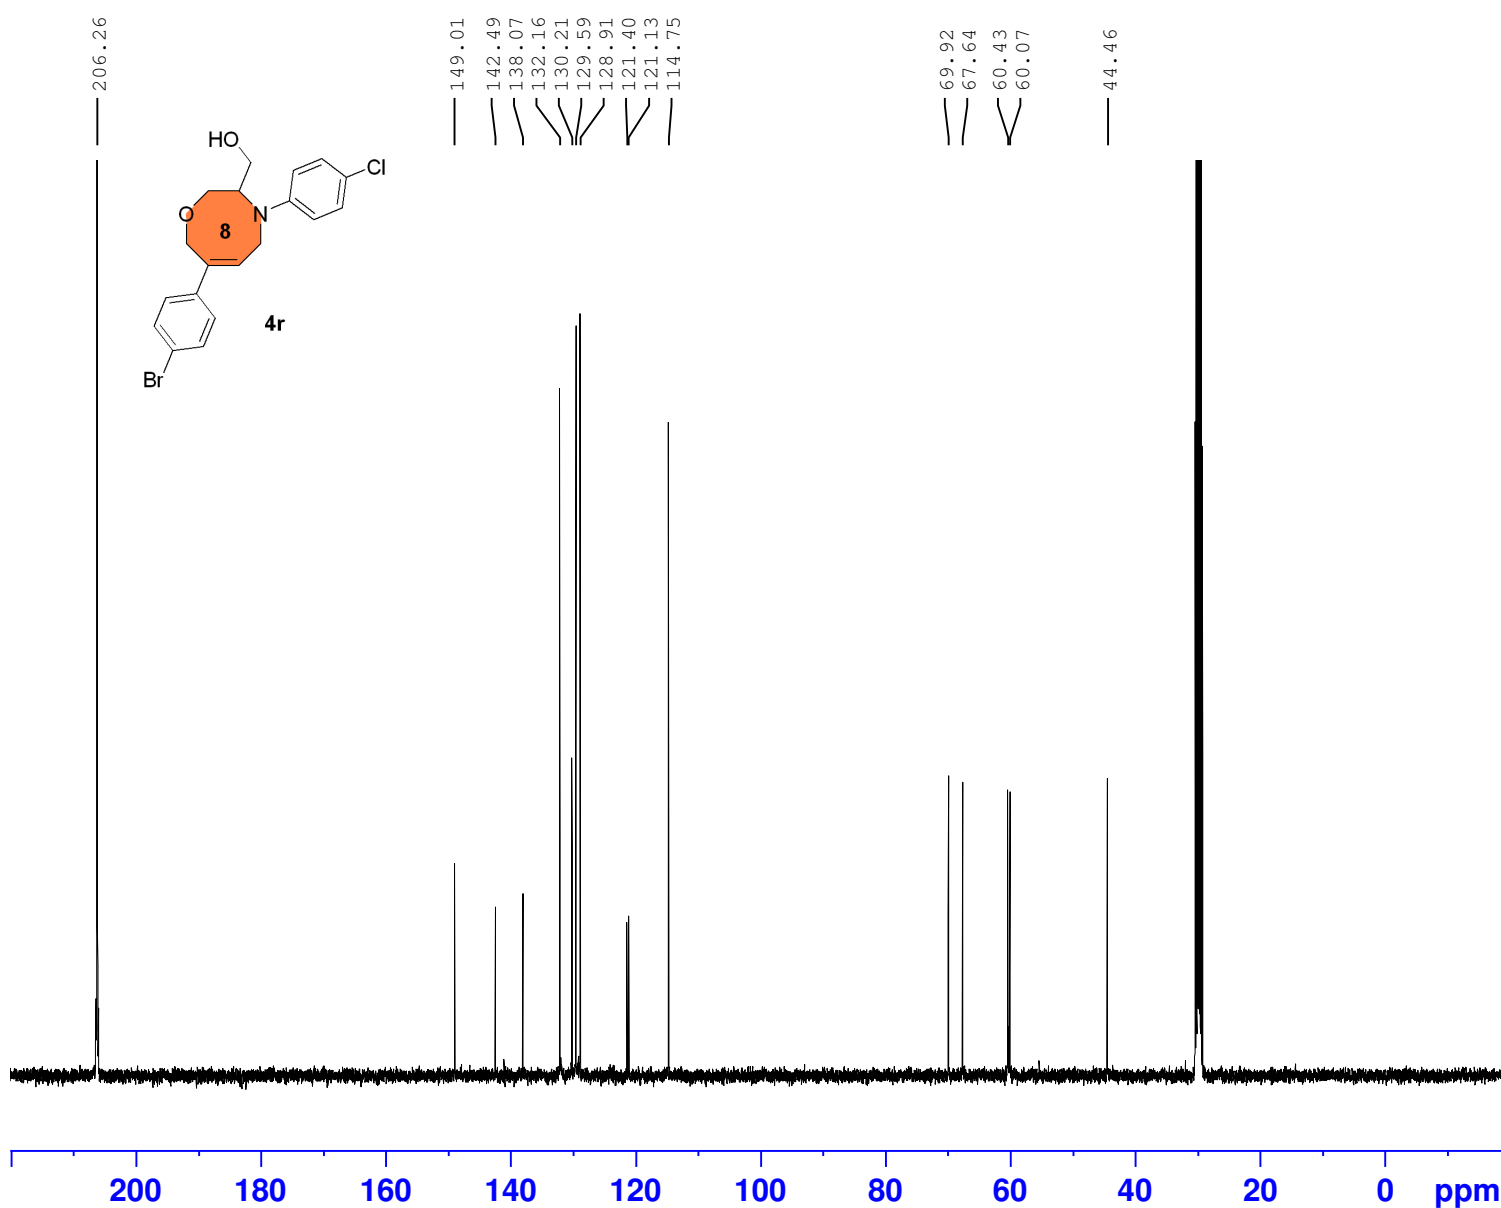

Current Data Parameters  
 NAME 2023-5-20-400  
 EXPNO 26  
 PROCNO 1

F2 - Acquisition Parameters  
 Date\_ 20230520  
 Time 0.32  
 INSTRUM spect  
 PROBHD 5 mm PABBO BB-  
 PULPROG zgpg30  
 TD 65536  
 SOLVENT Acetone  
 NS 1000  
 DS 4  
 SWH 24038.461 Hz  
 FIDRES 0.366798 Hz  
 AQ 1.3631488 sec  
 RG 193.13  
 DW 20.800 usec  
 DE 6.50 usec  
 TE 288.9 K  
 D1 2.00000000 sec  
 D11 0.03000000 sec  
 TD0 1

==== CHANNEL f1 =====  
 NUC1 13C  
 P1 12.00 usec  
 PLW1 53.00000000 W  
 SFO1 100.6379178 MHz

==== CHANNEL f2 =====  
 CPDPRG[2] waltz16  
 NUC2 1H  
 PCPD2 90.00 usec  
 PLW2 14.00000000 W  
 PLW12 0.37246999 W  
 PLW13 0.30170000 W  
 SFO2 400.1916008 MHz

F2 - Processing parameters  
 SI 32768  
 SF 100.6277763 MHz  
 WDW EM  
 SSB 0  
 LB 1.00 Hz  
 GB 0  
 PC 1.40

ljx-5-16



Current Data Parameters  
NAME 20231028-400M  
EXPNO 2  
PROCNO 1

F2 - Acquisition Parameters  
Date\_ 20231027  
Time 21.46  
INSTRUM spect  
PROBHD 5 mm PADUL 13C  
PULPROG zg30  
TD 65536  
SOLVENT Acetone  
NS 8  
DS 0  
SWH 8223.685 Hz  
FIDRES 0.125483 Hz  
AQ 3.9845889 sec  
RG 61.19  
DW 60.800 usec  
DE 6.50 usec  
TE 292.3 K  
D1 1.00000000 sec  
TD0 1

==== CHANNEL f1 =====  
NUC1 1H  
P1 9.90 usec  
PLW1 23.00000000 W  
SFO1 400.1924713 MHz

F2 - Processing parameters  
SI 65536  
SF 400.1900112 MHz  
WDW EM  
SSB 0  
LB 0.30 Hz  
GB 0  
PC 1.00

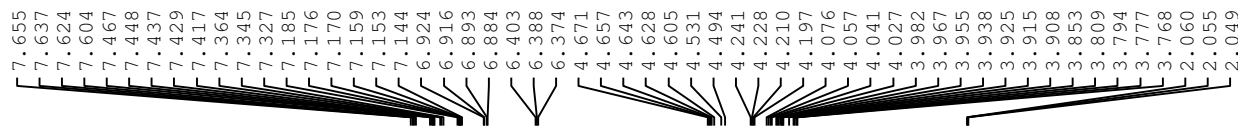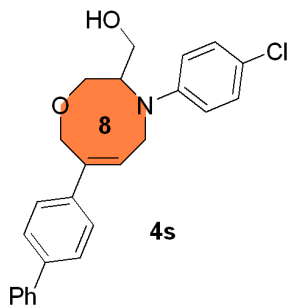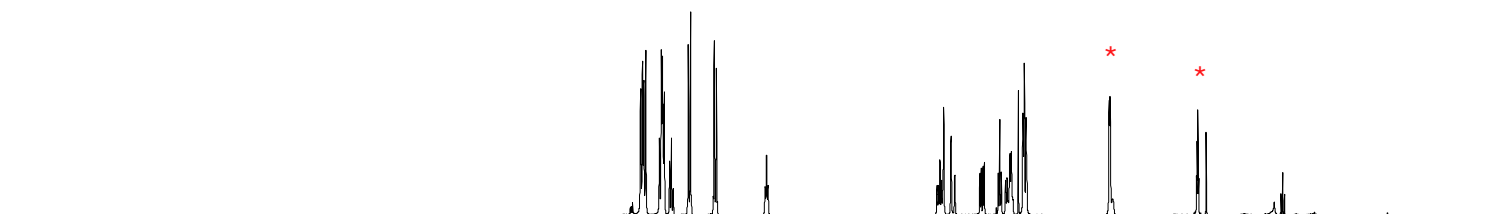

\* H<sub>2</sub>O and Acetone

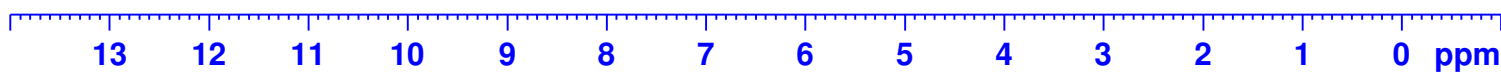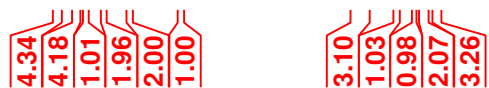

ljx-3-98

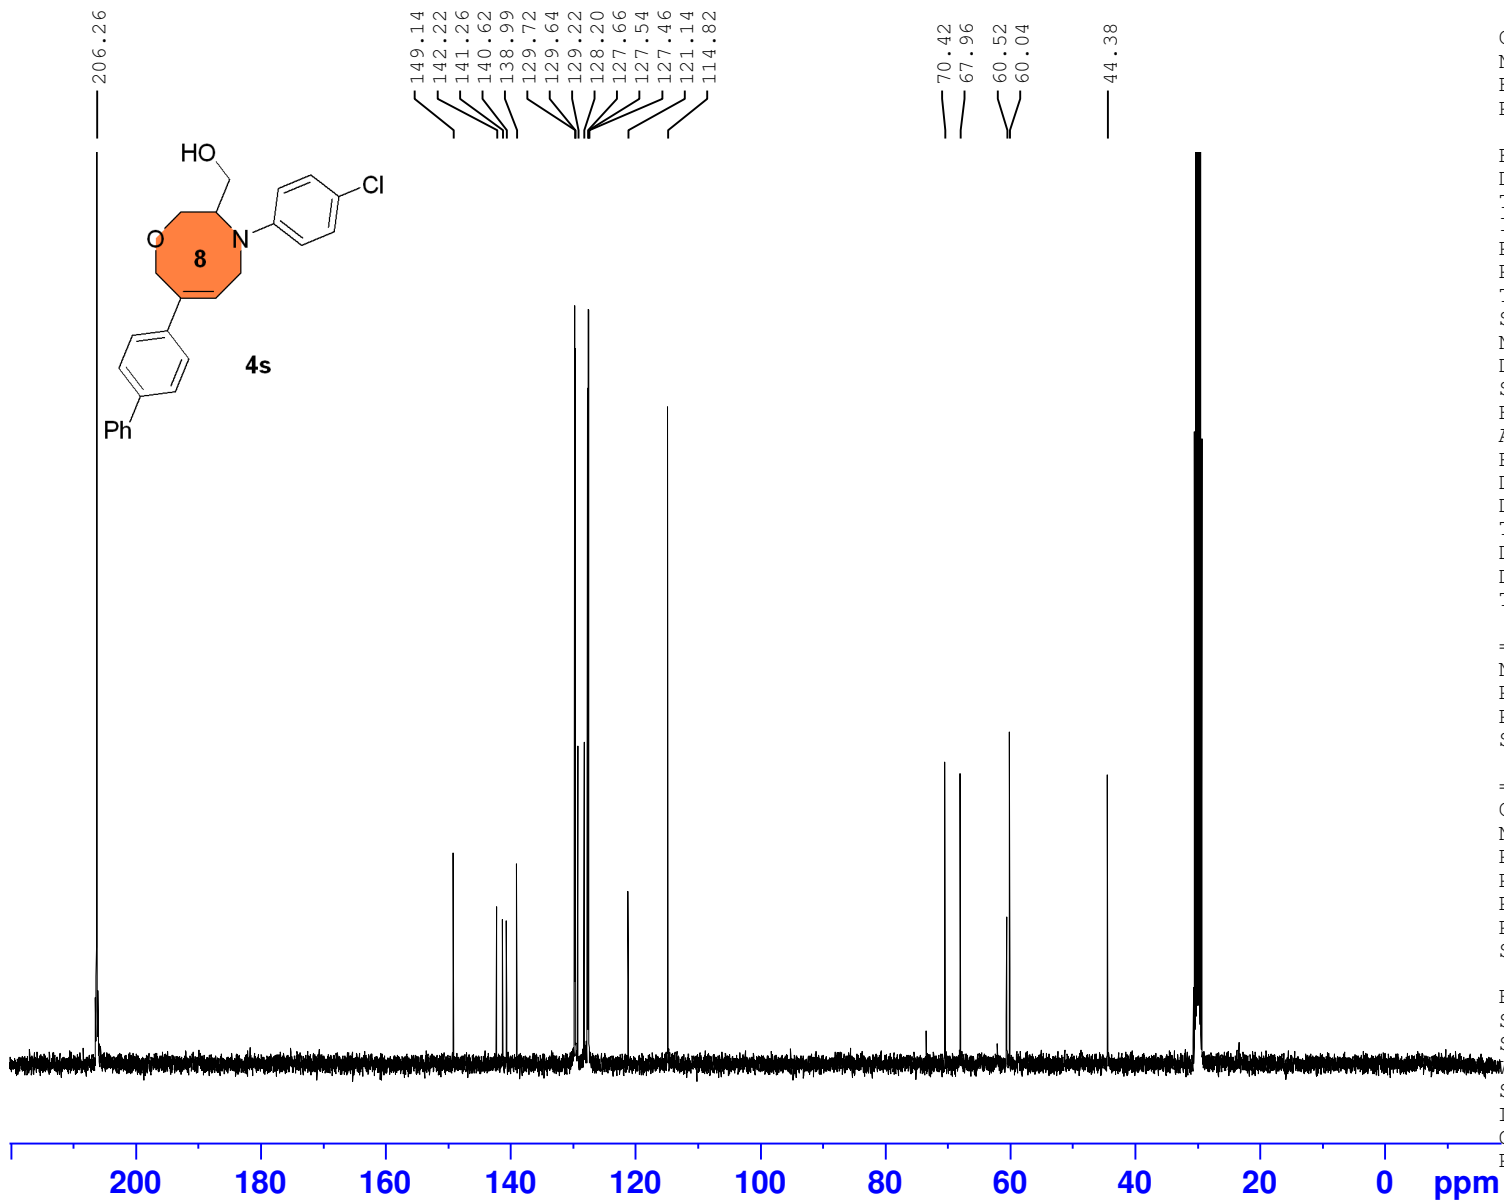

Current Data Parameters  
NAME 20230531-400M  
EXPNO 206  
PROCNO 1

F2 - Acquisition Parameters  
Date\_ 20230531  
Time 6.58  
INSTRUM spect  
PROBHD 5 mm PABBO BB-  
PULPROG zgpg30  
TD 65536  
SOLVENT Acetone  
NS 400  
DS 4  
SWH 24038.461 Hz  
FIDRES 0.366798 Hz  
AQ 1.3631488 sec  
RG 193.13  
DW 20.800 usec  
DE 6.50 usec  
TE 294.2 K  
D1 2.00000000 sec  
D11 0.03000000 sec  
TD0 1

==== CHANNEL f1 =====  
NUC1 13C  
P1 12.00 usec  
PLW1 53.00000000 W  
SFO1 100.6379178 MHz

==== CHANNEL f2 =====  
CPDPRG[2] waltz16  
NUC2 1H  
PCPD2 90.00 usec  
PLW2 14.00000000 W  
PLW12 0.37246999 W  
PLW13 0.30170000 W  
SFO2 400.1916008 MHz

F2 - Processing parameters  
SI 32768  
SF 100.6277710 MHz  
WDW EM  
SSB 0  
LB 1.00 Hz  
GB 0  
PC 1.40

ljx-5-17

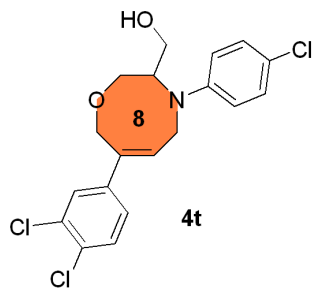

7.532  
7.527  
7.519  
7.498  
7.329  
7.324  
7.309  
7.303  
7.165  
7.142  
6.895  
6.872  
6.430  
6.417  
6.403  
4.639  
4.625  
4.594  
4.580  
4.501  
4.192  
4.177  
4.160  
4.146  
4.054  
4.039  
4.025  
4.004  
3.990  
3.959  
3.945  
3.925  
3.806  
3.800  
3.785  
3.769  
3.753  
2.061  
2.056  
2.050  
2.045  
2.039



Current Data Parameters  
NAME 20231026-400m  
EXPNO 2  
PROCNO 1

F2 - Acquisition Parameters  
Date\_ 20231025  
Time 21.57  
INSTRUM spect  
PROBHD 5 mm PADUL 13C  
PULPROG zg30  
TD 65536  
SOLVENT Acetone  
NS 8  
DS 2  
SWH 8223.685 Hz  
FIDRES 0.125483 Hz  
AQ 3.9845889 sec  
RG 100.49  
DW 60.800 usec  
DE 6.50 usec  
TE 293.9 K  
D1 1.00000000 sec  
TD0 1

==== CHANNEL f1 =====  
NUC1 1H  
P1 9.90 usec  
PLW1 23.00000000 W  
SFO1 400.1924713 MHz

F2 - Processing parameters  
SI 65536  
SF 400.1900111 MHz  
WDW EM  
SSB 0  
LB 0.30 Hz  
GB 0  
PC 1.00

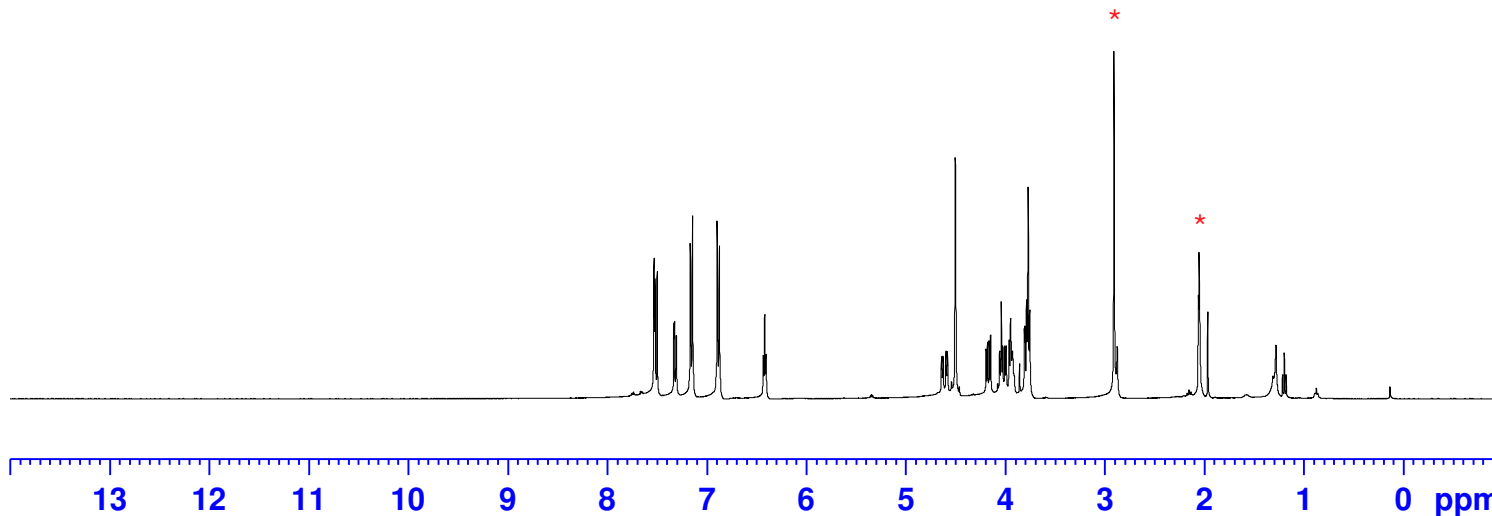

2.06  
1.10  
2.05  
2.05  
1.00  
1.18  
2.09  
1.21  
3.21  
3.12

ljx-3-96

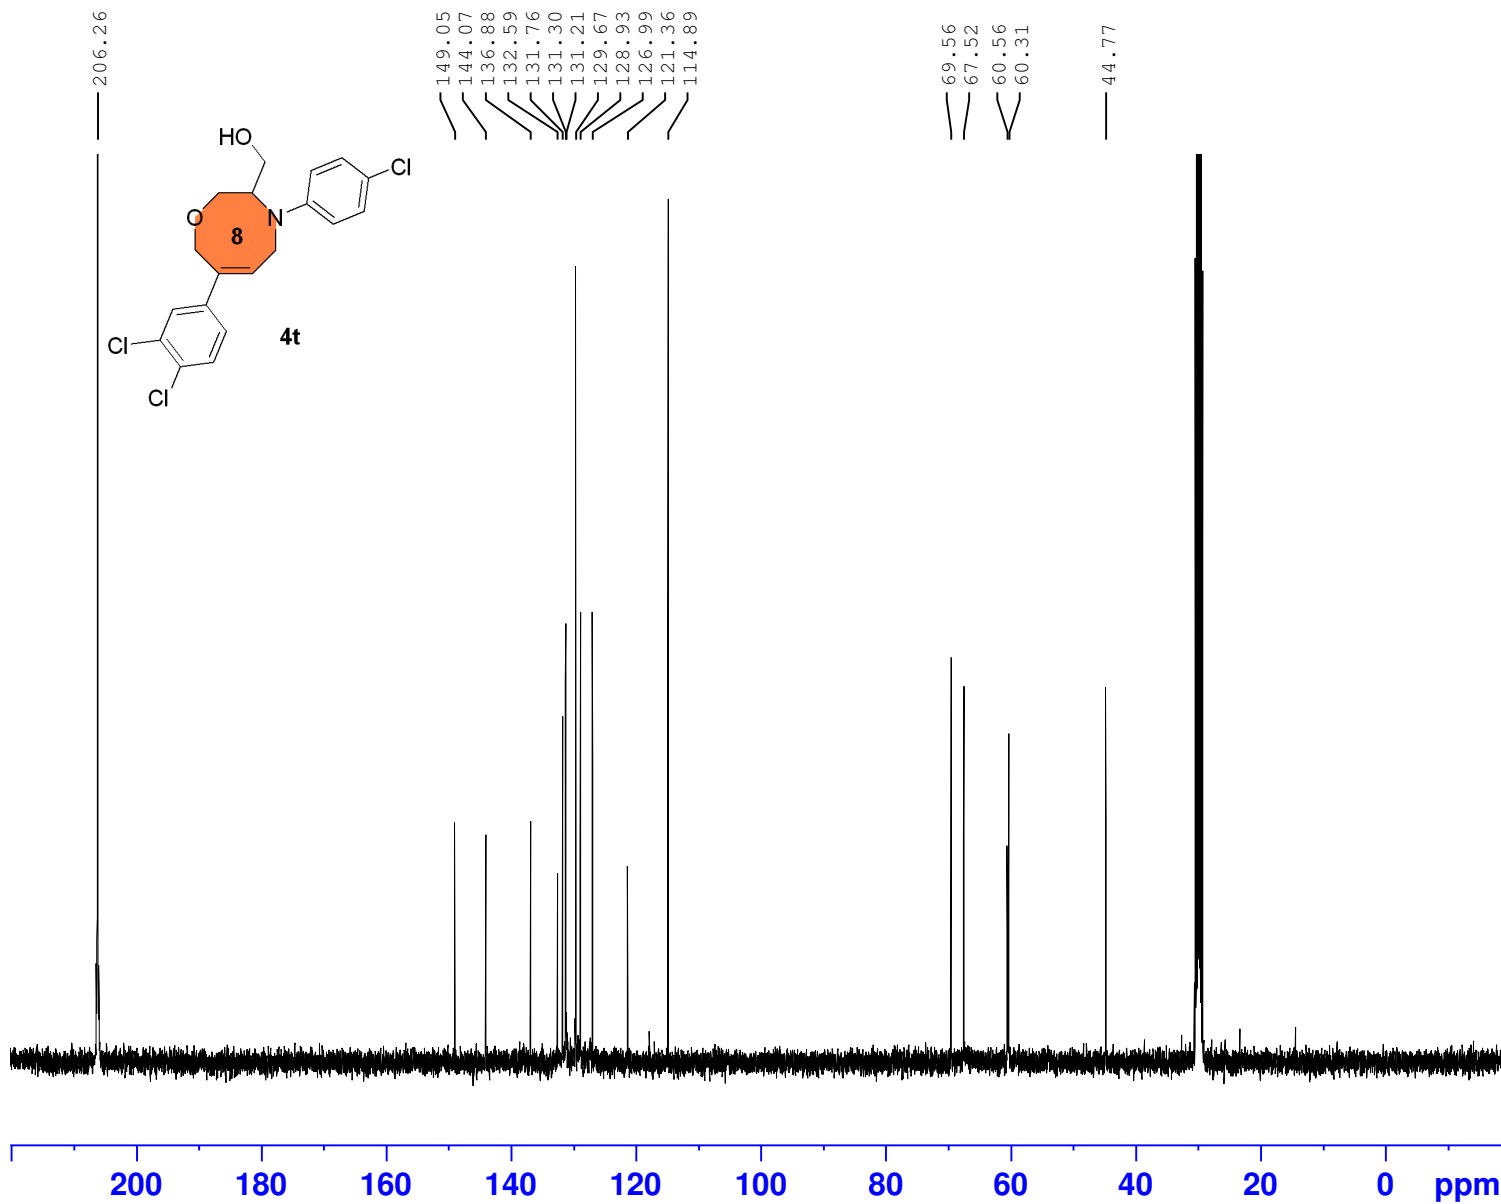

Current Data Parameters  
NAME 20230531-400M  
EXPNO 202  
PROCNO 1

F2 - Acquisition Parameters  
Date\_ 20230531  
Time 6.01  
INSTRUM spect  
PROBHD 5 mm PABBO BB-  
PULPROG zgpg30  
TD 65536  
SOLVENT Acetone  
NS 400  
DS 4  
SWH 24038.461 Hz  
FIDRES 0.366798 Hz  
AQ 1.3631488 sec  
RG 193.13  
DW 20.800 usec  
DE 6.50 usec  
TE 294.3 K  
D1 2.00000000 sec  
D11 0.03000000 sec  
TD0 1

==== CHANNEL f1 =====  
NUC1 13C  
P1 12.00 usec  
PLW1 53.00000000 W  
SFO1 100.6379178 MHz

==== CHANNEL f2 =====  
CPDPRG[2] waltz16  
NUC2 1H  
PCPD2 90.00 usec  
PLW2 14.00000000 W  
PLW12 0.37246999 W  
PLW13 0.30170000 W  
SFO2 400.1916008 MHz

F2 - Processing parameters  
SI 32768  
SF 100.6277699 MHz  
WDW EM  
SSB 0  
LB 1.00 Hz  
GB 0  
PC 1.40

ljx-3-94

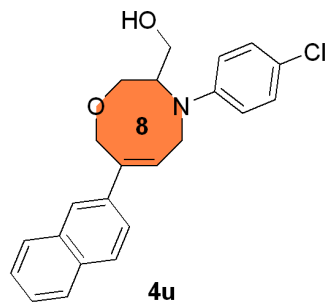

7.881  
7.862  
7.831  
7.820  
7.528  
7.507  
7.488  
7.471  
7.457  
7.440  
7.178  
7.156  
6.925  
6.903  
6.471  
6.457  
6.443  
4.715  
4.694  
4.678  
4.651  
4.636  
4.609  
4.572  
4.260  
4.247  
4.229  
4.216  
4.007  
3.992  
3.962  
3.948  
3.839  
3.820  
3.806  
3.790  
2.049

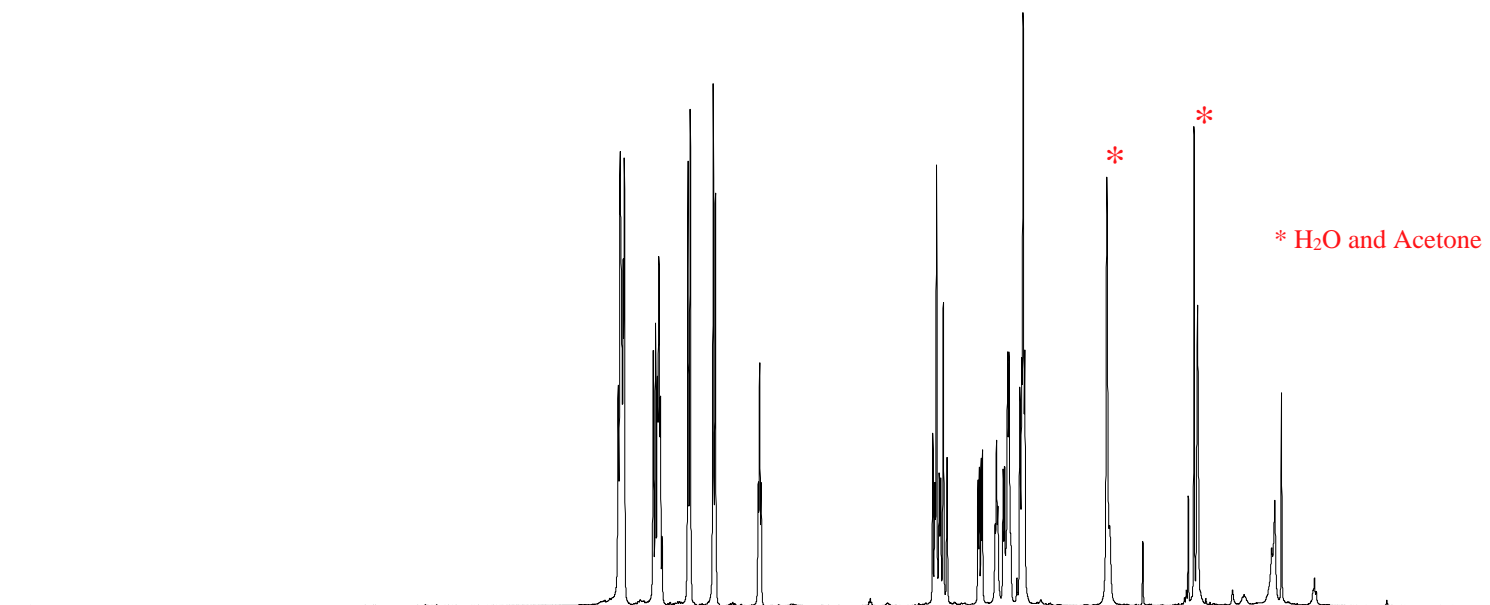

4.06  
3.10  
1.96  
2.02  
1.00  
3.04  
1.01  
2.05  
3.03

Current Data Parameters  
NAME 20230531-400M  
EXPNO 207  
PROCNO 1

F2 - Acquisition Parameters  
Date\_ 20230531  
Time 7.02  
INSTRUM spect  
PROBHD 5 mm PABBO BB-  
PULPROG zg30  
TD 65536  
SOLVENT Acetone  
NS 8  
DS 2  
SWH 8223.685 Hz  
FIDRES 0.125483 Hz  
AQ 3.9845889 sec  
RG 68.24  
DW 60.800 usec  
DE 6.50 usec  
TE 293.5 K  
D1 1.00000000 sec  
TD0 1

\* H<sub>2</sub>O and Acetone

==== CHANNEL f1 =====  
NUC1 1H  
P1 14.68 usec  
PLW1 14.00000000 W  
SFO1 400.1924713 MHz

F2 - Processing parameters  
SI 65536  
SF 400.1900131 MHz  
WDW EM  
SSB 0  
LB 0.30 Hz  
GB 0  
PC 1.00

ljx-3-94

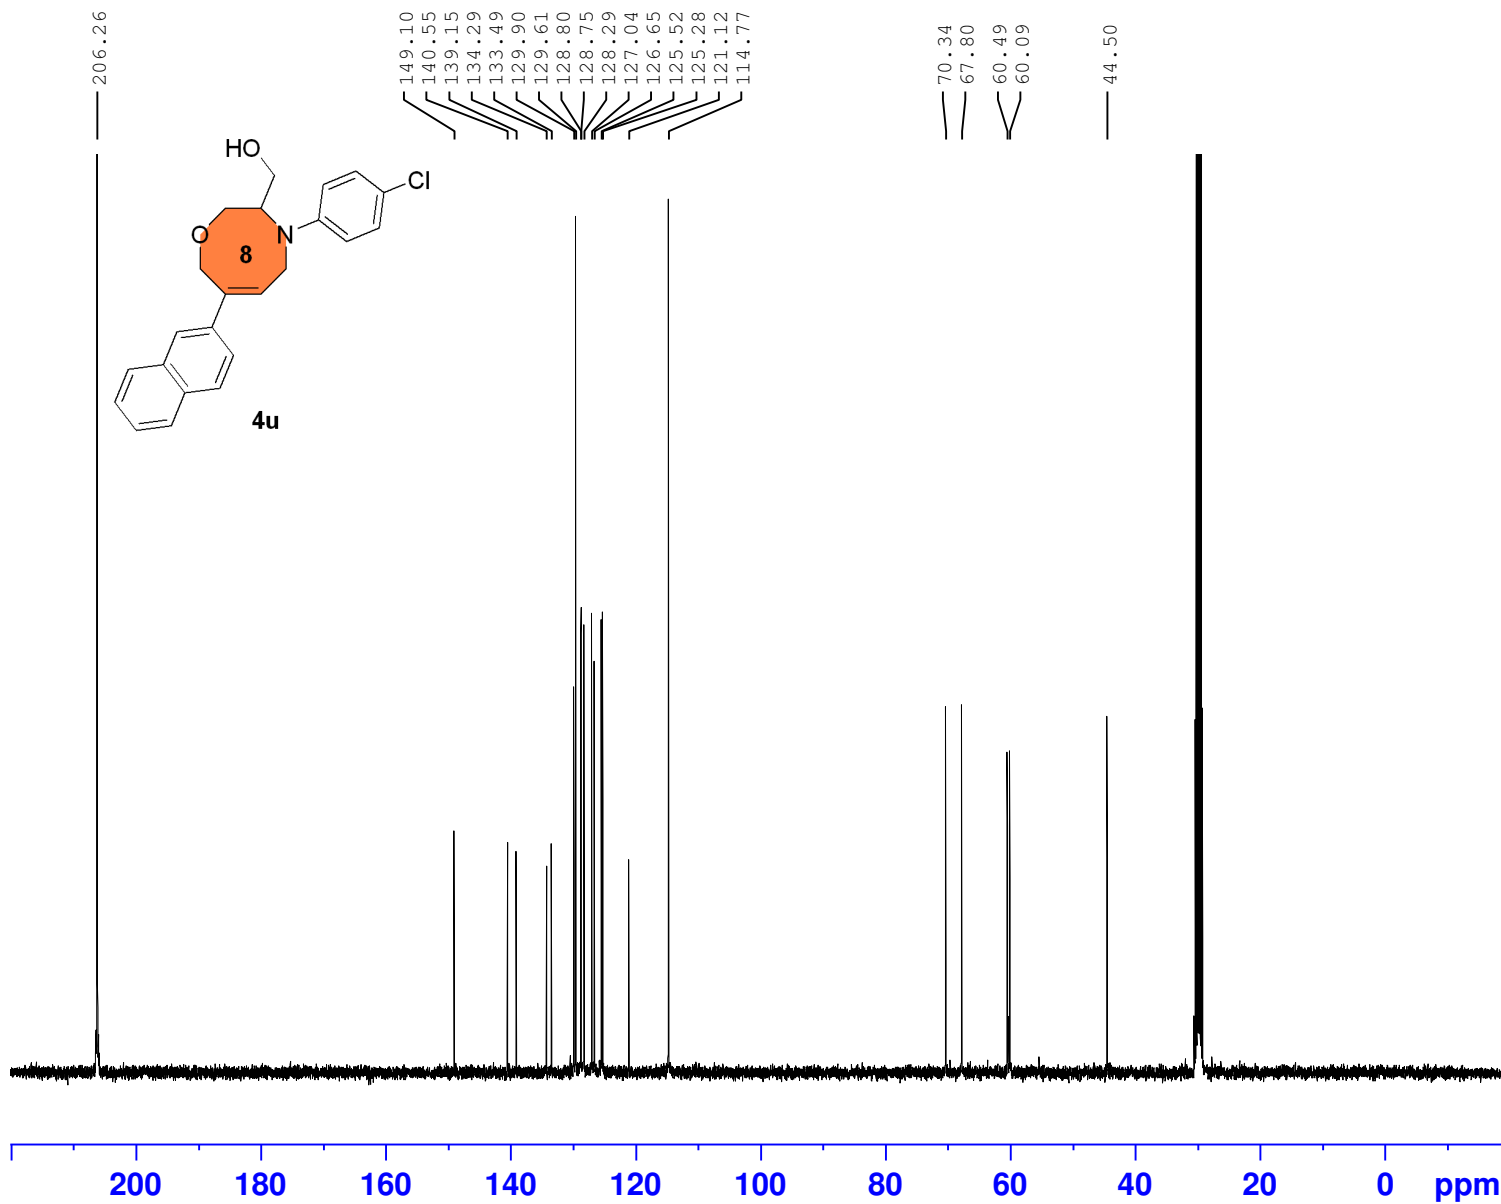

Current Data Parameters  
NAME 20230531-400M  
EXPNO 208  
PROCNO 1

F2 - Acquisition Parameters  
Date\_ 20230531  
Time 7.26  
INSTRUM spect  
PROBHD 5 mm PABBO BB-  
PULPROG zgpg30  
TD 65536  
SOLVENT Acetone  
NS 400  
DS 4  
SWH 24038.461 Hz  
FIDRES 0.366798 Hz  
AQ 1.3631488 sec  
RG 193.13  
DW 20.800 usec  
DE 6.50 usec  
TE 294.2 K  
D1 2.00000000 sec  
D11 0.03000000 sec  
TD0 1

==== CHANNEL f1 =====  
NUC1 13C  
P1 12.00 usec  
PLW1 53.00000000 W  
SFO1 100.6379178 MHz

==== CHANNEL f2 =====  
CPDPRG[2] waltz16  
NUC2 1H  
PCPD2 90.00 usec  
PLW2 14.00000000 W  
PLW12 0.37246999 W  
PLW13 0.30170000 W  
SFO2 400.1916008 MHz

F2 - Processing parameters  
SI 32768  
SF 100.6277767 MHz  
WDW EM  
SSB 0  
LB 1.00 Hz  
GB 0  
PC 1.40



ljx-2-45

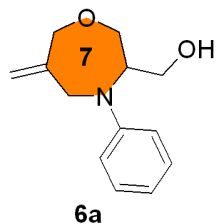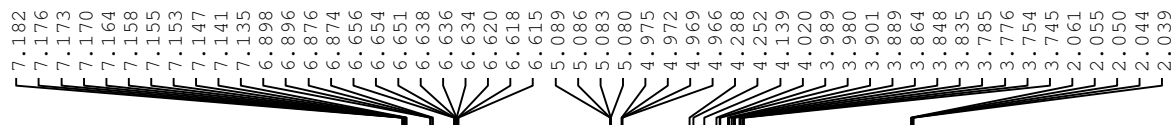

Current Data Parameters  
NAME 20230610-400  
EXPNO 11  
PROCNO 1

F2 - Acquisition Parameters  
Date\_ 20230609  
Time 23.04  
INSTRUM spect  
PROBHD 5 mm PADUL 13C  
PULPROG zg30  
TD 65536  
SOLVENT Acetone  
NS 6  
DS 0  
SWH 8223.685 Hz  
FIDRES 0.125483 Hz  
AQ 3.9845889 sec  
RG 61.19  
DW 60.800 usec  
DE 6.50 usec  
TE 291.4 K  
D1 1.00000000 sec  
TD0 1

\* H<sub>2</sub>O and Acetone

==== CHANNEL f1 =====  
NUC1 1H  
P1 9.90 usec  
PLW1 23.00000000 W  
SFO1 400.1924713 MHz

F2 - Processing parameters  
SI 65536  
SF 400.1900111 MHz  
WDW EM  
SSB 0  
LB 0.30 Hz  
GB 0  
PC 1.00

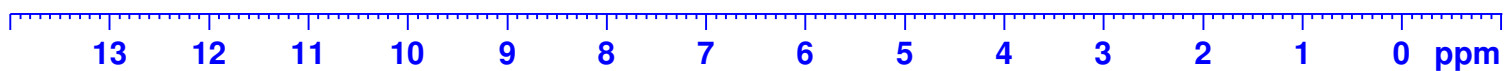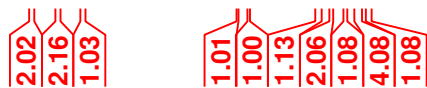

ljx-2-4-5

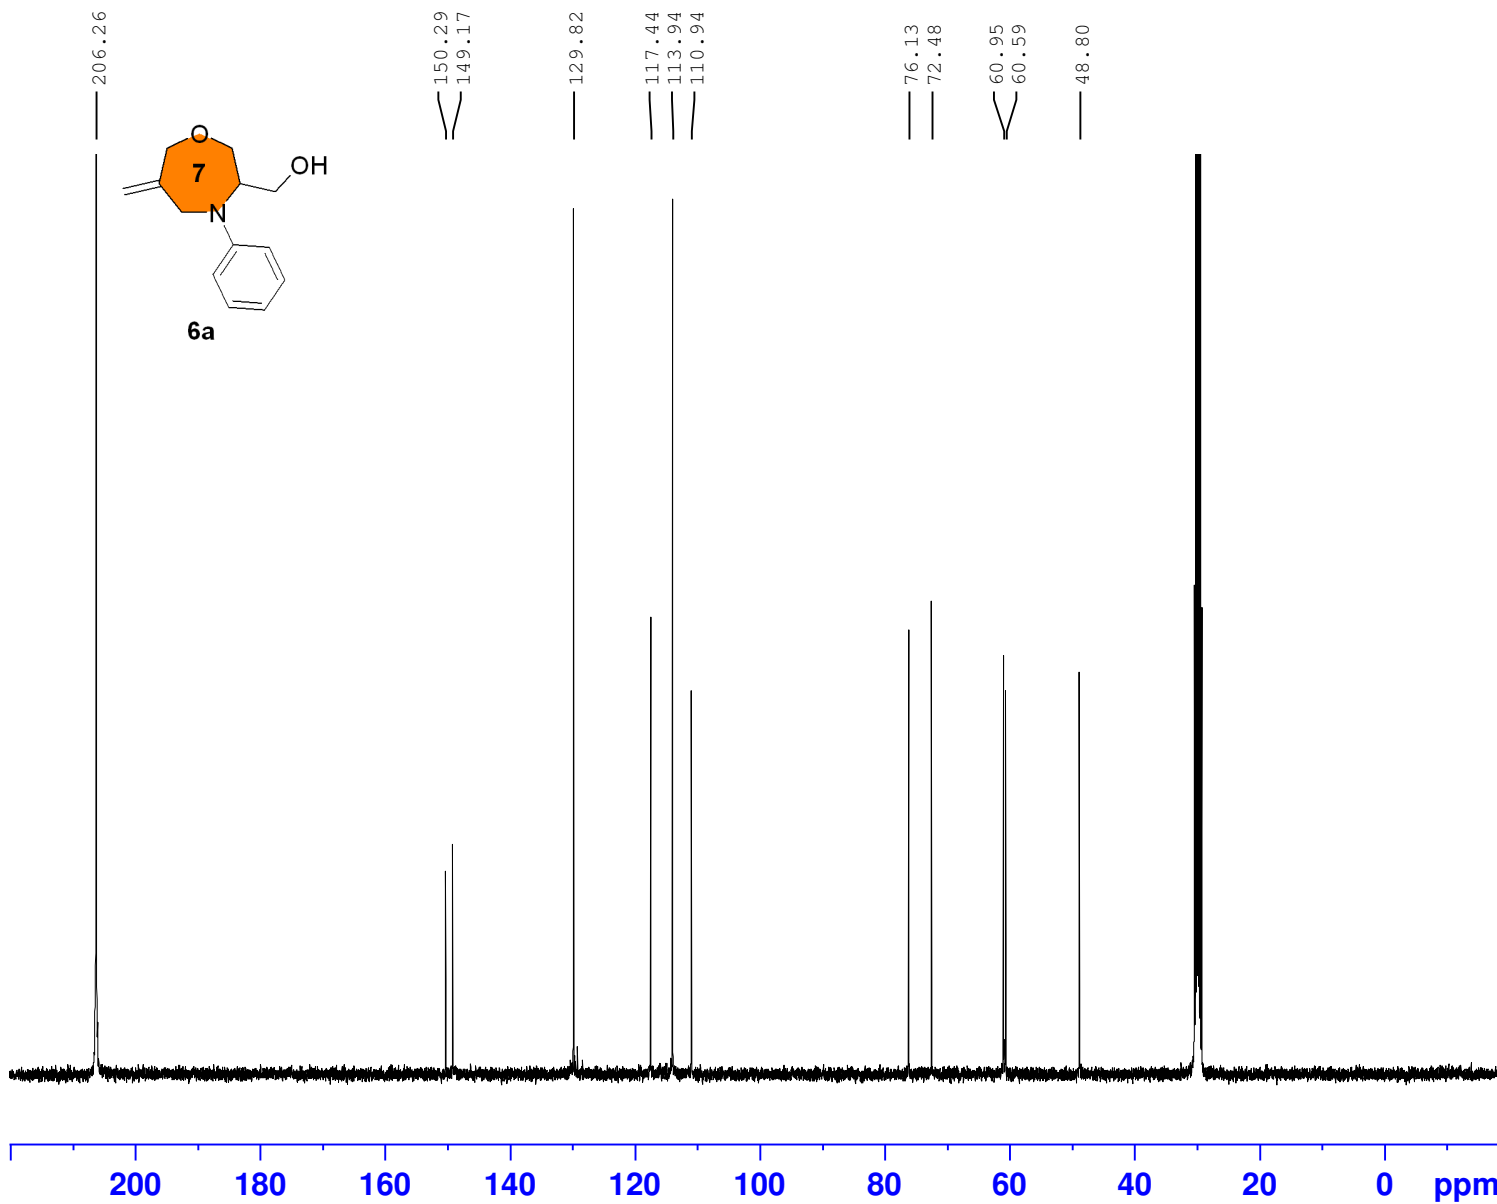

Current Data Parameters  
NAME 20230614-400M  
EXPNO 47  
PROCNO 1

F2 - Acquisition Parameters  
Date\_ 20230614  
Time 6.57  
INSTRUM spect  
PROBHD 5 mm PADUL 13C  
PULPROG zgpg30  
TD 65536  
SOLVENT Acetone  
NS 500  
DS 4  
SWH 24038.461 Hz  
FIDRES 0.366798 Hz  
AQ 1.3631488 sec  
RG 44.2  
DW 20.800 usec  
DE 6.50 usec  
TE 293.6 K  
D1 2.00000000 sec  
D11 0.03000000 sec  
TD0 1

==== CHANNEL f1 =====  
NUC1 13C  
P1 9.80 usec  
PLW1 47.40000153 W  
SFO1 100.6379178 MHz

==== CHANNEL f2 =====  
CPDPRG[2] waltz16  
NUC2 1H  
PCPD2 90.00 usec  
PLW2 23.00000000 W  
PLW12 0.30712000 W  
PLW13 0.24877000 W  
SFO2 400.1916008 MHz

F2 - Processing parameters  
SI 32768  
SF 100.6277780 MHz  
WDW EM  
SSB 0  
LB 1.00 Hz  
GB 0  
PC 1.40

ljx-5-3

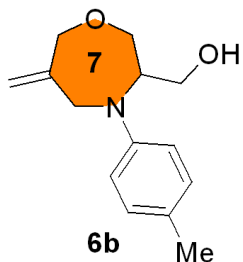

6.984  
6.963  
6.800  
6.779  
5.048  
5.045  
4.947  
4.944  
4.277  
4.241  
4.102  
4.008  
4.001  
3.992  
3.984  
3.975  
3.958  
3.868  
3.837  
3.826  
3.766  
3.756  
3.733  
3.723  
2.180  
2.086  
2.061  
2.056  
2.050  
2.045  
2.039  
2.022  
1.987  
1.979  
1.964

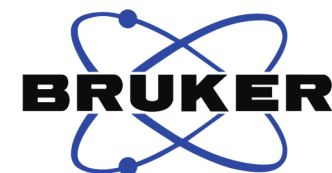

Current Data Parameters  
NAME 2023-9-25-400  
EXPNO 1  
PROCNO 1

F2 - Acquisition Parameters  
Date\_ 20230924  
Time 22.24  
INSTRUM spect  
PROBHD 5 mm PADUL 13C  
PULPROG zg30  
TD 65536  
SOLVENT Acetone  
NS 10  
DS 2  
SWH 8223.685 Hz  
FIDRES 0.125483 Hz  
AQ 3.9845889 sec  
RG 75.43  
DW 60.800 usec  
DE 6.50 usec  
TE 292.3 K  
D1 1.00000000 sec  
TD0 1

==== CHANNEL f1 =====  
NUC1 1H  
P1 9.90 usec  
PLW1 23.00000000 W  
SFO1 400.1924713 MHz

F2 - Processing parameters  
SI 65536  
SF 400.1900110 MHz  
WDW EM  
SSB 0  
LB 0.30 Hz  
GB 0  
PC 1.00

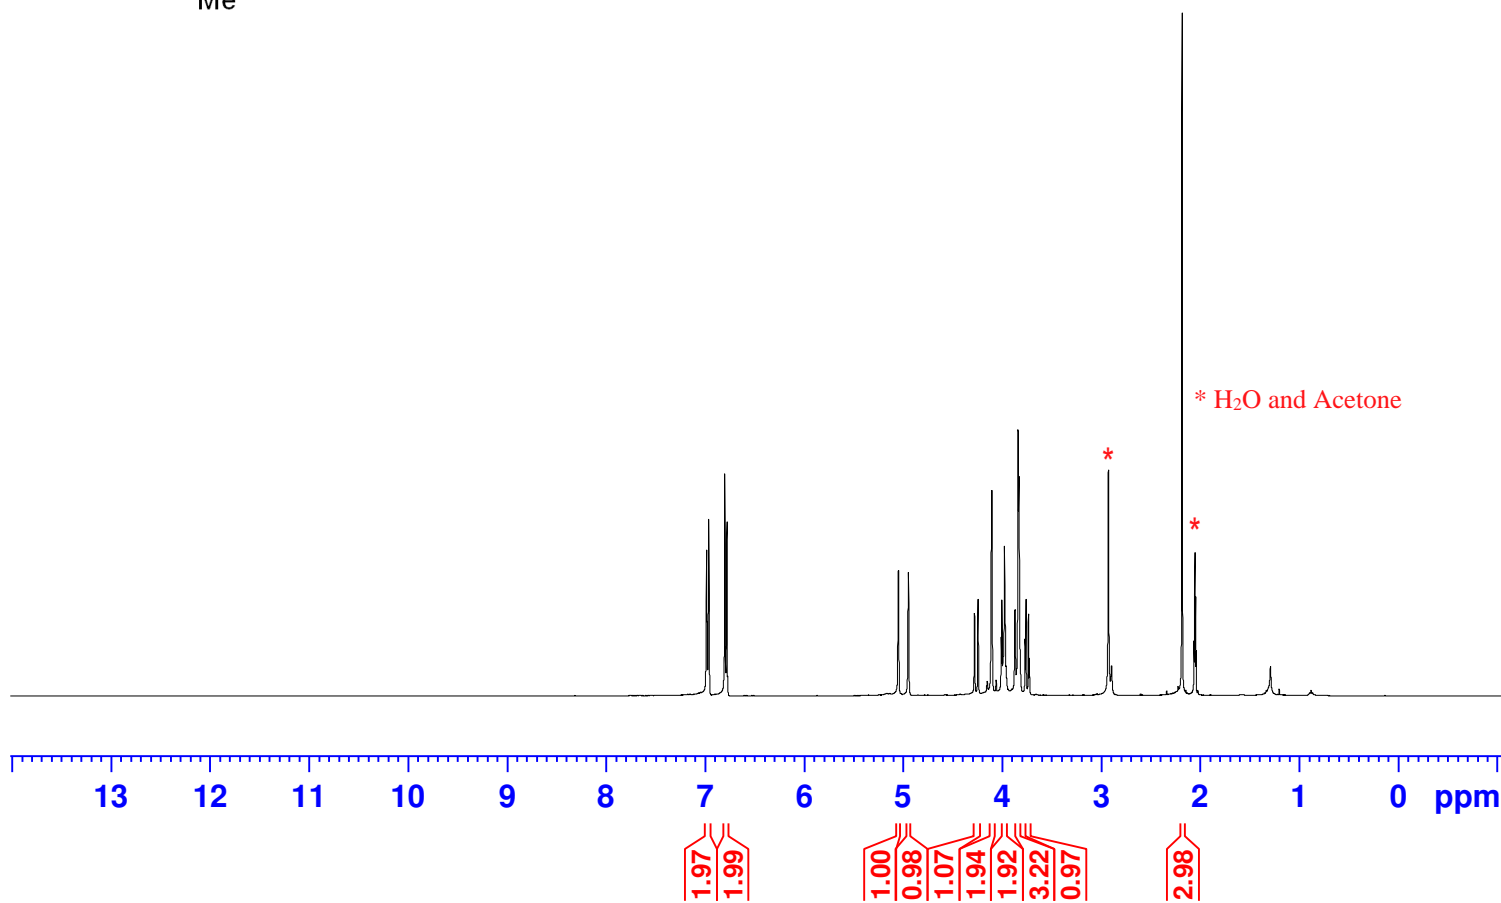

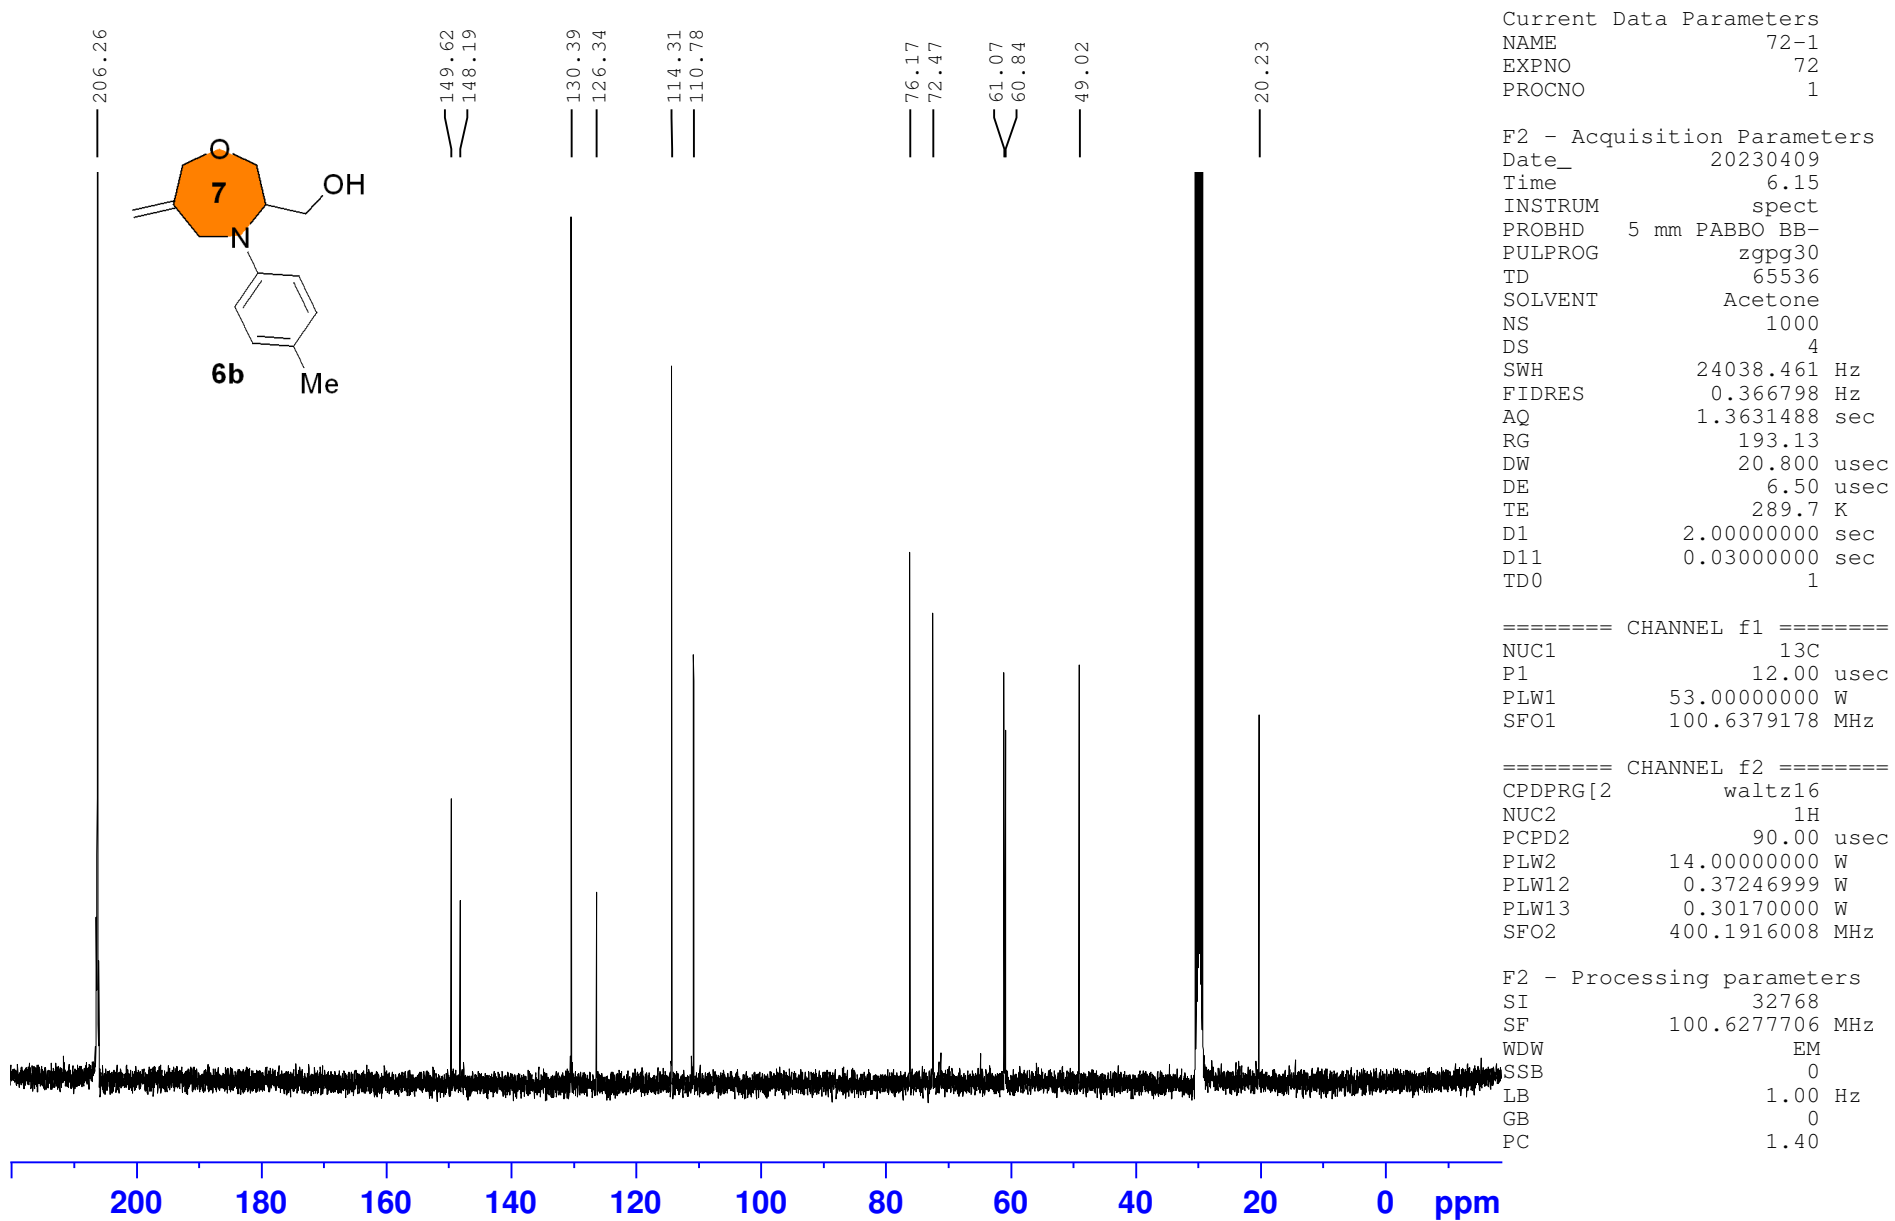

ljx-3-63

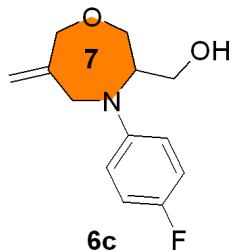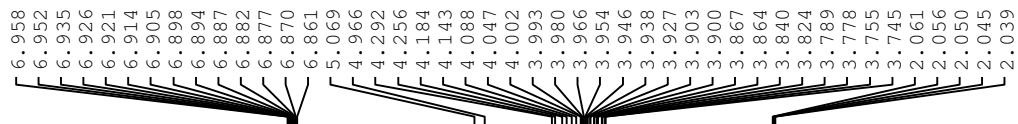

Current Data Parameters  
NAME 2023-9-27-400  
EXPNO 7  
PROCNO 1

F2 - Acquisition Parameters  
Date\_ 20230926  
Time 23.21  
INSTRUM spect  
PROBHD 5 mm PADUL 13C  
PULPROG zg30  
TD 65536  
SOLVENT Acetone  
NS 8  
DS 2  
SWH 8223.685 Hz  
FIDRES 0.125483 Hz  
AQ 3.9845889 sec  
RG 75.43  
DW 60.800 usec  
DE 6.50 usec  
TE 291.6 K  
D1 1.00000000 sec  
TD0 1

==== CHANNEL f1 =====  
NUC1 1H  
P1 9.90 usec  
PLW1 23.00000000 W  
SFO1 400.1924713 MHz

F2 - Processing parameters  
SI 65536  
SF 400.1900110 MHz  
WDW EM  
SSB 0  
LB 0.30 Hz  
GB 0  
PC 1.00

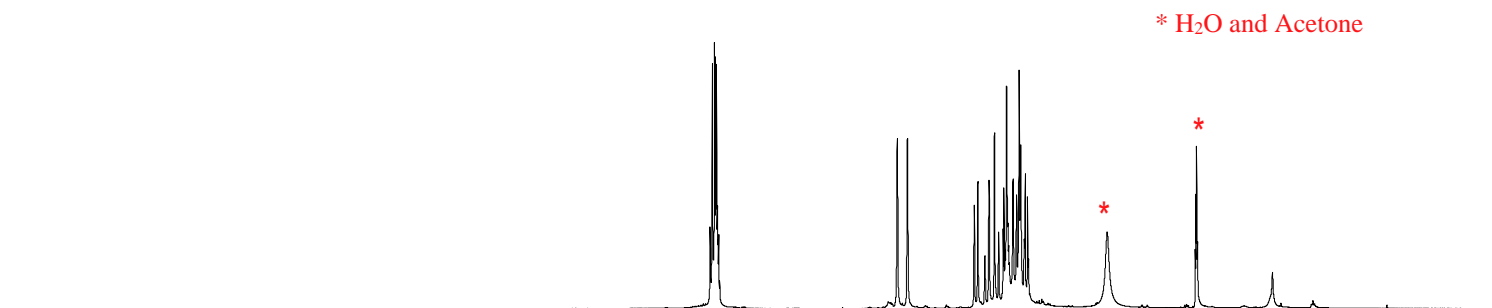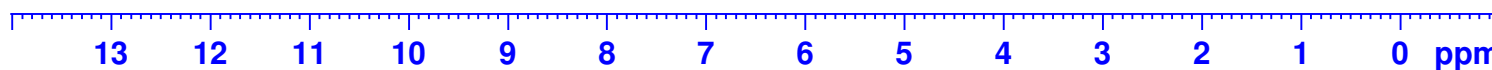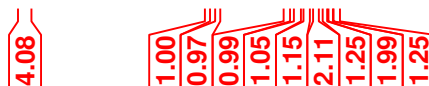

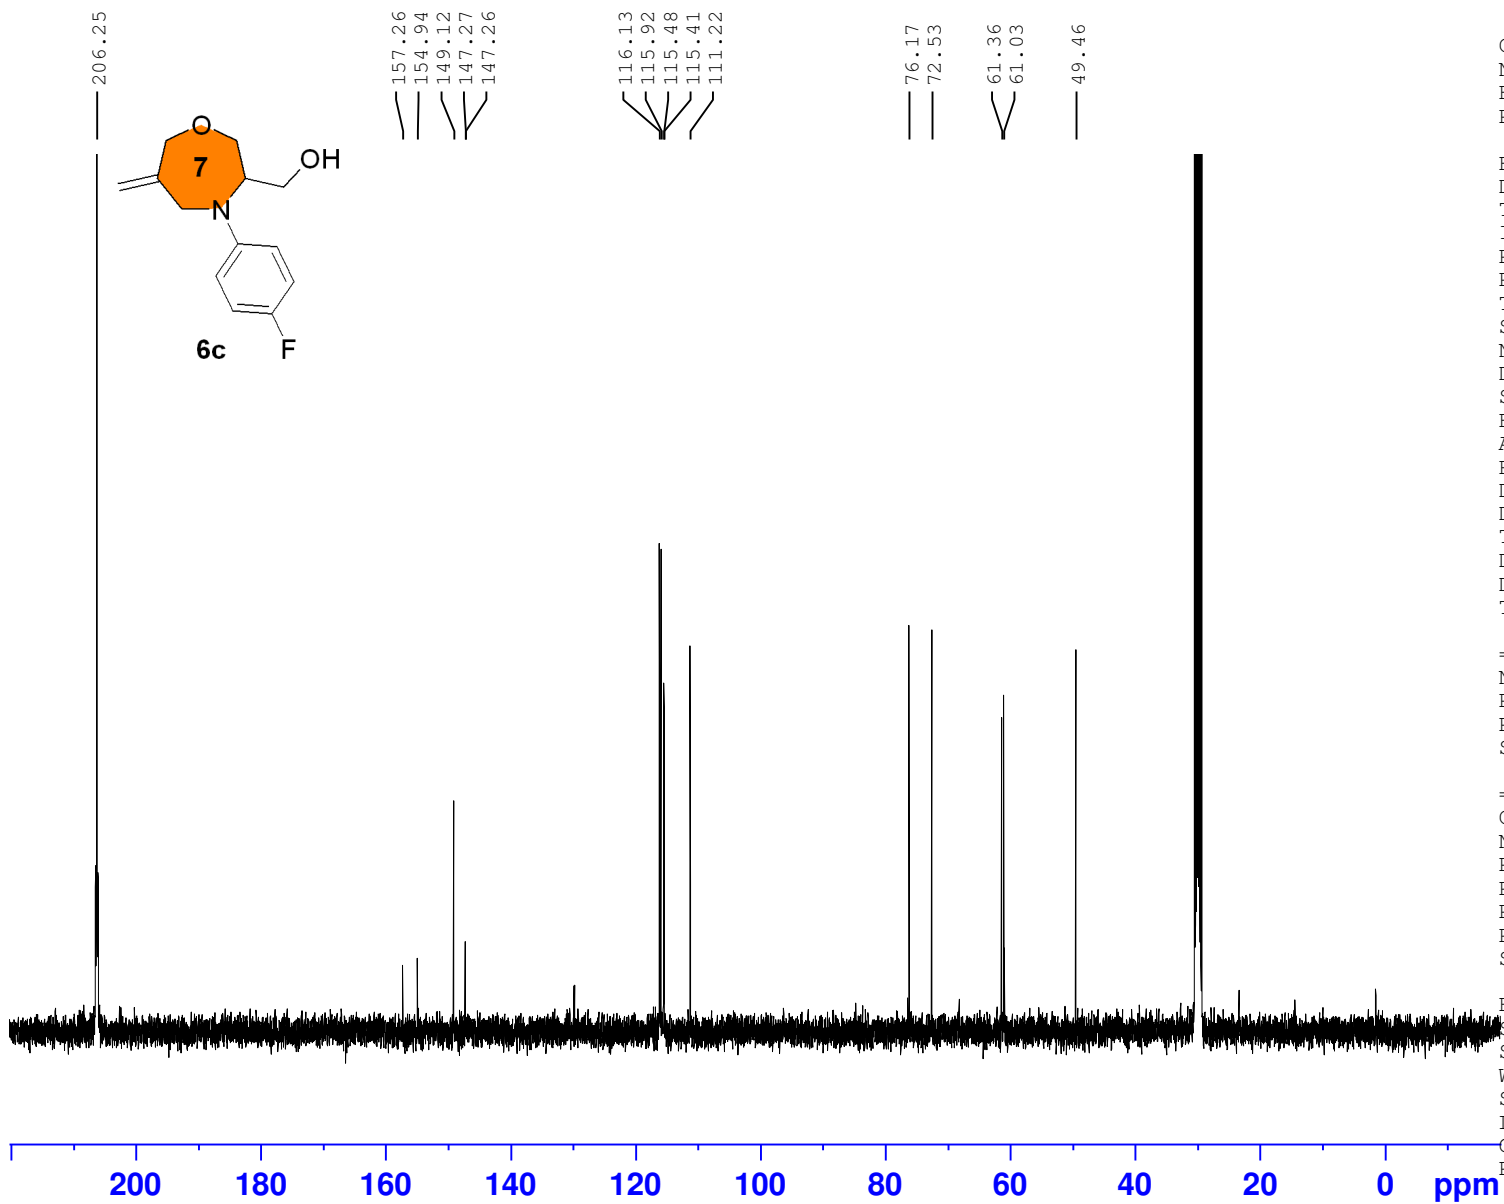

Current Data Parameters  
 NAME ljxNMR  
 EXPNO 53  
 PROCNO 1

F2 - Acquisition Parameters  
 Date\_ 20230422  
 Time 6.18  
 INSTRUM spect  
 PROBHD 5 mm PABBO BB-  
 PULPROG zgpg30  
 TD 65536  
 SOLVENT Acetone  
 NS 900  
 DS 4  
 SWH 24038.461 Hz  
 FIDRES 0.366798 Hz  
 AQ 1.3631488 sec  
 RG 193.13  
 DW 20.800 usec  
 DE 6.50 usec  
 TE 290.9 K  
 D1 2.00000000 sec  
 D11 0.03000000 sec  
 TD0 1

==== CHANNEL f1 =====  
 NUC1 13C  
 P1 12.00 usec  
 PLW1 53.00000000 W  
 SFO1 100.6379178 MHz

==== CHANNEL f2 =====  
 CPDPRG[2] waltz16  
 NUC2 1H  
 PCPD2 90.00 usec  
 PLW2 14.00000000 W  
 PLW12 0.37246999 W  
 PLW13 0.30170000 W  
 SFO2 400.1916008 MHz

F2 - Processing parameters  
 SI 32768  
 SF 100.6277688 MHz  
 WDW EM  
 SSB 0  
 LB 1.00 Hz  
 GB 0  
 PC 1.40

# <sup>19</sup>F NMR

LJX-3-63

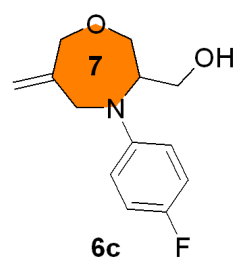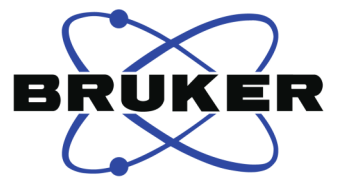

Current Data Parameters  
NAME 0927HH  
EXPNO 6  
PROCNO 1

F2 - Acquisition Parameters  
Date\_ 20230927  
Time 16.32 h  
INSTRUM Avance  
PROBHD z116098\_0833 (  
PULPROG zgig  
TD 131072  
SOLVENT Acetone  
NS 16  
DS 4  
SWH 90909.094 Hz  
FIDRES 1.387163 Hz  
AQ 0.7208960 sec  
RG 101  
DW 5.500 usec  
DE 6.50 usec  
TE 294.5 K  
D1 1.00000000 sec  
D11 0.03000000 sec  
TD0 1  
SFO1 376.4607164 MHz  
NUC1 19F  
P1 18.00 usec  
PLW1 16.73100090 W  
SFO2 400.1316005 MHz  
NUC2 1H  
CPDPRG[2] waltz16  
PCPD2 90.00 usec  
PLW2 20.73200035 W  
PLW12 0.25595000 W

F2 - Processing parameters  
SI 65536  
SF 376.4983662 MHz  
WDW EM  
SSB 0  
LB 0.30 Hz  
GB 0  
PC 1.00

-130.373

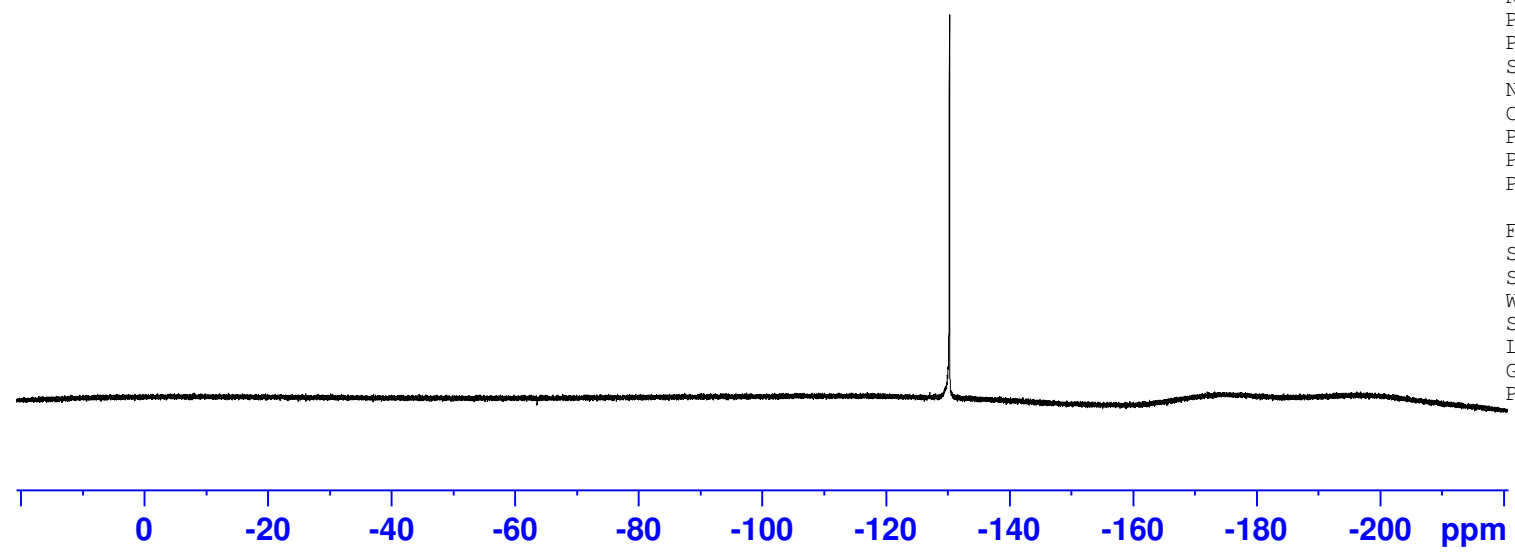

LJX-3-53

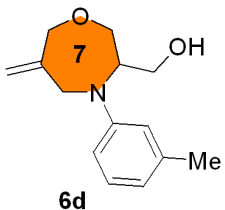

7.051  
7.031  
7.012  
6.723  
6.692  
6.686  
6.671  
6.665  
6.481  
6.463  
5.078  
5.076  
4.964  
4.962  
4.281  
4.246  
4.124  
4.013  
3.982  
3.974  
3.881  
3.868  
3.857  
3.852  
3.842  
3.836  
3.824  
3.771  
3.763  
3.740  
3.732  
2.232  
2.061  
2.055  
2.050  
2.044  
2.039

Current Data Parameters  
NAME 230407-400M  
EXPNO 30  
PROCNO 1

F2 - Acquisition Parameters  
Date\_ 20230408  
Time 8.35  
INSTRUM spect  
PROBHD 5 mm PABBO BB-  
PULPROG zg30  
TD 65536  
SOLVENT Acetone  
NS 8  
DS 2  
SWH 8223.685 Hz  
FIDRES 0.125483 Hz  
AQ 3.9845889 sec  
RG 113.67  
DW 60.800 usec  
DE 6.50 usec  
TE 289.5 K  
D1 1.00000000 sec  
TD0 1

==== CHANNEL f1 =====  
NUC1 1H  
P1 14.68 usec  
PLW1 14.00000000 W  
SFO1 400.1924713 MHz

F2 - Processing parameters  
SI 65536  
SF 400.1900123 MHz  
WDW EM  
SSB 0  
LB 0.30 Hz  
GB 0  
PC 1.00

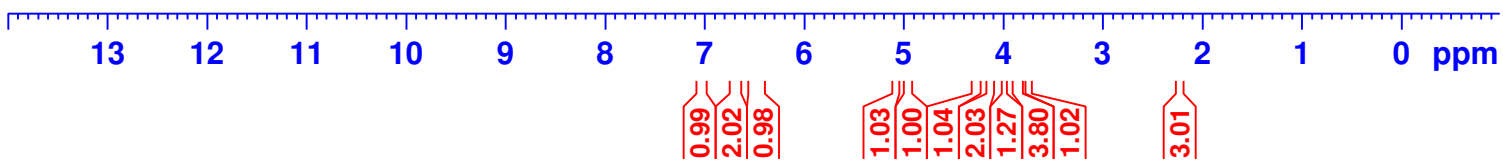



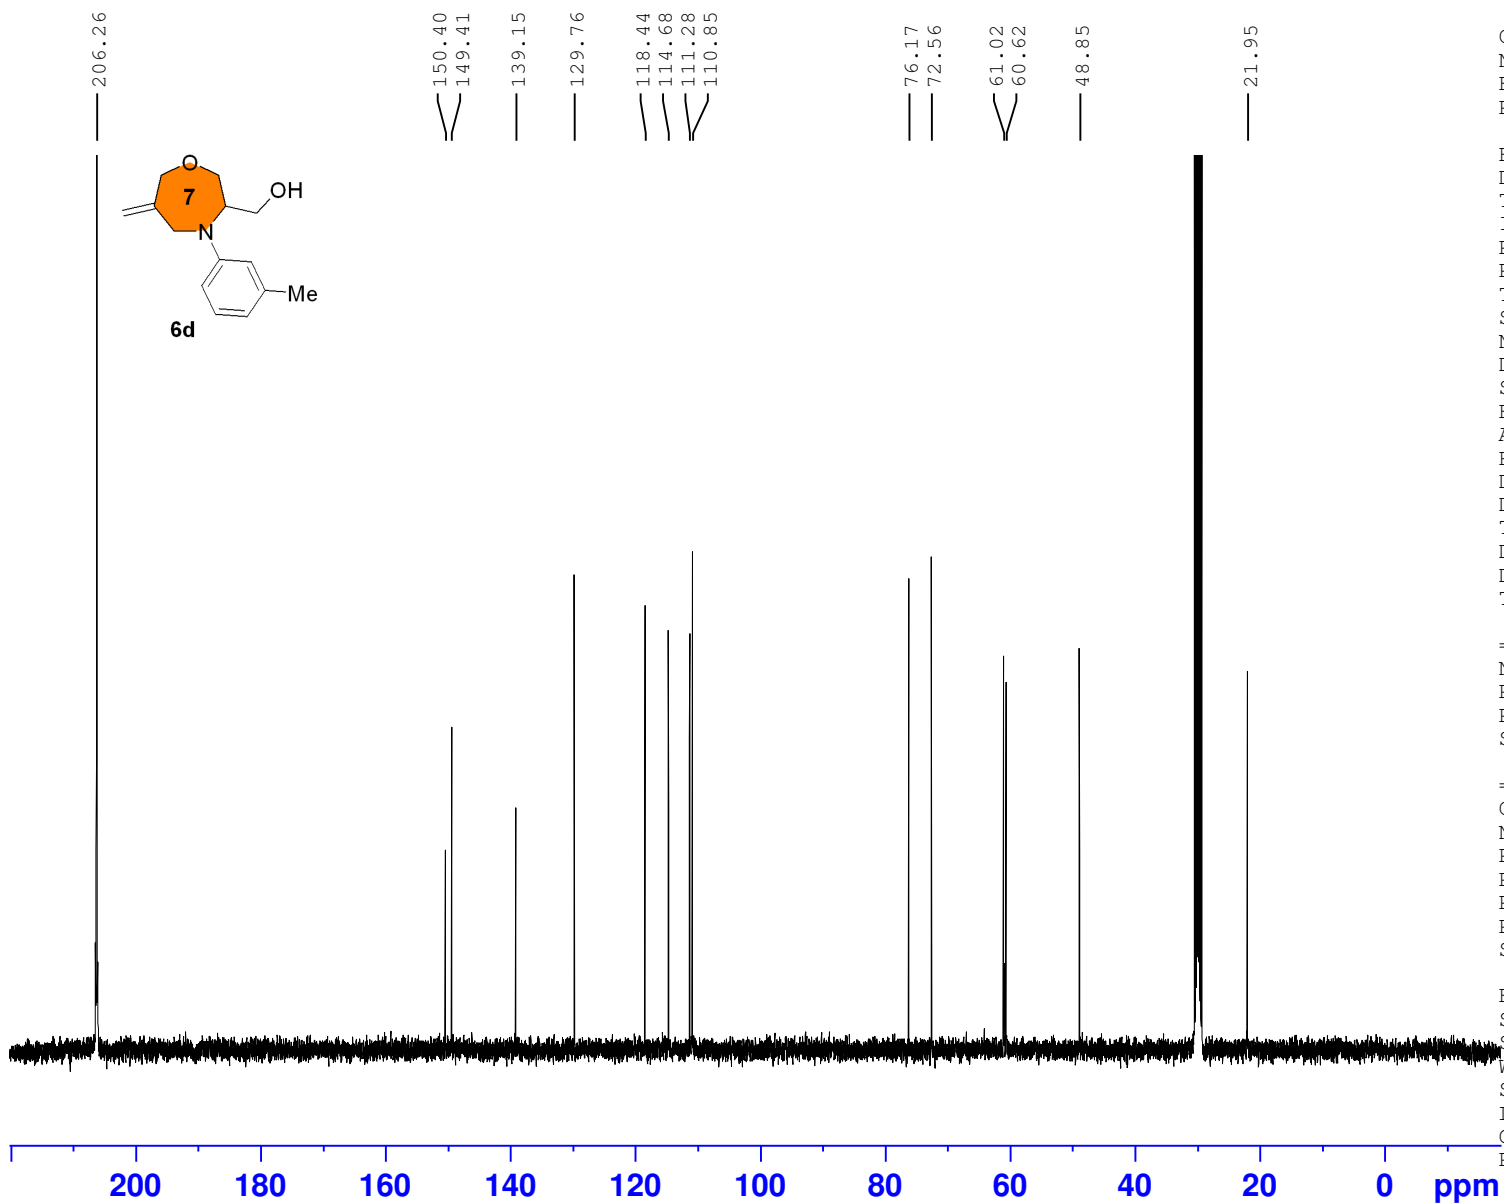

Current Data Parameters  
 NAME 230407-400M  
 EXPNO 31  
 PROCNO 1

F2 - Acquisition Parameters  
 Date\_ 20230408  
 Time 9.05  
 INSTRUM spect  
 PROBHD 5 mm PABBO BB-  
 PULPROG zgpg30  
 TD 65536  
 SOLVENT Acetone  
 NS 500  
 DS 4  
 SWH 24038.461 Hz  
 FIDRES 0.366798 Hz  
 AQ 1.3631488 sec  
 RG 193.13  
 DW 20.800 usec  
 DE 6.50 usec  
 TE 290.1 K  
 D1 2.00000000 sec  
 D11 0.03000000 sec  
 TD0 1

===== CHANNEL f1 =====  
 NUC1 13C  
 P1 12.00 usec  
 PLW1 53.00000000 W  
 SFO1 100.6379178 MHz

===== CHANNEL f2 =====  
 CPDPRG[2] waltz16  
 NUC2 1H  
 PCPD2 90.00 usec  
 PLW2 14.00000000 W  
 PLW12 0.37246999 W  
 PLW13 0.30170000 W  
 SFO2 400.1916008 MHz

F2 - Processing parameters  
 SI 32768  
 SF 100.6277717 MHz  
 WDW EM  
 SSB 0  
 LB 1.00 Hz  
 GB 0  
 PC 1.40

ljx-5-5

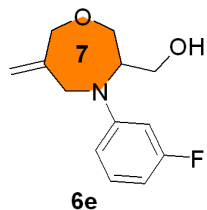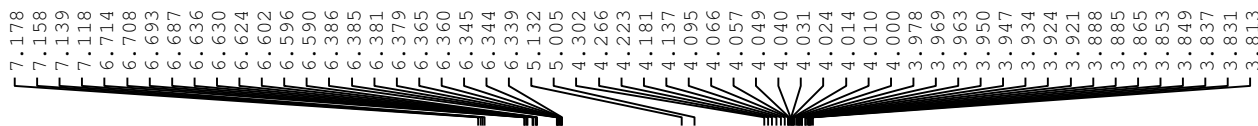

Current Data Parameters  
NAME 20231028-400M  
EXPNO 4  
PROCNO 1

F2 - Acquisition Parameters  
Date\_ 20231027  
Time 21.55  
INSTRUM spect  
PROBHD 5 mm PADUL 13C  
PULPROG zg30  
TD 65536  
SOLVENT Acetone  
NS 8  
DS 0  
SWH 8223.685 Hz  
FIDRES 0.125483 Hz  
AQ 3.9845889 sec  
RG 75.43  
DW 60.800 usec  
DE 6.50 usec  
TE 292.4 K  
D1 1.00000000 sec  
TD0 1

==== CHANNEL f1 =====  
NUC1 1H  
P1 9.90 usec  
PLW1 23.00000000 W  
SFO1 400.1924713 MHz

F2 - Processing parameters  
SI 65536  
SF 400.1900112 MHz  
WDW EM  
SSB 0  
LB 0.30 Hz  
GB 0  
PC 1.00

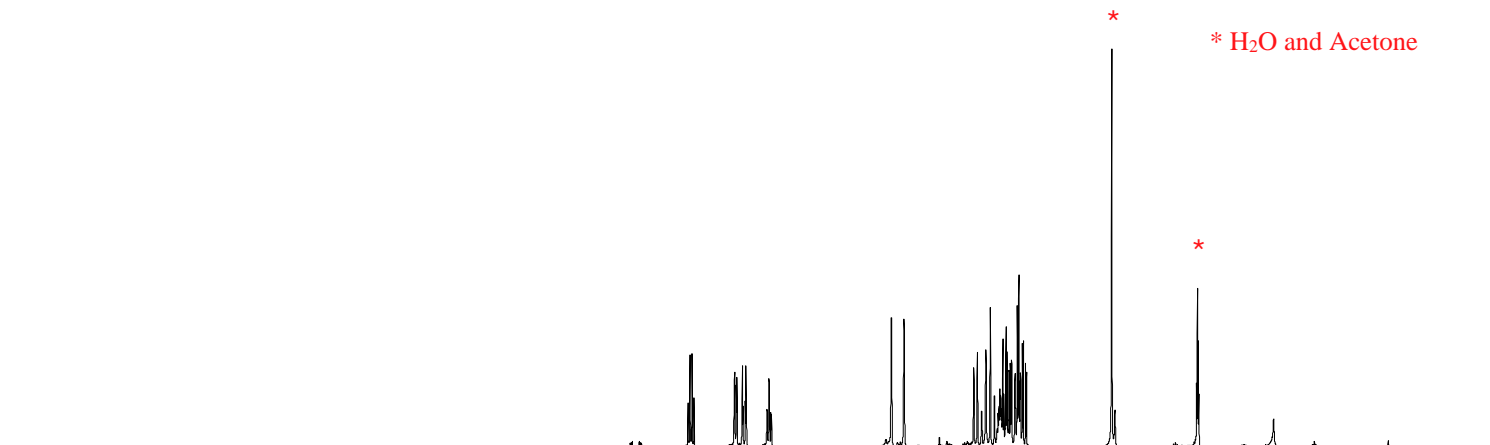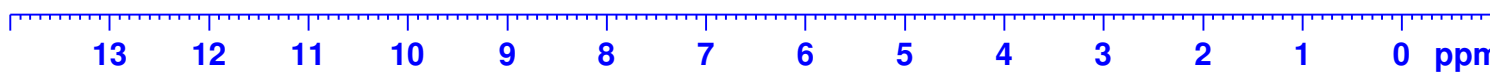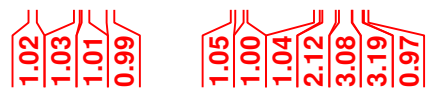

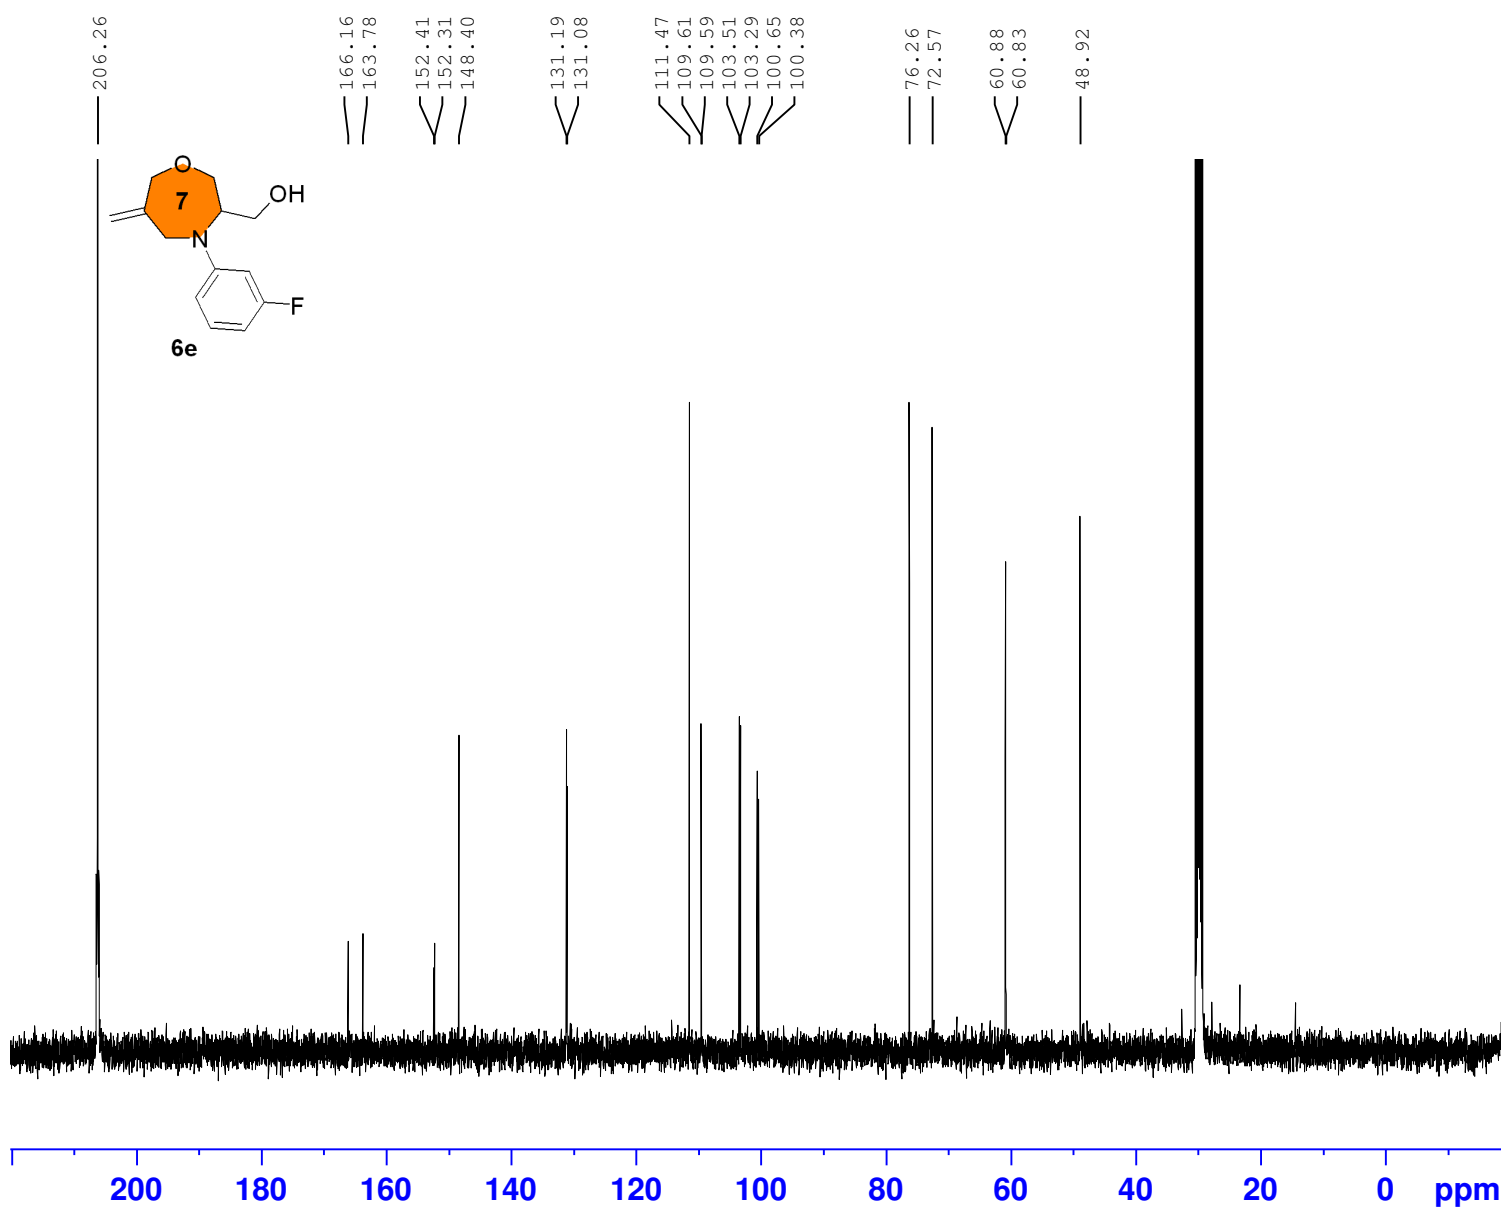

Current Data Parameters  
 NAME ljxnMR  
 EXPNO 57  
 PROCNO 1

F2 - Acquisition Parameters  
 Date\_ 20230422  
 Time 8.12  
 INSTRUM spect  
 PROBHD 5 mm PABBO BB-  
 PULPROG zgpg30  
 TD 65536  
 SOLVENT Acetone  
 NS 900  
 DS 4  
 SWH 24038.461 Hz  
 FIDRES 0.366798 Hz  
 AQ 1.3631488 sec  
 RG 193.13  
 DW 20.800 usec  
 DE 6.50 usec  
 TE 290.6 K  
 D1 2.00000000 sec  
 D11 0.03000000 sec  
 TD0 1

==== CHANNEL f1 =====  
 NUC1 13C  
 P1 12.00 usec  
 PLW1 53.00000000 W  
 SFO1 100.6379178 MHz

==== CHANNEL f2 =====  
 CPDPRG[2] waltz16  
 NUC2 1H  
 PCPD2 90.00 usec  
 PLW2 14.00000000 W  
 PLW12 0.37246999 W  
 PLW13 0.30170000 W  
 SFO2 400.1916008 MHz

F2 - Processing parameters  
 SI 32768  
 SF 100.6277688 MHz  
 WDW EM  
 SSB 0  
 LB 1.00 Hz  
 GB 0  
 PC 1.40

# <sup>19</sup>F NMR

LJX-3-65

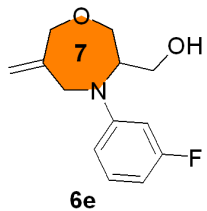

Current Data Parameters  
NAME 0927HH  
EXPNO 7  
PROCNO 1

F2 - Acquisition Parameters  
Date\_ 20230927  
Time 16.36 h  
INSTRUM Avance  
PROBHD z116098\_0833 (  
PULPROG zgig  
TD 131072  
SOLVENT Acetone  
NS 16  
DS 4  
SWH 90909.094 Hz  
FIDRES 1.387163 Hz  
AQ 0.7208960 sec  
RG 101  
DW 5.500 usec  
DE 6.50 usec  
TE 294.4 K  
D1 1.00000000 sec  
D11 0.03000000 sec  
TD0 1  
SFO1 376.4607164 MHz  
NUC1 19F  
P1 18.00 usec  
PLW1 16.73100090 W  
SFO2 400.1316005 MHz  
NUC2 1H  
CPDPRG[2] waltz16  
PCPD2 90.00 usec  
PLW2 20.73200035 W  
PLW12 0.25595000 W

F2 - Processing parameters  
SI 65536  
SF 376.4983662 MHz  
WDW EM  
SSB 0  
LB 0.30 Hz  
GB 0  
PC 1.00

-113.961

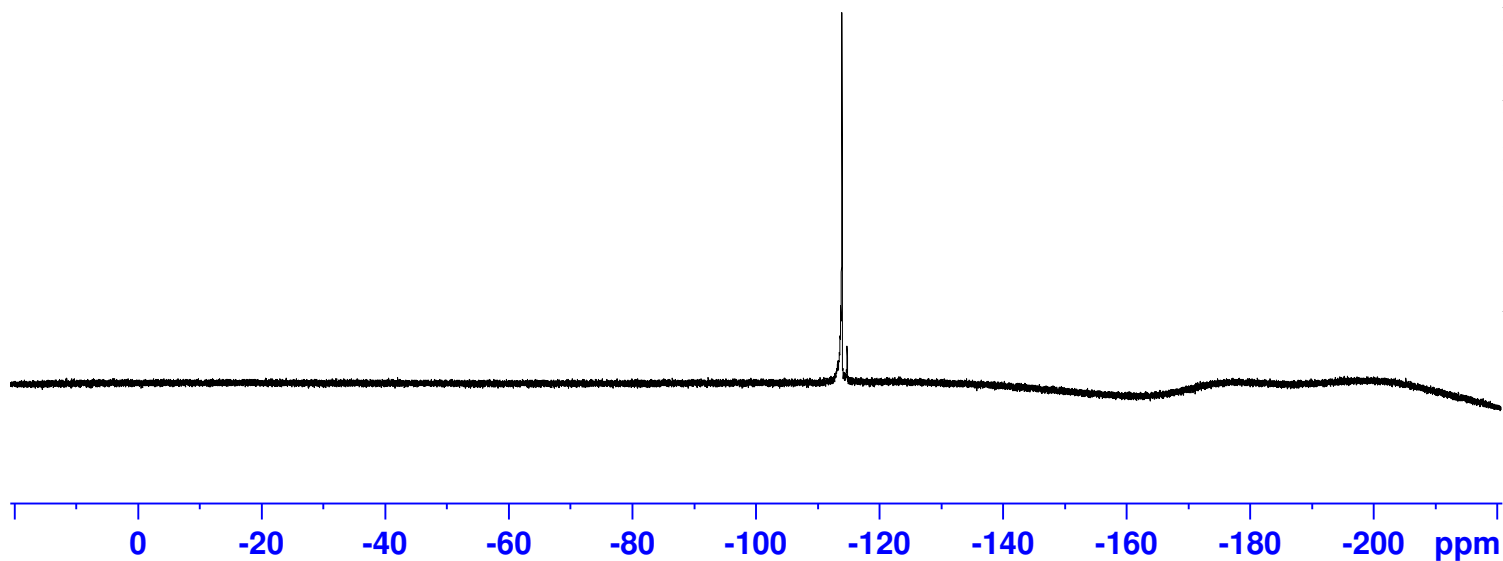

ljx-3-37

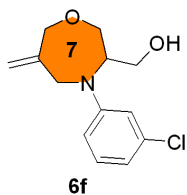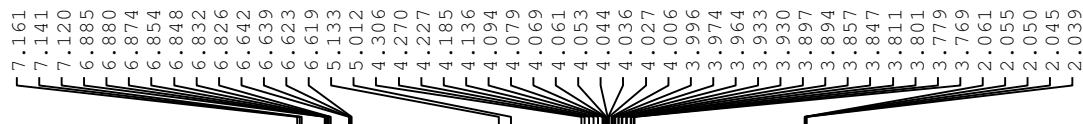

Current Data Parameters  
NAME 2023-9-27-400  
EXPNO 4  
PROCNO 1

F2 - Acquisition Parameters  
Date\_ 20230926  
Time 23.07  
INSTRUM spect  
PROBHD 5 mm PADUL 13C  
PULPROG zg30  
TD 65536  
SOLVENT Acetone  
NS 8  
DS 2  
SWH 8223.685 Hz  
FIDRES 0.125483 Hz  
AQ 3.9845889 sec  
RG 75.43  
DW 60.800 usec  
DE 6.50 usec  
TE 291.3 K  
D1 1.00000000 sec  
TD0 1

==== CHANNEL f1 =====  
NUC1 1H  
P1 9.90 usec  
PLW1 23.00000000 W  
SFO1 400.1924713 MHz

F2 - Processing parameters  
SI 65536  
SF 400.1900110 MHz  
WDW EM  
SSB 0  
LB 0.30 Hz  
GB 0  
PC 1.00

\* H<sub>2</sub>O and Acetone

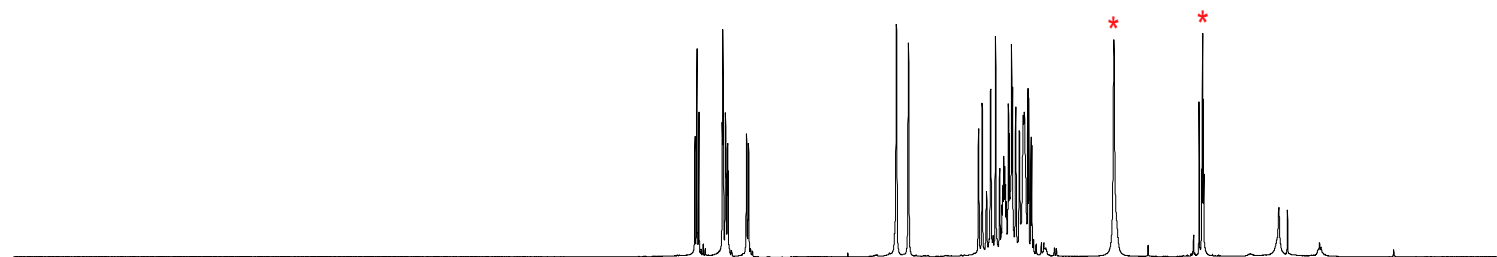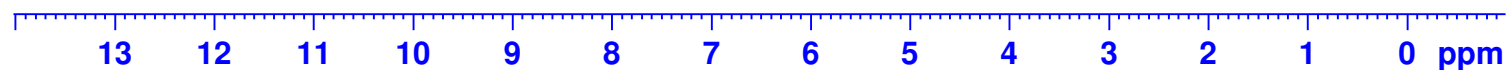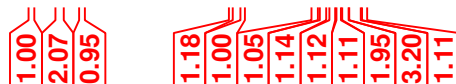

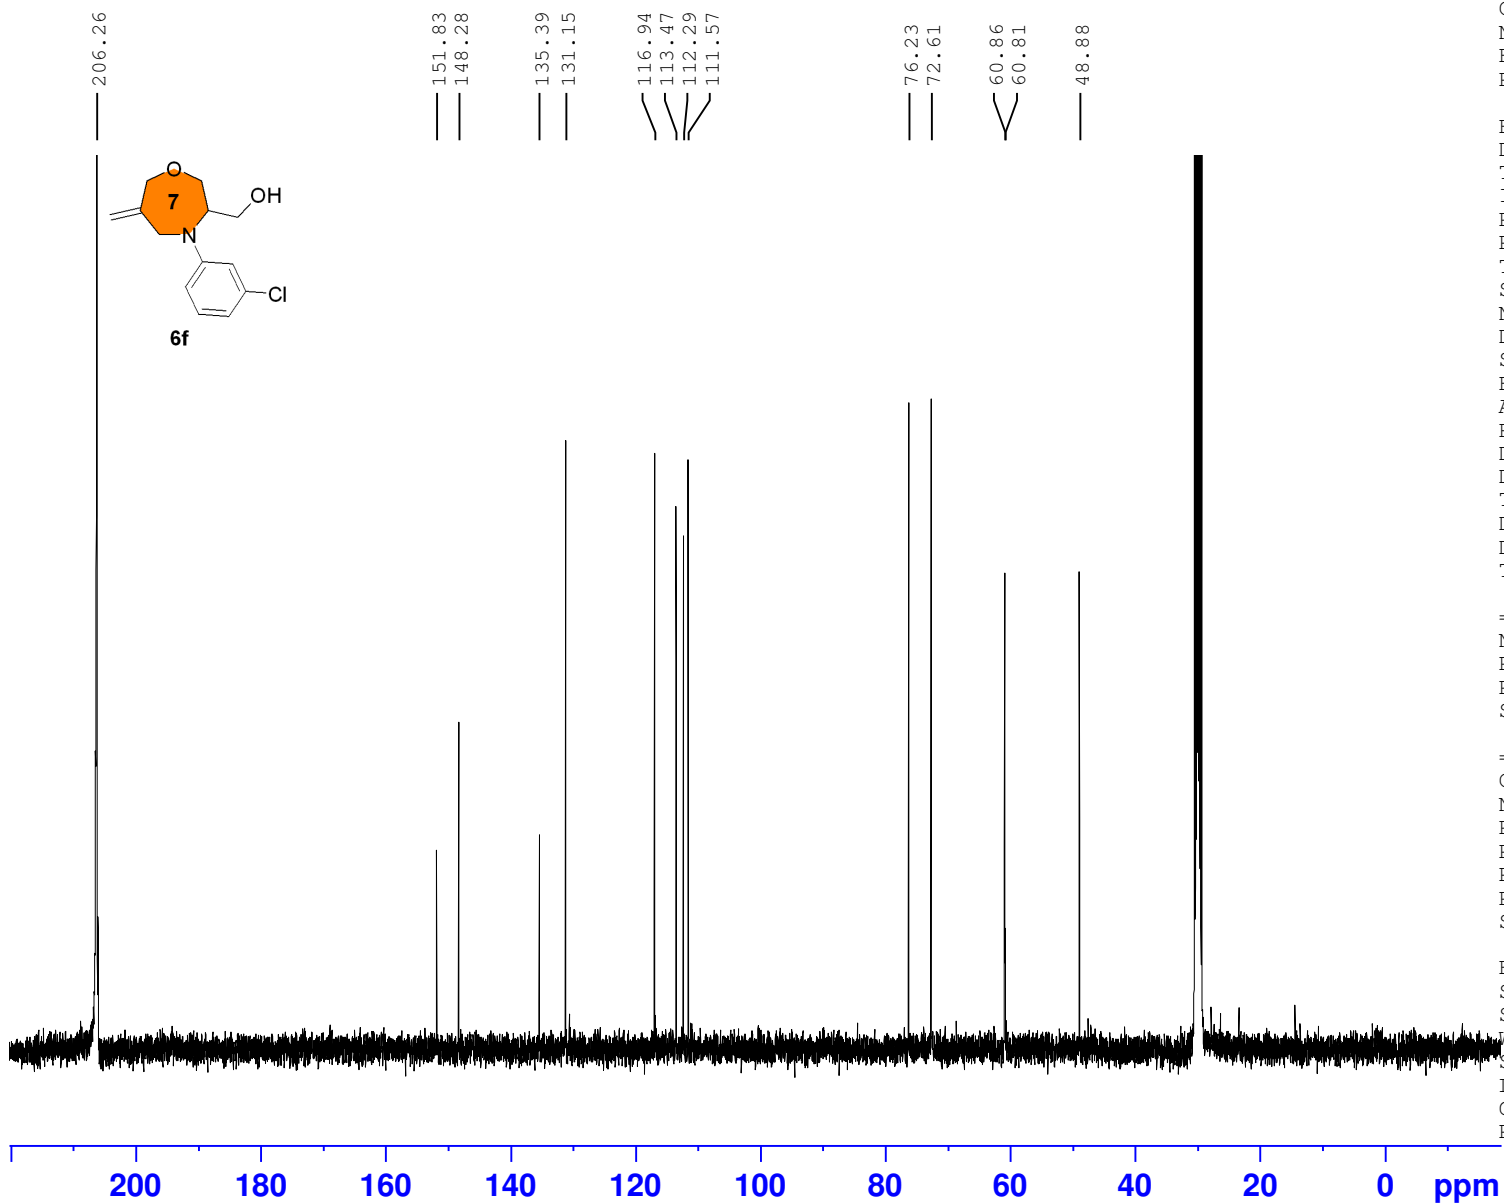

Current Data Parameters  
 NAME 2023.0507  
 EXPNO 10  
 PROCNO 1

F2 - Acquisition Parameters  
 Date\_ 20230507  
 Time 22.07  
 INSTRUM spect  
 PROBHD 5 mm PABBO BB-  
 PULPROG zgpg30  
 TD 65536  
 SOLVENT Acetone  
 NS 1000  
 DS 4  
 SWH 24038.461 Hz  
 FIDRES 0.366798 Hz  
 AQ 1.3631488 sec  
 RG 193.13  
 DW 20.800 usec  
 DE 6.50 usec  
 TE 291.9 K  
 D1 2.00000000 sec  
 D11 0.03000000 sec  
 TD0 1

==== CHANNEL f1 =====  
 NUC1 13C  
 P1 12.00 usec  
 PLW1 53.00000000 W  
 SFO1 100.6379178 MHz

==== CHANNEL f2 =====  
 CPDPRG[2] waltz16  
 NUC2 1H  
 PCPD2 90.00 usec  
 PLW2 14.00000000 W  
 PLW12 0.37246999 W  
 PLW13 0.30170000 W  
 SFO2 400.1916008 MHz

F2 - Processing parameters  
 SI 32768  
 SF 100.6277690 MHz  
 WDW EM  
 SSB 0  
 LB 1.00 Hz  
 GB 0  
 PC 1.40

ljx-3-100

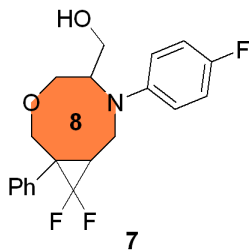

7.246  
7.231  
7.102  
7.084  
7.062  
7.051  
7.047  
7.041  
7.034  
4.225  
4.207  
4.191  
4.174  
4.155  
4.145  
4.138  
4.125  
4.117  
4.094  
4.086  
4.068  
4.045  
4.024  
4.010  
3.911  
3.894  
3.883  
3.867  
3.853  
3.841  
3.824  
3.736  
3.721  
3.710  
3.694  
3.645  
3.636  
3.619  
2.600  
2.589  
2.556  
2.527  
2.055  
2.050  
2.044

Current Data Parameters  
NAME 2023-5-27-400  
EXPNO 30  
PROCNO 1

F2 - Acquisition Parameters  
Date\_ 20230527  
Time 2.15  
INSTRUM spect  
PROBHD 5 mm PABBO BB-  
PULPROG zg30  
TD 65536  
SOLVENT Acetone  
NS 8  
DS 2  
SWH 8223.685 Hz  
FIDRES 0.125483 Hz  
AQ 3.9845889 sec  
RG 100.49  
DW 60.800 usec  
DE 6.50 usec  
TE 292.4 K  
D1 1.00000000 sec  
TD0 1

==== CHANNEL f1 =====  
NUC1 1H  
P1 14.68 usec  
PLW1 14.00000000 W  
SFO1 400.1924713 MHz

F2 - Processing parameters  
SI 65536  
SF 400.1900128 MHz  
WDW EM  
SSB 0  
LB 0.30 Hz  
GB 0  
PC 1.00

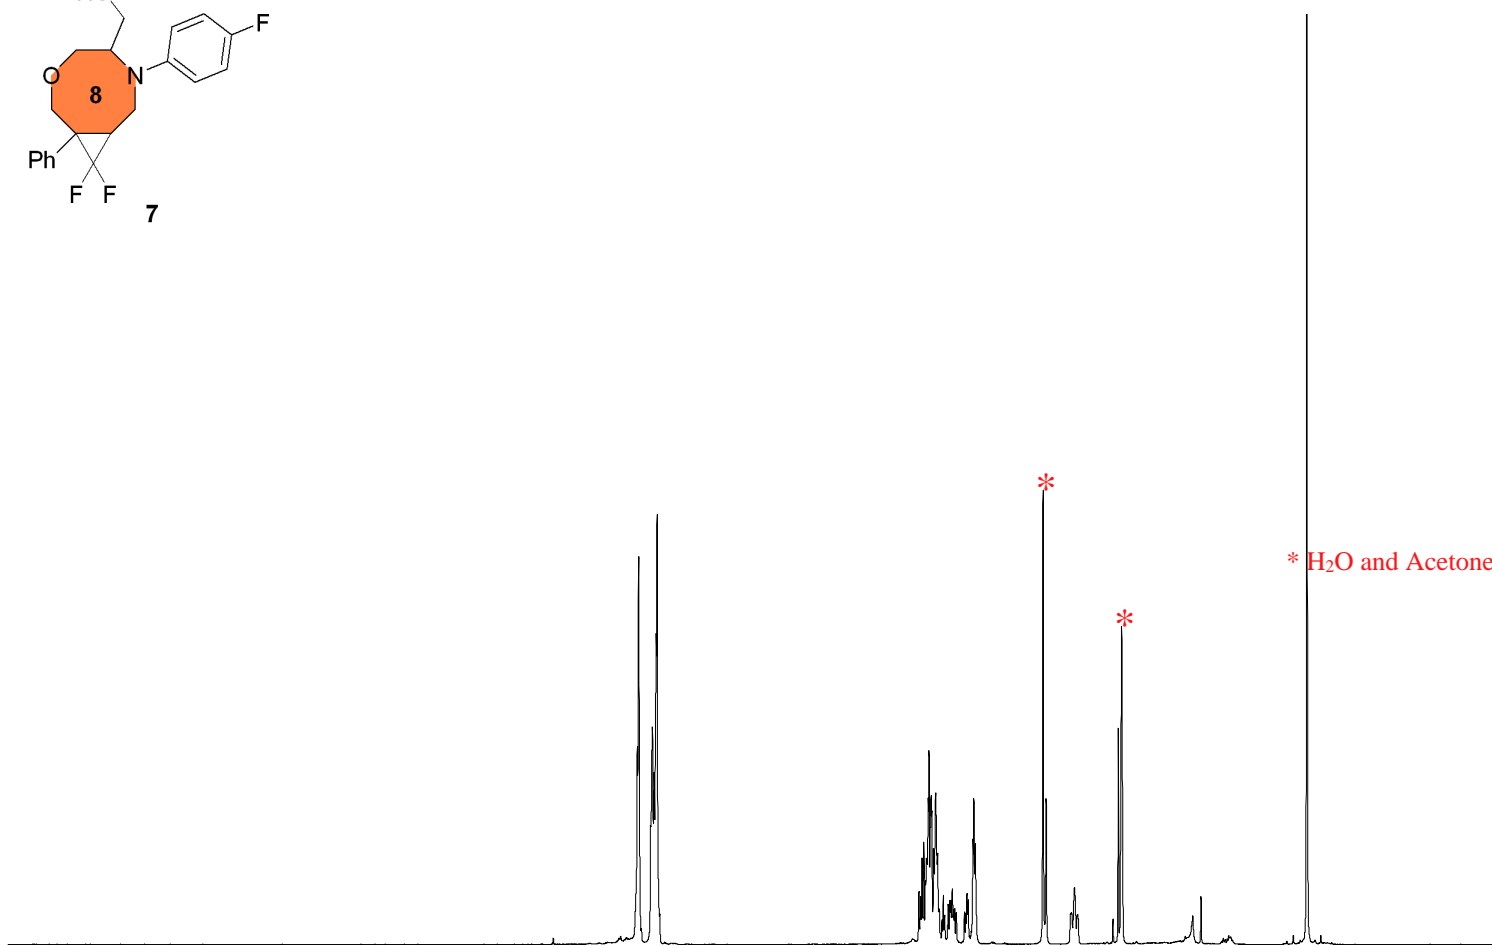

13 12 11 10 9 8 7 6 5 4 3 2 1 0 ppm

9.00  
1.05  
5.02  
1.09  
2.02  
1.03

ljx-3-100

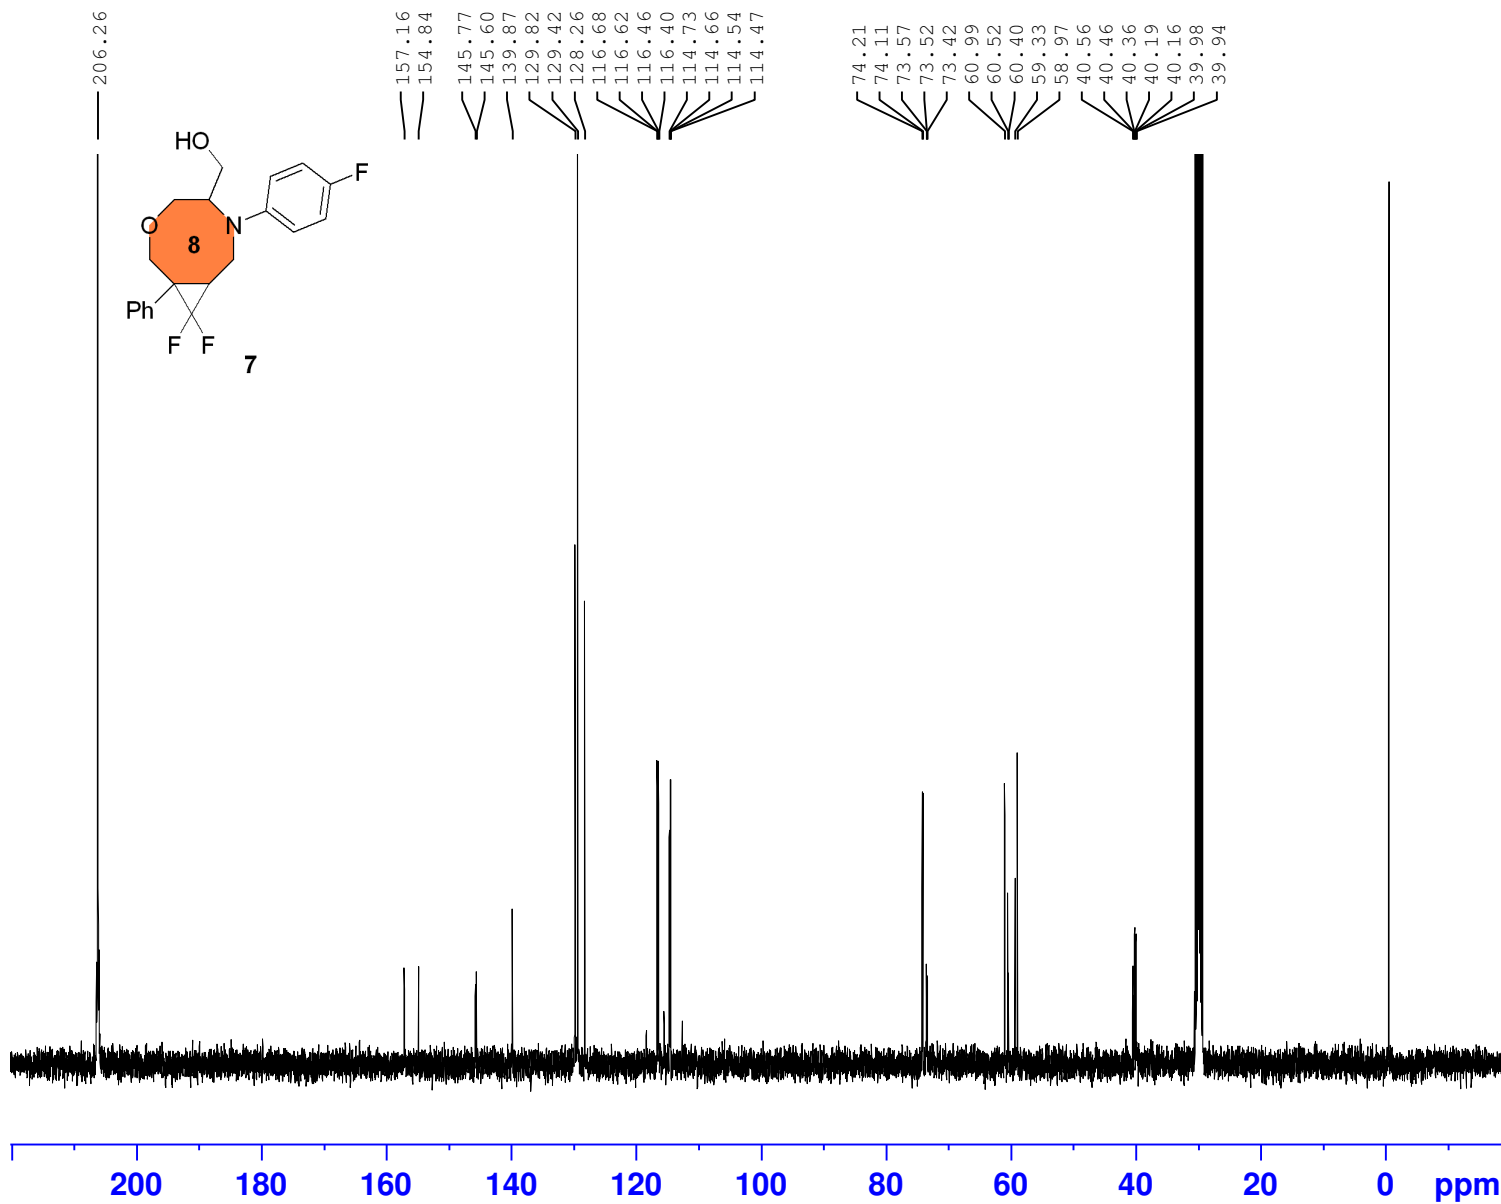

Current Data Parameters  
NAME 2023-5-27-400  
EXPNO 31  
PROCNO 1

F2 - Acquisition Parameters  
Date\_ 20230527  
Time 2.39  
INSTRUM spect  
PROBHD 5 mm PABBO BB-  
PULPROG zgpg30  
TD 65536  
SOLVENT Acetone  
NS 400  
DS 4  
SWH 24038.461 Hz  
FIDRES 0.366798 Hz  
AQ 1.3631488 sec  
RG 193.13  
DW 20.800 usec  
DE 6.50 usec  
TE 293.0 K  
D1 2.00000000 sec  
D11 0.03000000 sec  
TD0 1

==== CHANNEL f1 =====  
NUC1 13C  
P1 12.00 usec  
PLW1 53.00000000 W  
SFO1 100.6379178 MHz

==== CHANNEL f2 =====  
CPDPRG[2] waltz16  
NUC2 1H  
PCPD2 90.00 usec  
PLW2 14.00000000 W  
PLW12 0.37246999 W  
PLW13 0.30170000 W  
SFO2 400.1916008 MHz

F2 - Processing parameters  
SI 32768  
SF 100.6277670 MHz  
WDW EM  
SSB 0  
LB 1.00 Hz  
GB 0  
PC 1.40



# <sup>19</sup>F NMR

ljx-3-100

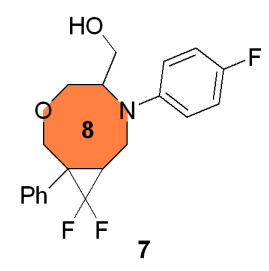

-127.40  
-127.41  
-127.94  
-127.96  
-130.84  
-130.87  
-143.80  
-143.90  
-144.35  
-144.44

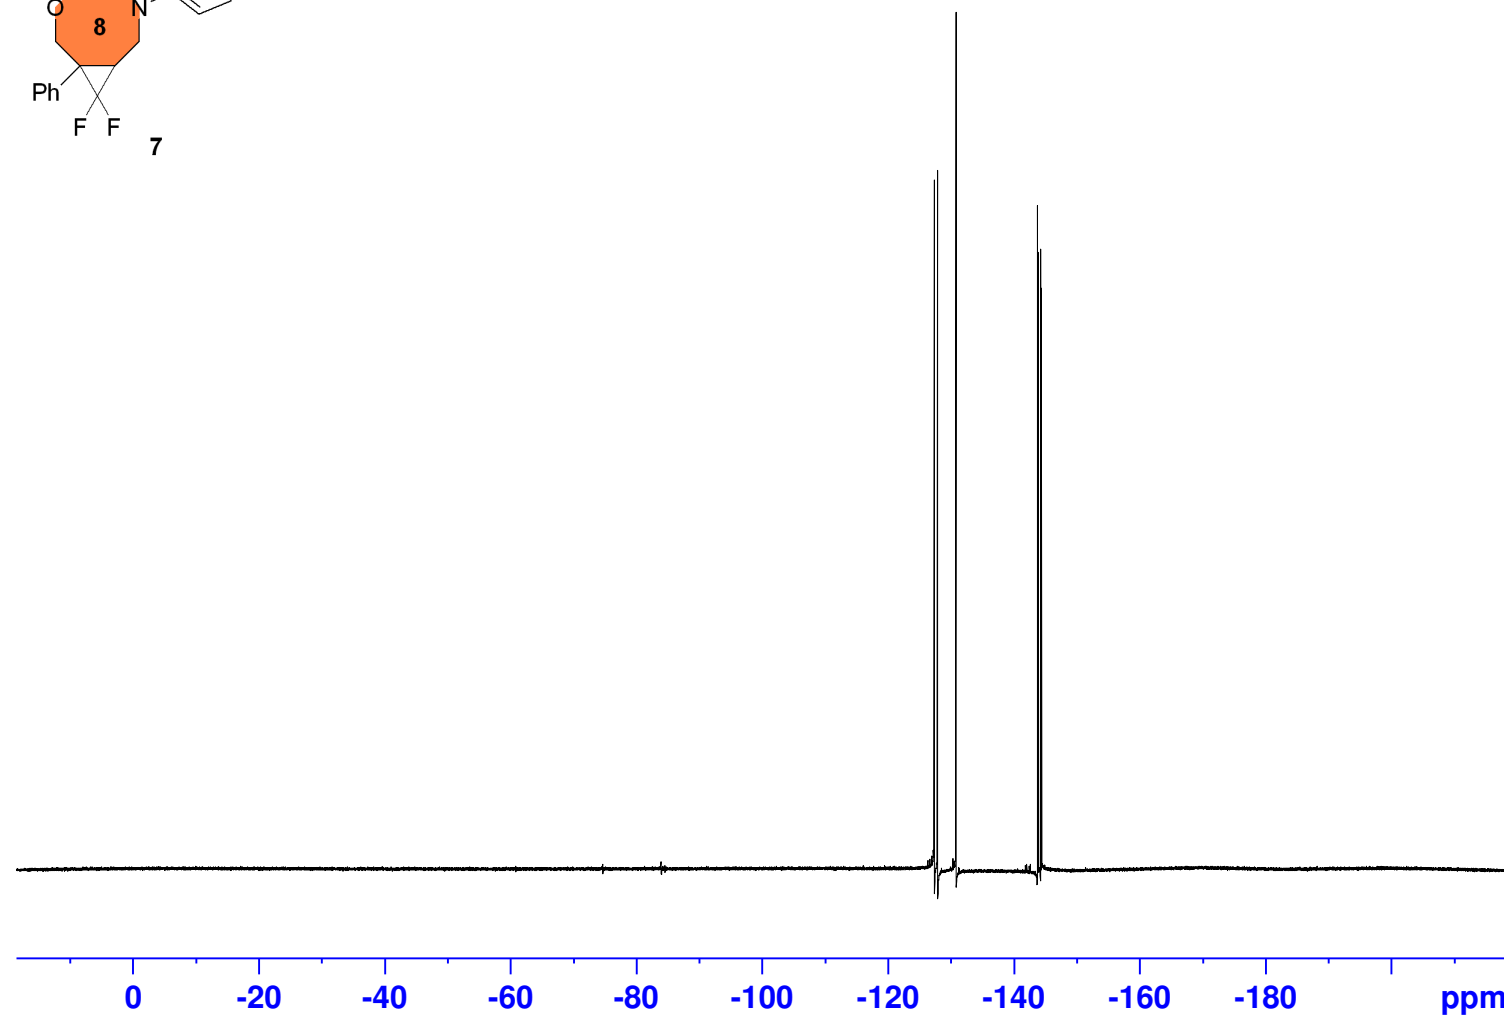

Current Data Parameters  
NAME 20230531-300M  
EXPNO 93  
PROCNO 1

F2 - Acquisition Parameters  
Date\_ 20230531  
Time 13.51  
INSTRUM spect  
PROBHD 5 mm PABBO BB-  
PULPROG zgfhigqn.2  
TD 131072  
SOLVENT Acetone  
NS 16  
DS 4  
SWH 66964.289 Hz  
FIDRES 0.510897 Hz  
AQ 0.9786710 sec  
RG 203  
DW 7.467 usec  
DE 6.50 usec  
TE 296.7 K  
D1 1.00000000 sec  
D11 0.03000000 sec  
D12 0.00002000 sec  
TD0 1

==== CHANNEL f1 =====  
SFO1 282.3761148 MHz  
NUC1 19F  
P1 14.50 usec  
PLW1 10.399999962 W

==== CHANNEL f2 =====  
SFO2 300.1312005 MHz  
NUC2 1H  
CPDPRG[2] waltz16  
PCPD2 90.00 usec  
PLW2 14.00000000 W  
PLW12 0.17284000 W

F2 - Processing parameters  
SI 65536  
SF 282.4043552 MHz  
WDW EM  
SSB 0  
LB 0.30 Hz  
GB 0  
PC 1.00

ljx-4-39

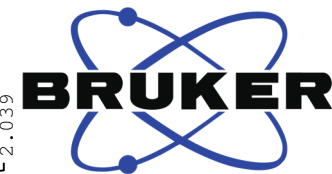

7.842  
7.835  
7.831  
7.825  
7.819  
7.810  
7.804  
7.798  
7.794  
7.788  
7.788  
7.735  
7.731  
7.714  
7.707  
7.293  
7.288  
7.286  
7.272  
7.265  
7.259  
7.257  
7.255  
7.250  
6.845  
6.829  
6.808  
6.367  
6.351  
6.335  
4.813  
4.796  
4.770  
4.753  
4.697  
4.658  
4.516  
4.477  
4.302  
4.296  
4.212  
4.200  
4.181  
4.169  
4.127  
4.105  
4.092  
4.070  
3.918  
3.902  
3.889  
3.883  
3.874  
3.867  
3.853  
3.846  
3.831  
3.787  
3.781  
3.756  
3.750  
2.086  
2.061  
2.055  
2.050  
2.044  
2.039

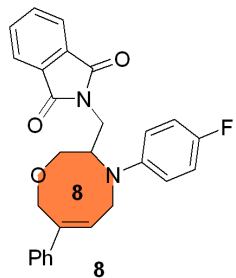

Current Data Parameters  
 NAME 2023-9-19-400  
 EXPNO 27  
 PROCNO 1

F2 - Acquisition Parameters  
 Date\_ 20230918  
 Time 23.26  
 INSTRUM spect  
 PROBHD 5 mm PADUL 13C  
 PULPROG zg30  
 TD 65536  
 SOLVENT Acetone  
 NS 8  
 DS 2  
 SWH 8223.685 Hz  
 FIDRES 0.125483 Hz  
 AQ 3.9845889 sec  
 RG 68.24  
 DW 60.800 usec  
 DE 6.50 usec  
 TE 289.9 K  
 D1 1.00000000 sec  
 TD0 1

==== CHANNEL f1 =====  
 NUC1 1H  
 P1 9.90 usec  
 PLW1 23.00000000 W  
 SFO1 400.1924713 MHz

F2 - Processing parameters  
 SI 65536  
 SF 400.1900112 MHz  
 WDW EM  
 SSB 0  
 LB 0.30 Hz  
 GB 0  
 PC 1.00

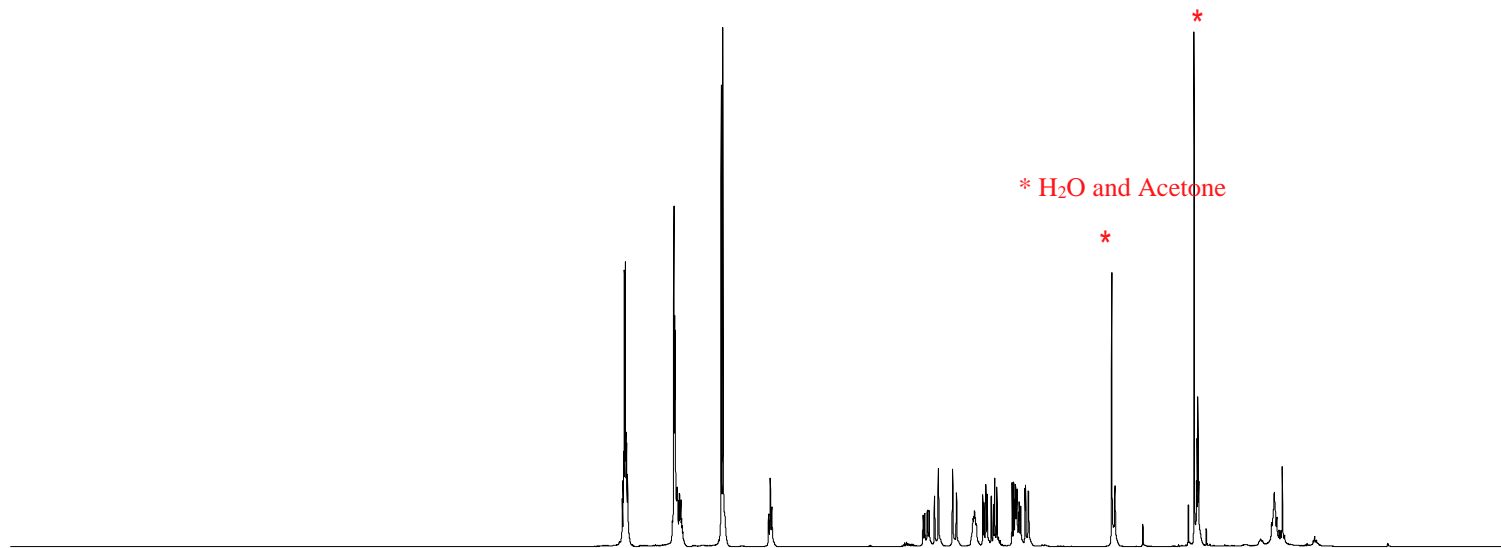

13 12 11 10 9 8 7 6 5 4 3 2 1 0 ppm

4.10  
5.29  
4.03  
1.00  
1.09  
1.04  
1.07  
2.29  
2.21  
1.00

ljx-4-39

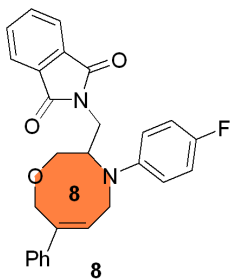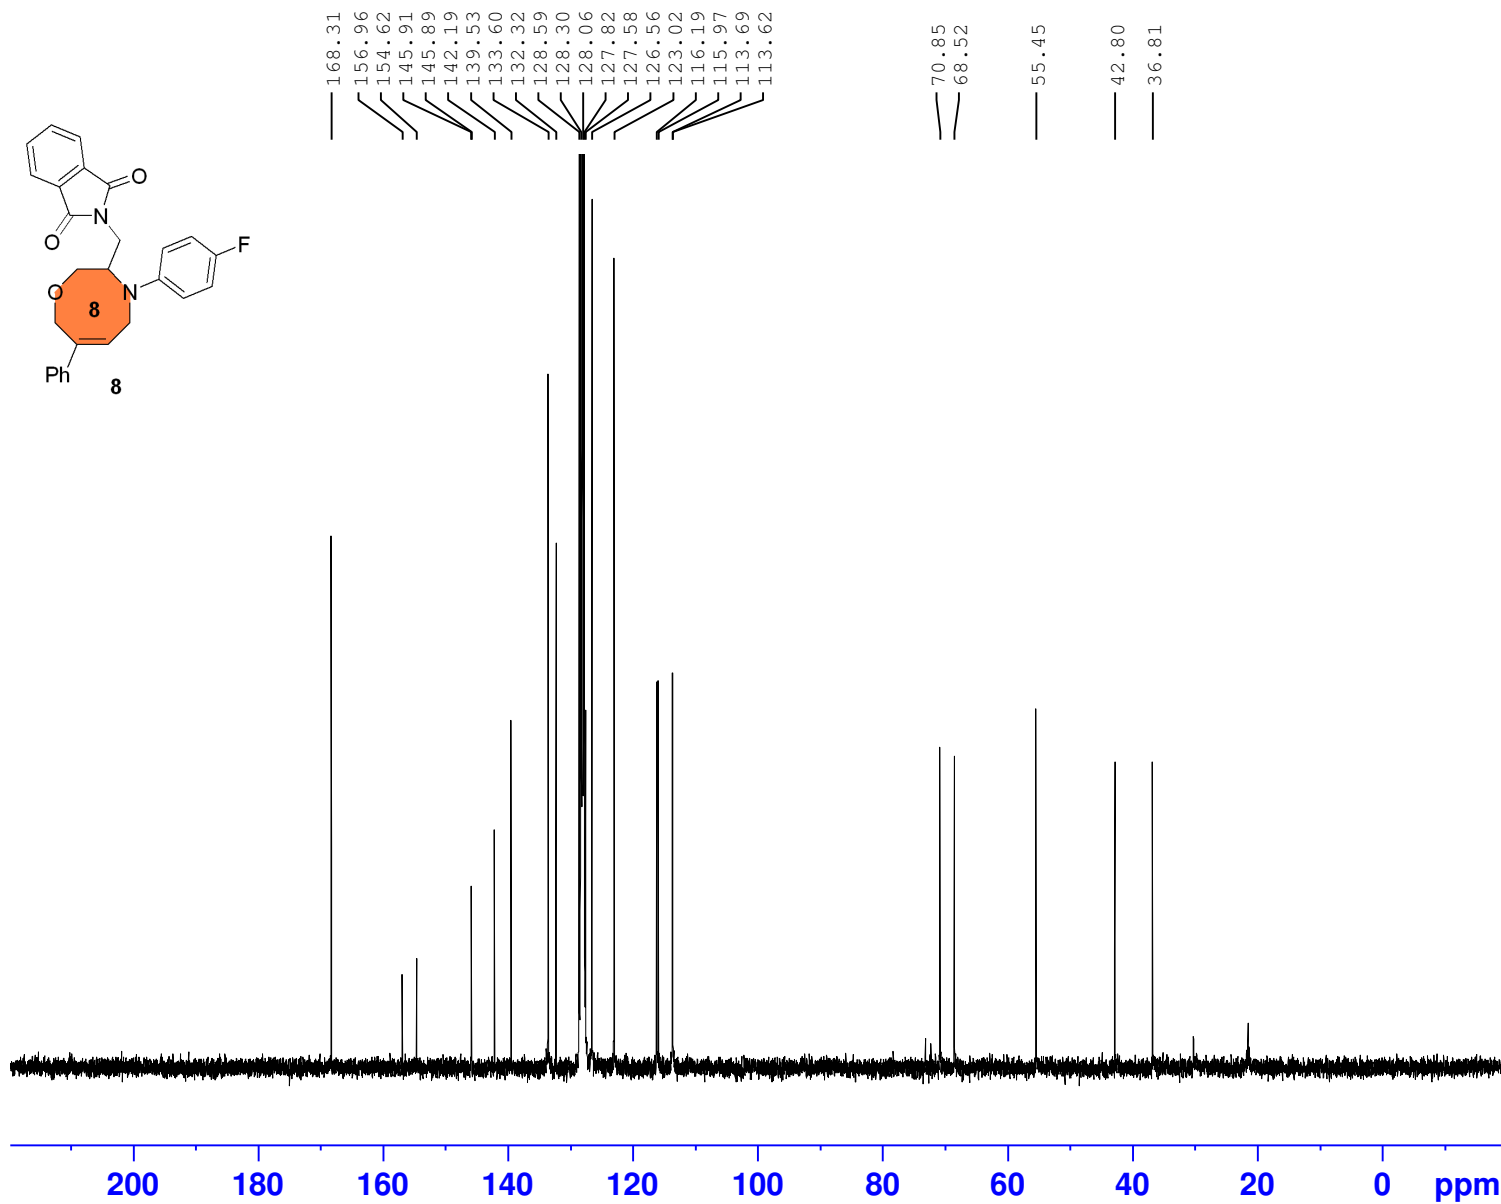

Current Data Parameters  
NAME 20230701-400m  
EXPNO 49  
PROCNO 1

F2 - Acquisition Parameters  
Date\_ 20230701  
Time 2.58  
INSTRUM spect  
PROBHD 5 mm PADUL 13C  
PULPROG zgpg30  
TD 65536  
SOLVENT C6D6  
NS 500  
DS 4  
SWH 24038.461 Hz  
FIDRES 0.366798 Hz  
AQ 1.3631488 sec  
RG 37.77  
DW 20.800 usec  
DE 6.50 usec  
TE 292.6 K  
D1 2.00000000 sec  
D11 0.03000000 sec  
TD0 1

==== CHANNEL f1 =====  
NUC1 13C  
P1 9.80 usec  
PLW1 47.40000153 W  
SFO1 100.6379178 MHz

==== CHANNEL f2 =====  
CPDPRG[2] waltz16  
NUC2 1H  
PCPD2 90.00 usec  
PLW2 23.00000000 W  
PLW12 0.30712000 W  
PLW13 0.24877000 W  
SFO2 400.1916008 MHz

F2 - Processing parameters  
SI 32768  
SF 100.6278215 MHz  
WDW EM  
SSB 0  
LB 1.00 Hz  
GB 0  
PC 1.40

# <sup>19</sup>F NMR

LJX-4-39

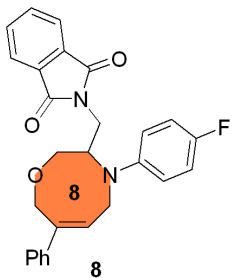

Current Data Parameters  
NAME 0927HH  
EXPNO 2  
PROCNO 1

F2 - Acquisition Parameters  
Date\_ 20230927  
Time 15.59 h  
INSTRUM Avance  
PROBHD z116098\_0833 (  
PULPROG zgig  
TD 131072  
SOLVENT CDC13  
NS 16  
DS 4  
SWH 90909.094 Hz  
FIDRES 1.387163 Hz  
AQ 0.7208960 sec  
RG 101  
DW 5.500 usec  
DE 6.50 usec  
TE 294.4 K  
D1 1.00000000 sec  
D11 0.03000000 sec  
TD0 1  
SFO1 376.4607164 MHz  
NUC1 19F  
P1 18.00 usec  
PLW1 16.73100090 W  
SFO2 400.1316005 MHz  
NUC2 1H  
CPDPRG[2] waltz16  
PCPD2 90.00 usec  
PLW2 20.73200035 W  
PLW12 0.25595000 W

F2 - Processing parameters  
SI 65536  
SF 376.4983662 MHz  
WDW EM  
SSB 0  
LB 0.30 Hz  
GB 0  
PC 1.00

-128.89

0 -20 -40 -60 -80 -100 -120 -140 -160 -180 -200 ppm

ljx-3-92-1

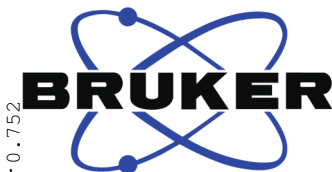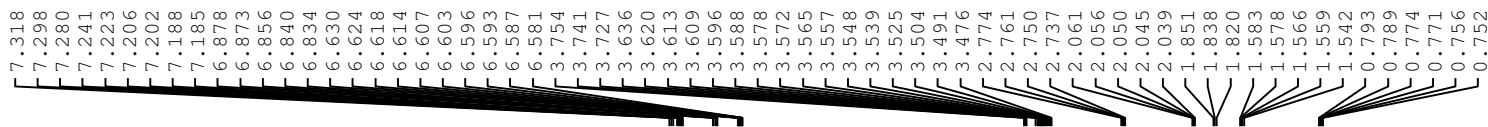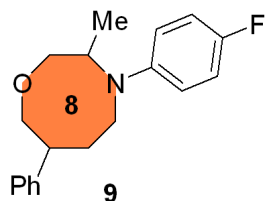

Current Data Parameters
NAME 2023-9-19-400
EXPNO 25
PROCNO 1

F2 - Acquisition Parameters
Date\_ 20230918
Time 23.18
INSTRUM spect
PROBHD 5 mm PADUL 13C
PULPROG zg30
TD 65536
SOLVENT Acetone
NS 8
DS 2
SWH 8223.685 Hz
FIDRES 0.125483 Hz
AQ 3.9845889 sec
RG 61.19
DW 60.800 usec
DE 6.50 usec
TE 289.9 K
D1 1.00000000 sec
TD0 1

\* H2O and Acetone

==== CHANNEL f1 =====
NUC1 1H
P1 9.90 usec
PLW1 23.00000000 W
SFO1 400.1924713 MHz

F2 - Processing parameters
SI 65536
SF 400.1900110 MHz
WDW EM
SSB 0
LB 0.30 Hz
GB 0
PC 1.00

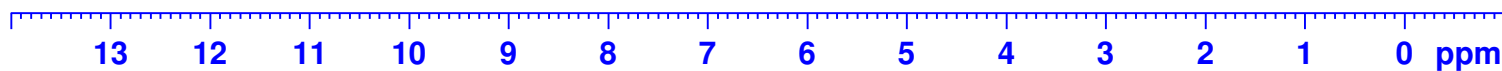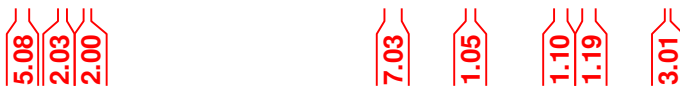

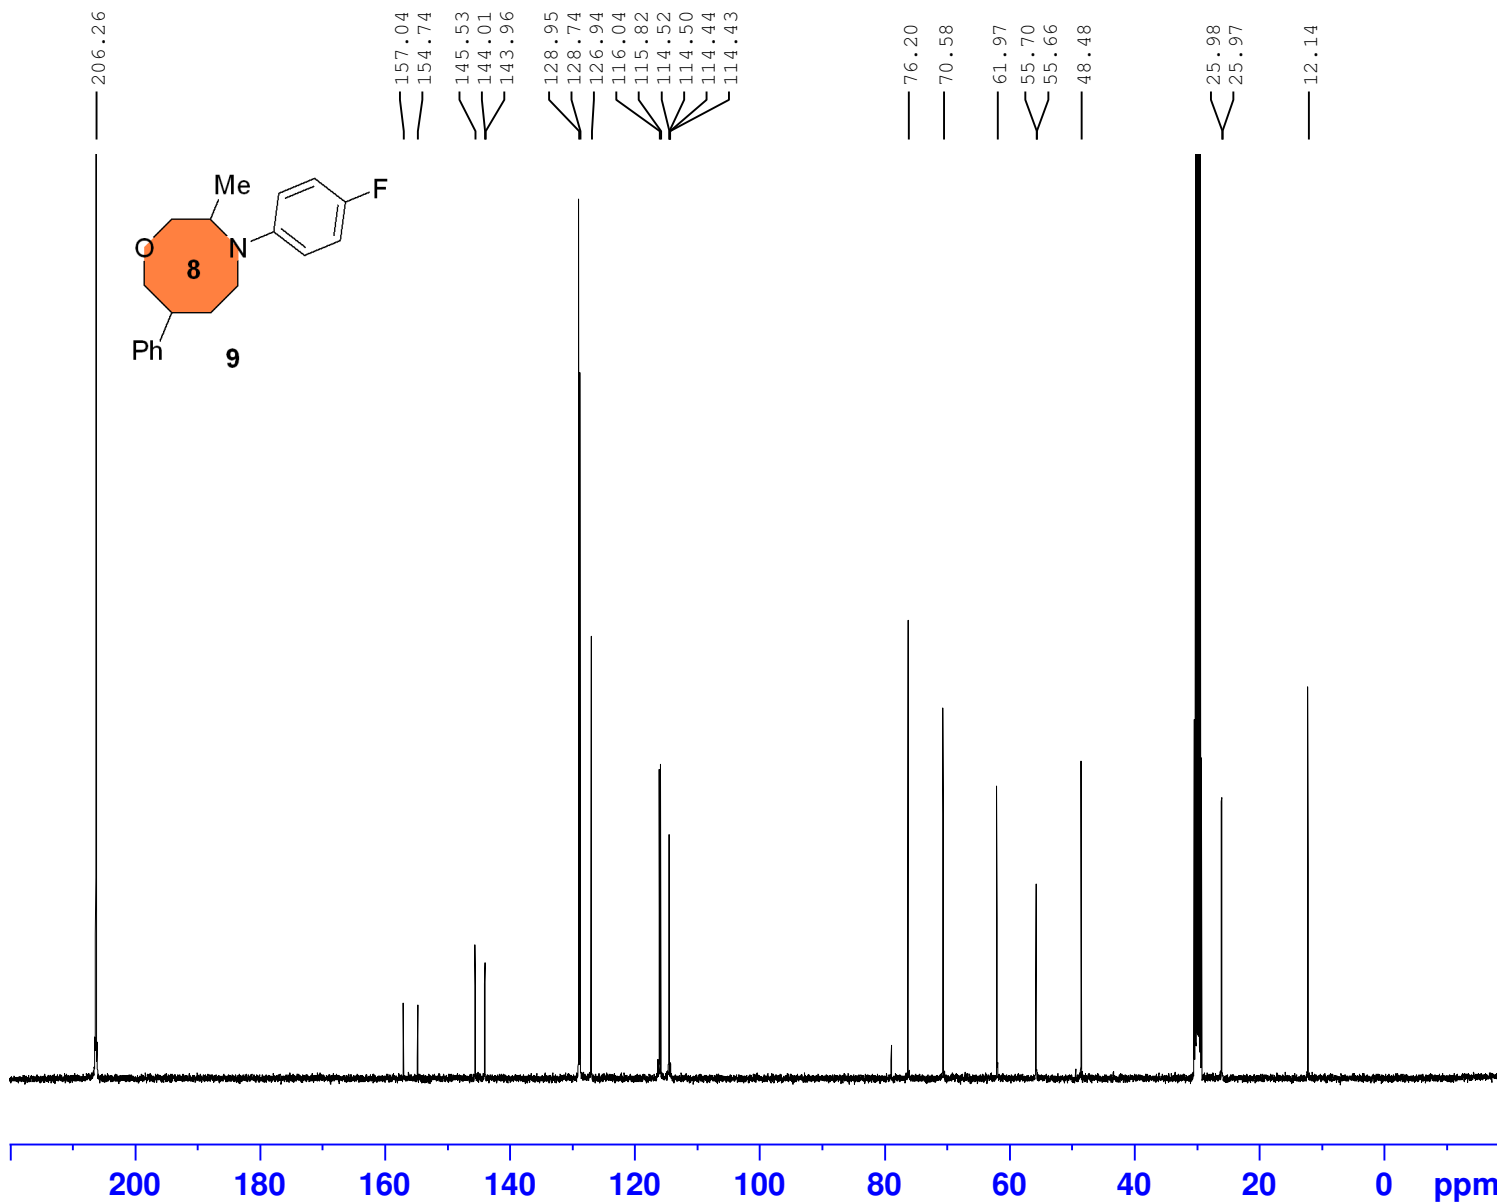

Current Data Parameters  
 NAME 92-93  
 EXPNO 92  
 PROCNO 1

F2 - Acquisition Parameters  
 Date\_ 20230522  
 Time 0.34  
 INSTRUM spect  
 PROBHD 5 mm PABBO BB-  
 PULPROG zgpg30  
 TD 65536  
 SOLVENT Acetone  
 NS 800  
 DS 4  
 SWH 24038.461 Hz  
 FIDRES 0.366798 Hz  
 AQ 1.3631488 sec  
 RG 193.13  
 DW 20.800 usec  
 DE 6.50 usec  
 TE 289.0 K  
 D1 2.00000000 sec  
 D11 0.03000000 sec  
 TD0 1

==== CHANNEL f1 =====  
 NUC1 13C  
 P1 12.00 usec  
 PLW1 53.00000000 W  
 SFO1 100.6379178 MHz

==== CHANNEL f2 =====  
 CPDPRG[2] waltz16  
 NUC2 1H  
 PCPD2 90.00 usec  
 PLW2 14.00000000 W  
 PLW12 0.37246999 W  
 PLW13 0.30170000 W  
 SFO2 400.1916008 MHz

F2 - Processing parameters  
 SI 32768  
 SF 100.6277826 MHz  
 WDW EM  
 SSB 0  
 LB 1.00 Hz  
 GB 0  
 PC 1.40

# <sup>19</sup>F NMR

LJX-3-92-1

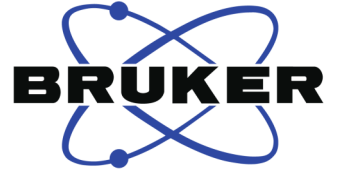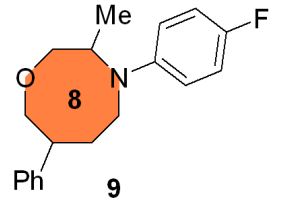

-127.12  
-127.20

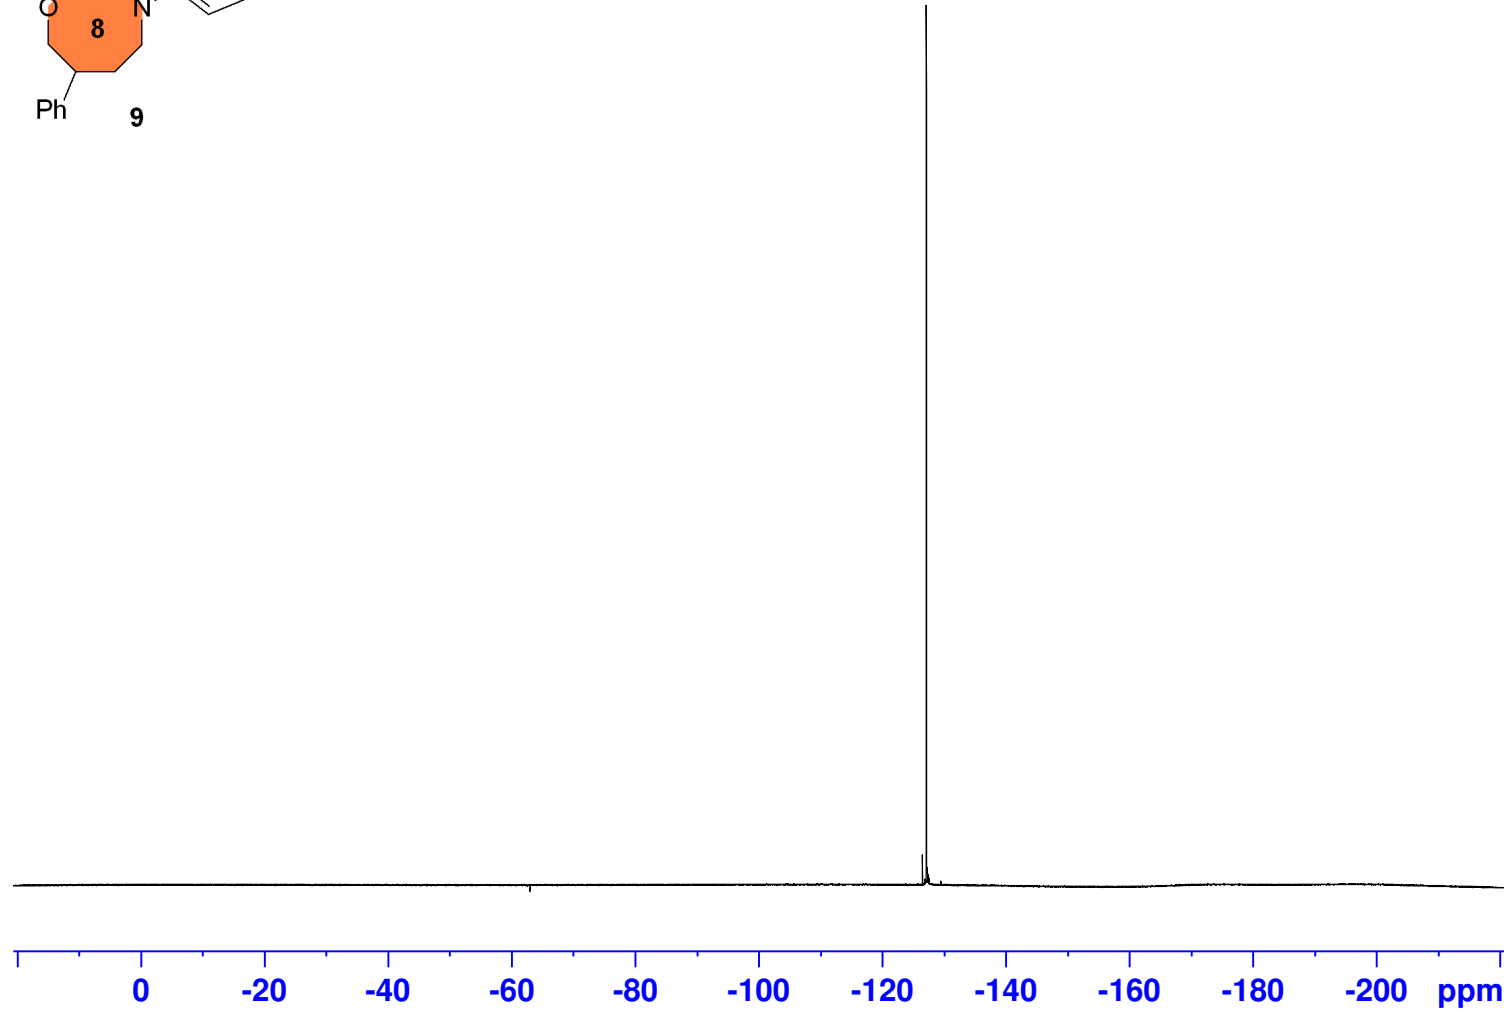

Current Data Parameters  
NAME 0927HH  
EXPNO 3  
PROCNO 1

F2 - Acquisition Parameters  
Date\_ 20230927  
Time 16.05 h  
INSTRUM Avance  
PROBHD z116098\_0833 (  
PULPROG zgig  
TD 131072  
SOLVENT CDC13  
NS 16  
DS 4  
SWH 90909.094 Hz  
FIDRES 1.387163 Hz  
AQ 0.7208960 sec  
RG 101  
DW 5.500 usec  
DE 6.50 usec  
TE 294.5 K  
D1 1.00000000 sec  
D11 0.03000000 sec  
TD0 1  
SFO1 376.4607164 MHz  
NUC1 19F  
P1 18.00 usec  
PLW1 16.73100090 W  
SFO2 400.1316005 MHz  
NUC2 1H  
CPDPRG[2] waltz16  
PCPD2 90.00 usec  
PLW2 20.73200035 W  
PLW12 0.25595000 W

F2 - Processing parameters  
SI 65536  
SF 376.4983662 MHz  
WDW EM  
SSB 0  
LB 0.30 Hz  
GB 0  
PC 1.00

ljx-4-18

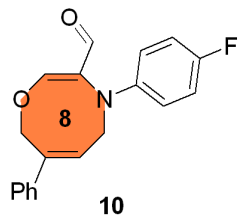

9.415  
7.733  
7.449  
7.445  
7.440  
7.430  
7.427  
7.425  
7.419  
7.389  
7.387  
7.382  
7.369  
7.365  
7.353  
7.350  
7.312  
7.309  
7.306  
7.297  
7.291  
7.285  
7.276  
7.273  
7.270  
7.270  
6.999  
6.992  
6.987  
6.981  
6.976  
6.971  
6.966  
6.960  
6.954  
6.771  
6.761  
6.755  
6.750  
6.744  
6.738  
6.733  
6.727  
6.330  
6.321  
6.313  
5.234  
4.460  
4.451  
2.061  
2.055  
2.050  
2.044  
2.039

Current Data Parameters  
NAME 20230610-400  
EXPNO 12  
PROCNO 1

F2 - Acquisition Parameters  
Date\_ 20230609  
Time 23.07  
INSTRUM spect  
PROBHD 5 mm PADUL 13C  
PULPROG zg30  
TD 65536  
SOLVENT Acetone  
NS 6  
DS 0  
SWH 8223.685 Hz  
FIDRES 0.125483 Hz  
AQ 3.9845889 sec  
RG 100.49  
DW 60.800 usec  
DE 6.50 usec  
TE 291.4 K  
D1 1.00000000 sec  
TD0 1

\* H<sub>2</sub>O and Acetone

==== CHANNEL f1 =====  
NUC1 1H  
P1 9.90 usec  
PLW1 23.00000000 W  
SFO1 400.1924713 MHz

F2 - Processing parameters  
SI 65536  
SF 400.1900111 MHz  
WDW EM  
SSB 0  
LB 0.30 Hz  
GB 0  
PC 1.00

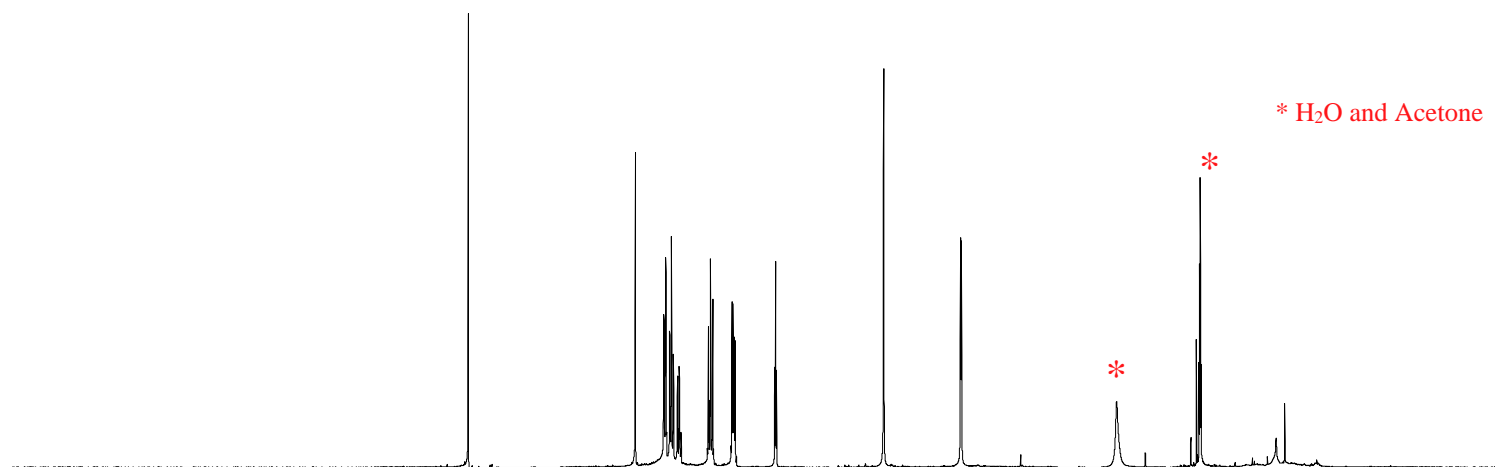

13 12 11 10 9 8 7 6 5 4 3 2 1 0 ppm

1.04  
1.01  
2.08  
2.10  
1.10  
2.16  
2.06  
1.00  
2.08  
2.02



ljx-4-18

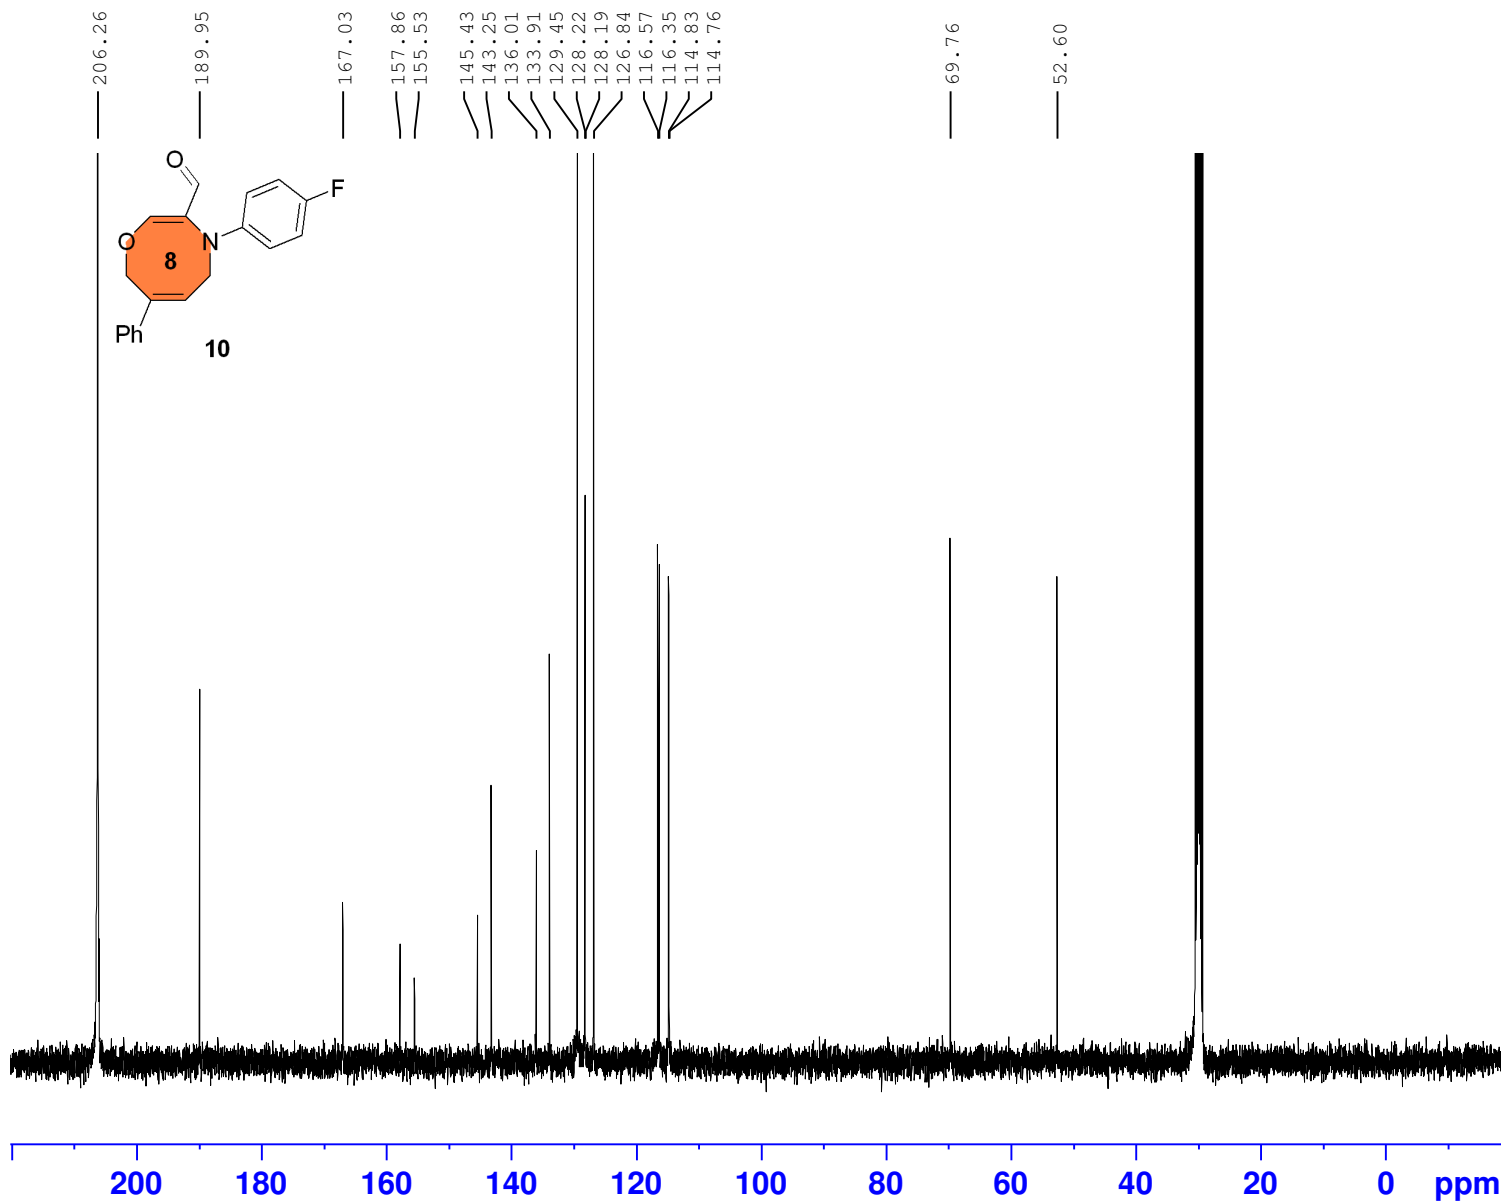

Current Data Parameters  
NAME 20230614-400M  
EXPNO 46  
PROCNO 1

F2 - Acquisition Parameters  
Date\_ 20230614  
Time 6.24  
INSTRUM spect  
PROBHD 5 mm PADUL 13C  
PULPROG zgpg30  
TD 65536  
SOLVENT Acetone  
NS 500  
DS 4  
SWH 24038.461 Hz  
FIDRES 0.366798 Hz  
AQ 1.3631488 sec  
RG 44.2  
DW 20.800 usec  
DE 6.50 usec  
TE 294.5 K  
D1 2.00000000 sec  
D11 0.03000000 sec  
TD0 1

==== CHANNEL f1 =====  
NUC1 13C  
P1 9.80 usec  
PLW1 47.40000153 W  
SFO1 100.6379178 MHz

==== CHANNEL f2 =====  
CPDPRG[2] waltz16  
NUC2 1H  
PCPD2 90.00 usec  
PLW2 23.00000000 W  
PLW12 0.30712000 W  
PLW13 0.24877000 W  
SFO2 400.1916008 MHz

F2 - Processing parameters  
SI 32768  
SF 100.6277664 MHz  
WDW EM  
SSB 0  
LB 1.00 Hz  
GB 0  
PC 1.40

# <sup>19</sup>F NMR

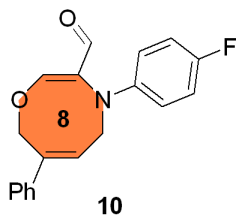

-127.62

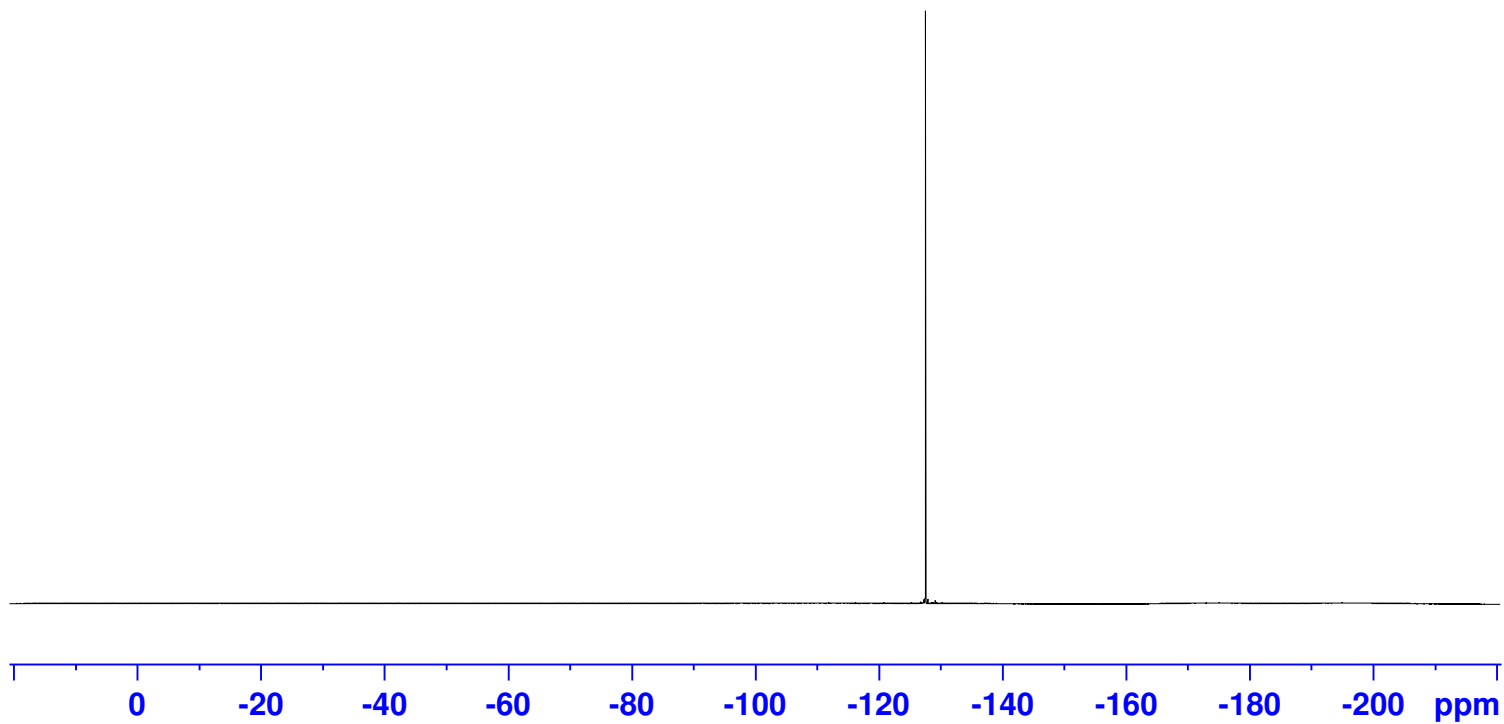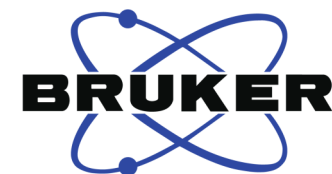

Current Data Parameters  
NAME 3-11  
EXPNO 1  
PROCNO 1

F2 - Acquisition Parameters  
Date\_ 20230927  
Time 20.37 h  
INSTRUM Avance  
PROBHD z116098\_0833 (  
PULPROG zgig  
TD 131072  
SOLVENT CDCl3  
NS 16  
DS 4  
SWH 90909.094 Hz  
FIDRES 1.387163 Hz  
AQ 0.7208960 sec  
RG 101  
DW 5.500 usec  
DE 6.50 usec  
TE 294.5 K  
D1 1.00000000 sec  
D11 0.03000000 sec  
TD0 1  
SFO1 376.4607164 MHz  
NUC1 19F  
P1 18.00 usec  
PLW1 16.73100090 W  
SFO2 400.1316005 MHz  
NUC2 1H  
CPDPRG[2] waltz16  
PCPD2 90.00 usec  
PLW2 20.73200035 W  
PLW12 0.25595000 W

F2 - Processing parameters  
SI 65536  
SF 376.4983662 MHz  
WDW EM  
SSB 0  
LB 0.30 Hz  
GB 0  
PC 1.00

ljx-4-5

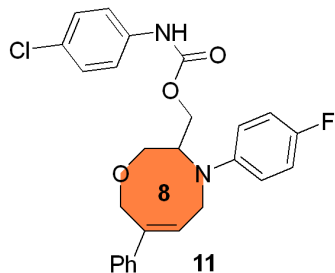

8.948  
7.592  
7.571  
7.326  
7.320  
7.299  
7.276  
7.270  
7.265  
7.260  
6.955  
6.938  
6.351  
6.335  
6.320  
6.320  
4.697  
4.679  
4.654  
4.639  
4.543  
4.525  
4.513  
4.498  
4.473  
4.287  
4.268  
4.259  
4.241  
4.223  
4.211  
4.192  
4.180  
4.155  
4.140  
4.125  
3.930  
3.915  
3.887  
3.872  
3.802  
3.771  
2.054  
2.049

Current Data Parameters  
NAME 20230531-400M  
EXPNO 203  
PROCNO 1

F2 - Acquisition Parameters  
Date\_ 20230531  
Time 6.06  
INSTRUM spect  
PROBHD 5 mm PABBO BB-  
PULPROG zg30  
TD 65536  
SOLVENT Acetone  
NS 8  
DS 2  
SWH 8223.685 Hz  
FIDRES 0.125483 Hz  
AQ 3.9845889 sec  
RG 61.19  
DW 60.800 usec  
DE 6.50 usec  
TE 293.6 K  
D1 1.00000000 sec  
TD0 1

\* H<sub>2</sub>O and Acetone

==== CHANNEL f1 =====  
NUC1 1H  
P1 14.68 usec  
PLW1 14.00000000 W  
SFO1 400.1924713 MHz

F2 - Processing parameters  
SI 65536  
SF 400.1900129 MHz  
WDW EM  
SSB 0  
LB 0.30 Hz  
GB 0  
PC 1.00

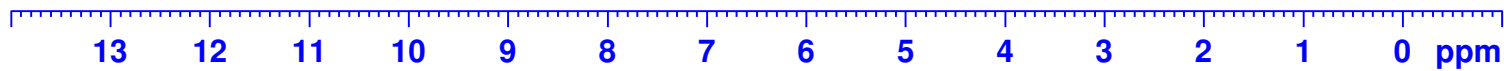

0.79  
2.08  
7.03  
4.02  
1.00  
2.04  
2.04  
3.05  
1.05  
1.01

ljx-4-5

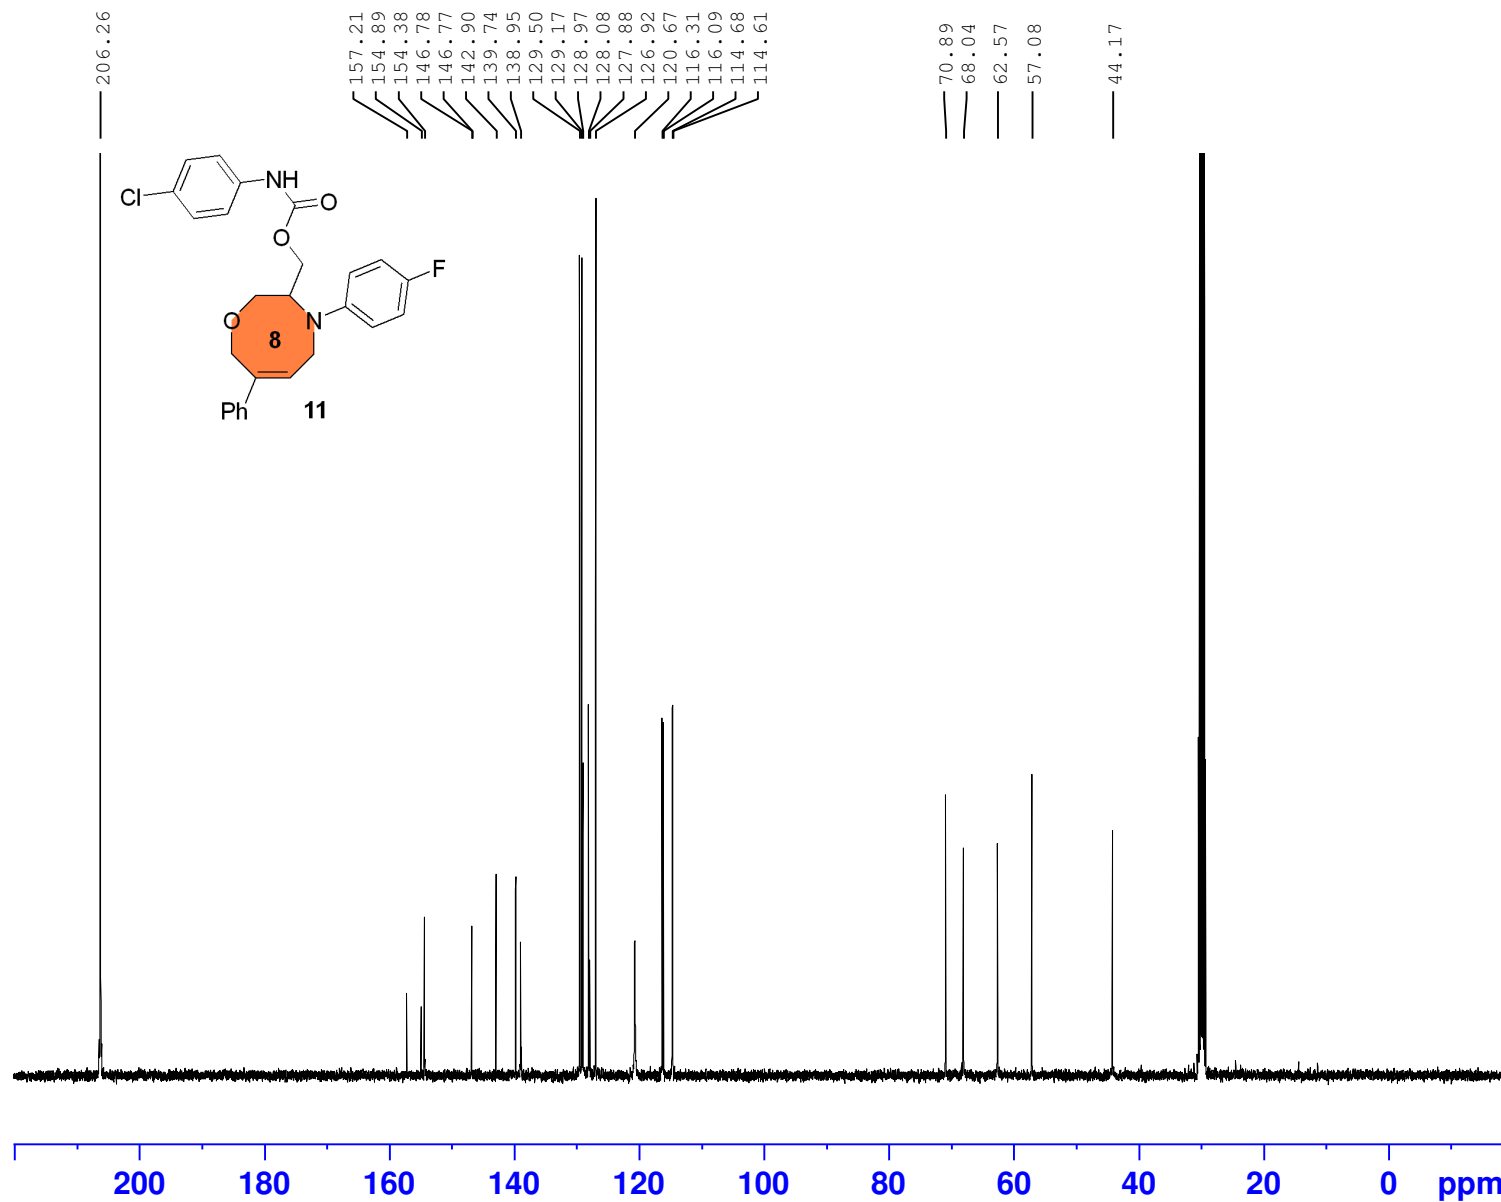

Current Data Parameters  
NAME 20230531-400M  
EXPNO 204  
PROCNO 1

F2 - Acquisition Parameters  
Date\_ 20230531  
Time 6.30  
INSTRUM spect  
PROBHD 5 mm PABBO BB-  
PULPROG zgpg30  
TD 65536  
SOLVENT Acetone  
NS 400  
DS 4  
SWH 24038.461 Hz  
FIDRES 0.366798 Hz  
AQ 1.3631488 sec  
RG 193.13  
DW 20.800 usec  
DE 6.50 usec  
TE 294.2 K  
D1 2.00000000 sec  
D11 0.03000000 sec  
TD0 1

==== CHANNEL f1 =====  
NUC1 13C  
P1 12.00 usec  
PLW1 53.00000000 W  
SFO1 100.6379178 MHz

==== CHANNEL f2 =====  
CPDPRG[2] waltz16  
NUC2 1H  
PCPD2 90.00 usec  
PLW2 14.00000000 W  
PLW12 0.37246999 W  
PLW13 0.30170000 W  
SFO2 400.1916008 MHz

F2 - Processing parameters  
SI 32768  
SF 100.6277761 MHz  
WDW EM  
SSB 0  
LB 1.00 Hz  
GB 0  
PC 1.40

# <sup>19</sup>F NMR

ljx-4-5

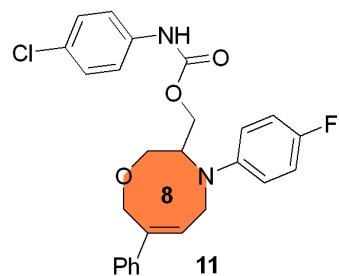

-128.268

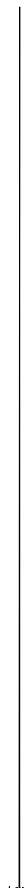

Current Data Parameters  
NAME 20230725-300M  
EXPNO 407  
PROCNO 1

F2 - Acquisition Parameters  
Date\_ 20230725  
Time 12.01  
INSTRUM spect  
PROBHD 5 mm PABBO BB-  
PULPROG zgfhigqn.2  
TD 131072  
SOLVENT CDC13  
NS 20  
DS 4  
SWH 66964.289 Hz  
FIDRES 0.510897 Hz  
AQ 0.9786710 sec  
RG 203  
DW 7.467 usec  
DE 6.50 usec  
TE 298.3 K  
D1 1.00000000 sec  
D11 0.03000000 sec  
D12 0.00002000 sec  
TD0 1

==== CHANNEL f1 =====  
SFO1 282.3761148 MHz  
NUC1 19F  
P1 14.50 usec  
PLW1 10.39999962 W

==== CHANNEL f2 =====  
SFO2 300.1312005 MHz  
NUC2 1H  
CPDPRG[2] waltz16  
PCPD2 90.00 usec  
PLW2 14.00000000 W  
PLW12 0.17284000 W

F2 - Processing parameters  
SI 65536  
SF 282.4043552 MHz  
WDW EM  
SSB 0  
LB 0.30 Hz  
GB 0  
PC 1.00

-20 -40 -60 -80 -100 -120 -140 -160 -180 -200 ppm
